# Supplementary material for: Organocatalytic tandem enantioselective Michael-cyclization of isatin-derived β,γ-unsaturated α-ketoesters with 3-hydroxy-4H-chromen-4-one or 2-hydroxy-1,4-naphthoquinone derivatives
Source: Royal Society of Chemistry journal article supplement (doi:10.1039/c6ra17400k), 2016-01-01
Supplement: c6ra17400k1.pdf [file c6ra17400k1.pdf]

**Organocatalytic Enantioselective Tandem Michael-Cyclization of Isatin Derived  
 $\beta$ ,  $\gamma$ -Unsaturated  $\alpha$ -Ketoesters with 3-Hydroxy-4*H*-Chromen-4-One or 2-  
Hydroxy-1,4-Naphthoquinone Derivatives**

Shao-Jie Yin, Shao-Yun Zhang, Jun-Qi Zhang, Bing-Bing Sun, Wei-Tai Fan, Bing  
Wu and Xing-Wang Wang\*

*Key Laboratory of Organic Synthesis of Jiangsu Province, College of Chemistry,  
Chemical Engineering and Materials Science, Soochow University, Suzhou 215123,  
People's Republic of China*

Fax: +(86)512-6588-0378

E-mail: wangxw@suda.edu.cn

|                                                         |            |
|---------------------------------------------------------|------------|
| <b>1. General information.....</b>                      | <b>2</b>   |
| <b>2. Optimization of reaction.....</b>                 | <b>3</b>   |
| <b>3. Experimental data.....</b>                        | <b>5</b>   |
| <b>4. <sup>1</sup>H NMR and <sup>13</sup>C NMR.....</b> | <b>38</b>  |
| <b>5. HPLC spectra.....</b>                             | <b>83</b>  |
| <b>6. X-ray data of rac-4u.....</b>                     | <b>121</b> |

## 1. General information :

Unless otherwise stated, all reagents were purchased from commercial suppliers and used without further purification. All reactions were carried out in air and using undistilled solvents, without any precautions to exclude moisture unless otherwise noted. Organic solutions were concentrated under reduced pressure on an EYELA N-1001 rotary evaporator. Reactions were monitored by thin-layer chromatography (TLC) on silica gel precoated glass plates ( $0.2 \pm 0.03$  mm thickness, GF-254, particle size 0.01–0.04 mm) from Yantai Chemical Industry Research Institute, P. R. China. Chromatograms were visualized by fluorescence quenching with UV light at 254 nm. Flash column chromatography was performed using silica gel (particle size 0.04 – 0.05 mm).  $^1\text{H}$  and  $^{13}\text{C}$  NMR spectra were recorded in  $\text{CDCl}_3$  on Varian Inova (400 MHz and 100 MHz, respectively) spectrometer.  $^1\text{H}$  NMR data are reported as follows: chemical shift ( $\delta$ , ppm), multiplicity (s = singlet, d = doublet, q = quartet, m = multiplet), coupling constants ( $J$ ) and assignment. Data for  $^{13}\text{C}$  NMR are reported in terms of chemical shift ( $\delta$ , ppm). High-resolution mass spectra (HRMS) for all the compounds were determined on Micromass GCT-TOF mass spectrometer with ESI resource. High performance liquid chromatography (HPLC) was performed on an Agilent 1200 Series chromatographs using a Daicel Chiralpak IA, Chiralpak AD-H or Chiralpak OD-H column (0.46cm x 25 cm). X-ray data were recorded on a Rigaku Mercury CCD/AFC diffractometer. Optical rotations are reported as follows:  $[\alpha]_{\text{D}}^{25}$ . (c in g per 100 mL, solvent).

## 2. Optimization of reaction

**Table 1. Optimization of Organocatalysts**

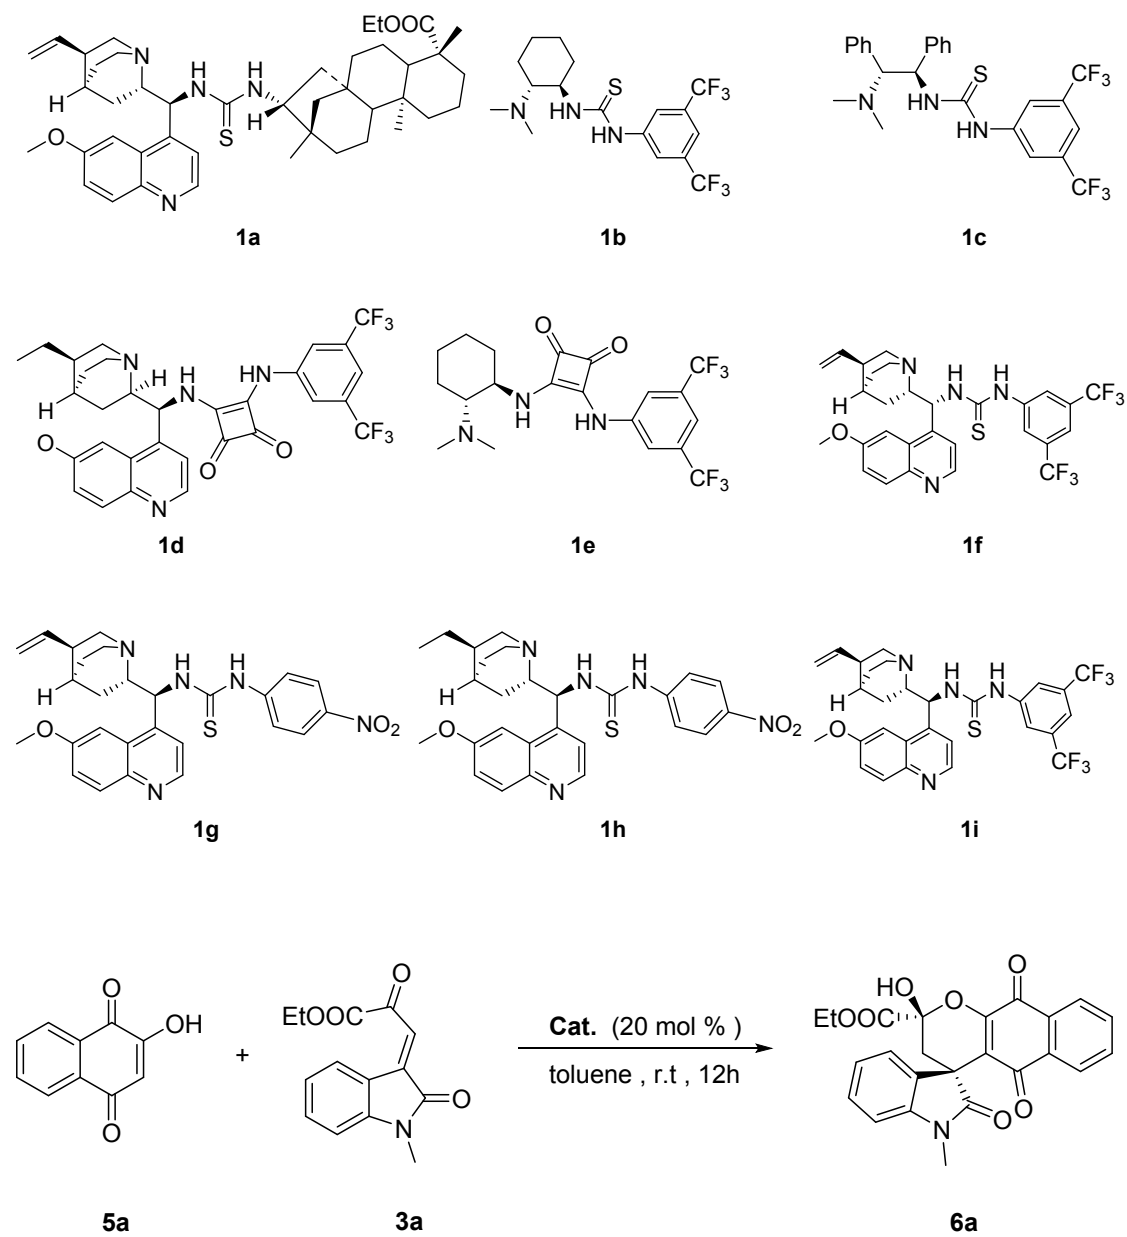

| entry <sup>a</sup> | cat.      | time (h) | yield (%) <sup>b</sup> | <i>dr</i> <sup>c</sup> | <i>ee</i> (%) <sup>d</sup> |
|--------------------|-----------|----------|------------------------|------------------------|----------------------------|
| 1                  | <b>1a</b> | 12       | 73                     | >20:1                  | 66                         |
| 2                  | <b>1b</b> | 12       | 90                     | >20:1                  | -93                        |
| 3                  | <b>1c</b> | 12       | 50                     | >20:1                  | -86                        |
| 4                  | <b>1d</b> | 12       | 76                     | >20:1                  | 38                         |
| 5                  | <b>1e</b> | 12       | 90                     | >20:1                  | -69                        |
| 6                  | <b>1f</b> | 12       | 77                     | >20:1                  | -70                        |
| 7                  | <b>1g</b> | 12       | 89                     | >20:1                  | 95                         |

|   |           |    |    |       |    |
|---|-----------|----|----|-------|----|
| 8 | <b>1h</b> | 12 | 91 | >20:1 | 99 |
| 9 | <b>1i</b> | 12 | 83 | >20:1 | 93 |

<sup>a</sup>Unless noted, the reaction was conducted with **5a**(0.12 mmol), **3a**(0.1 mmol) and **cat.** (20 mol %) in toluene (1 mL) at room temperature for 12 h. <sup>b</sup>Isolated yield.

<sup>c</sup>Determined by <sup>1</sup>H NMR. <sup>d</sup>Determined by chiral HPLC analysis (Chiralpak IA-H).

**Table 2. Optimization of the Reaction Conditions**

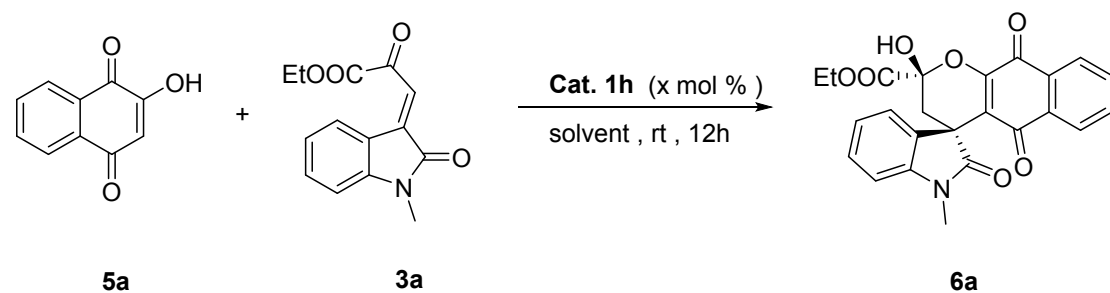

| entry <sup>a</sup> | solvent            | Cat. <b>1h</b> (x mol %) | Conc. (mol/L) | yield (%) <sup>b</sup> | <i>dr</i> <sup>c</sup> | <i>ee</i> (%) <sup>d</sup> |
|--------------------|--------------------|--------------------------|---------------|------------------------|------------------------|----------------------------|
| 1                  | toluene            | 20                       | 0.1           | 91                     | >20:1                  | 99                         |
| 2                  | toluene            | 10                       | 0.1           | 76                     | >20:1                  | 99                         |
| 3                  | toluene            | 5                        | 0.1           | 50                     | >20:1                  | 95                         |
| 4                  | toluene            | 2.5                      | 0.1           | 48                     | >20:1                  | 70                         |
| 5                  | DCM                | 10                       | 0.1           | 83                     | >20:1                  | 98                         |
| 6                  | THF                | 10                       | 0.1           | 80                     | >20:1                  | 96                         |
| 7                  | CH <sub>3</sub> CN | 10                       | 0.1           | 79                     | >20:1                  | 97                         |
| 8                  | MTBE               | 10                       | 0.1           | 87                     | >20:1                  | 95                         |
| 9                  | DCM                | 5                        | 0.1           | 75                     | >20:1                  | 98                         |
| 10                 | DCM                | 5                        | 0.067         | 72                     | >20:1                  | 96                         |
| 11                 | DCM                | 5                        | 0.2           | 81                     | >20:1                  | 98                         |

<sup>a</sup>Unless noted, the reaction was conducted with **5a** (0.12 mmol), **3a** (0.1 mmol) and **cat.1h** (x mol %) in solvent (1 mL) at room temperature for 12 h. <sup>b</sup>Isolated yield.

<sup>c</sup>Determined by <sup>1</sup>H NMR. <sup>d</sup>Determined by chiral HPLC analysis (Chiralpak IA-H.)

### 3. Experimental data

#### 3.1 Synthesis of compounds 4a–4w

**General procedure:** In an ordinary tube equipped with a magnetic stirring bar, the solution of **2** (0.15 mmol, 1.5 equiv), catalyst **1i** (3.0 mg, 5 mol %, 0.05 equiv) in DCM (1.0 mL) was stirred at  $-20\text{ }^{\circ}\text{C}$  for 30 min, and then **3** (0.1 mmol, 1 equiv) was added. The reaction was stirred under  $-20\text{ }^{\circ}\text{C}$  for 40 h, the reaction mixture was directly loaded onto a silica gel and purified by flash chromatography (eluent: petroleum ether/ethyl acetate = 2:1 – 1.5:1) to give desired products **4a–4w**.

**A specific procedure for synthesis of compound 4a:** In an ordinary tube equipped with a magnetic stirring bar, the solution of **2a** (24.3 mg, 0.15 mmol, 1.5 equiv), catalyst **1i** (3.0 mg, 5 mol %, 0.05 equiv) in DCM (1.0 mL) was stirred at  $-20\text{ }^{\circ}\text{C}$  for 30 min, and then **3a** (25.9 mg, 0.1 mmol, 1 equiv) was added. The reaction was stirred under  $-20\text{ }^{\circ}\text{C}$  for 40 h, the reaction mixture was directly loaded onto a silica gel and purified by flash chromatography (eluent: petroleum ether/ethyl acetate = 1.5:1) to give desired products **4a**.

#### Ethyl 2'-hydroxy-1-methyl-2,10'-dioxo-2',3'-dihydro-10'H-spiro[indoline-3,4'-pyrano[3,2-*b*]chromene]-2'-carboxylate **4a**

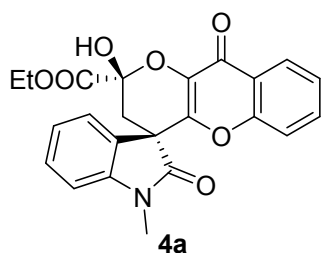

yellow solid, melting point:  $198\text{--}201\text{ }^{\circ}\text{C}$ , 40.9 mg, 97% yield, 98% *ee*,  $> 20:1$  *dr*,  $[\alpha]_{\text{D}}^{25} = + 63.0$  ( $c = 0.51$ ,  $\text{CHCl}_3$ ); [Daicel Chiralpak IA, hexane/*i*-PrOH (70:30), flow rate:  $1.0\text{ mL}\cdot\text{min}^{-1}$ ,  $\lambda = 254\text{ nm}$ ,  $t$  (major) = 13.936,  $t$  (minor) = 24.650];  $^1\text{H NMR}$  (400 MHz,  $\text{CDCl}_3$ )  $\delta$  8.83 (s, 0.5H), 8.21 (ddd,  $J = 13.2, 8.0, 1.2\text{ Hz}$ , 1H), 7.89 (d,  $J = 7.6\text{ Hz}$ , 0.5H), 7.54 – 7.49 (m, 1H), 7.45 (td,  $J = 8.0, 1.2\text{ Hz}$ , 0.5H), 7.38 (td,  $J = 8.0, 1.2\text{ Hz}$ , 0.5H), 7.33 – 7.29 (m, 1H), 7.23 – 7.18 (m, 1H), 7.15 – 7.03 (m, 2H), 6.98 (d,  $J = 7.8\text{ Hz}$ , 0.5H), 5.05 (s, 0.5H), 4.42 – 4.32 (dq,  $J = 7.2, 6.8\text{ Hz}$ , 2H), 3.38 (d,  $J = 8.0\text{ Hz}$ , 3H), 3.31 (d,  $J = 14.0\text{ Hz}$ , 0.5H), 3.07 (d,  $J = 14.8\text{ Hz}$ , 0.5H), 2.69 (d,  $J = 14.8\text{ Hz}$ , 0.5H), 2.33 (d,  $J = 14.0\text{ Hz}$ , 0.5H), 1.38 (dt,  $J = 15.8, 7.1\text{ Hz}$ , 3H);  $^{13}\text{C NMR}$  (101 MHz,  $\text{CDCl}_3$ )  $\delta$  177.71, 175.47, 171.97, 171.84, 168.43, 167.33, 155.05, 154.99, 147.63, 145.48, 143.87, 143.78, 137.11, 136.67, 133.58, 133.44, 130.23, 129.86, 129.54, 128.80, 127.69,

126.32, 126.08, 124.78, 124.77, 124.60, 123.76, 123.74, 123.71, 123.41, 118.07, 117.87, 109.66, 108.61, 94.90, 93.63, 63.71, 62.80, 50.16, 49.56, 37.60, 37.51, 27.41, 27.25, 14.15, 14.08; IR: 3276.4, 2961.7, 1740.5, 1714.4, 1627.4, 1611.0, 1468.6, 1260.0, 1192.0, 1034.8, 1020.7, 796.4, 758.9, 692.5  $\text{cm}^{-1}$ ; HRMS-ESI calcd. for  $\text{C}_{23}\text{H}_{19}\text{NNaO}_7$   $[\text{M}+\text{Na}]^+$  444.1054, found: 444.1065.

**Ethyl 2'-hydroxy-1-(methoxymethyl)-2,10'-dioxo-2',3'-dihydro-10'H-spiro[indoline-3,4'-pyrano[3,2-*b*]chromene]-2'-carboxylate 4b**

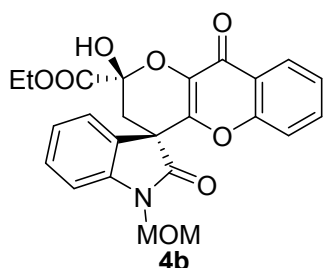

yellow solid, melting point: 141–144  $^{\circ}\text{C}$ , 42.9 mg, 95% yield, 98% *ee*, > 20:1 *dr*,  $[\alpha]_{\text{D}}^{25} = +98.0$  ( $c = 0.50$ ,  $\text{CHCl}_3$ ); [Daicel Chiralpak IA, hexane/*i*-PrOH (70:30), flow rate: 1.0  $\text{mL}\cdot\text{min}^{-1}$ ,  $\lambda = 254$  nm,  $t$  (major) = 12.362,  $t$  (minor) = 17.090];  $^1\text{H}$  NMR (400 MHz,  $\text{CDCl}_3$ )  $\delta$  8.48 (s, 0.3H), 8.22 (d,  $J = 7.2$  Hz, 0.4H), 8.18 (d,  $J = 7.6$  Hz, 0.6H), 7.93 (d,  $J = 7.6$  Hz, 0.6H), 7.51 – 7.49 (m, 1H), 7.42 (t,  $J = 7.2$  Hz, 0.3H), 7.36 (t,  $J = 7.6$  Hz, 0.7H), 7.33 – 7.28 (m, 1H), 7.23 (d,  $J = 2.9$  Hz, 0.3H), 7.21 – 7.15 (m, 1.2H), 7.11 – 7.04 (m, 1.7H), 5.29 (s, 0.7H), 5.29 (t,  $J = 10.1$  Hz, 1H), 5.21 (dd,  $J = 10.8, 5.2$  Hz, 1H), 4.36 (dq,  $J = 12.7, 5.7$  Hz, 2H), 3.42 (d,  $J = 7.6$  Hz, 3H), 3.30 (d,  $J = 13.6$  Hz, 0.7H), 3.11 (d,  $J = 14.8$  Hz, 0.3H), 2.72 (d,  $J = 14.8$  Hz, 0.35H), 2.39 (d,  $J = 14.0$  Hz, 0.65H), 1.37 (dt,  $J = 14.2, 7.1$  Hz, 3H);  $^{13}\text{C}$  NMR (101 MHz,  $\text{CDCl}_3$ )  $\delta$  178.59, 176.28, 171.92, 171.75, 168.29, 167.22, 155.00, 154.96, 147.42, 145.43, 142.10, 141.90, 136.94, 136.49, 133.73, 133.58, 130.34, 129.65, 129.37, 128.27, 127.82, 126.40, 126.18, 125.12, 124.86, 124.67, 123.90, 123.84, 123.74, 123.70, 117.73, 117.61, 110.10, 110.06, 94.80, 93.64, 72.17, 71.95, 63.68, 62.88, 56.61, 56.37, 50.50, 49.96, 37.78, 37.62, 14.14, 14.07; IR: 3514.9, 3282.1, 2961.4, 2928.7, 1738.7, 1720.6, 1631.9, 1620.9, 1484.3, 1467.9, 1368.6, 1341.2, 1217.1, 1194.4, 1147.4, 1103.9, 1039.2, 977.2, 923.7, 860.6, 775.0, 758.9, 701.2, 660.5, 613.3  $\text{cm}^{-1}$ ; HRMS-ESI calcd. for  $\text{C}_{24}\text{H}_{22}\text{NO}_8$   $[\text{M}+\text{H}]^+$  452.1340, found: 452.1348.

**Ethyl 1-benzyl-2'-hydroxy-2,10'-dioxo-2',3'-dihydro-10'H-spiro[indoline-3,4'-pyrano[3,2-*b*]chromene]-2'-carboxylate 4c**

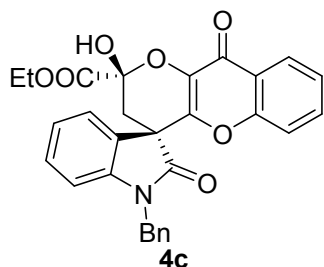

white solid, melting point: 141–144  $^{\circ}\text{C}$ , 48.7 mg, 98%

yield, 99% *ee*, > 20:1 *dr*,  $[\alpha]_{\text{D}}^{25} = + 114.0$  ( $c = 0.50$ ,  $\text{CHCl}_3$ ); [Daicel Chiralpak IA, hexane/*i*-PrOH (70:30), flow rate:  $1.0 \text{ mL} \cdot \text{min}^{-1}$ ,  $\lambda = 254 \text{ nm}$ ,  $t$  (major) = 17.371,  $t$  (minor) = 25.698];  $^1\text{H NMR}$  (400 MHz,  $\text{CDCl}_3$ )  $\delta$  8.83 (s, 0.45H), 8.23 (d,  $J = 8.0 \text{ Hz}$ , 0.45H), 8.18 (d,  $J = 8.0 \text{ Hz}$ , 0.55H), 7.94 (d,  $J = 7.6 \text{ Hz}$ , 0.55H), 7.55 – 7.50 (m, 1H), 7.42 – 7.33 (m, 5H), 7.32 – 7.30 (m, 1.5H), 7.23 (d,  $J = 8.4 \text{ Hz}$ , 1H), 7.12 (t,  $J = 7.6 \text{ Hz}$ , 0.5H), 7.06 (d,  $J = 7.6 \text{ Hz}$ , 0.7H), 7.02 (d,  $J = 3.2 \text{ Hz}$ , 0.5H), 7.00 (d,  $J = 4.4 \text{ Hz}$ , 0.3H), 6.92 (d,  $J = 8.0 \text{ Hz}$ , 0.4H), 6.85 (d,  $J = 7.6 \text{ Hz}$ , 0.5H), 5.33 (s, 0.6H), 5.26 (t,  $J = 15.6 \text{ Hz}$ , 1H), 4.81 (t,  $J = 15.2 \text{ Hz}$ , 1H), 4.37 (dq,  $J = 7.2, 5.2 \text{ Hz}$ , 2H), 3.38 (dd,  $J = 14.0, 2.0 \text{ Hz}$ , 0.6H), 3.13 (d,  $J = 15.2 \text{ Hz}$ , 0.4H), 2.76 (d,  $J = 14.8 \text{ Hz}$ , 0.4H), 2.42 (d,  $J = 14.0 \text{ Hz}$ , 0.6H), 1.38 (dt,  $J = 7.2, 5.2 \text{ Hz}$ , 3H);  $^{13}\text{C NMR}$  (101 MHz,  $\text{CDCl}_3$ )  $\delta$  177.95, 175.64, 171.97, 171.81, 168.39, 167.31, 154.00, 154.96, 147.84, 145.80, 136.90, 136.45, 135.44, 134.53, 133.66, 133.48, 130.15, 129.87, 129.44, 129.13, 128.94, 128.71, 128.32, 127.99, 127.78, 127.32, 127.30, 126.37, 126.13, 124.80, 124.70, 124.60, 123.79, 123.75, 123.69, 123.43, 117.76, 117.60, 110.65, 109.59, 94.90, 93.66, 63.64, 62.83, 50.17, 49.55, 44.63, 44.46, 37.42, 37.37, 14.13, 14.07; IR: 3484.2, 3281.4, 2959.1, 2923.7, 1739.1, 1714.4, 1632.2, 1610.4, 1485.9, 1466.6, 1364.0, 1346.3, 1284.3, 1263.4, 1216.9, 1197.6, 1182.2, 1145.9, 1081.0, 1038.4, 974.7, 947.8, 883.8, 808.3, 753.4, 734.7, 698.6, 630.1  $\text{cm}^{-1}$ ; HRMS-ESI calcd. for  $\text{C}_{29}\text{H}_{24}\text{NO}_7$   $[\text{M}+\text{H}]^+$  498.1547, found:498.1545.

**Ethyl 1-allyl-2'-hydroxy-2,10'-dioxo-2',3'-dihydro-10'H-spiro[indoline-3,4'-pyrano[3,2-*b*]chromene]-2'-carboxylate 4d**

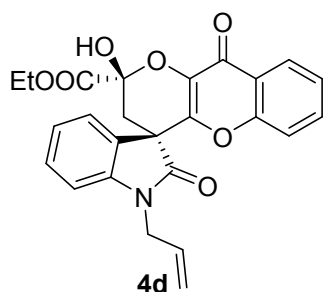

white solid, melting point: 158–160 °C, 43.4 mg, 97% yield, 99% *ee*, > 20:1 *dr*,  $[\alpha]_{\text{D}}^{25} = + 97.3$  ( $c = 0.52$ ,  $\text{CHCl}_3$ ); [Daicel Chiralpak IA, hexane/*i*-PrOH (70:30), flow rate:  $1.0 \text{ mL} \cdot \text{min}^{-1}$ ,  $\lambda = 254 \text{ nm}$ ,  $t$  (major) = 15.593,  $t$  (minor) = 19.550];  $^1\text{H NMR}$  (400 MHz,  $\text{CDCl}_3$ )  $\delta$  8.79 (s, 0.45H), 8.21 (dd,  $J = 17.2, 7.6 \text{ Hz}$ , 1H), 7.93 (d,  $J = 7.6 \text{ Hz}$ , 0.50H), 7.54 – 7.50 (m, 1H), 7.41 (t,  $J = 7.6 \text{ Hz}$ , 0.6H), 7.36 – 7.29 (m, 1.4H), 7.25 (d,  $J = 7.2 \text{ Hz}$ , 0.5H), 7.17 (t,  $J = 7.6 \text{ Hz}$ , 0.5H), 7.11 – 7.01 (m, 2H), 6.94 (d,  $J = 7.6 \text{ Hz}$ , 0.5H), 5.99 – 5.88 (m, 1H), 5.34 (dd,  $J = 16.8, 10.6 \text{ Hz}$ , 2H), 5.21 (s, 0.55H),

4.60 (dd,  $J = 16.8, 3.6$  Hz, 1H), 4.36 (dt,  $J = 7.6, 5.6$  Hz, 3H), 3.33 (d,  $J = 14.0$  Hz, 0.55H), 3.11 (d,  $J = 14.8$  Hz, 0.45H), 2.72 (d,  $J = 14.8$  Hz, 0.45H), 2.38 (d,  $J = 14.0$  Hz, 0.55H), 1.38 (dt,  $J = 14.4, 7.1$  Hz, 3H);  $^{13}\text{C}$  NMR (101 MHz,  $\text{CDCl}_3$ )  $\delta$  177.59, 175.22, 171.98, 171.82, 168.42, 167.32, 155.02, 149.97, 147.72, 145.61, 143.07, 142.90, 136.98, 136.52, 133.66, 133.50, 130.76, 130.16, 129.96, 129.83, 129.45, 128.72, 127.78, 126.37, 126.12, 124.80, 124.70, 124.61, 123.82, 123.74, 123.70, 123.37, 118.00, 117.85, 117.68, 117.44, 110.51, 109.49, 94.88, 93.64, 63.69, 62.83, 50.16, 49.53, 43.05, 42.92, 37.50, 37.47, 14.15, 14.08; IR: 3544.6, 3259.4, 2963.1, 2854.3, 1740.2, 1710.8, 1625.9, 1609.6, 1487.0, 1467.4, 1432.8, 1280.3, 1260.9, 1238.1, 1198.6, 1186.3, 1107.0, 1039.8, 1004.7, 977.5, 943.9, 884.7, 855.7, 797.5, 761.9, 702.3, 668.9, 655.5, 636.0, 619.9  $\text{cm}^{-1}$ ; HRMS-ESI calcd. for  $\text{C}_{25}\text{H}_{22}\text{NO}_7$   $[\text{M}+\text{H}]^+$  448.1391, found: 448.1393.

**1- benzyl 2'-ethyl 2'-hydroxy-2,10'-dioxo-2',3'-dihydro-10'H-spiro[indoline-3,4'-pyrano[3,2-*b*]chromene]-1,2'-dicarboxylate 4e**

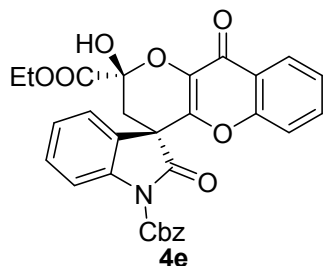

yellow solid, melting point: 196–198 °C, 39.5 mg, 73% yield, 99% *ee*, > 20:1 *dr*,  $[\alpha]_{\text{D}}^{25} = + 98.4$  ( $c = 0.50$ ,  $\text{CHCl}_3$ ); [Daicel Chiralpak IA, hexane/*i*-PrOH (70:30), flow rate: 1.0  $\text{mL} \cdot \text{min}^{-1}$ ,  $\lambda = 254$  nm,  $t$  (major) = 28.027,  $t$  (minor) = 41.336];  $^1\text{H}$  NMR (400 MHz,  $\text{CDCl}_3$ )  $\delta$  8.82 (s, 0.45H), 8.23 (dd,  $J = 14.8, 7.6$  Hz, 1H), 7.93 (d,  $J = 7.6$  Hz, 0.55H), 7.54 (t,  $J = 7.6$  Hz, 1H), 7.40 – 7.29 (m, 6.45H), 7.23 – 7.01 (m, 3H), 6.92 (d,  $J = 7.6$  Hz, 0.5H), 6.85 (d,  $J = 7.6$  Hz, 0.5H), 5.27 (t,  $J = 15.6$  Hz, 1H), 5.11 (s, 0.55H), 4.82 (t,  $J = 14.0$  Hz, 1H), 4.39 (dq,  $J = 12.4, 7.2$  Hz, 2H), 3.39 (d,  $J = 14.0$  Hz, 0.55H), 3.14 (d,  $J = 14.8$  Hz, 0.45H), 2.75 (d,  $J = 15.2$  Hz, 0.45H), 2.41 (d,  $J = 14.0$  Hz, 0.55H), 1.40 (dt,  $J = 12.4, 7.2$  Hz, 3H);  $^{13}\text{C}$  NMR (101 MHz,  $\text{CDCl}_3$ )  $\delta$  178.00, 175.66, 171.99, 171.85, 168.45, 167.34, 155.07, 155.02, 147.80, 143.05, 142.86, 136.95, 136.50, 135.47, 134.56, 133.69, 133.54, 130.18, 129.89, 129.50, 129.18, 128.99, 128.78, 128.38, 128.04, 127.80, 127.37, 127.36, 126.46, 126.22, 124.86, 124.75, 124.67, 123.84, 123.78, 123.47, 117.81, 117.64, 110.66, 109.64, 94.93, 93.64, 63.78, 62.90, 50.21, 49.56, 44.69, 44.52, 37.46, 14.18, 14.12; IR: 3482.3, 3279.6, 2960.8, 2922.9, 1743.1,



1715.8, 1640.6, 1609.8, 1488.3, 1467.7, 1432.2, 1369.4, 1282.4, 1262.1, 1196.7, 1184.7, 1146.1, 1109.0, 1040.2, 1013.5, 972.1, 860.0, 772.8, 753.5, 728.6, 696.9, 630.7  $\text{cm}^{-1}$ ; HRMS-ESI calcd. for  $\text{C}_{30}\text{H}_{24}\text{NO}_9$   $[\text{M}+\text{H}]^+$  542.1146, found:542.1153.

**Ethyl 1-acetyl-2'-hydroxy-2,10'-dioxo-2',3'-dihydro-10'H-spiro[indoline-3,4'-pyrano[3,2-*b*]chromene]-2'-carboxylate 4f**

yellow solid, melting point: 150–153  $^{\circ}\text{C}$ , 24.2 mg, 54% yield, 98% *ee*, > 20:1 *dr*,

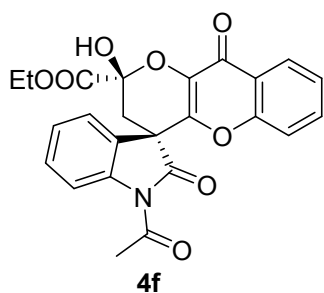

$[\alpha]_{\text{D}}^{25} = +113.3$  ( $c = 0.30$ ,  $\text{CHCl}_3$ ); [Daicel Chiralpak IA, hexane/*i*-PrOH (70:30), flow rate: 1.0  $\text{mL}\cdot\text{min}^{-1}$ ,  $\lambda = 254$  nm,  $t$  (major) = 15.747,  $t$  (minor) = 20.035];  $^1\text{H}$  NMR (400 MHz,  $\text{CDCl}_3$ )  $\delta$  8.34 (d,  $J = 8.0$  Hz, 0.8H), 8.31 (d,  $J = 6.4$  Hz, 0.2H), 8.23 – 8.21 (m, 1H), 7.95 (d,  $J = 7.6$  Hz, 0.7H), 7.56 (dd,  $J = 7.2, 1.2$  Hz, 1H), 7.95 (d,  $J = 2.8$  Hz,

0.3H), 7.47 – 7.40 (m, 1H), 7.34 – 7.29 (m, 1.3H), 7.23 (d,  $J = 8.0$  Hz, 0.7H), 7.18 (d,  $J = 8.4$  Hz, 1H), 7.14 (d,  $J = 8.4$  Hz, 0.3H), 5.10 (s, 0.7H), 4.38 (dq,  $J = 15.6, 7.2$  Hz, 2H), 3.32 (d,  $J = 14.0$  Hz, 0.8H), 3.08 (d,  $J = 15.2$  Hz, 0.2H), 2.81 (d,  $J = 15.2$  Hz, 0.3H), 2.74 (d,  $J = 5.7$  Hz, 3H), 2.47 (d,  $J = 14.0$  Hz, 0.7H), 1.38 (dt,  $J = 15.2, 7.2$  Hz, 3H);  $^{13}\text{C}$  NMR (101 MHz,  $\text{CDCl}_3$ )  $\delta$  177.06, 171.94, 170.71, 168.06, 155.10, 147.08, 140.19, 136.56, 133.94, 133.82, 129.91, 128.76, 127.90, 127.28, 126.85, 126.41, 126.22, 125.96, 125.62, 125.08, 124.91, 123.69, 123.42, 118.05, 117.96, 117.37, 116.65, 94.46, 93.56, 63.93, 63.21, 50.70, 50.51, 38.87, 38.56, 27.35, 27.01, 14.17, 14.13; IR: 3350.2, 2926.9, 2924.5, 1760.2, 1741.5, 1724.4, 1640.9, 1613.6, 1465.6, 1434.8, 1370.1, 1339.0, 1306.9, 1268.1, 1198.3, 1147.9, 1107.9, 1063.4, 973.7, 802.7, 763.4  $\text{cm}^{-1}$ ; HRMS-ESI calcd. for  $\text{C}_{24}\text{H}_{20}\text{NO}_8$   $[\text{M}+\text{H}]^+$  450.1183, found:450.1188.

**Ethyl 5-fluoro-2'-hydroxy-1-methyl-2,10'-dioxo-2',3'-dihydro-10'H-spiro[indoline-3,4'-pyrano[3,2-*b*]chromene]-2'-carboxylate 4g**

light red solid, melting point: 114–116  $^{\circ}\text{C}$ , 36.0 mg, 82% yield, 99% *ee*, > 20:1 *dr*,  $[\alpha]_{\text{D}}^{25} = +135.8$  ( $c = 0.46$ ,  $\text{CHCl}_3$ ); [Daicel Chiralpak IA, hexane/*i*-PrOH (85:15),

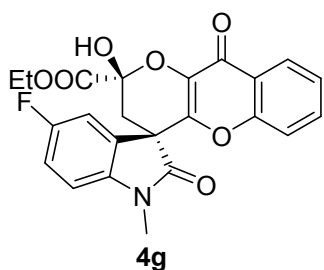

flow rate: 1.0  $\text{mL}\cdot\text{min}^{-1}$ ,  $\lambda = 254$  nm,  $t$  (major) = 30.576];  $^1\text{H}$  NMR (400 MHz,  $\text{CDCl}_3$ )  $\delta$  8.75 (s, 0.3H), 8.22 (dd,  $J = 8.0, 1.6$  Hz, 0.3H), 8.18 (dd,  $J = 8.0, 1.6$  Hz, 0.7H), 7.69

(dd,  $J = 8.4, 2.4$  Hz, 0.7H), 7.55 – 7.50 (m, 1H), 7.34 – 7.27 (m, 1H), 7.13 (dd,  $J = 8.8, 2.4$  Hz, 1H), 7.10 – 7.05 (m, 1H), 7.00 – 6.96 (m, 0.7H), 6.89 (dd,  $J = 8.4, 4.0$  Hz, 0.7H), 5.28 (d,  $J = 2.2$  Hz, 0.7H), 4.36 (m, 2H), 3.35 (dt,  $J = 14.4, 7.1$  Hz, 3H), 3.31 (d,  $J = 2.4$  Hz, 0.3H), 3.27 (d,  $J = 2.4$  Hz, 0.3H), 3.02 (d,  $J = 14.8$  Hz, 0.3H), 2.70 (d,  $J = 14.8$  Hz, 0.3H), 2.34 (d,  $J = 14.0$  Hz, 0.7H), 1.37 (dt,  $J = 14.4, 7.1$  Hz, 3H);  $^{13}\text{C}$  NMR (101 MHz,  $\text{CDCl}_3$ )  $\delta$  177.40, 175.14, 171.96, 171.75, 168.21, 167.19, 160.22 ( $J = 243.2$  Hz), 154.50 ( $J = 239.6$  Hz), 155.02, 154.09, 147.07, 144.79, 139.79, 139.77, 137.16, 136.60, 133.72, 133.57, 131.23, 131.14, 130.71 ( $J = 6.4$  Hz) 130.66 ( $J = 6.9$  Hz), 128.94, 126.36, 126.12, 124.90, 124.72, 123.71, 123.68, 118.00, 117.84, 116.75 ( $J = 23.6$  Hz), 116.08 ( $J = 26.1$  Hz), 115.93 ( $J = 23.6$  Hz), 112.15 ( $J = 25.4$  Hz), 110.44 ( $J = 8.1$  Hz), 109.03 ( $J = 8.1$  Hz), 94.79, 93.59, 63.73, 62.89, 50.41 ( $J = 1.7$  Hz), 49.86 ( $J = 1.6$  Hz), 37.43, 27.58, 27.41, 14.14, 14.07; IR: 3298.6, 2927.8, 1747.9, 1722.8, 1636.2, 1613.7, 1492.8, 1469.3, 1352.8, 1258.6, 1198.5, 1151.0, 1105.5, 1030.8, 972.2, 866.1, 797.3, 734.3, 683.5  $\text{cm}^{-1}$ ; HRMS-ESI calcd. for  $\text{C}_{23}\text{H}_{19}\text{FNO}_7$   $[\text{M}+\text{H}]^+$  440.1140, found:440.1146.

**Ethyl 5-chloro-2'-hydroxy-1-methyl-2,10'-dioxo-2',3'-dihydro-10'H-spiro**

**[indoline-3,4'-pyrano[3,2-*b*]chromene]-2'-carboxylate 4h**

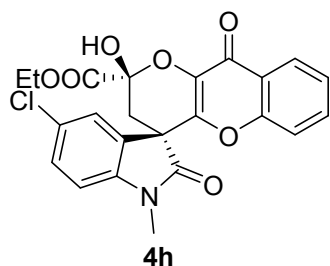

yellow solid, melting point: 128–131 °C, 35.0 mg, 77% yield, 94% *ee*, > 20:1 *dr*,  $[\alpha]_{\text{D}}^{25} = + 188.8$  ( $c = 0.50$ ,  $\text{CHCl}_3$ ); [Daicel Chiralpak IA, hexane/*i*-PrOH (85:15), flow rate: 1.0  $\text{mL} \cdot \text{min}^{-1}$ ,  $\lambda = 254$  nm,  $t$  (major) = 30.714,  $t$  (minor) = 28.046];  $^1\text{H}$  NMR (400 MHz,  $\text{CDCl}_3$ )  $\delta$  8.63 (s,

0.3H), 8.21 (dd,  $J = 14.0, 8.0$  Hz, 1H), 7.90 (d,  $J = 1.6$  Hz, 0.7H), 7.55 – 7.51 (m, 1H), 7.42 (dd,  $J = 8.0, 1.6$  Hz, 0.3H), 7.35 (dd,  $J = 8.4, 2.0$  Hz, 0.7H), 7.32 – 7.28 (m, 1H), 7.21 (d,  $J = 1.6$  Hz, 0.3H), 7.14 (d,  $J = 8.4$  Hz, 0.7H), 7.10 (d,  $J = 8.8$  Hz, 0.3H), 6.97 (d,  $J = 8.4$  Hz, 0.3H), 6.90 (d,  $J = 8.4$  Hz, 0.7H), 5.18 (s, 0.7H), 4.37 (dq,  $J = 14.8, 7.2$  Hz, 2H), 3.35 (d,  $J = 9.5$  Hz, 3H), 3.28 (d,  $J = 14.0$  Hz, 0.7H), 3.03 (d,  $J = 14.8$  Hz, 0.3H), 2.69 (d,  $J = 14.8$  Hz, 0.3H), 2.33 (d,  $J = 14.0$  Hz, 0.7H), 1.37 (dt,  $J = 14.8, 7.2$  Hz, 3H);  $^{13}\text{C}$  NMR (101 MHz,  $\text{CDCl}_3$ )  $\delta$  177.30, 175.04, 171.93, 171.73, 168.17, 167.16, 155.02, 154.96, 146.91, 144.69, 142.39, 137.18, 136.63, 133.73, 133.59,

131.22, 131.04, 130.38, 130.30, 130.25, 129.57, 128.84, 128.26, 126.39, 126.15, 124.92, 124.75, 124.39, 123.71, 118.03, 117.90, 110.64, 109.52, 94.77, 93.55, 63.78, 62.93, 50.18, 49.64, 37.44, 27.57, 27.39, 14.16, 14.09; IR: 3474.2, 2932.3, 1746.1, 1728.2, 1632.8, 1611.2, 1489.4, 1468.1, 1429.9, 1345.7, 1189.4, 1148.1, 1104.3, 1030.5, 977.3, 834.7, 808.9, 762.2, 703.7, 676.4  $\text{cm}^{-1}$ ; HRMS-ESI calcd. for  $\text{C}_{23}\text{H}_{19}\text{ClNO}_7$   $[\text{M}+\text{H}]^+$  456.0845, found:456.0832.

**Ethyl 5-bromo-2'-hydroxy-1-methyl-2,10'-dioxo-2',3'-dihydro-10'H-spiro**

**[indoline-3,4'-pyrano[3,2-*b*]chromene]-2'-carboxylate 4i**

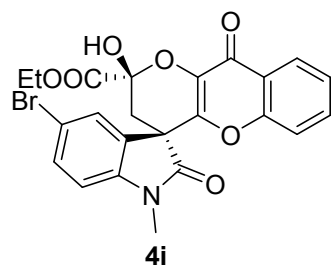

white solid, melting point: 124–127 °C, 44.5mg, 89% yield, 93% *ee*, > 20:1 *dr*,  $[\alpha]_{\text{D}}^{25} = + 78.6$  ( $c = 0.60$ ,  $\text{CHCl}_3$ ); [Daicel Chiralpak IA, hexane/*i*-PrOH (80:20), flow rate: 1.0  $\text{mL} \cdot \text{min}^{-1}$ ,  $\lambda = 254$  nm,  $t$  (major) = 22.013,  $t$  (minor) = 19.790];  $^1\text{H}$  NMR (400 MHz,  $\text{CDCl}_3$ )  $\delta$  8.61 (s,

0.3H), 8.22 (dd,  $J = 8.0, 1.6$  Hz, 0.3H), 8.18 (dd,  $J = 8.0, 1.2$  Hz, 0.7H), 8.03 (d,  $J = 1.6$  Hz, 0.7H), 7.57 – 7.48 (m, 2H), 7.34 (d,  $J = 2.0$  Hz, 0.3H), 7.31 (d,  $J = 8.0$  Hz, 0.7H), 7.13 (d,  $J = 8.4$  Hz, 0.7H), 7.10 (d,  $J = 8.4$  Hz, 0.3H), 6.92 (d,  $J = 8.4$  Hz, 0.3H), 6.85 (d,  $J = 8.0$  Hz, 0.7H), 5.22 (s, 0.7H), 4.36 (dq,  $J = 14.4, 7.2$  Hz, 2H), 3.35 (d,  $J = 9.7$  Hz, 3H), 3.29 (d,  $J = 2.0$  Hz, 0.3H), 3.26 (d,  $J = 2.4$  Hz, 0.35H), 3.03 (d,  $J = 14.8$  Hz, 0.35H), 2.68 (d,  $J = 14.8$  Hz, 0.3H), 2.33 (d,  $J = 14.0$  Hz, 0.7H), 1.36 (dt,  $J = 14.4, 7.2$  Hz, 3H);  $^{13}\text{C}$  NMR (101 MHz,  $\text{CDCl}_3$ )  $\delta$  177.18, 174.93, 171.91, 171.70, 168.14, 167.15, 154.99, 154.94, 146.89, 144.69, 142.90, 142.87, 137.17, 136.62, 133.72, 133.57, 133.20, 132.46, 131.54, 130.94, 130.66, 127.09, 126.35, 126.12, 124.90, 124.73, 123.72, 123.69, , 118.02, 117.91, 117.38, 116.15, 111.09, 110.03, 94.76, 93.55, 63.75, 62.91, 50.10, 49.56, 37.46, 37.44, 27.54, 27.36, 14.15, 14.08; IR: 3494.2, 3280.2, 2961.3, 1723.3, 1364.5, 1610.4, 1480.4, 1467.2, 1339.7, 1282.0, 1218.4, 1173.6, 1146.4, 1106.2, 1040.3, 977.1, 961.1, 813.5, 797.2, 764.6, 747.7, 669.0, 643.9  $\text{cm}^{-1}$ ; HRMS-ESI calcd. for  $\text{C}_{23}\text{H}_{19}\text{ClNO}_7$   $[\text{M}+\text{H}]^+$  500.0339, found:500.0339.

**Ethyl 2'-hydroxy-1,5-dimethyl-2,10'-dioxo-2',3'-dihydro-10'H-spiro[indoline-3,4'-pyrano[3,2-*b*]chromene]-2'-carboxylate 4j**

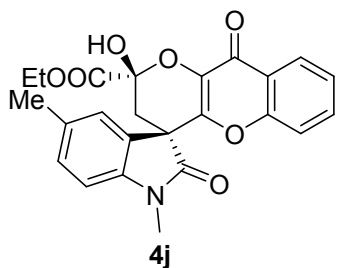

white solid, melting point: 226–228 °C, 43.0 mg, 99% yield, 96% *ee*, > 20:1 *dr*,  $[\alpha]_{\text{D}}^{25} = + 24.2$  ( $c = 0.50$ ,  $\text{CHCl}_3$ ); [Daicel Chiralpak IA, hexane/*i*-PrOH (80:20), flow rate: 1.0 mL·min<sup>-1</sup>,  $\lambda = 254$  nm,  $t$  (major) = 17.666,  $t$  (minor) = 15.895]; <sup>1</sup>H NMR (400 MHz,  $\text{CDCl}_3$ )  $\delta$  8.89 (s,

0.5H), 8.22 (dd,  $J = 8.0, 1.6$  Hz, 0.5H), 8.18 (dd,  $J = 8.0, 1.6$  Hz, 0.5H), 7.69 (s, 0.5H), 7.53 – 7.48 (m, 1H), 7.32 – 7.28 (m, 1H), 7.22 (d,  $J = 8.0$  Hz, 0.5H), 7.17 – 7.13 (m, 1H), 7.09 (d,  $J = 8.4$  Hz, 0.5H), 7.02 (s, 0.5H), 6.91 (d,  $J = 7.6$  Hz, 0.5H), 6.85 (d,  $J = 8.0$  Hz, 0.5H), 5.08 (d,  $J = 2.2$  Hz, 0.5H), 4.35 (dt,  $J = 7.2, 5.0$  Hz, 2H), 3.34 (d,  $J = 8.0$  Hz, 3H), 3.29 (dd,  $J = 14.0, 2.4$  Hz, 0.5H), 3.04 (d,  $J = 14.8$  Hz, 0.5H), 2.66 (d,  $J = 14.8$  Hz, 0.5H), 2.31 (d,  $J = 14.0$  Hz, 0.5H), 2.30 (d,  $J = 8.8$  Hz, 3H), 1.37 (dt,  $J = 16.6, 7.2$  Hz, 3H); <sup>13</sup>C NMR (101 MHz,  $\text{CDCl}_3$ )  $\delta$  177.59, 175.37, 171.98, 171.84, 168.48, 167.37, 155.04, 154.99, 147.87, 145.70, 141.43, 141.36, 137.05, 136.59, 134.65, 133.52, 133.38, 132.99, 130.47, 129.86, 128.74, 128.73, 128.38, 126.28, 126.03, 124.71, 124.55, 124.47, 123.74, 123.71, 118.11, 117.94, 109.39, 108.30, 94.91, 93.64, 63.66, 62.76, 50.18, 49.61, 37.59, 27.41, 27.25, 21.32, 21.23, 14.14, 14.07; IR: 3494.7, 3282.8, 2961.6, 1745.8, 1718.6, 1636.8, 1611.3, 1499.5, 1359.2, 1282.1, 1260.8, 1196.1, 1103.7, 1037.9, 977.5, 964.8, 811.7, 796.6, 760.2, 699.6, 669.8, 647.7 cm<sup>-1</sup>; HRMS-ESI calcd. for  $\text{C}_{24}\text{H}_{22}\text{NO}_7$   $[\text{M}+\text{H}]^+$  436.1391, found:436.1396.

**Ethyl 2'-hydroxy-5-methoxy-1-methyl-2,10'-dioxo-2',3'-dihydro-10'H-spiro [indoline-3,4'-pyrano[3,2-*b*]chromene]-2'-carboxylate 4k**

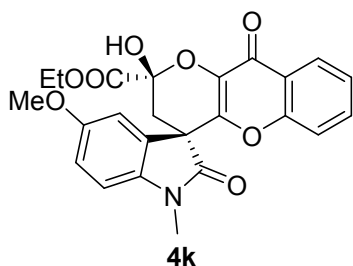

white solid, melting point: 191–193 °C, 44.1 mg, 98% yield, 98% *ee*, > 20:1 *dr*,  $[\alpha]_{\text{D}}^{25} = + 141.6$  ( $c = 0.50$ ,  $\text{CHCl}_3$ ); [Daicel Chiralpak IA, hexane/*i*-PrOH (80:20), flow rate: 1.0 mL·min<sup>-1</sup>,  $\lambda = 254$  nm,  $t$  (major) = 22.303,  $t$  (minor) = 27.639]; <sup>1</sup>H NMR (400 MHz,  $\text{CDCl}_3$ )  $\delta$  8.95

(s, 0.5H), 8.20 – 8.16 (m, 1H), 7.55 (d,  $J = 2.0$  Hz, 0.5H), 7.53 – 7.49 (m, 1H), 7.29 (t,  $J = 1.2$  Hz, 1H), 7.11 (dd,  $J = 19.6, 8.4$  Hz, 1H), 6.93 (s, 1H), 6.89 (d,  $J = 2.4$  Hz, 0.5H), 6.84 (d,  $J = 18.8$  Hz, 1H), 5.07 (d,  $J = 1.6$  Hz, 0.5H), 4.34 (dq,  $J = 15.6, 7.2$

Hz, 2H), 3.74 (d,  $J = 8.0$  Hz, 3H), 3.33 (d,  $J = 7.6$  Hz, 3H), 3.28 (d,  $J = 2.0$  Hz, 0.5H), 3.04 (d,  $J = 14.8$  Hz, 0.5H), 2.67 (d,  $J = 14.8$  Hz, 0.5H), 2.32 (d,  $J = 14.0$  Hz, 0.5H), 1.36 (dt,  $J = 15.6, 7.2$  Hz, 3H);  $^{13}\text{C}$  NMR (101 MHz,  $\text{CDCl}_3$ )  $\delta$  177.27, 175.05, 171.92, 171.81, 168.41, 167.37, 157.49, 156.38, 155.02, 154.97, 147.62, 145.52, 137.15, 137.06, 136.99, 136.59, 133.54, 133.42, 130.97, 129.96, 126.24, 126.02, 124.73, 124.57, 123.71, 123.69, 118.08, 117.92, 114.82, 114.58, 114.29, 110.57, 110.22, 108.92, 94.91, 93.60, 63.69, 62.77, 55.95, 55.82, 50.51, 49.89, 37.63, 37.45, 27.47, 27.31, 14.14, 14.06; IR: 3350.6, 2963.2, 2922.7, 1748.1, 1714.7, 1652.5, 1637.1, 1611.6, 1497.2, 147.0, 1363.4, 1339.6, 1260.9, 1236.3, 1202.1, 1160.5, 1144.2, 1108.8, 1039.5, 1025.3, 977.0, 806.5, 758.1, 694.3, 679.9, 646.6  $\text{cm}^{-1}$ ; HRMS-ESI calcd. for  $\text{C}_{24}\text{H}_{22}\text{NO}_8$   $[\text{M}+\text{H}]^+$  452.1340, found: 452.1352.

**Ethyl 6-chloro-2'-hydroxy-1-methyl-2,10'-dioxo-2',3'-dihydro-10'H-spiro**

**[indoline-3,4'-pyrano[3,2-*b*]chromene]-2'-carboxylate 4l**

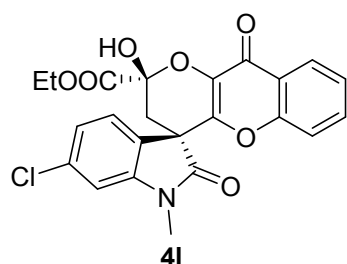

yellow solid, melting point: 111–113 °C, 38.3mg, 86% yield, 97% *ee*, > 20:1 *dr*,  $[\alpha]_{\text{D}}^{25} = + 57.2$  ( $c = 0.65$ ,  $\text{CHCl}_3$ ); [Daicel Chiralpak IA, hexane/*i*-PrOH (80:20), flow rate: 1.0  $\text{mL} \cdot \text{min}^{-1}$ ,  $\lambda = 254$  nm,  $t$  (major) = 22.883,  $t$  (minor) = 30.794];  $^1\text{H}$  NMR (400 MHz,  $\text{CDCl}_3$ )  $\delta$  8.58

(s, 0.3H), 8.22 (dd,  $J = 8.0, 1.2$  Hz, 0.3H), 8.18 (dd,  $J = 8.0, 1.6$  Hz, 0.7H), 7.82 (d,  $J = 8.0$  Hz, 0.7H), 7.55 – 7.51 (m, 1H), 7.34 – 7.28 (m, 1H), 7.15 (d,  $J = 7.4$  Hz, 1.3H), 7.10 (d,  $J = 8.4$  Hz, 0.3H), 7.05 – 7.03 (m, 1H), 6.97 (d,  $J = 2.0$  Hz, 0.7H), 5.19 (s, 0.7H), 4.36 (dq,  $J = 11.1, 5.6$  Hz, 2H), 3.35 (d,  $J = 9.2$  Hz, 3H), 3.27 (d,  $J = 14.4$  Hz, 0.7H), 3.03 (d,  $J = 14.8$  Hz, 0.3H), 2.67 (d,  $J = 14.8$  Hz, 0.3H), 2.31 (d,  $J = 14.0$  Hz, 0.7H), 1.36 (dt,  $J = 11.1, 5.6$  Hz, 3H);  $^{13}\text{C}$  NMR (101 MHz,  $\text{CDCl}_3$ )  $\delta$  177.76, 175.49, 171.96, 171.77, 168.28, 167.21, 155.03, 154.97, 147.06, 145.02, 144.88, 137.15, 136.64, 136.18, 135.45, 133.74, 133.61, 128.85, 128.11, 127.09, 126.39, 126.13, 124.92, 124.81, 123.74, 124.67, 123.73, 123.69, 123.29, 118.03, 117.85, 110.51, 109.38, 94.80, 93.58, 63.79, 62.93, 49.84, 49.25, 37.57, 37.40, 27.56, 27.38, 14.16, 14.09; IR: 3348.8, 3277.2, 2961.0, 2923.4, 1722.4, 1365.8, 1607.2, 1468.0, 1365.6, 1281.9, 1260.5, 1188.7, 1147.4, 1103.4, 1078.4, 1025.5, 971.2, 798.4, 759.1, 645.0,

621.5  $\text{cm}^{-1}$ ; HRMS-ESI calcd. for  $\text{C}_{23}\text{H}_{19}\text{ClNO}_7$   $[\text{M}+\text{H}]^+$  456.0845, found:456.0833.

**Ethyl 6-bromo-2'-hydroxy-1-methyl-2,10'-dioxo-2',3'-dihydro-10'H-spiro [indoline-3,4'-pyrano[3,2-*b*]chromene]-2'-carboxylate 4m**

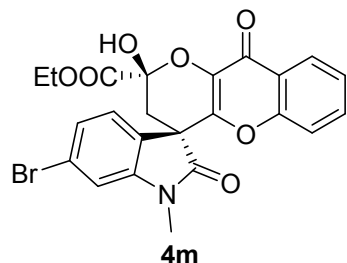

light yellow solid, melting point: 105–107 °C, 43.1 mg, 86% yield, 97% *ee*, > 20:1 *dr*,  $[\alpha]_{\text{D}}^{25} = +245.2$  ( $c = 0.25$ ,  $\text{CHCl}_3$ ); [Daicel Chiralpak IA, hexane/*i*-PrOH (80:20), flow rate: 1.0  $\text{mL}\cdot\text{min}^{-1}$ ,  $\lambda = 254$  nm,  $t$  (major) = 22.846,  $t$  (minor) = 31.330];  $^1\text{H}$  NMR (400 MHz,  $\text{CDCl}_3$ )  $\delta$  8.57 (s, 0.3H), 8.22 (dd,  $J = 8.0, 1.6$  Hz, 0.3H), 8.18 (dd,  $J = 8.0, 1.6$  Hz, 0.7H), 7.76 (d,  $J = 8.4$  Hz, 0.7H), 7.55 – 7.51 (m, 1H), 7.32 – 7.28 (m, 1.3H), 7.21 (d,  $J = 2.0$  Hz, 0.3H), 7.19 (d,  $J = 1.6$  Hz, 0.7H), 7.15 (d,  $J = 8.4$  Hz, 1H), 7.12 (d,  $J = 1.6$  Hz, 0.7H), 7.09 (d,  $J = 1.6$  Hz, 0.3H), 5.13 (d,  $J = 2.0$  Hz, 0.7H), 4.36 (dt,  $J = 14.4, 7.1$  Hz, 2H), 3.35 (d,  $J = 9.3$  Hz, 3H), 3.28 (dd,  $J = 14.4, 1.6$  Hz, 0.7H), 3.02 (d,  $J = 14.8$  Hz, 0.3H), 2.67 (d,  $J = 15.2$  Hz, 0.3H), 2.30 (d,  $J = 14.0$  Hz, 0.7H), 1.37 (dt,  $J = 14.4, 7.1$  Hz, 3H);  $^{13}\text{C}$  NMR (101 MHz,  $\text{CDCl}_3$ )  $\delta$  177.63, 175.35, 171.89, 171.72, 168.25, 167.19, 155.01, 154.96, 146.91, 145.14, 144.77, 137.16, 136.67, 133.73, 133.60, 129.17, 128.66, 127.69, 1127.61, 126.37, 126.23, 126.13, 125.12, 124.90, 124.73, 123.86, 123.70, 123.30, 118.02, 117.85, 113.27, 112.16, 94.79, 93.55, 63.80, 62.91, 49.89, 49.29, 37.49, 37.34, 27.55, 27.37, 14.15, 14.09; IR: 3396.7, 3280.6, 2961.7, 2924.1, 1723.6, 1636.6, 1602.5, 1468.6, 1365.5, 1282.9, 1260.5, 1188.9, 1149.5, 1101.7, 1025.4, 970.9, 798.9, 759.3, 707.0, 643.9, 620.5  $\text{cm}^{-1}$ ; HRMS-ESI calcd. for  $\text{C}_{23}\text{H}_{19}\text{BrNO}_7$   $[\text{M}+\text{H}]^+$  500.0339, found:500.0346.

**Ethyl 2'-hydroxy-6-methoxy-1-methyl-2,10'-dioxo-2',3'-dihydro-10'H-spiro [indoline-3,4'-pyrano[3,2-*b*]chromene]-2'-carboxylate 4n**

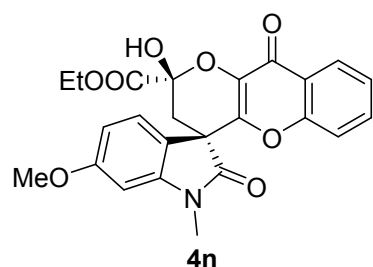

light red solid, melting point: 210–211 °C, 33.4 mg, 74% yield, > 99% *ee*, > 20:1 *dr*,  $[\alpha]_{\text{D}}^{25} = +186.0$  ( $c = 0.20$ ,  $\text{CHCl}_3$ ); [Daicel Chiralpak IA, hexane/*i*-PrOH (80:20), flow rate: 1.0  $\text{mL}\cdot\text{min}^{-1}$ ,  $\lambda = 254$  nm,  $t$  (major) = 26.010];  $^1\text{H}$  NMR (400 MHz,  $\text{CDCl}_3$ )  $\delta$  8.77 (s, 0.4H), 8.24 – 8.19 (m, 1H), 7.76 (d,  $J = 8.0$  Hz, 0.5H), 7.52 (t,  $J = 7.6$  Hz, 1H), 7.30

(dd,  $J = 14.4, 7.2$  Hz, 1H), 7.15 (d,  $J = 8.4$  Hz, 0.5H), 7.10 (d,  $J = 8.4$  Hz, 1H), 6.66 – 6.59 (m, 1H), 6.56 – 6.54 (m, 1H), 4.94 (d,  $J = 1.8$  Hz, 0.6H), 4.36 (dd,  $J = 14.9, 7.3$  Hz, 2H), 3.86 (d,  $J = 7.6$  Hz, 3H), 3.34 (d,  $J = 6.0$  Hz, 3H), 3.28 (dd,  $J = 14.0, 2.0$  Hz, 0.6H), 3.02 (d,  $J = 15.2$  Hz, 0.4H), 2.65 (d,  $J = 15.2$  Hz, 0.4H), 2.29 (d,  $J = 14.0$  Hz, 0.6H), 1.38 (dd,  $J = 14.9, 7.3$  Hz, 3H);  $^{13}\text{C}$  NMR (101 MHz,  $\text{CDCl}_3$ )  $\delta$  178.34, 176.05, 171.99, 171.89, 168.52, 167.41, 161.64, 161.11, 155.07, 155.03, 147.89, 145.81, 145.16, 136.54, 133.43, 128.53, 126.36, 126.11, 124.75, 124.60, 124.56, 123.76, 121.88, 120.28, 118.11, 117.91, 108.28, 106.82, 97.87, 96.71, 94.98, 93.67, 63.75, 62.82, 55.88, 55.72, 49.74, 49.13, 37.77, 37.68, 27.42, 27.28, 14.18, 14.11; IR: 3334.4, 2962.9, 2938.6, 1740.2, 1707.5, 1629.4, 1612.5, 1470.9, 1456.4, 1373.9, 1288.0, 1262.2, 1194.5, 1149.8, 1101.2, 1062.6, 969.3, 927.7, 877.8, 804.3, 758.7, 691.5, 649.3, 639.4, 617.3  $\text{cm}^{-1}$ ; HRMS-ESI calcd. for  $\text{C}_{24}\text{H}_{22}\text{NO}_8$   $[\text{M}+\text{H}]^+$  452.1340, found:452.1353

**Ethyl 7-fluoro-2'-hydroxy-1-methyl-2,10'-dioxo-2',3'-dihydro-10'H-spiro [indoline-3,4'-pyrano[3,2-*b*]chromene]-2'-carboxylate 4o**

yellow solid, melting point: 190–192 °C, 43.5 mg, 99% yield, 99% *ee*, > 20:1 *dr*,  $[\alpha]_{\text{D}}^{25} = + 132.9$  ( $c = 0.54$ ,  $\text{CHCl}_3$ ); [Daicel Chiralpak IA, hexane/*i*-PrOH (80:20),

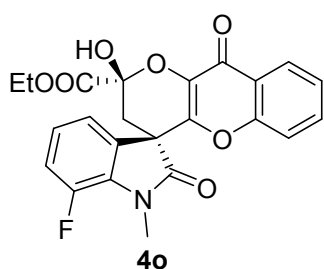

flow rate: 1.0  $\text{mL} \cdot \text{min}^{-1}$ ,  $\lambda = 254$  nm,  $t$  (major) = 19.841,  $t$  (minor) = 40.459];  $^1\text{H}$  NMR (400 MHz,  $\text{CDCl}_3$ )  $\delta$  8.65 (s, 0.4H), 8.21 (dd,  $J = 8.0, 1.2$  Hz, 0.4H), 8.17 (dd,  $J = 8.0, 1.2$  Hz, 0.6H), 7.71 (d,  $J = 7.2$  Hz, 0.6H), 7.55 – 7.50 (m, 1H), 7.33 – 7.28 (m, 1H), 7.18 – 7.16 (m, 1H),

7.14 (d,  $J = 2.4$  Hz, 0.4H), 7.12 – 7.07 (m, 1H), 7.02 – 6.97 (m, 1H), 5.20 (s, 0.6H), 4.35 (dq,  $J = 14.6, 7.2$  Hz, 2H), 3.56 (d,  $J = 2.8$  Hz, 3H), 3.28 (dd,  $J = 14.4, 1.6$  Hz, 0.6H), 3.03 (d,  $J = 14.8$  Hz, 0.4H), 2.70 (d,  $J = 14.8$  Hz, 0.4H), 2.34 (d,  $J = 14.0$  Hz, 0.6H), 1.36 (dt,  $J = 14.6, 7.2$  Hz, 3H);  $^{13}\text{C}$  NMR (101 MHz,  $\text{CDCl}_3$ )  $\delta$  177.34, 175.14, 171.93, 171.75, 168.27, 167.19, 155.02, 154.97, 148.02 (d,  $J = 244.8$  Hz), 147.84 (d,  $J = 242.0$  Hz), 147.11, 137.02, 136.57, 133.71, 136.57, 132.35 (d,  $J = 2.5$  Hz), 131.41 (d,  $J = 2.7$  Hz), 130.56 (d,  $J = 8.4$  Hz), 130.53 (d,  $J = 8.8$  Hz), 126.33, 126.08, 125.45 (d,  $J = 6.5$  Hz), 124.86, 124.67, 123.84 (d,  $J = 8.6$  Hz), 123.68 (d,  $J = 4.2$  Hz), 123.58

(d,  $J = 3.2$  Hz), 119.65 (d,  $J = 3.3$  Hz), 118.28 (d,  $J = 19.0$  Hz), 118.03, 117.85, 117.47 (d,  $J = 18.8$  Hz), 94.81, 93.54, 63.72, 62.86, 50.33 (d,  $J = 1.9$  Hz), 49.69 (d,  $J = 2.1$  Hz), 37.76, 37.59, 30.02 (d,  $J = 5.8$  Hz), 29.84 (d,  $J = 6.2$  Hz), 14.13, 14.06; IR: 3516.5, 3277.3, 2961.2, 2922.7, 1736.5, 1715.6, 1624.6, 1610.9, 1477.8, 1466.6, 1364.9, 1336.3, 1284.1, 1260.1, 1245.1, 1196.8, 1108.1, 1080.2, 1048.3, 1023.4, 988.0, 963.4, 800.7, 758.6, 702.5, 642.4, 628.9  $\text{cm}^{-1}$ ; HRMS-ESI calcd. for  $\text{C}_{23}\text{H}_{19}\text{FNO}_7$   $[\text{M}+\text{H}]^+$  440.1140, found:440.1151.

**Ethyl 2'-hydroxy-1,7-dimethyl-2,10'-dioxo-2',3'-dihydro-10'H-spiro[indoline-3,4'-pyrano[3,2-*b*]chromene]-2'-carboxylate 4p**

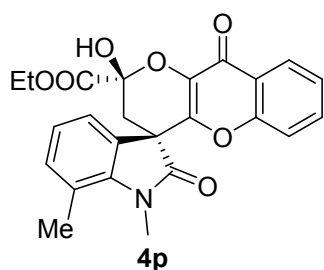

yellow solid, melting point: 191–194 °C, 43.1 mg, 99% yield, > 99% *ee*, > 20:1 *dr*,  $[\alpha]_{\text{D}}^{25} = + 92.0$  ( $c = 0.50$ ,  $\text{CHCl}_3$ ); [Daicel Chiralpak IA, hexane/*i*-PrOH (80:20), flow rate: 1.0  $\text{mL} \cdot \text{min}^{-1}$ ,  $\lambda = 254$  nm,  $t$  (major) = 31.735];  $^1\text{H}$  NMR (400 MHz,  $\text{CDCl}_3$ )  $\delta$  8.92 (s, 0.65H), 8.21 (dd,  $J = 8.0, 1.2$  Hz, 0.65H), 8.17 (dd,  $J = 8.0, 1.6$  Hz, 0.35H), 7.73 (d,  $J = 7.2$  Hz, 0.35H), 7.53 – 7.49 (m, 1H), 7.29 (t,  $J = 7.2$  Hz, 1H), 7.18 – 7.12 (m, 1.35H), 7.10 – 7.07 (m, 0.35H), 7.05 – 7.02 (m, 1.3H), 6.93 (t,  $J = 7.6$  Hz, 0.65H), 5.07 (s, 0.35H), 4.34 (dt,  $J = 16.0, 7.2$  Hz, 2H), 3.62 (s, 3H), 3.28 (d,  $J = 14.0$  Hz, 0.35H), 2.99 (d,  $J = 14.8$  Hz, 0.65H), 2.66 (d,  $J = 3.2$  Hz, 3H), 2.62 (d,  $J = 14.4$  Hz, 0.65H), 2.30 (d,  $J = 14.4$  Hz, 0.35H), 1.36 (dt,  $J = 16.0, 7.2$  Hz, 3H);  $^{13}\text{C}$  NMR (101 MHz,  $\text{CDCl}_3$ )  $\delta$  178.28, 176.32, 171.95, 171.83, 168.44, 167.33, 155.06, 155.00, 147.92, 145.78, 141.50, 141.46, 137.04, 137.64, 133.93, 133.53, 133.38, 133.31, 130.50, 129.38, 126.25, 126.01, 125.51, 124.71, 124.59, 124.55, 123.70, 123.18, 121.64, 121.33, 120.03, 118.10, 117.90, 94.91, 93.63, 63.63, 62.73, 49.61, 49.04, 38.10, 37.95, 30.79, 30.75, 19.40, 19.01, 14.13, 14.05; IR: 3503.2, 3277.8, 2960.2, 2924.9, 1736.6, 1694.9, 1667.7, 1648.6, 1634.0, 1612.0, 1466.3, 1377.1, 1361.1, 1287.1, 1260.5, 1195.2, 1145.4, 1111.1, 1071.5, 1021.2, 965.3, 909.4, 795.5, 763.3, 749.9, 699.7, 643.2, 623.9  $\text{cm}^{-1}$ ; HRMS-ESI calcd. for  $\text{C}_{24}\text{H}_{22}\text{NO}_7$   $[\text{M}+\text{H}]^+$  436.1391, found:436.1400.

**Ethyl 2'-hydroxy-1,5,7-trimethyl-2,10'-dioxo-2',3'-dihydro-10'H-spiro[indoline-3,4'-pyrano[3,2-*b*]chromene]-2'-carboxylate 4q**



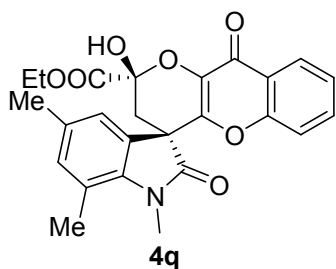

yellow solid, melting point: 200–202 °C, 35.9 mg, 80% yield, 98% *ee*, > 20:1 *dr*,  $[\alpha]_{\text{D}}^{25} = + 45.0$  ( $c = 0.50$ ,  $\text{CHCl}_3$ ); [Daicel Chiralpak IA, hexane/*i*-PrOH (80:20), flow rate: 1.0 mL·min<sup>-1</sup>,  $\lambda = 254$  nm,  $t$  (major) = 21.379,  $t$  (minor) = 19.769]; <sup>1</sup>H NMR (400 MHz,  $\text{CDCl}_3$ )  $\delta$  8.98 (s,

0.7H), 8.22 (dd,  $J = 8.0, 1.6$  Hz, 0.7H), 8.18 (dd,  $J = 8.0, 1.6$  Hz, 0.3H), 7.54 – 7.50 (m, 1.3H), 7.32 (d,  $J = 0.8$  Hz, 0.2H), 7.29 (d,  $J = 8.0$  Hz, 0.8H), 7.18 (d,  $J = 8.4$  Hz, 0.3H), 7.14 (d,  $J = 8.4$  Hz, 0.7H), 6.94 (s, 0.7H), 6.89 (s, 0.3H), 6.82 (s, 0.7H), 5.03 (d,  $J = 2.0$  Hz, 0.3H), 4.35 (dq,  $J = 16.8, 7.2$  Hz, 2H), 3.59 (s, 3H), 3.27 (dd,  $J = 14.0, 2.4$  Hz, 0.3H), 2.98 (d,  $J = 14.8$  Hz, 0.7H), 2.63 (d,  $J = 11.2$  Hz, 0.6H), 2.62 (s, 3H), 2.29 (d,  $J = 14.4$  Hz, 0.4H), 2.23 (d,  $J = 7.2$  Hz, 3H), 1.36 (dt,  $J = 16.8, 7.2$  Hz, 3H); <sup>13</sup>C NMR (101 MHz,  $\text{CDCl}_3$ )  $\delta$  178.16, 176.23, 171.99, 171.87, 168.52, 167.41, 155.08, 155.03, 148.16, 146.01, 139.04, 139.00, 137.00, 136.59, 134.37, 133.76, 133.48, 133.35, 132.69, 130.61, 129.42, 126.26, 126.11, 126.01, 124.68, 124.53, 123.74, 122.28, 120.99, 118.17, 117.99, 94.94, 93.64, 63.64, 62.73, 49.67, 49.12, 38.10, 38.06, 30.72, 20.97, 20.88, 19.23, 18.84, 14.14, 14.07; IR: 3151.5, 2961.7, 2921.9, 1757.4, 1710.4, 1660.6, 1632.5, 1612.4, 1485.3, 1468.8, 1442.9, 1371.2, 1287.2, 1260.4, 1200.4, 1139.1, 1099.0, 1077.0, 1025.7, 961.6, 870.6, 800.3, 761.7, 695.9, 648.9 cm<sup>-1</sup>; HRMS-ESI calcd. for  $\text{C}_{25}\text{H}_{24}\text{NO}_7$   $[\text{M}+\text{H}]^+$  450.1547, found:450.1558.

**5,6-difluoro-2'-hydroxy-1-methyl-2,10'-dioxo-2',3'-dihydro-10'H-spiro[indoline-3,4'-pyrano[3,2-*b*]chromene]-2'-carboxylate 4r**

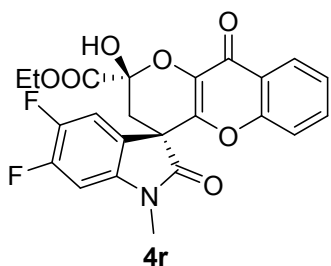

white solid, melting point: 113–115 °C, 43.9 mg, 96% yield, 93% *ee*, > 20:1 *dr*,  $[\alpha]_{\text{D}}^{25} = + 98.2$  ( $c = 0.50$ ,  $\text{CHCl}_3$ ); [Daicel Chiralpak IA, hexane/*i*-PrOH (80:20), flow rate: 1.0 mL·min<sup>-1</sup>,  $\lambda = 254$  nm,  $t$  (major) = 22.295,  $t$  (minor) = 27.049]; <sup>1</sup>H NMR (400 MHz,  $\text{CDCl}_3$ )  $\delta$  8.54 (s,

0.2H), 8.20 (dd,  $J = 8.0, 1.2$  Hz, 0.2H), 8.16 (dd,  $J = 8.0, 1.6$  Hz, 0.8H), 7.82 (dd,  $J = 10.0, 8.0$  Hz, 0.8H), 7.55 – 7.51 (m, 1H), 7.29 (t,  $J = 8.0$  Hz, 1H), 7.14 (d,  $J = 8.4$  Hz, 0.8H), 7.10 (t,  $J = 8.0$  Hz, 0.2H), 6.90 (dd,  $J = 9.2, 6.0$  Hz, 0.2H), 6.80 (dd,  $J = 9.6,$

6.4 Hz, 1H), 5.51 (s, 0.8H), 4.36 (dq,  $J = 13.6, 6.4$  Hz, 2H), 3.34 (d,  $J = 10.2$  Hz, 3H), 3.25 (dd,  $J = 14.0, 1.6$  Hz, 0.8H), 3.00 (d,  $J = 14.8$  Hz, 0.2H), 2.69 (d,  $J = 15.2$  Hz, 0.2H), 2.33 (d,  $J = 14.4$  Hz, 0.8H), 1.36 (dt,  $J = 13.6, 6.4$  Hz, 3H);  $^{13}\text{C}$  NMR (101 MHz,  $\text{CDCl}_3$ )  $\delta$  17.54, 175.30, 171.96, 171.70, 168.10, 167.14, 154.98, 154.93, 151.39, (d,  $J = 248.2$  Hz), 151.25 (d,  $J = 248.1$  Hz), 146.83 (d,  $J = 241.4$  Hz), 146.76, 146.71 (d,  $J = 244.3$  Hz), 140.26 (d,  $J = 11.6$  Hz), 137.19, 136.55, 136.55, 133.82, 133.68, 126.38, 126.13, 124.99 (d,  $J = 2.9$  Hz), 124.92 (d,  $J = 4.0$  Hz), 124.80, 123.68, 123.62, 118.01 (d,  $J = 11.7$  Hz), 117.95, 117.83 (d,  $J = 42.0$  Hz), 98.90, 98.67, 94.76, 93.61, 63.73, 62.96, 50.06, 49.52, 37.53, 37.41, 27.69, 27.51, 14.12, 14.06; IR: 3279.2, 3070.6, 2961.2, 2161.1, 2031.0, 1979.4, 1626.2, 1613.7, 1506.3, 1428.2, 1391.7, 1368.7, 1283.9, 1252.0, 1185.7, 1152.3, 1096.7, 1024.9, 1007.6, 960.4, 873.5, 786.3, 758.8, 688.3, 645.2, 618.4  $\text{cm}^{-1}$ ; HRMS-ESI calcd. for  $\text{C}_{23}\text{H}_{18}\text{F}_2\text{NO}_7$   $[\text{M}+\text{H}]^+$  458.1046, found:458.1048.

**Methyl 2'-hydroxy-1-methyl-2,10'-dioxo-2',3'-dihydro-10'H-spiro[indoline-3,4'-pyrano[3,2-*b*]chromene]-2'-carboxylate 4s**

light red solid, melting point: 205–207 °C, 39.9 mg, 98% yield, 98% *ee*, > 20:1 *dr*,  $[\alpha]_{\text{D}}^{25} = +71.5$  ( $c = 0.52$ ,  $\text{CHCl}_3$ ); [Daicel Chiralpak IA, hexane/*i*-PrOH (70:30), flow

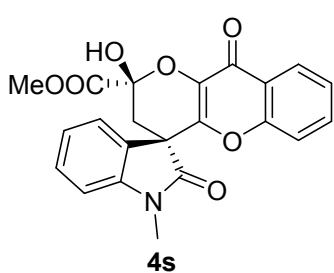

rate: 1.0  $\text{mL} \cdot \text{min}^{-1}$ ,  $\lambda = 254$  nm,  $t$  (major) = 20.279,  $t$  (minor) = 32.183];  $^1\text{H}$  NMR (400 MHz,  $\text{CDCl}_3$ )  $\delta$  8.88 (s, 0.55H), 8.22 (dd,  $J = 8.0, 1.2$  Hz, 0.6H), 8.19 (dd,  $J = 8.4, 1.6$  Hz, 0.4H), 7.87 (d,  $J = 7.6$  Hz, 0.45H), 7.53 – 7.49 (m, 1H), 7.44 (td,  $J = 7.6, 1.2$  Hz, 0.6H), 7.38

(dt,  $J = 8.0, 1.2$  Hz, 0.4H), 7.33 – 7.29 (m, 1H), 7.20 (dd,  $J = 12.0, 6.4$  Hz, 1H), 7.15 – 7.12 (m, 0.55H), 7.09 – 7.06 (m, 1H), 7.04 (d,  $J = 8.0$  Hz, 0.6H), 6.97 (d,  $J = 7.6$  Hz, 0.4H), 5.01 (d,  $J = 2.0$  Hz, 0.45H), 3.91 (s, 3H), 3.37 (d,  $J = 10.8$  Hz, 3H), 3.30 (dd,  $J = 14.0, 2.4$  Hz, 0.45H), 3.07 (d,  $J = 14.8$  Hz, 0.55H), 2.69 (d,  $J = 15.2$  Hz, 0.55H), 2.33 (d,  $J = 14.0$  Hz, 0.45H);  $^{13}\text{C}$  NMR (101 MHz,  $\text{CDCl}_3$ )  $\delta$  177.71, 175.38, 171.94, 171.84, 168.87, 167.82, 155.06, 155.00, 147.64, 145.48, 143.86, 143.00, 137.03, 136.56, 133.62, 133.47, 130.27, 129.82, 129.57, 128.71, 127.64, 126.33, 126.08, 124.81, 124.79, 124.63, 123.75, 123.72, 123.69, 123.43, 118.08, 117.88, 109.69,

108.62, 94.97, 93.72, 54.07, 53.52, 50.15, 49.49, 37.64, 37.48, 27.43, 27.25; IR: 3316.0, 2961.4, 2922.7, 1752.1, 1725.6, 1637.8, 1610.0, 1468.3, 1432.1, 1366.3, 1351.3, 1280.3, 1270.1, 1260.5, 1219.0, 1188.0, 1146.9, 1124.0, 1070.1, 979.7, 966.8, 945.6, 811.9, 801.2, 760.7, 746.8, 660.7, 640.5, 616.8  $\text{cm}^{-1}$ ; HRMS-ESI calcd. for  $\text{C}_{22}\text{H}_{18}\text{NO}_7$   $[\text{M}+\text{H}]^+$  408.1078, found:408.1084.

**Ethyl 8'-fluoro-2'-hydroxy-1-methyl-2,10'-dioxo-2',3'-dihydro-10'H-spiro [indoline-3,4'-pyrano[3,2-*b*]chromene]-2'-carboxylate 4t**

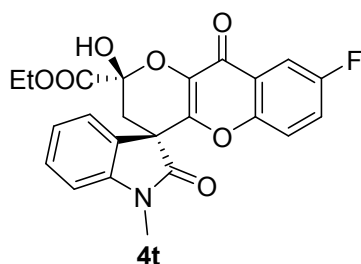

light red solid, melting point: 170–173 °C, 38.5 mg, 88% yield, 93% *ee*, > 20:1 *dr*,  $[\alpha]_{\text{D}}^{25} = +80.2$  ( $c = 0.50$ ,  $\text{CHCl}_3$ ); [Daicel Chiralpak IA, hexane/*i*-PrOH (70:30), flow rate: 1.0  $\text{mL}\cdot\text{min}^{-1}$ ,  $\lambda = 254$  nm,  $t$  (major) = 12.258,  $t$  (minor) = 22.094];  $^1\text{H}$  NMR (400 MHz,  $\text{CDCl}_3$ )  $\delta$  8.81 (s, 0.5H), 7.88 (dd,  $J = 7.6, 0.8$  Hz, 0.5H), 7.84 (dd,  $J = 8.0, 2.8$  Hz, 0.5H), 7.80 (dd,  $J = 8.0, 2.8$  Hz, 0.5H), 7.45 (td,  $J = 7.6, 1.2$  Hz, 0.5H), 7.38 (td,  $J = 7.6, 1.2$  Hz, 0.5H), 7.24 – 7.21 (m, 1.25H), 7.20 – 7.13 (m, 1.25H), 7.11 – 7.06 (m, 1H), 7.04 (d,  $J = 7.6$  Hz, 0.5H), 6.97 (d,  $J = 7.6$  Hz, 0.5H), 5.17 (s, 0.5H), 4.35 (tq,  $J = 14.4, 7.2$  Hz, 2H), 3.36 (d,  $J = 9.6$  Hz, 3H), 3.28 (d,  $J = 14.0$  Hz, 0.5H), 3.05 (d,  $J = 15.2$  Hz, 0.5H), 2.68 (d,  $J = 15.2$  Hz, 0.5H), 2.33 (d,  $J = 14.4$  Hz, 0.5H), 1.37 (dt,  $J = 14.4, 7.2$  Hz, 3H);  $^{13}\text{C}$  NMR (100 MHz,  $\text{CDCl}_3$ )  $\delta$  177.58, 175.35, 171.24, 171.11, 168.33, 167.22, 159.24 ( $J = 245.3$  Hz), 159.17 ( $J = 245.1$  Hz), 151.33, 151.25, 148.05, 145.86, 143.82, 143.73, 136.77, 136.35, 130.33, 129.73, 129.63, 128.63, 127.70, 124.86, 124.84 ( $J = 6.3$  Hz), 124.75 ( $J = 4.6$  Hz), 123.78, 123.48, 120.06 ( $J = 14.6$  Hz), 121.75 ( $J = 14.5$  Hz), 120.26 ( $J = 8.1$  Hz), 120.06 ( $J = 8.0$  Hz), 110.94 ( $J = 27.1$  Hz), 110.70 ( $J = 26.9$  Hz), 109.72, 108.67, 100.09, 94.97, 93.70, 63.75, 62.86, 50.16, 49.57, 37.64, 37.48, 27.44, 27.27, 14.14, 14.08; IR: 3430.1, 2987.5, 1755.6, 1711.6, 1610.3, 1483.3, 1469.4, 1369.7, 1259.8, 1186.1, 1163.3, 1100.0, 1022.9, 994.4, 852.4, 831.0, 799.5, 757.7, 691.1, 642.2  $\text{cm}^{-1}$ ; HRMS-ESI calcd. for  $\text{C}_{23}\text{H}_{19}\text{FNO}_7$   $[\text{M}+\text{H}]^+$  440.1140, found:440.1143.

**Ethyl 8'-bromo-2'-hydroxy-1-methyl-2,10'-dioxo-2',3'-dihydro-10'H-spiro [indoline-3,4'-pyrano[3,2-*b*]chromene]-2'-carboxylate 4u**

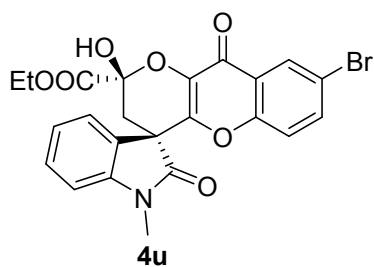

light red solid, melting point: 136–138 °C, 32.5 mg, 65% yield, 92% *ee*, > 20:1 *dr*,  $[\alpha]_{\text{D}}^{25} = + 355.0$  ( $c = 0.61$ ,  $\text{CHCl}_3$ ); [Daicel Chiralpak IA, hexane/*i*-PrOH (70:30), flow rate: 1.0 mL·min<sup>-1</sup>,  $\lambda = 254$  nm,  $t$  (major) = 15.695,  $t$  (minor) = 31.396]; <sup>1</sup>H NMR (400 MHz,  $\text{CDCl}_3$ )  $\delta$  8.82 (s, 0.5H), 8.32 (d,  $J = 2.4$  Hz, 0.5H), 8.27 (d,  $J = 2.0$  Hz, 0.5H), 7.88 (d,  $J = 7.6$  Hz, 0.5H), 7.58 (dt,  $J = 8.8, 2.4$  Hz, 1H), 7.47 – 7.36 (m, 1H), 7.24 – 7.18 (m, 1H), 7.10 – 7.04 (m, 1H), 7.03 (d,  $J = 4.8$  Hz, 0.5H), 6.99 – 6.96 (m, 1H), 5.22 (s, 0.5H), 4.35 (dq,  $J = 7.2, 4.4$  Hz, 2H), 3.36 (d,  $J = 10.0$  Hz, 3H), 3.27 (d,  $J = 14.0$  Hz, 0.5H), 3.05 (d,  $J = 15.2$  Hz, 0.5H), 2.68 (d,  $J = 15.2$  Hz, 0.5H), 2.34 (d,  $J = 14.4$  Hz, 0.5H), 1.36 (dt,  $J = 14.6, 7.1$  Hz, 3H); <sup>13</sup>C NMR (101 MHz,  $\text{CDCl}_3$ )  $\delta$  177.52, 175.27, 170.73, 170.59, 168.29, 167.18, 153.81, 153.75, 148.11, 145.88, 143.81, 143.71, 137.27, 136.81, 136.58, 136.42, 130.36, 129.65, 128.70, 128.53, 128.46, 127.73, 125.00, 124.98, 124.88, 123.80, 123.51, 120.07, 119.87, 118.24, 118.06, 109.73, 108.67, 95.01, 93.73, 63.75, 62.88, 50.15, 49.57, 37.66, 37.46, 27.45, 27.28, 14.15, 14.08; IR: 3331.6, 2926.6, 1741.1, 1723.1, 1626.8, 1606.3, 1467.2, 1418.4, 1352.2, 1242.0, 1227.8, 1098.5, 1074.8, 987.5, 963.1, 835.7, 754.6, 660.7 cm<sup>-1</sup>; HRMS-ESI calcd. for  $\text{C}_{23}\text{H}_{19}\text{BrNO}_7$   $[\text{M}+\text{H}]^+$  500.0339, found:500.0337.

**Ethyl 2'-hydroxy-1,8'-dimethyl-2,10'-dioxo-2',3'-dihydro-10'H-spiro [indoline-3,4'-pyrano[3,2-*b*]chromene]-2'-carboxylate 4v**

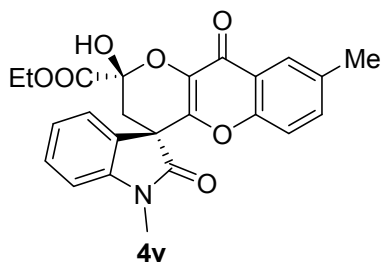

yellow solid, melting point: 106–108 °C, 42.2 mg, 97% yield, 98% *ee*, > 20:1 *dr*,  $[\alpha]_{\text{D}}^{25} = + 52.8$  ( $c = 0.60$ ,  $\text{CHCl}_3$ ); [Daicel Chiralpak IA, hexane/*i*-PrOH (70:30), flow rate: 1.0 mL·min<sup>-1</sup>,  $\lambda = 254$  nm,  $t$  (major) = 19.812,  $t$  (minor) = 41.106]; <sup>1</sup>H NMR (400 MHz,  $\text{CDCl}_3$ )  $\delta$  8.81 (s, 0.5H), 7.97 (dd,  $J = 18.8, 1.2$  Hz, 1H), 7.88 (d,  $J = 7.6$  Hz, 0.5H), 7.43 (td,  $J = 8.0, 1.2$  Hz, 0.5H), 7.36 (td,  $J = 8.0, 1.2$  Hz, 0.5H), 7.32 – 7.29 (m, 1H), 7.21 – 7.14 (m, 1H), 7.07 (dd,  $J = 7.6, 0.8$  Hz, 0.5H), 7.02 (d,  $J = 8.4$  Hz, 1H), 6.97 (d,  $J = 3.2$  Hz, 0.5H), 6.95 (d,  $J = 2.4$  Hz, 0.5H), 5.15 (s, 0.5H), 4.39 (dq,  $J = 16.8, 7.2$  Hz, 2H), 3.35 (d,  $J = 8.4$  Hz, 3H), 3.28 (d,  $J = 14.0$  Hz, 0.5H), 3.04 (d,  $J =$

14.8 Hz, 0.5H), 2.66 (d,  $J = 14.8$  Hz, 0.5H), 2.36 (d,  $J = 5.6$  Hz, 3H), 2.32 (d,  $J = 14.0$  Hz, 0.5H), 1.36 (dt,  $J = 16.8, 7.2$  Hz, 3H);  $^{13}\text{C}$  NMR (101 MHz,  $\text{CDCl}_3$ )  $\delta$  177.74, 175.52, 172.02, 171.88, 168.45, 167.35, 153.37, 153.30, 147.52, 145.35, 143.84, 143.75, 136.96, 136.51, 134.90, 134.77, 134.74, 134.52, 130.17, 129.93, 129.47, 128.85, 127.68, 125.43, 125.18, 124.73, 123.72, 123.37, 117.79, 117.60, 109.62, 108.56, 94.85, 93.63, 63.62, 62.76, 50.15, 49.56, 37.62, 37.51, 27.38, 27.21, 20.86, 14.13, 14.06; IR: 3283.4, 2936.0, 1717.8, 1611.6, 1488.4, 1471.8, 1368.8, 1278.3, 1191.7, 1161.4, 1129.7, 1031.4, 961.7, 692.2, 662.7  $\text{cm}^{-1}$ ; HRMS-ESI calcd. for  $\text{C}_{24}\text{H}_{22}\text{NO}_7$   $[\text{M}+\text{H}]^+$  436.1391, found:436.1381.

**Ethyl2'-hydroxy-7'-methoxy-1-methyl-2,10'-dioxo-2',3'-dihydro-10'H-spiro[indoline-3,4'-pyrano[3,2-b]chromene]-2'-carboxylate 4w**

yellow solid, melting point: 218–220 °C, 44.6 mg, 99% yield, 99% *ee*, > 20:1 *dr*,  $[\alpha]_{\text{D}}^{25} = +43.6$  ( $c = 0.50$ ,  $\text{CHCl}_3$ ); [Daicel Chiralpak IA, hexane/*i*-PrOH (70:30), flow

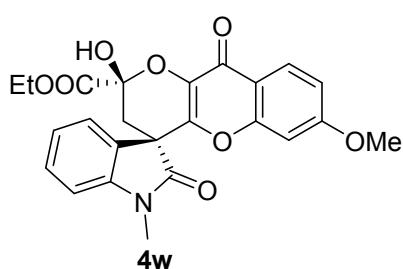

rate: 1.0  $\text{mL}\cdot\text{min}^{-1}$ ,  $\lambda = 254$  nm,  $t$  (major) = 16.022,  $t$  (minor) = 23.611];  $^1\text{H}$  NMR (400 MHz,  $\text{CDCl}_3$ )  $\delta$  8.80 (s, 0.5H), 8.11 (d,  $J = 9.2$  Hz, 0.5H), 8.05 (d,  $J = 8.8$  Hz, 0.5H), 7.92 (d,  $J = 7.2$  Hz, 0.5H), 7.45 (t,  $J = 8.4$  Hz, 0.5H), 7.39 (t,  $J =$

7.2 Hz, 0.5H), 7.24 – 7.17 (m, 1H), 7.11 – 7.04 (m, 1H), 6.98 (d,  $J = 8.0$  Hz, 0.5H), 6.85 (ddd,  $J = 15.6, 8.8, 2.0$  Hz, 1H), 6.49 (d,  $J = 2.4$  Hz, 0.5H), 6.44 (d,  $J = 2.0$  Hz, 0.5H), 5.41 (s, 0.5H), 4.36 (q,  $J = 7.2$  Hz, 2H), 3.77 (s, 3H), 3.37 (d,  $J = 8.0$  Hz, 3H), 3.25 (d,  $J = 14.0$  Hz, 0.5H), 3.04 (d,  $J = 14.8$  Hz, 0.5H), 2.67 (d,  $J = 14.8$  Hz, 0.5H), 2.34 (d,  $J = 14.0$  Hz, 0.5H), 1.37 (dt,  $J = 16.9, 7.1$  Hz, 3H);  $^{13}\text{C}$  NMR (101 MHz,  $\text{CDCl}_3$ )  $\delta$  177.74, 175.61, 171.50, 171.27, 168.44, 167.36, 164.14, 164.03, , 156.86, 156.77, 147.09, 144.90, 143.83, 143.73, 137.00, 136.50, 130.16, 129.94, 129.44, 128.86, 127.77, 127.58, 127.27, 124.75, 123.76, 123.40, 117.60, 117.49, 114.60, 114.49, 109.65, 108.65, 99.92, 94.86, 93.72, 63.52, 62.76, 55.89, 55.85, 50.07, 49.53, 37.76, 37.60, 27.40, 27.24, 14.12, 14.05; IR: 3287.6, 2962.2, 1733.3, 1609.8, 1446.5, 1422.9, 1368.4, 1265.9, 1167.8, 1153.7, 1100.4, 1028.0, 973.5, 833.4, 748.5, 694.1, 635.9  $\text{cm}^{-1}$ ; HRMS-ESI calcd. for  $\text{C}_{24}\text{H}_{22}\text{NO}_8$   $[\text{M}+\text{H}]^+$  452.1340, found:452.1343.

### 3.2 Synthesis of compounds 6a–6t

**General procedure:** In an ordinary tube equipped with a magnetic stirring bar, the solution of **5** (0.12 mmol, 1.2 equiv), catalyst **1h** (2.5 mg, 5 mol %, 0.05 equiv) in DCM (0.5 mL) was stirred at rt. for 30 min, and then **3** (0.1 mmol, 1 equiv) was added. The reaction was stirred under rt. for 12 h, the reaction mixture was directly loaded onto a silica gel and purified by flash chromatography (eluent: petroleum ether/DCM = 1:1 – 0:1) to give desired products **6a–6t**.

**A specific procedure for synthesis of compound 6a:** In an ordinary tube equipped with a magnetic stirring bar, the solution of **5a** (20.9 mg, 0.15 mmol, 1.5 equiv), catalyst **1h** (2.5 mg, 5 mol %, 0.05 equiv) in DCM (0.5 mL) was stirred at rt. for 30 min, and then **3a** (25.9 mg, 0.1 mmol, 1 equiv) was added. The reaction was stirred under rt. for 40 h, the reaction mixture was directly loaded onto a silica gel and purified by flash chromatography (eluent: petroleum ether/ethyl acetate = 1.5:1) to give desired products **6a**.

#### Ethyl-2-hydroxy-1'-methyl-2',5,10-trioxo-2,3,5,10-

#### tetrahydrospiro[benzo[g]chromene-4,3'-indoline]-2-carboxylate **6a**

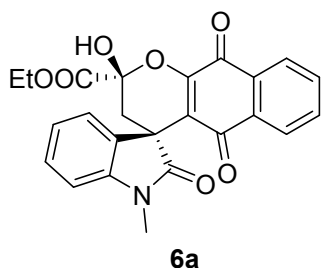

**6a**

foamy solid, 35.1 mg, 81% yield; 98% *ee*, > 20/1 *dr*,  $[\alpha]_{\text{D}}^{26}$  = – 36.01 (*c* = 1.43, CH<sub>2</sub>Cl<sub>2</sub>); [Daicel Chiralpak IA, hexane/*i*-PrOH (75:25), flow rate: 1.0 mL·min<sup>-1</sup>,  $\lambda$  = 254 nm, *t* (major) = 17.981, *t* (minor) = 22.054]; <sup>1</sup>H (400 Hz, CDCl<sub>3</sub>):  $\delta$  9.17 (s, 0.6H), 8.13 – 8.07 (m, 1H), 7.87 – 7.81 (m, 1H), 7.70 – 7.59 (m, 3H), 7.38 – 7.29 (m, 1H), 7.10 – 7.05 (m, 1H), 7.01 – 6.94 (m, 1H), 5.29 (s, 0.4H), 4.37 (q, *J* = 8.0 Hz, 2H), 3.39 (s, 1.85H), 3.38 (s, 1.15H), 3.03 (dd, *J* = 8.0, 4.0 Hz, 0.35H), 2.80 (d, *J* = 16.0 Hz, 0.65H), 2.56 (d, *J* = 16.0 Hz, 0.65H), 2.17 (d, *J* = 16.0 Hz, 0.35H), 1.38 (t, *J* = 8.0 Hz, 1.8H), 1.35 (t, *J* = 8.0 Hz, 1.2H); <sup>13</sup>C NMR (101 MHz, CDCl<sub>3</sub>)  $\delta$  182.36, 179.70, 178.88, 178.66, 178.53, 168.29, 166.81, 155.24, 154.13, 143.94, 143.83, 134.47, 134.40, 133.78, 133.61, 132.08, 131.55, 131.50, 130.93, 130.87, 129.62, 128.85, 126.82, 126.69, 126.62, 126.53, 124.22, 122.36, 122.26, 121.75, 120.83, 109.42, 108.50, 97.10, 95.12, 64.15, 63.00, 46.82, 45.59, 37.46, 36.72, 27.24, 27.17, 14.16, 14.07; IR: 3431.3, 1751.2,

1714.3, 1682.4, 1611.4, 1384.3, 1273.2, 1140.0, 1047.0, 974.3, 755.5, 723.2, 684.6, 543.0, 416.1  $\text{cm}^{-1}$ ; HRMS-ESI: calcd. for  $\text{C}_{24}\text{H}_{20}\text{NO}_7$   $[\text{M}+\text{H}]^+$  434.1234, found: 434.1241.

**Ethyl-2-hydroxy-1'-(methoxymethyl)-2',5,10-trioxo-2,3,5,10-tetrahydrospiro[benzo[g]chromene-4,3'-indoline]-2-carboxylate 6b**

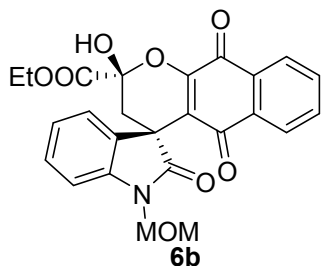

foamy solid, 31.0 mg, 67% yield; 97% *ee*, > 20/1 *dr*,  $[\alpha]_{\text{D}}^{26} = -15.84$  ( $c = 1.19$ ,  $\text{CH}_2\text{Cl}_2$ ); [Daicel Chiralpak OD-H, hexane/*i*-PrOH (70:30), flow rate: 1.0  $\text{mL}\cdot\text{min}^{-1}$ ,  $\lambda = 254$  nm,  $t$  (major) = 16.117,  $t$  (minor) = 7.124];  $^1\text{H}$  (400 Hz,  $\text{CDCl}_3$ ):  $\delta$  8.83 (s, 0.6H), 8.14 – 8.07 (m, 1H), 7.88 – 7.83 (m, 1H), 7.71 – 7.69 (m, 0.5H), 7.68 – 7.62 (m, 2H), 7.38 – 7.28 (m, 1H), 7.22 – 7.15 (m, 1H), 7.12 – 7.07 (m, 1H), 7.02 – 6.98 (m, 0.5H), 5.32 (s, 0.4H), 5.30 – 5.22 (m, 2H), 4.37 (q,  $J = 8.0$  Hz, 2H), 3.52 (s, 1.4H), 3.49 (s, 1.6H), 3.02 (d,  $J = 16.0$  Hz, 0.5H), 2.82 (d,  $J = 16.0$  Hz, 0.5H), 2.58 (d,  $J = 16.0$  Hz, 0.55H), 2.22 (d,  $J = 16.0$  Hz, 0.45H), 1.39 (t,  $J = 8.0$  Hz, 1.55H), 1.35 (t,  $J = 8.0$  Hz, 1.45H);  $^{13}\text{C}$  NMR (101 MHz,  $\text{CDCl}_3$ ):  $\delta$  182.34, 182.25, 180.72, 179.18, 178.86, 178.58, 168.17, 166.69, 155.19, 154.16, 142.19, 142.13, 134.51, 134.44, 133.84, 133.65, 131.60, 131.53, 131.52, 131.05, 130.94, 130.87, 129.49, 128.93, 126.91, 126.86, 126.75, 126.65, 126.63, 124.61, 122.82, 122.33, 121.64, 120.76, 110.86, 109.94, 96.95, 95.16, 72.41, 72.30, 64.18, 63.09, 57.05, 56.78, 47.11, 45.99, 37.93, 37.08, 14.15, 14.08; IR: 3411.4, 2935.3, 1750.6, 1722.1, 1684.0, 1655.7, 1594.9, 1467.8, 1300.9, 1202.5, 1133.1, 1044.3, 975.6, 952.3, 756.3, 724.5, 684.1  $\text{cm}^{-1}$ ; HRMS-ESI: calcd. for  $\text{C}_{25}\text{H}_{22}\text{NNaO}_8$   $[\text{M}+\text{H}]^+$  486.1159, found: 464.1148.

**Ethyl-1'-benzyl-2-hydroxy-2',5,10-trioxo-2,3,5,10-tetrahydrospiro[benzo[g]chromene-4,3'-indoline]-2-carboxylate 6c**

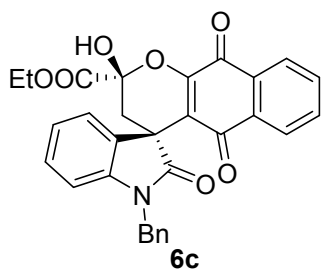

foamy solid, 26.5 mg, 52% yield; 97% *ee*, > 20/1 *dr*,  $[\alpha]_{\text{D}}^{26} = -27.12$  ( $c = 2.05$ ,  $\text{CH}_2\text{Cl}_2$ ); [Daicel Chiralpak IA, hexane/*i*-PrOH (70:30), flow rate: 1.0  $\text{mL}\cdot\text{min}^{-1}$ ,  $\lambda = 254$  nm,  $t$  (major) = 26.256,  $t$  (minor) = 24.481];  $^1\text{H}$  (400 Hz,  $\text{CDCl}_3$ ):  $\delta$  9.14 (s, 0.6H), 8.16 – 8.08 (m, 1H), 7.94 – 7.85

(m, 1H), 7.72 – 7.69 (m, 0.4H), 7.68 – 7.64 (m, 2H), 7.49 – 7.46 (m, 2H), 7.41 – 7.36 (m, 2H), 7.34 – 7.28 (m, 1H), 7.25 – 7.15 (m, 1H), 7.08 – 7.06 (m, 0.6H), 7.05 – 6.92 (m, 1H), 6.87 – 6.77 (m, 1H), 5.29 (s, 0.4H), 5.18 – 5.00 (m, 2H), 4.39 (q,  $J = 8.0$  Hz, 2H), 3.12 – 3.08 (m, 0.4H), 2.85 (d,  $J = 16.0$  Hz, 0.6H), 2.59 (d,  $J = 16.0$  Hz, 0.6H), 2.24 (d,  $J = 16.0$  Hz, 0.4H), 1.40 (t,  $J = 8.0$  Hz, 1.8H), 1.37 (t,  $J = 8.0$  Hz, 1.2H);  $^{13}\text{C}$  NMR (101 MHz,  $\text{CDCl}_3$ ): 182.26, 180.01, 178.89, 178.65, 178.63, 168.26, 166.80, 155.29, 154.24, 143.01, 142.92, 135.87, 134.86, 134.48, 134.41, 133.78, 133.62, 132.18, 131.57, 131.48, 130.94, 130.89, 129.22, 129.11, 128.93, 128.68, 128.10, 127.70, 127.49, 127.36, 126.84, 126.81, 126.78, 126.66, 126.62, 124.24, 122.34, 122.26, 121.67, 120.71, 110.51, 109.65, 97.08, 95.18, 64.21, 63.06, 46.85, 45.71, 44.90, 44.67, 37.79, 37.06, 14.17, 14.09; IR: 3415.8, 2983.5, 1750.6, 1712.6, 1682.6, 1655.3, 1357.6, 1333.3, 1221.7, 1155.1, 1027.7, 949.1, 855.9, 830.0, 793.1, 754.0, 723.3, 697.2, 476.4  $\text{cm}^{-1}$ ; HRMS-ESI: calcd. for  $\text{C}_{30}\text{H}_{24}\text{NO}_7$   $[\text{M}+\text{H}]^+$  510.1547, found: 510.1562.

**Ethyl-1'-allyl-2-hydroxy-2',5,10-trioxo-2,3,5,10-tetrahydrospiro[benzo[g]chromene-4,3'-indoline]-2-carboxylate 6d**

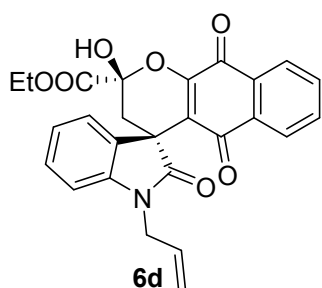

foamy solid, 32.1 mg, 70% yield; 96% *ee*, > 20/1 *dr*,  $[\alpha]_{\text{D}}^{26} = -40.95$  ( $c = 1.36$ ,  $\text{CH}_2\text{Cl}_2$ ); [Daicel Chiralpak IA, hexane/*i*-PrOH (70:30), flow rate: 1.0  $\text{mL} \cdot \text{min}^{-1}$ ,  $\lambda = 254$  nm,  $t$  (major) = 16.315,  $t$  (minor) = 14.892];  $^1\text{H}$  (400 Hz,  $\text{CDCl}_3$ ):  $\delta$  9.10 (s, 0.6H), 8.13 – 8.07 (m, 1H), 7.89 – 7.83 (m, 1H), 7.70 – 7.68 (m, 0.4H), 7.67 – 7.62 (m, 2H), 7.35 – 7.24 (m, 1H), 7.07 – 6.98 (m, 2H), 6.96 – 6.93 (m, 0.6H), 6.04 – 5.91 (m, 1H), 5.53 – 5.45 (m, 1H), 5.36 – 5.29 (m, 1H), 5.17 (s, 0.4H), 4.59 – 4.41 (m, 2H), 4.40 – 4.35 (m, 2H), 3.06 – 3.02 (m, 0.4H), 2.81 (d,  $J = 16.0$  Hz, 0.6H), 2.56 (d,  $J = 16.0$  Hz, 0.6H), 2.18 (d,  $J = 16.0$  Hz, 0.4H), 1.39 (t,  $J = 8.0$  Hz, 1.8H), 1.35 (t,  $J = 8.0$  Hz, 1.2H);  $^{13}\text{C}$  NMR (101 MHz,  $\text{CDCl}_3$ ):  $\delta$  182.24, 179.61, 178.90, 178.66, 178.27, 168.28, 166.81, 155.24, 154.16, 143.05, 142.97, 134.46, 134.38, 133.76, 133.59, 132.15, 131.56, 131.52, 130.93, 130.88, 130.46, 129.22, 128.67, 126.85, 126.80, 126.77, 126.63, 126.60, 124.18,



122.29, 121.72, 120.76, 118.62, 117.90, 110.33, 109.49, 97.06, 95.13, 64.18, 63.03, 46.81, 45.62, 43.32, 43.20, 37.68, 36.95, 14.16, 14.08; IR: 3412.3, 2984.3, 2925.6, 1750.3, 1655.8, 1435.0, 1333.2, 1271.9, 1201.5, 1046.3, 969.1, 948.1, 793.0, 755.3, 724.0, 683.9  $\text{cm}^{-1}$ ; HRMS-ESI: calcd. for  $\text{C}_{26}\text{H}_{22}\text{NO}_7$   $[\text{M}+\text{H}]^+$  460.1391, found: 460.1404.

**1'-benzyl-2-ethyl-2-hydroxy-2',5,10-trioxo-2,3,5,10-tetrahydrospiro[benzo[g]chromene-4,3'-indoline]-1',2-dicarboxylate 6e**

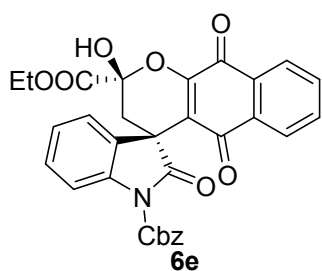

foamy solid, 32.7 mg, 59% yield; 97% *ee*, > 20/1 *dr*,  $[\alpha]_{\text{D}}^{26} = -29.64$  ( $c = 1.28$ ,  $\text{CH}_2\text{Cl}_2$ ); [Daicel Chiralpak IA, hexane/*i*-PrOH (70:30), flow rate: 1.0  $\text{mL}\cdot\text{min}^{-1}$ ,  $\lambda = 254$  nm,  $t$  (major) = 26.872,  $t$  (minor) = 24.448];  $^1\text{H}$  (400 Hz,  $\text{CDCl}_3$ ):  $\delta$  9.14 (s, 0.6H), 8.14 – 8.08 (m, 1H), 7.91 – 7.86 (m, 1H), 7.71 – 7.64 (m, 2.45H), 7.48 – 7.45 (m, 2H), 7.41 – 7.36 (m, 2H), 7.34 – 7.28 (m, 1H), 7.25 – 7.15 (m, 1H), 7.08 – 7.06 (m, 0.55H), 7.05 – 6.91 (m, 1H), 6.87 – 6.77 (m, 1H), 5.19 (s, 0.4H), 5.16 – 5.00 (m, 2H), 4.38 (q,  $J = 8.0$  Hz, 2H), 3.09 (d,  $J = 16.0$  Hz, 0.4H), 2.84 (d,  $J = 16.0$  Hz, 0.6H), 2.59 (d,  $J = 16.0$  Hz, 0.6H), 2.24 (d,  $J = 16.0$  Hz, 0.4H), 1.42 – 1.35 (m, 3H);  $^{13}\text{C}$  NMR (101 MHz,  $\text{CDCl}_3$ ):  $\delta$  182.26, 180.01, 178.90, 178.66, 178.63, 168.27, 166.80, 155.29, 154.25, 143.01, 142.92, 135.88, 134.87, 134.48, 134.41, 133.79, 133.62, 132.18, 131.57, 131.49, 130.95, 130.89, 129.22, 129.11, 128.93, 128.69, 128.10, 127.71, 127.49, 127.36, 126.84, 126.82, 126.79, 126.66, 126.62, 124.24, 122.35, 122.26, 121.67, 120.71, 110.51, 109.66, 97.08, 95.19, 64.21, 63.07, 46.85, 45.72, 44.91, 44.67, 37.80, 37.07, 14.17, 14.09; IR: 3415.8, 2925.4, 2853.2, 1750.3, 1712.9, 1682.3, 1271.1, 1155.0, 1046.5, 1027.7, 1011.3, 948.2, 830.1, 753.8, 723.2, 697.4, 553.1, 455.2  $\text{cm}^{-1}$ ; HRMS-ESI: calcd. for  $\text{C}_{31}\text{H}_{24}\text{NO}_9$   $[\text{M}+\text{H}]^+$  554.1446, found: 554.1426.

**Ethyl-1'-acetyl-2-hydroxy-2',5,10-trioxo-2,3,5,10-tetrahydrospiro[benzo[g]chromene-4,3'-indoline]-2-carboxylate 6f**

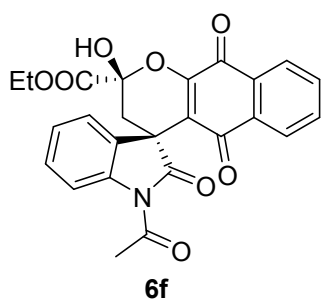

foamy solid, 25.8 mg, 56% yield; 97% *ee*, > 20/1 *dr*,  $[\alpha]_{\text{D}}^{26} = -3.82$  ( $c = 1.02$ ,  $\text{CH}_2\text{Cl}_2$ ); [Daicel Chiralpak IA, hexane/*i*-PrOH (70:30), flow rate: 1.0  $\text{mL}\cdot\text{min}^{-1}$ ,  $\lambda = 254$

nm, t (major) = 14.311, t (minor) = 12.719];  $^1\text{H}$  (400 Hz,  $\text{CDCl}_3$ ):  $\delta$  8.34 – 8.29 (m, 1H), 8.15 – 8.10 (m, 1H), 7.89 – 7.84 (m, 1.2H), 7.73 – 7.65 (m, 2.8H), 7.40 – 7.32 (m, 1H), 7.18 – 7.08 (m, 1.3H), 5.25 (s, 0.7H), 4.42 – 4.36 (m, 2H), 3.00 (d,  $J = 16.0$  Hz, 0.7H), 2.83 (d,  $J = 16.0$  Hz, 0.3H), 2.74 (s, 2.2H), 2.73 (s, 1H), 2.32 (d,  $J = 16.0$  Hz, 0.8H), 1.41 – 1.36 (m, 3H);  $^{13}\text{C}$  NMR (101 MHz,  $\text{CDCl}_3$ ):  $\delta$  182.37, 179.55, 178.69, 171.05, 167.93, 154.14, 140.11, 134.69, 134.64, 134.12, 133.92, 131.32, 131.28, 130.84, 130.28, 129.76, 129.19, 127.02, 126.84, 126.72, 126.49, 126.29, 124.87, 122.04, 121.70, 117.25, 116.59, 96.54, 95.11, 64.38, 63.34, 46.34, 38.73, 37.45, 26.98, 14.16, 14.11; IR: 3416.5, 2985.1, 1753.6, 1713.9, 1654.5, 1594.9, 1580.1, 1336.1, 1272.4, 1227.5, 1040.9, 956.1, 917.2, 830.1, 794.2, 721.1, 684.6,  $530.5\text{ cm}^{-1}$ ; HRMS-ESI:  $^+$  calcd. for  $\text{C}_{25}\text{H}_{20}\text{NO}_8$   $[\text{M}+\text{H}]$  462.1183, found: 462.1196.

**Ethyl-5'-fluoro-2-hydroxy-1'-methyl-2',5,10-trioxo-2,3,5,10-tetrahydrospiro[benzo[g]chromene-4,3'-indoline]-2-carboxylate 6g**

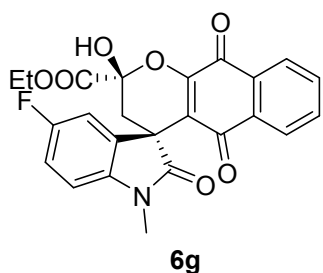

foamy solid, 31.5 mg, 70% yield; 97% *ee*, > 20/1 *dr*,  $[\alpha]_{\text{D}}^{26} = -14.28$  ( $c = 1.08$ ,  $\text{CH}_2\text{Cl}_2$ ); [Daicel Chiralpak IA, hexane/*i*-PrOH (70:30), flow rate:  $1.0\text{ mL}\cdot\text{min}^{-1}$ ,  $\lambda = 254\text{ nm}$ , t (major) = 13.975, t (minor) = 10.650];  $^1\text{H}$  (400 Hz,  $\text{CDCl}_3$ ):  $\delta$  9.12 (s, 0.55H), 8.17 – 8.10 (m, 1H), 7.91 – 7.85 (m, 1H), 7.74 – 7.65 (m, 2H), 7.48 – 7.45 (m, 0.55H), 7.11 – 7.01 (m, 1H), 6.97 – 6.94 (m, 0.45H), 6.90 – 6.84 (m, 1H), 5.24 (s, 0.45H), 4.40 (q,  $J = 8.0$  Hz, 2H), 3.40 (s, 1.4H), 3.38 (s, 1.6H), 3.05 (d,  $J = 16.0$  Hz, 0.5H), 2.78 (d,  $J = 16.0$  Hz, 0.5H), 2.59 (d,  $J = 16.0$  Hz, 0.5H), 2.19 (d,  $J = 16.0$  Hz, 0.5H), 1.42 (t,  $J = 8.0$  Hz, 1.3H), 1.38 (t,  $J = 8.0$  Hz, 1.7H);  $^{13}\text{C}$  NMR (101 MHz,  $\text{CDCl}_3$ ):  $\delta$  182.41, 182.36, 179.43, 178.75, 178.50, 178.21, 168.08, 166.67, 160.03 ( $J = 242$  Hz), 158.89 ( $J = 267$  Hz), 155.40, 154.20, 140.01, 140.00, 139.77, 139.75, 134.55 ( $J = 8$  Hz), 133.94, 133.76, 131.48, 130.90 ( $J = 6$  Hz), 126.94, 126.72 ( $J = 1$  Hz), 126.56, 121.38, 121.31, 120.23, 115.61 ( $J = 24$  Hz), 115.23 ( $J = 25$  Hz), 115.06 ( $J = 24$  Hz), 110.84, 110.59, 110.08, 110.00, 108.81, 108.72, 97.03, 95.03, 64.25, 63.11, 47.08, 45.90, 37.29, 36.55, 27.41, 27.34, 14.17, 14.08; IR: 3424.4, 2926.6, 1750.7, 1714.4, 1683.0, 1656.5, 1620.2, 1594.0, 1333.5, 1269.3, 1119.0, 959.6, 920.2, 876.6, 817.2, 720.7, 622.7,  $502.3\text{ cm}^{-1}$ ; HRMS-

ESI: calcd. for C<sub>24</sub>H<sub>19</sub>FNO<sub>7</sub> [M+H]<sup>+</sup> 452.1140, found: 452.1136.

**Ethyl-5'-chloro-2-hydroxy-1'-methyl-2',5,10-trioxo-2,3,5,10-tetrahydrospiro[benzo[g]chromene-4,3'-indoline]-2-carboxylate 6h**

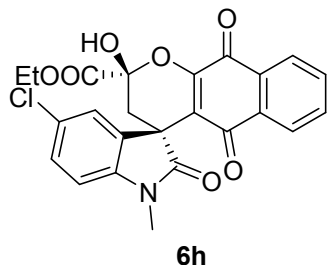

foamy solid, 41.1 mg, 88% yield; 97% *ee*, > 20/1 *dr*, [α]<sub>D</sub><sup>26</sup> = -22.49 (c = 1.44, CH<sub>2</sub>Cl<sub>2</sub>); [Daicel Chiralpak IA, hexane/*i*-PrOH (70:30), flow rate: 1.0 mL·min<sup>-1</sup>, λ = 254 nm, t (major) = 14.660, t (minor) = 8.947]; <sup>1</sup>H (400 Hz, CDCl<sub>3</sub>): δ 8.99 (s, 0.4H), 8.15 – 8.08 (m, 1H), 7.88 – 7.83 (m, 1H), 7.73 – 7.70 (m, 0.5H), 7.69 – 7.64 (m, 2H), 7.35 – 7.27 (m, 1.2H), 7.06 – 7.05 (m, 0.5H), 6.95 – 6.87 (m, 1H), 5.32 (s, 0.4H), 4.38 (q, *J* = 8.0 Hz, 2H), 3.38 (s, 1.4H), 3.36 (s, 1.6H), 3.01 (d, *J* = 16.0 Hz, 0.55H), 2.77 (d, *J* = 16.0 Hz, 0.45H), 2.57 (d, *J* = 16.0 Hz, 0.45H), 2.18 (d, *J* = 16.0 Hz, 0.55H), 1.40 (t, *J* = 8.0 Hz, 1.4H), 1.35 (t, *J* = 8.0 Hz, 1.6H); <sup>13</sup>C NMR (101 MHz, CDCl<sub>3</sub>): δ 182.35, 179.56, 178.93, 178.69, 178.44, 168.31, 166.85, 155.18, 154.06, 141.52, 141.37, 134.43, 134.36, 133.95, 133.73, 133.55, 132.04, 131.77, 131.55, 130.92, 130.85, 129.58, 129.09, 127.61, 126.77, 126.71, 126.56, 123.09, 121.88, 120.94, 109.13, 108.18, 97.10, 95.16, 64.06, 62.96, 46.83, 45.67, 37.56, 36.77, 27.24, 27.17, 21.31, 21.23, 14.14, 14.05; IR: 3431.7, 2926.0, 1751.0, 1718.9, 1683.4, 1654.9, 1384.3, 1106.2, 989.3, 976.4, 728.9, 630.6, 518.5, 475.2, 416.8 cm<sup>-1</sup>; HRMS-ESI: calcd. for C<sub>24</sub>H<sub>19</sub>ClNO<sub>7</sub> [M+H]<sup>+</sup> 468.0845, found: 468.0842.

**Ethyl-5'-bromo-2-hydroxy-1'-methyl-2',5,10-trioxo-2,3,5,10-tetrahydrospiro[benzo[g]chromene-4,3'-indoline]-2-carboxylate 6i**

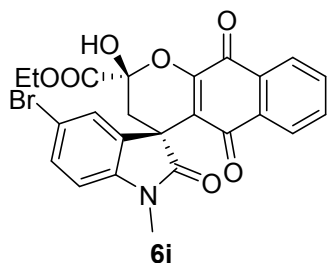

foamy solid, 47.1 mg, 92% yield; 97% *ee*, > 20/1 *dr*, [α]<sub>D</sub><sup>26</sup> = -27.45 (c = 1.51, CH<sub>2</sub>Cl<sub>2</sub>); [Daicel Chiralpak IA, hexane/*i*-PrOH (70:30), flow rate: 1.0 mL·min<sup>-1</sup>, λ = 254 nm, t (major) = 15.113, t (minor) = 9.027]; <sup>1</sup>H (400 Hz, CDCl<sub>3</sub>): δ 8.95 (s, 0.5H), 8.12 – 8.05 (m, 1H), 7.86 – 7.81 (m, 1H), 7.78 – 7.77 (m, 0.55H), 7.69 – 7.64 (m, 2H), 7.48 – 7.40 (m, 1H), 7.18 – 7.17 (m, 0.45H), 6.89 – 6.81 (m, 1H), 5.40 (s, 0.5H), 4.39 – 4.33 (m, 2H), 3.36 (s, 1.3H), 3.34 (s, 1.7H), 2.98 (d, *J* = 16.0 Hz, 0.6H), 2.76 (d, *J* = 16.0 Hz, 0.4H), 2.56 (d,

$J = 16.0$  Hz, 0.4H), 2.17 (d,  $J = 16.0$  Hz, 0.6H), 1.38 (t,  $J = 8.0$  Hz, 1.3H), 1.33 (t,  $J = 8.0$  Hz, 1.7H);  $^{13}\text{C}$  NMR (101 MHz,  $\text{CDCl}_3$ ):  $\delta$  182.36, 182.32, 179.18, 178.69, 178.41, 177.97, 167.94, 166.60, 155.32, 154.19, 143.05, 142.87, 134.56, 134.47, 133.99, 133.91, 133.72, 133.33, 132.17, 131.59, 131.40, 131.38, 130.87, 130.79, 130.05, 126.88, 126.67, 126.66, 126.57, 125.58, 121.16, 120.13, 116.73, 115.10, 110.80, 109.86, 96.93, 95.06, 64.12, 63.10, 46.73, 45.61, 37.24, 36.56, 27.32, 27.24, 14.12, 14.04.; IR: 3440.0, 2924.8, 1718.1, 1682.4, 1654.7, 1621.9, 1465.7, 1332.3, 1202.3, 1105.0, 975.7, 953.8, 797.1, 724.8, 689.4, 614.8, 538.8, 418.6  $\text{cm}^{-1}$ ; HRMS-ESI: calcd. for  $\text{C}_{24}\text{H}_{19}\text{BrNO}_7$   $[\text{M}+\text{H}]^+$  512.0339, found: 512.0328.

**Ethyl-2-hydroxy-1',5'-dimethyl-2',5,10-trioxo-2,3,5,10-tetrahydrospiro[benzo[g]chromene-4,3'-indoline]-2-carboxylate 6j**

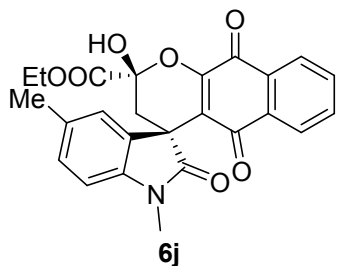

foamy solid, 38.9 mg, 87% yield; 97% *ee*, > 20/1 *dr*,  $[\alpha]_{\text{D}}^{26} = -50.50$  ( $c = 1.67$ ,  $\text{CH}_2\text{Cl}_2$ ); [Daicel Chiralpak IA, hexane/*i*-PrOH (70:30), flow rate: 1.0  $\text{mL}\cdot\text{min}^{-1}$ ,  $\lambda = 254$  nm,  $t$  (major) = 11.020,  $t$  (minor) = 7.396];  $^1\text{H}$  (400 Hz,  $\text{CDCl}_3$ ):  $\delta$  9.23 (s, 0.7H), 8.12 – 8.06 (m, 1H), 7.86 – 7.82

(m, 1H), 7.69 – 7.62 (m, 2H), 7.15 – 7.09 (m, 1H), 6.90 – 6.83 (m, 2H), 5.29 (s, 0.3H), 4.37 (q,  $J = 8.0$  Hz, 2H), 3.36 (s, 2H), 3.35 (s, 1H), 3.01 (d,  $J = 16.0$  Hz, 0.3H), 2.78 (d,  $J = 16.0$  Hz, 0.7H), 2.54 (d,  $J = 16.0$  Hz, 0.7H), 2.26 (s, 2H), 2.25 (s, 1H), 2.16 (d,  $J = 16.0$  Hz, 0.3H), 1.38 (t,  $J = 8.0$  Hz, 2H), 1.34 (t,  $J = 8.0$  Hz, 1H);  $^{13}\text{C}$  NMR (101 MHz,  $\text{CDCl}_3$ ):  $\delta$  182.40, 182.36, 179.32, 178.75, 178.46, 178.10, 168.01, 166.63, 155.37, 154.22, 142.60, 142.40, 134.59, 134.51, 133.95, 133.77, 133.72, 132.98, 131.45, 131.43, 130.92, 130.85, 129.56, 129.31, 128.74, 127.77, 127.40, 126.94, 126.73, 126.70, 126.60, 122.90, 121.23, 120.18, 110.34, 109.35, 96.97, 95.05, 64.21, 63.13, 46.84, 45.69, 37.27, 36.56, 27.38, 27.30, 14.16, 14.07; IR: 3410.4, 2925.3, 1749.9, 1721.9, 1682.4, 1618.5, 1333.2, 1271.5, 1104.2, 976.8, 913.2, 871.4, 721.3, 628.8, 530.1, 470.1  $\text{cm}^{-1}$ ; HRMS-ESI: calcd. for  $\text{C}_{25}\text{H}_{22}\text{NO}_7$   $[\text{M}+\text{H}]^+$  448.1391, found: 448.1382.

**Ethyl-2-hydroxy-5'-methoxy-1'-methyl-2',5,10-trioxo-2,3,5,10-tetrahydrospiro[benzo[g]chromene-4,3'-indoline]-2-carboxylate 6k**

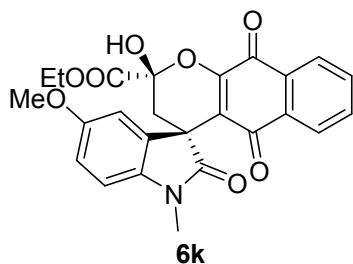

foamy solid, 33.3 mg, 72% yield; 97% *ee*, > 20/1 *dr*,  $[\alpha]_D^{26} = -37.09$  ( $c = 1.41$ ,  $\text{CH}_2\text{Cl}_2$ ); [Daicel Chiralpak IA, hexane/*i*-PrOH (70:30), flow rate:  $1.0 \text{ mL} \cdot \text{min}^{-1}$ ,  $\lambda = 254 \text{ nm}$ ,  $t$  (major) = 13.584,  $t$  (minor) = 11.840];  $^1\text{H}$  (400 Hz,  $\text{CDCl}_3$ ):  $\delta$  9.29 (s, 0.6H), 8.13 – 8.06 (m, 1H), 7.88 – 7.82 (m, 1H), 7.70 – 7.61 (m, 2H), 7.32 – 7.31 (m, 0.3H), 6.92 – 6.83 (m, 2H), 6.67 – 6.66 (m, 0.7H), 5.21 (s, 0.4H), 4.37 (q,  $J = 8.0 \text{ Hz}$ , 2H), 3.72 (s, 2H), 3.71 (s, 1H), 3.36 (s, 2H), 3.35 (s, 1H), 3.03 (d,  $J = 16.0 \text{ Hz}$ , 0.3H), 2.77 (d,  $J = 16.0 \text{ Hz}$ , 0.7H), 2.56 (d,  $J = 16.0 \text{ Hz}$ , 0.65H), 2.17 (d,  $J = 16.0 \text{ Hz}$ , 0.35H), 1.38 (t,  $J = 8.0 \text{ Hz}$ , 2H), 1.34 (t,  $J = 8.0 \text{ Hz}$ , 1H);  $^{13}\text{C}$  NMR (101 MHz,  $\text{CDCl}_3$ ):  $\delta$  182.40, 182.34, 179.26, 178.90, 178.70, 178.13, 168.29, 166.86, 157.12, 155.65, 155.26, 154.10, 137.48, 137.08, 134.48, 134.41, 133.78, 133.62, 133.41, 132.82, 131.56, 130.94, 130.87, 126.82, 126.71, 126.62, 126.57, 120.80, 114.43, 113.32, 113.09, 109.84, 109.73, 108.65, 97.14, 95.12, 64.17, 63.01, 55.86, 55.80, 47.15, 45.95, 37.60, 36.63, 27.32, 27.26, 14.16, 14.07; IR: 3427.6, 2937.4, 1751.1, 1710.3, 1682.1, 1656.3, 1618.4, 1579.5, 1273.2, 1156.4, 976.7, 956.2, 872.1, 800.3, 760.2, 721.0, 693.9, 529.9  $\text{cm}^{-1}$ ; HRMS-ESI: calcd. for  $\text{C}_{25}\text{H}_{22}\text{NO}_8$   $[\text{M}+\text{H}]^+$  464.1340, found: 464.1326.

**Ethyl-6'-chloro-2-hydroxy-1'-methyl-2',5,10-trioxo-2,3,5,10-tetrahydrospiro[benzo[g]chromene-4,3'-indoline]-2-carboxylate 6l**

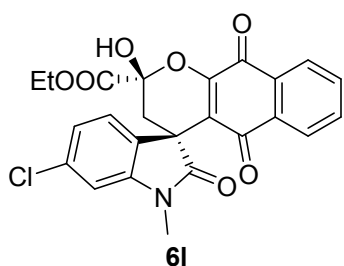

foamy solid, 32.3 mg, 69% yield; 97% *ee*, > 20/1 *dr*,  $[\alpha]_D^{26} = -6.56$  ( $c = 1.70$ ,  $\text{CH}_2\text{Cl}_2$ ); [Daicel Chiralpak IA, hexane/*i*-PrOH (80:20), flow rate:  $1.0 \text{ mL} \cdot \text{min}^{-1}$ ,  $\lambda = 210 \text{ nm}$ ,  $t$  (major) = 34.813,  $t$  (minor) = 32.136];  $^1\text{H}$  (400 Hz,  $\text{CDCl}_3$ ):  $\delta$  8.93 (s, 0.4H), 8.12 – 8.05 (m, 1H), 7.87 – 7.81 (m, 1H), 7.71 – 7.62 (m, 2H), 7.58 – 7.54 (m, 0.6H), 7.06 – 7.03 (m, 0.4H), 7.00 – 6.92 (m, 2H), 5.28 (s, 0.6H), 4.37 (q,  $J = 8.0 \text{ Hz}$ , 2H), 3.37 (s, 1H), 3.35 (s, 2H), 2.99 (d,  $J = 16.0 \text{ Hz}$ , 0.6H), 2.76 (d,  $J = 16.0 \text{ Hz}$ , 0.4H), 2.55 (d,  $J = 16.0 \text{ Hz}$ , 0.4H), 2.14 (d,  $J = 16.0 \text{ Hz}$ , 0.6H), 1.38 (t,  $J = 8.0 \text{ Hz}$ , 1.2H), 1.34 (t,  $J = 8.0 \text{ Hz}$ , 1.8H);  $^{13}\text{C}$  NMR (101 MHz,  $\text{CDCl}_3$ ):  $\delta$  182.39, 182.37, 179.76, 178.74, 178.51, 178.50, 168.10, 166.66, 155.31, 154.17, 145.19, 145.00, 135.17, 134.63, 134.58, 134.50, 133.92,

133.74, 131.43, 130.89, 130.82, 130.38, 129.79, 127.88, 126.90, 126.87, 126.68, 126.52, 124.04, 123.20, 122.23, 121.30, 120.86, 120.35, 110.29, 109.23, 96.99, 95.07, 64.20, 63.10, 46.47, 45.25, 37.26, 36.66, 27.36, 27.28, 14.14, 14.06; IR: 3423.7, 2926.4, 1750.8, 1720.8, 1656.3, 1620.8, 1607.3, 1333.3, 1302.7, 1161.4, 977.8, 717.9, 688.9, 590.1, 481.4  $\text{cm}^{-1}$ ; HRMS-ESI: calcd. for  $\text{C}_{24}\text{H}_{19}\text{ClNO}_7$   $[\text{M}+\text{H}]^+$  468.0845, found: 468.0844.

**Ethyl-6'-bromo-2-hydroxy-1'-methyl-2',5,10-trioxo-2,3,5,10-tetrahydrospiro[benzo[g]chromene-4,3'-indoline]-2-carboxylate 6m**

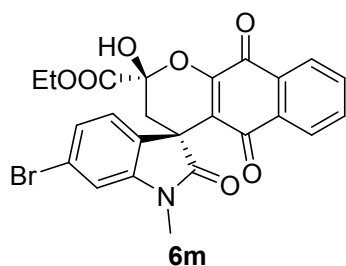

foamy solid, 28.2 mg, 55% yield; 97% *ee*, > 20/1 *dr*,  $[\alpha]_{\text{D}}^{26} = -4.69$  ( $c = 0.91$ ,  $\text{CH}_2\text{Cl}_2$ ); [Daicel Chiralpak IA, hexane/*i*-PrOH (70:30), flow rate: 1.0  $\text{mL}\cdot\text{min}^{-1}$ ,  $\lambda = 254$  nm,  $t$  (major) = 14.557,  $t$  (minor) = 13.511];  $^1\text{H}$  (400 Hz,  $\text{CDCl}_3$ ):  $\delta$  8.92 (s, 0.4H), 8.13 – 8.07 (m, 1H), 7.88 – 7.81 (m, 1H), 7.71 – 7.63 (m, 2H), 7.52 – 7.50 (m, 0.6H), 7.22 – 7.08 (m, 2H), 6.94 – 6.92 (m, 0.4H), 5.21 (s, 0.6H), 4.37 (q,  $J = 8.0$  Hz, 2H), 3.37 (s, 1.3H), 3.35 (s, 1.7H), 3.00 (d,  $J = 16.0$  Hz, 0.6H), 2.76 (d,  $J = 16.0$  Hz, 0.4H), 2.55 (d,  $J = 16.0$  Hz, 0.4H), 2.14 (d,  $J = 16.0$  Hz, 0.6H), 1.39 (t,  $J = 8.0$  Hz, 1.35H), 1.35 (t,  $J = 8.0$  Hz, 1.65H);  $^{13}\text{C}$  NMR (101 MHz,  $\text{CDCl}_3$ ):  $\delta$  182.40, 182.38, 179.65, 178.73, 178.50, 178.39, 168.11, 166.65, 155.34, 154.20, 145.32, 145.12, 134.59, 134.52, 133.94, 133.76, 131.44, 130.99, 130.91, 130.85, 130.34, 128.23, 127.02, 126.92, 126.71, 126.70, 126.54, 125.21, 123.55, 122.89, 122.55, 122.29, 121.25, 120.29, 113.05, 112.03, 96.99, 95.03, 64.26, 63.12, 46.54, 45.30, 37.21, 36.58, 27.37, 27.29, 14.16, 14.08; IR: 3427.4, 2926.5, 1750.7, 1717.0, 1655.8, 1603.2, 1466.5, 1432.5, 1302.1, 1272.6, 1126.7, 1101.6, 1066.6, 976.1, 953.2, 905.4, 791.9, 744.4, 674.2, 586.9, 509.3  $\text{cm}^{-1}$ ; HRMS-ESI: calcd. for  $\text{C}_{24}\text{H}_{19}\text{BrNO}_7$   $[\text{M}+\text{H}]^+$  512.0339, found: 512.0347.

**Ethyl-2-hydroxy-6'-methoxy-1'-methyl-2',5,10-trioxo-2,3,5,10-tetrahydrospiro[benzo[g]chromene-4,3'-indoline]-2-carboxylate 6n**

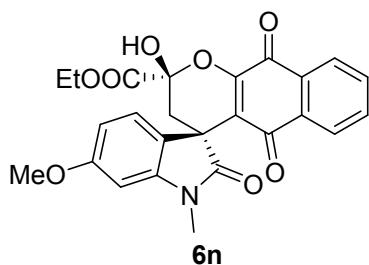

foamy solid, 29.2 mg, 63% yield; 97% *ee*, > 20/1 *dr*,  $[\alpha]_{\text{D}}^{26} = -86.40$  ( $c = 1.01$ ,  $\text{CH}_2\text{Cl}_2$ ); [Daicel Chiralpak OD-H, hexane/*i*-PrOH (70:30), flow rate: 1.0  $\text{mL}\cdot\text{min}^{-1}$

$^1$ ,  $\lambda = 254$  nm,  $t$  (major) = 12.908,  $t$  (minor) = 11.065];  $^1\text{H}$  (400 Hz,  $\text{CDCl}_3$ ):  $\delta$  9.11 (s, 0.4H), 8.13 – 8.07 (m, 1H), 7.88 – 7.82 (m, 1H), 7.68 – 7.63 (m, 2H), 7.54 – 7.51 (m, 0.4H), 6.95 – 6.93 (m, 0.6H), 6.58 – 6.45 (m, 2H), 5.15 (s, 0.4H), 4.37 (q,  $J = 8.0$  Hz, 2H), 3.82 (s, 1.70H), 3.81 (s, 1.3H), 3.36 (s, 1.7H), 3.35 (s, 1.3H), 3.00 (d,  $J = 16.0$  Hz, 0.4H), 2.77 (d,  $J = 16.0$  Hz, 0.6H), 2.53 (d,  $J = 16.0$  Hz, 0.6H), 2.13 (d,  $J = 16.0$  Hz, 0.4H), 1.38 (t,  $J = 8.0$  Hz, 1.7H), 1.35 (t,  $J = 8.0$  Hz, 1.3H);  $^{13}\text{C}$  NMR (101 MHz,  $\text{CDCl}_3$ ):  $\delta$  182.48, 182.47, 180.33, 179.08, 178.73, 168.34, 166.87, 161.01, 160.59, 155.10, 153.98, 145.28, 145.08, 134.45, 134.39, 133.75, 133.60, 131.60, 131.58, 130.94, 130.88, 127.56, 126.80, 126.71, 126.61, 126.52, 123.62, 123.52, 122.93, 121.93, 121.06, 107.81, 106.07, 100.11, 97.65, 97.15, 96.46, 95.17, 64.15, 62.99, 55.72, 55.57, 46.35, 45.11, 37.66, 36.93, 27.25, 27.19, 14.17, 14.08.; IR: 3431.8, 2926.2, 1749.7, 1714.8, 1682.2, 1656.0, 1619.9, 1332.0, 1269.1, 1221.4, 1201.7, 980.4, 832.2, 796.7, 721.2, 687.2, 424.1  $\text{cm}^{-1}$ ; HRMS-ESI: calcd. for  $\text{C}_{25}\text{H}_{22}\text{NO}_8$   $[\text{M}+\text{H}]^+$  464.1340, found: 464.1344.

**Ethyl-7'-fluoro-2-hydroxy-1'-methyl-2',5,10-trioxo-2,3,5,10-tetrahydrospiro[benzo[g]chromene-4,3'-indoline]-2-carboxylate 6o**

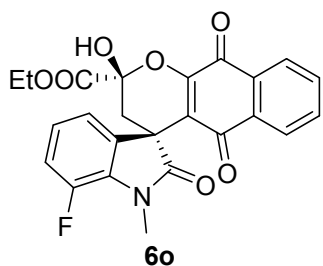

foamy solid, 27.5 mg, 61% yield; 93% *ee*, > 20/1 *dr*,  $[\alpha]_{\text{D}}^{26} = -23.30$  ( $c = 0.78$ ,  $\text{CH}_2\text{Cl}_2$ ); [Daicel Chiralpak IA, hexane/*i*-PrOH (70:30), flow rate: 1.0  $\text{mL}\cdot\text{min}^{-1}$ ,  $\lambda = 254$  nm,  $t$  (major) = 13.161,  $t$  (minor) = 15.137];  $^1\text{H}$  (400 Hz,  $\text{CDCl}_3$ ):  $\delta$  9.00 (s, 0.55H), 8.14 – 8.08 (m, 1H), 7.89 – 7.83 (m, 1H), 7.70 – 7.65 (m, 2H), 7.45 – 7.43 (m, 0.4H), 7.11 – 7.05 (m, 0.6H), 7.03 – 6.98 (m, 1H), 6.91 – 6.83 (m, 1H), 5.15 (s, 0.45H), 4.38 (q,  $J = 8.0$  Hz, 2H), 3.59 – 3.58 (m, 3H), 3.02 (d,  $J = 16.0$  Hz, 0.4H), 2.76 (d,  $J = 16.0$  Hz, 0.6H), 2.58 (d,  $J = 16.0$  Hz, 0.6H), 2.18 (d,  $J = 16.0$  Hz, 0.4H), 1.39 (t,  $J = 8.0$  Hz, 1.7H), 1.35 (t,  $J = 8.0$  Hz, 1.3H);  $^{13}\text{C}$  NMR (101 MHz,  $\text{CDCl}_3$ ): 182.39, 182.36, 179.42, 178.79, 178.56, 178.34, 178.22, 168.18, 166.68, 155.21, 154.11, 148.11 ( $J = 244$  Hz), 145.57 ( $J = 248$  Hz), 144.31, 134.55 ( $J = 7$  Hz), 133.92, 133.75, 131.49, 131.47, 130.91 ( $J = 6$  Hz), 126.92, 126.72, 126.55, 124.91, 124.89, 124.84, 122.73, 122.70, 122.67, 121.43, 120.53, 118.13, 118.10, 117.61, 117.33 ( $J = 19$  Hz), 116.79 ( $J = 19$  Hz), 97.07, 95.02,

64.29, 63.10, 47.04, 47.02, 37.48, 36.80, 29.90, 29.85, 14.17, 14.09; IR: 3419.4, 2984.2, 1751.4, 1720.0, 1683.7, 1656.0, 1621.7, 1594.4, 1270.8, 1203.1, 1160.4, 1059.4, 1017.6, 924.4, 790.3, 735.4, 723.6, 565.2, 456.3  $\text{cm}^{-1}$ ; HRMS-ESI: calcd. for  $\text{C}_{24}\text{H}_{19}\text{FNO}_7$   $[\text{M}+\text{H}]^+$  452.1140, found: 452.1119.

**Ethyl-2-hydroxy-1',7'-dimethyl-2',5,10-trioxo-2,3,5,10-**

**tetrahydrospiro[benzo[g]chromene-4,3'-indoline]-2-carboxylate 6p**

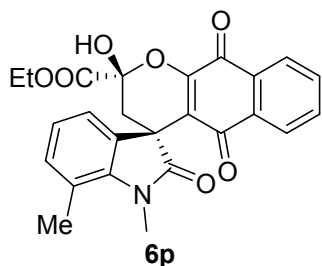

foamy solid, 35.8 mg, 70% yield; 98% *ee*, > 20/1 *dr*,  $[\alpha]_{\text{D}}^{26} = -40.00$  ( $c = 1.33$ ,  $\text{CH}_2\text{Cl}_2$ ); [Daicel Chiralpak OD-H, hexane/*i*-PrOH (70:30), flow rate: 1.0  $\text{mL}\cdot\text{min}^{-1}$ ,  $\lambda = 254$  nm,  $t$  (major) = 12.474,  $t$  (minor) = 8.329];  $^1\text{H}$  (400 Hz,  $\text{CDCl}_3$ ):  $\delta$  9.26 (s, 0.7H), 8.13–8.07 (m, 1H), 7.88 – 7.82 (m, 1H), 7.70 – 7.62 (m, 2H), 7.08 – 7.01 (m, 1H), 6.96 – 6.82 (m, 2H), 5.15 (s, 0.3H), 4.36 (q,  $J = 8.0$  Hz, 2H), 3.64 (s, 3H), 3.01 (d,  $J = 16.0$  Hz, 0.2H), 2.73 (d,  $J = 16.0$  Hz, 0.8H), 2.66 (s, 2.2H), 2.65 (s, 0.8H), 2.53 (d,  $J = 16.0$  Hz, 0.8H), 2.14 (d,  $J = 16.0$  Hz, 0.2H), 1.38 (t,  $J = 8.0$  Hz, 2.2H), 1.34 (t,  $J = 8.0$  Hz, 0.8H);  $^{13}\text{C}$  NMR (101 MHz,  $\text{CDCl}_3$ ):  $\delta$  182.54, 182.37, 180.36, 179.38, 178.69, 168.31, 166.82, 155.12, 154.07, 141.63, 141.46, 134.43, 134.36, 133.74, 133.59, 133.12, 132.69, 132.64, 132.15, 131.55, 130.93, 130.88, 126.80, 126.67, 126.60, 126.50, 124.68, 124.06, 122.13, 121.97, 121.19, 121.07, 120.19, 119.87, 97.14, 95.15, 64.11, 62.95, 46.30, 45.08, 37.88, 37.07, 30.66, 19.46, 19.06, 14.15, 14.06; IR: 3438.6, 2925.8, 1751.4, 1709.4, 1657.6, 1618.2, 1596.4, 1458.8, 1356.1, 1333.2, 1202.7, 1171.8, 977.9, 956.9, 787.7, 747.2, 598.8, 542.5  $\text{cm}^{-1}$ ; HRMS-ESI: calcd. for  $\text{C}_{25}\text{H}_{22}\text{NO}_7$   $[\text{M}+\text{H}]^+$  448.1391, found: 448.1402.

**Ethyl-2-hydroxy-1',5',7'-trimethyl-2',5,10-trioxo-2,3,5,10-**

**tetrahydrospiro[benzo[g]chromene-4,3'-indoline]-2-carboxylate 6q**

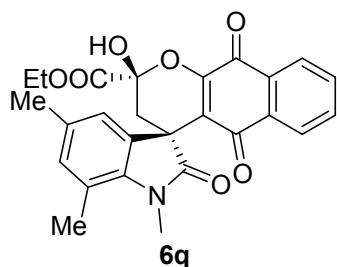

foamy solid, 32.3 mg, 70% yield; 94% *ee*, > 20/1 *dr*,  $[\alpha]_{\text{D}}^{26} = -44.40$  ( $c = 1.27$ ,  $\text{CH}_2\text{Cl}_2$ ); [Daicel Chiralpak IA, hexane/*i*-PrOH (70:30), flow rate: 1.0  $\text{mL}\cdot\text{min}^{-1}$ ,  $\lambda = 254$  nm,  $t$  (major) = 11.668,  $t$  (minor) = 7.381];  $^1\text{H}$  (400 Hz,  $\text{CDCl}_3$ ):  $\delta$  9.32 (s, 0.8H), 8.13 – 8.10 (m, 1H), 7.86 – 7.84



(m, 1H), 7.70 – 7.63 (m, 2H), 6.87 – 6.83 (m, 1H), 6.69 (s, 1H), 5.10 (s, 0.2H), 4.37 (q,  $J = 8.0$  Hz, 2H), 3.61 (s, 3H), 2.72 (d,  $J = 16.0$  Hz, 1H), 2.61 (s, 3H), 2.51 (d,  $J = 16.0$  Hz, 1H), 2.20 (s, 2.4H), 2.19 (s, 0.6H), 1.38 (t,  $J = 8.0$  Hz, 2.4H), 1.34 (t,  $J = 8.0$  Hz, 0.6H);  $^{13}\text{C}$  NMR (101 MHz,  $\text{CDCl}_3$ ):  $\delta$  182.41, 180.24, 178.73, 166.89, 155.12, 138.98, 134.41, 133.72, 133.58, 132.77, 131.61, 130.97, 126.79, 126.56, 121.31, 120.94, 120.72, 97.18, 62.94, 46.36, 38.02, 30.61, 20.91, 18.89, 14.16; IR: 3425.9, 2923.9, 1750.3, 1709.5, 1682.6, 1658.8, 1579.1, 1477.9, 1332.4, 1203.7, 1100.9, 981.6, 956.2, 861.6, 779.1, 761.3, 647.6, 531.6  $\text{cm}^{-1}$ ; HRMS-ESI: calcd. for  $\text{C}_{26}\text{H}_{24}\text{NO}_7$   $[\text{M}+\text{H}]^+$  462.1547, found: 462.1554.

**Ethyl-5',6'-difluoro-2-hydroxy-1'-methyl-2',5,10-trioxo-2,3,5,10-tetrahydrospiro[benzo[g]chromene-4,3'-indoline]-2-carboxylate 6r**

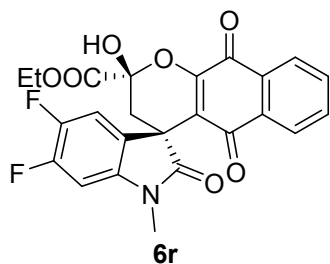

foamy solid, 36.6 mg, 78% yield; 95% *ee*, > 20/1 *dr*,  $[\alpha]_{\text{D}}^{26} = -5.97$  ( $c = 1.79$ ,  $\text{CH}_2\text{Cl}_2$ ); [Daicel Chiralpak IA, hexane/*i*-PrOH (70:30), flow rate: 1.0  $\text{mL}\cdot\text{min}^{-1}$ ,  $\lambda = 254$  nm,  $t$  (major) = 15.728,  $t$  (minor) = 11.683];  $^1\text{H}$  (400 Hz,  $\text{CDCl}_3$ ):  $\delta$  8.90 (s, 0.3H), 8.11 – 8.03 (m, 1H), 7.87 – 7.82

(m, 1H), 7.71 – 7.63 (m, 2H), 7.58 – 7.53 (m, 0.7H), 6.97 – 6.93 (m, 0.3H), 6.87 – 6.74 (m, 1H), 5.44 (s, 0.6H), 4.36 (q,  $J = 8.0$  Hz, 2H), 3.35 (s, 1H), 3.31 (s, 2H), 2.98 (d,  $J = 16.0$  Hz, 0.7H), 2.74 (d,  $J = 16.0$  Hz, 0.3H), 2.56 (d,  $J = 16.0$  Hz, 0.3H), 2.16 (d,  $J = 16.0$  Hz, 0.7H), 1.38 (t,  $J = 8.0$  Hz, 0.8H), 1.34 (t,  $J = 8.0$  Hz, 2.2H);  $^{13}\text{C}$  NMR (101 MHz,  $\text{CDCl}_3$ ):  $\delta$  182.43, 182.40, 178.67, 178.34, 167.94, 166.59, 154.16, 134.64, 134.56, 134.00, 133.81, 131.38, 130.87, 130.79, 126.94, 126.72, 126.66, 126.53, 121.04, 117.07, 116.86, 112.45, 112.24, 98.62, 98.39, 96.95, 95.07, 64.20, 63.16, 46.70, 45.52, 37.82, 36.61, 27.49, 27.41, 14.12, 14.04; IR: 3423.6, 2928.6, 1751.5, 1722.2, 1683.8, 1594.0, 1580.1, 1470.5, 1395.8, 1333.3, 1250.5, 1095.0, 948.4, 885.3, 833.2, 780.1, 763.0, 721.2, 691.3, 618.1, 505.3  $\text{cm}^{-1}$ ; HRMS-ESI: calcd. for  $\text{C}_{24}\text{H}_{18}\text{F}_2\text{NO}_7$   $[\text{M}+\text{H}]^+$  470.1046, found: 470.1044.

**Methyl-2-hydroxy-1'-methyl-2',5,10-trioxo-2,3,5,10-tetrahydrospiro[benzo[g]chromene-4,3'-indoline]-2-carboxylate 6s**

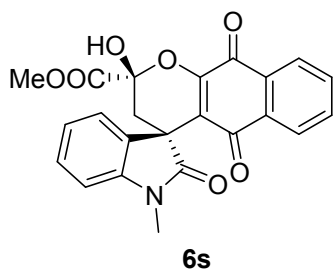

foamy solid, 31.0 mg, 74% yield; >99% *ee*, > 20/1 *dr*,  
 $[\alpha]_{\text{D}}^{26} = -40.42$  ( $c = 1.41$ ,  $\text{CH}_2\text{Cl}_2$ ); [Daicel Chiralpak IA,  
 hexane/*i*-PrOH (70:30), flow rate:  $1.0 \text{ mL} \cdot \text{min}^{-1}$ ,  $\lambda = 254$   
 nm,  $t$  (major) = 17.990];  $^1\text{H}$  (400 Hz,  $\text{CDCl}_3$ ):  $\delta$  9.22 (s,  
 0.7H), 8.13 – 8.06 (m, 1H), 7.85 – 7.80 (m, 1H), 7.70 –

7.63 (m, 2.3H), 7.38 – 7.29 (m, 1H), 7.09 – 6.94 (m, 2.7H), 5.29 (s, 0.3H), 3.92 (s,  
 3H), 3.39 (s, 2H), 3.37 (s, 1H), 3.02 (d,  $J = 16.0$  Hz, 0.3H), 2.81 (d,  $J = 16.0$  Hz,  
 0.7H), 2.56 (d,  $J = 16.0$  Hz, 0.7H), 2.17 (d,  $J = 16.0$  Hz, 0.3H);  $^{13}\text{C}$  NMR (101 MHz,  
 $\text{CDCl}_3$ )  $\delta$  182.33, 182.30, 179.68, 179.44, 178.67, 178.42, 168.71, 167.31, 155.12,  
 153.98, 134.50, 134.42, 133.79, 133.61, 131.99, 131.53, 131.48, 130.90, 130.82,  
 129.39, 129.34, 128.86, 126.84, 126.76, 126.70, 126.62, 126.54, 124.24, 122.37,  
 122.25, 122.19, 120.89, 109.44, 108.51, 97.15, 95.22, 54.37, 53.68, 46.80, 45.53,  
 37.45, 36.81, 27.25, 27.16; IR: 3432.1, 2926.2, 1754.3, 1712.4, 1655.6, 1579.5,  
 1474.4, 1437.9, 1356.2, 1333.1, 1202.1, 1096.2, 1026.8, 972.5, 796.0, 753.9, 723.4,  
 684.6,  $543.0 \text{ cm}^{-1}$ ; HRMS-ESI: calcd. for  $\text{C}_{23}\text{H}_{18}\text{NO}_7$   $[\text{M}+\text{H}]^+$  420.1078, found:  
 420.1074.

**Ethyl-2-hydroxy-1',7-dimethyl-2',5,10-trioxo-2,3,5,10-**  
**tetrahydrospiro[benzo[g]chromene-4,3'-indoline]-2-carboxylate 6t**

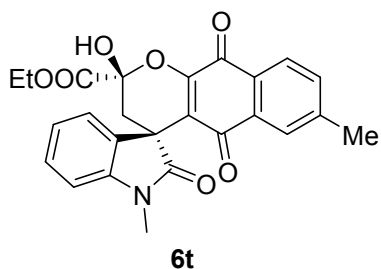

foamy solid, 37.9 mg, 85% yield; 93% *ee*, > 20/1 *dr*,  
 $[\alpha]_{\text{D}}^{26} = -0.69$  ( $c = 1.43$ ,  $\text{CH}_2\text{Cl}_2$ ); [Daicel Chiralpak  
 IA, hexane/*i*-PrOH (70:30), flow rate:  $1.0 \text{ mL} \cdot \text{min}^{-1}$ ,  $\lambda$   
 = 254 nm,  $t$  (major) = 16.323,  $t$  (minor) = 22.584];  $^1\text{H}$   
 (400 Hz,  $\text{CDCl}_3$ ):  $\delta$  9.15 (s, 0.65H), 7.91 – 7.87 (m,

1H), 7.75 – 7.69 (m, 1H), 7.65 – 7.64 (m, 0.35H), 7.44 – 7.28 (m, 2H), 7.09 – 6.99  
 (m, 2H), 6.97 – 6.93 (m, 0.65H), 5.20 (s, 0.35H), 4.37 (q,  $J = 8.0$  Hz, 2H), 3.38 (s,  
 2H), 3.37 (s, 1H), 3.01 (d,  $J = 16.0$  Hz, 0.35H), 2.78 (d,  $J = 16.0$  Hz, 0.65H), 2.55 (d,  
 $J = 16.0$  Hz, 0.65H), 2.45 (s, 2H), 2.44 (s, 1H), 2.16 (d,  $J = 16.0$  Hz, 0.35H), 1.38 (t,  
 $J = 8.0$  Hz, 1.90H), 1.35 (t,  $J = 8.0$  Hz, 1.1H);  $^{13}\text{C}$  NMR (101 MHz,  $\text{CDCl}_3$ ):  $\delta$  182.31,  
 179.78, 179.21, 178.97, 178.63, 168.35, 166.87, 155.09, 153.98, 144.97, 144.73,  
 143.94, 143.83, 135.17, 135.11, 132.20, 131.60, 130.84, 130.78, 129.32, 129.31,

128.82, 127.16, 126.97, 126.89, 126.82, 126.72, 124.20, 122.34, 122.25, 121.63, 120.72, 109.40, 108.49, 97.04, 95.10, 64.12, 63.00, 46.83, 45.59, 37.50, 36.74, 27.23, 27.17, 21.84, 21.18, 14.16, 14.08; IR: 3431.4, 2925.4, 1749.7, 1682.0, 1611.4, 1305.0, 1162.6, 1047.7, 1025.7, 754.8  $\text{cm}^{-1}$ ; HRMS-ESI: calcd. for  $\text{C}_{25}\text{H}_{22}\text{NO}_7$   $[\text{M}+\text{H}]^+$  448.1391, found: 448.1386.

### 3.3 Synthesis of compound 7

In an ordinary tube equipped with a magnetic stirring bar, the solution of **4w** (45.1mg, 0.1 mmol, 1 equiv), TMSCl (75.6  $\mu\text{L}$ , 0.6 mmol, 6 equiv), in  $\text{CH}_3\text{CN}$  (1.0 mL) was stirred at rt for 30 min, and then triethylamine (83.0  $\mu\text{L}$ , 0.6 mmol, 6 equiv) was added. After 12h the reaction was completed, the reaction mixture was directly loaded onto a silica gel and purified by flash chromatography (eluent: petroleum ether/ ethyl acetate = 2:1) to give desired product **7**.

#### Ethyl-7'-methoxy-1-methyl-2,10'-dioxo-2'-((trimethylsilyl)oxy)-2',3'-dihydro-10'H-spiro[indoline-3,4'-pyrano[3,2-*b*]chromene]-2'-carboxylate **7**

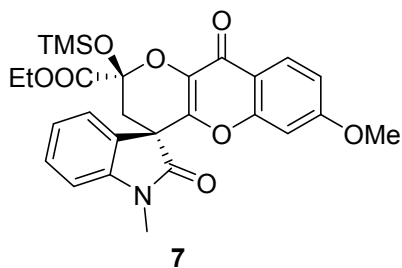

white solid, melting point: 71–73  $^{\circ}\text{C}$ , 27.3 mg, 52% yield; 97% *ee*, > 20/1 *dr*,  $[\alpha]_{\text{D}}^{26} = -30.59$  ( $c = 0.68$ ,  $\text{CHCl}_3$ ); [Daicel Chiralpak AD, hexane/*i*-PrOH (70:30), flow rate: 1.0  $\text{mL}\cdot\text{min}^{-1}$ ,  $\lambda = 254$  nm,  $t$  (major) = 16.431,  $t$  (minor) = 19.872];  $^1\text{H}$  NMR (400

MHz,  $\text{CDCl}_3$ )  $\delta$  8.10 (d,  $J = 8.8$  Hz, 1H), 7.70 (dd,  $J = 7.6, 0.8$  Hz, 1H), 7.39 (td,  $J = 7.6, 1.2$  Hz, 1H), 7.08 (td,  $J = 7.6, 1.2$  Hz, 1H), 6.97 (d,  $J = 7.6$  Hz, 1H), 6.87 (dd,  $J = 8.8, 2.4$  Hz, 1H), 6.50 (d,  $J = 2.4$  Hz, 1H), 4.31 (td,  $J = 7.2, 0.8$  Hz, 2H), 3.78 (s, 3H), 3.33 (s, 3H), 2.97 (d,  $J = 14.0$  Hz, 1H), 2.44 (d,  $J = 14.0$  Hz, 1H), 1.34 (t,  $J = 7.2$  Hz, 3H), 0.25 (s, 9H);  $^{13}\text{C}$  NMR (101 MHz,  $\text{CDCl}_3$ )  $\delta$  175.72, 171.07, 168.71, 164.01, 156.87, 146.96, 143.87, 136.55, 130.41, 129.43, 127.48, 127.04, 123.06, 117.68, 114.52, 108.69, 100.05, 95.35, 62.80, 55.88, 49.71, 40.95, 27.26, 14.16, 1.15; IR: 2987.8, 2943.8, 1767.6, 1725.3, 1768.7, 1600.5, 1623.4, 1430.3, 1294.9, 1276.7, 1246.7, 933.4, 904.8, 888.7, 838.8, 794.3  $\text{cm}^{-1}$ ; HRMS-ESI: calcd. for  $\text{C}_{27}\text{H}_{30}\text{NO}_8\text{Si}$   $[\text{M}+\text{H}]^+$  524.1735, found: 524.1745.

### 3.4 Synthesis of compound 8

In an ordinary tube equipped with a magnetic stirring bar, the solution of **6a** (64.9 mg, 0.15 mmol, 1 equiv), mesyl chloride (19.2  $\mu$ L, 0.25 mmol 1.67 equiv), in DCM (1.0 mL) was stirred at rt. for 30 min, and then triethylamine (34.6  $\mu$ L, 0.25 mmol, 1.67 equiv) was added. After 12h the reaction was finished, the reaction mixture was directly loaded onto a silica gel and purified by flash chromatography (eluent: petroleum ether/ethyl acetate = 5:1) to give desired product **8**.

**Ethyl-1'-methyl-2-((methylsulfonyl)oxy)-2',5,10-trioxo-2,3,5,10-tetrahydrospiro[benzo[g]chromene-4,3'-indoline]-2-carboxylate **8****

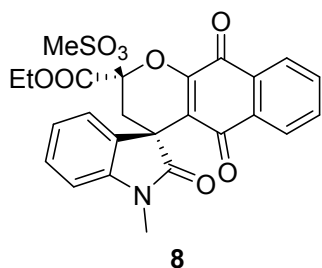

yellow solid, melting point: 124–126 °C, 73.7 mg, 96% yield; 94% *ee*, 8/1 *dr*,  $[\alpha]_D^{26} = -34.05$  ( $c = 0.79$ ,  $\text{CHCl}_3$ ); [Daicel Chiralpak IA, hexane/*i*-PrOH (70:30), flow rate: 1.0 mL·min<sup>-1</sup>,  $\lambda = 254$  nm,  $t$  (major) = 42.444,  $t$  (minor) = 17.437]; <sup>1</sup>H (400 Hz,  $\text{CDCl}_3$ ):  $\delta$  8.13 (dd,  $J = 7.7, 1.2$  Hz, 1H), 7.86 (dd,  $J = 7.6, 1.2$  Hz, 1H), 7.73 – 7.64 (m, 2H), 7.45 (dd,  $J = 7.6, 0.8$  Hz, 1H), 7.36 (td,  $J = 7.6, 1.2$  Hz, 1H), 7.03 (td,  $J = 7.6, 1.2$  Hz, 1H), 6.99 (d,  $J = 8.0$  Hz, 1H), 4.39 (qd,  $J = 7.2, 2.8$  Hz, 2H), 3.36 (s, 3H), 3.25 (s, 3H), 2.74 (d,  $J = 14.4$  Hz, 1H), 2.59 (d,  $J = 14.4$  Hz, 1H), 1.36 (t,  $J = 7.2$  Hz, 3H); <sup>13</sup>C NMR (101 MHz,  $\text{CDCl}_3$ ):  $\delta$  182.00, 177.31, 164.76, 152.65, 144.02, 134.57, 134.06, 131.30, 130.89, 130.78, 129.39, 126.92, 126.76, 125.70, 122.79, 121.80, 109.00, 99.15, 64.10, 45.36, 41.30, 38.67, 27.25, 13.96; IR: 2987.8, 2943.8, 1767.6, 1725.3, 1768.7, 1600.5, 1623.4, 1430.3, 1294.9, 1276.7, 1246.7, 933.4, 904.8, 888.7, 838.8, 794.3 cm<sup>-1</sup>; HRMS-ESI: calcd. for  $\text{C}_{25}\text{H}_{21}\text{NNaO}_7\text{S}$   $[\text{M}+\text{Na}]^+$  534.0829, found: 534.0827.

#### 4. $^1\text{H}$ NMR and $^{13}\text{C}$ NMR spectra

##### Ethyl-2'-hydroxy-1-methyl-2,10'-dioxo-2',3'-dihydro-10'H-spiro[indoline-3,4'-pyrano[3,2-*b*]chromene]-2'-carboxylate 4a

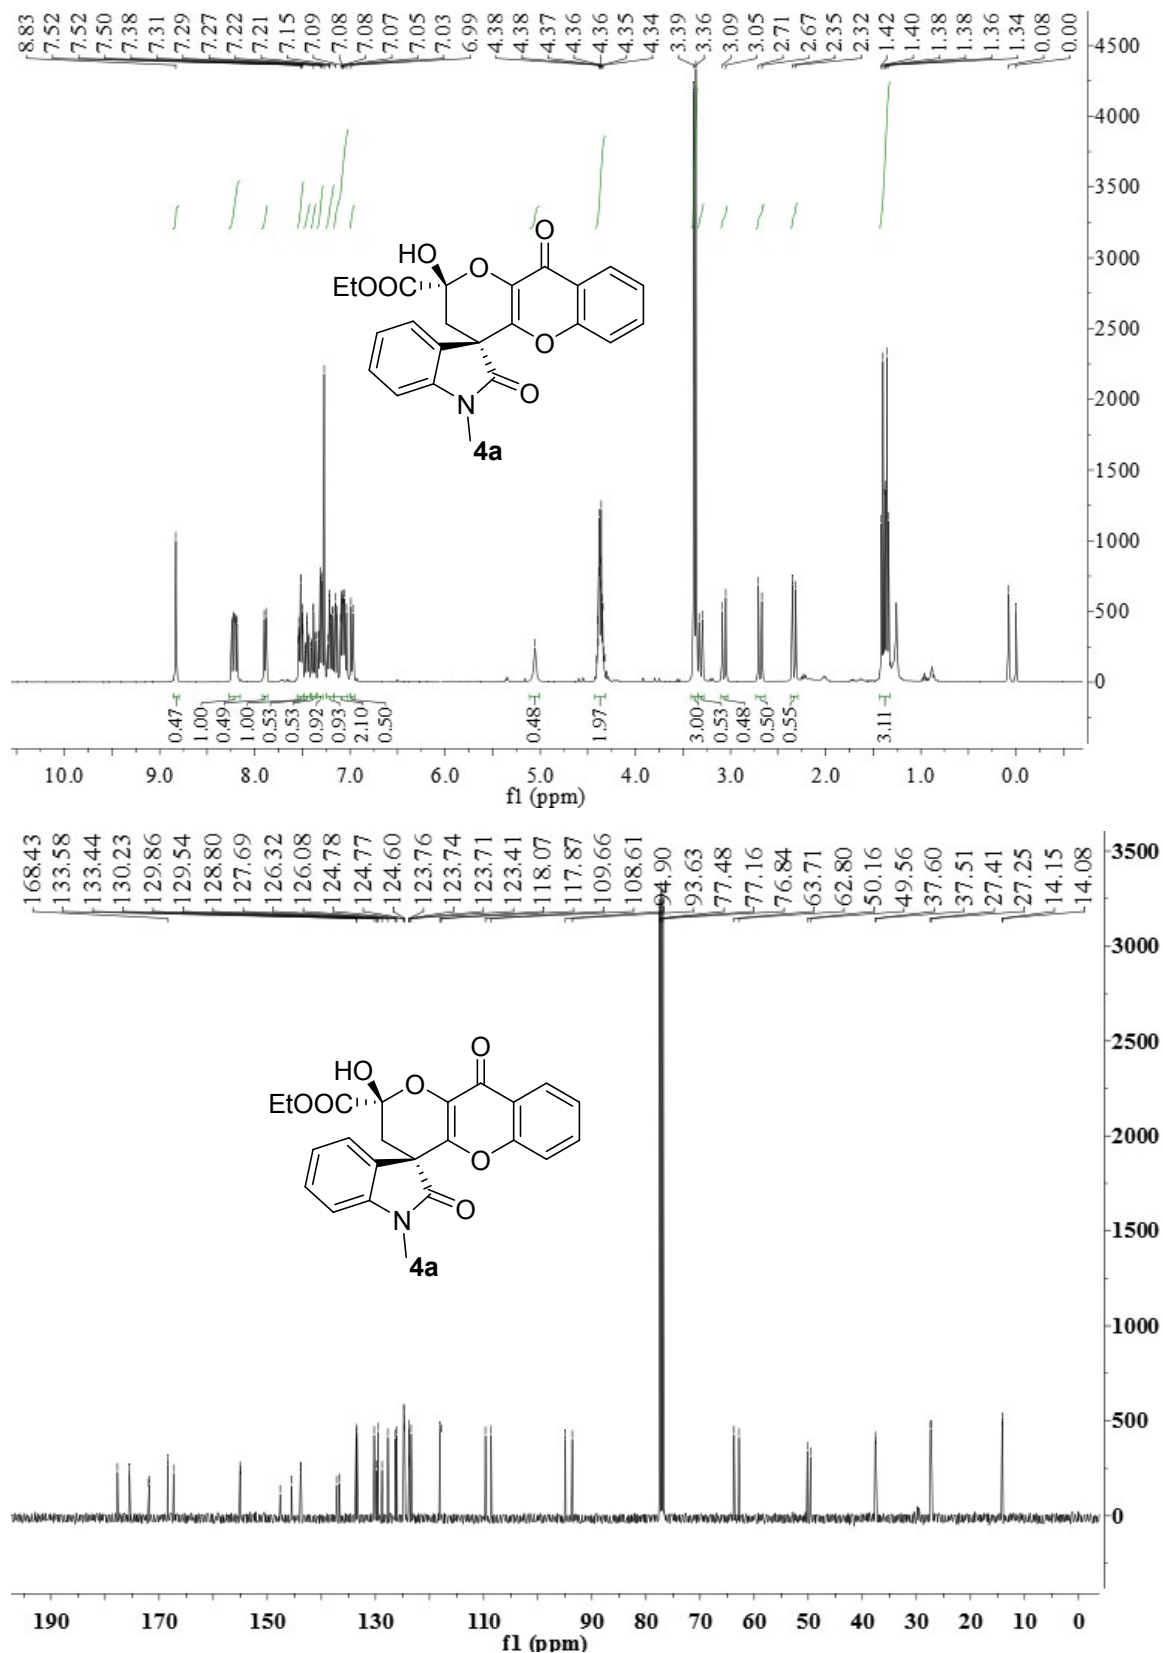

**Ethyl 2'-hydroxy-1-(methoxymethyl)-2,10'-dioxo-2',3'-dihydro-10'H-spiro [indoline-3,4'-pyrano[3,2-*b*]chromene]-2'-carboxylate 4b**

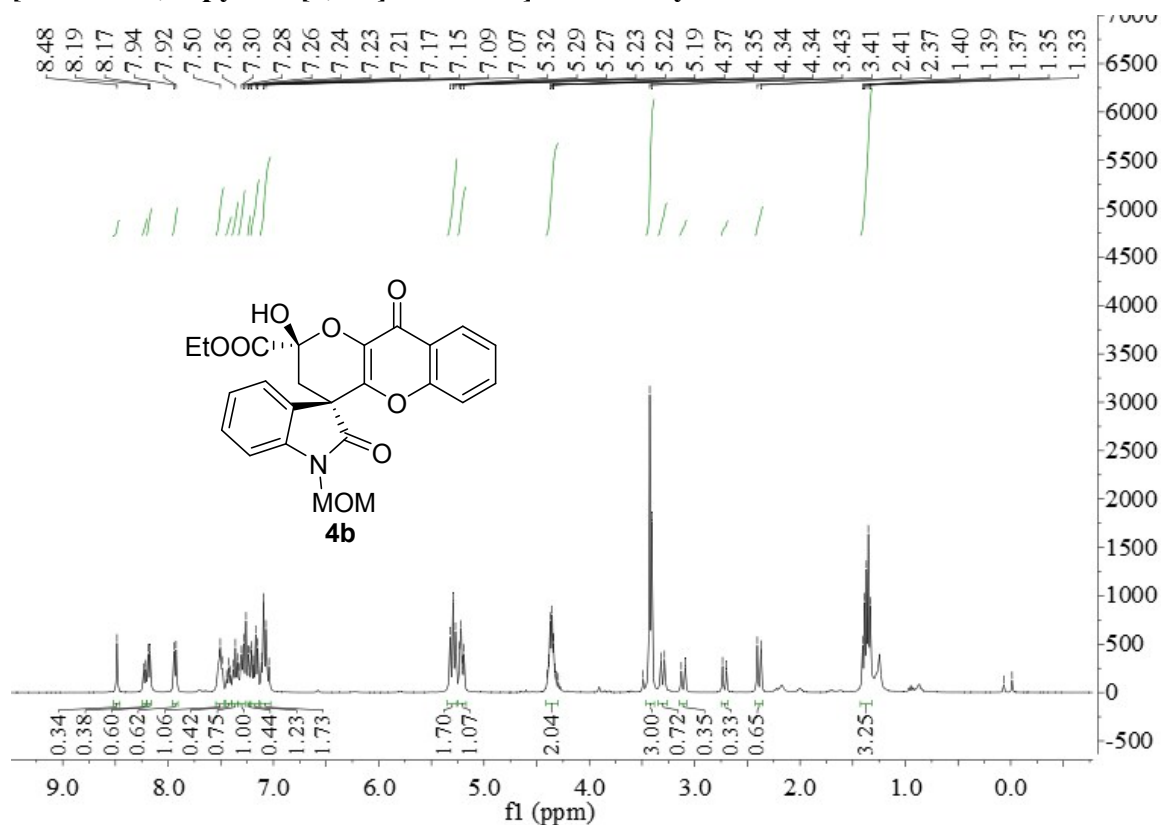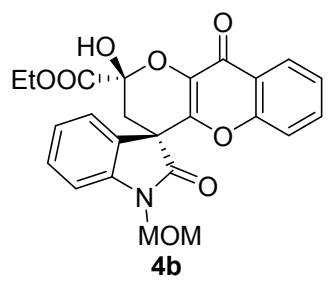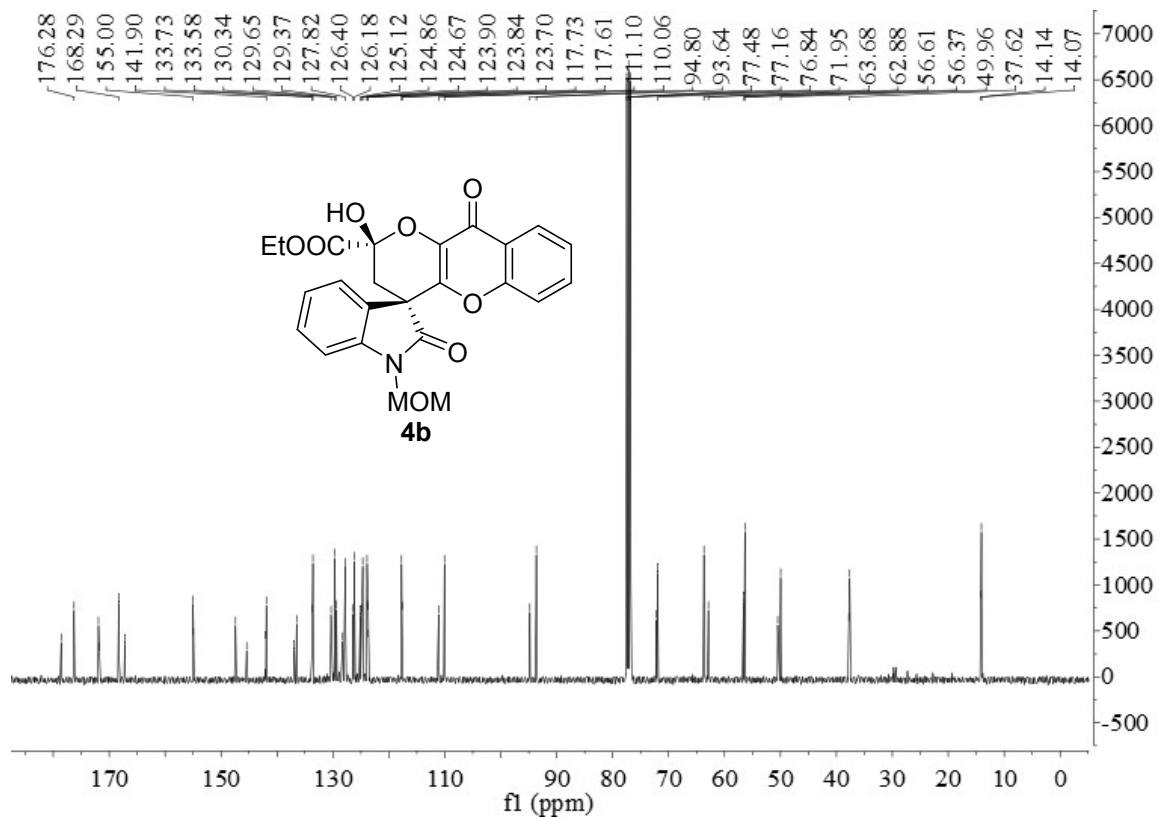

**Ethyl 1-benzyl-2'-hydroxy-2,10'-dioxo-2',3'-dihydro-10'H-spiro[indoline-3,4'-pyrano[3,2-b]chromene]-2'-carboxylate 4c**

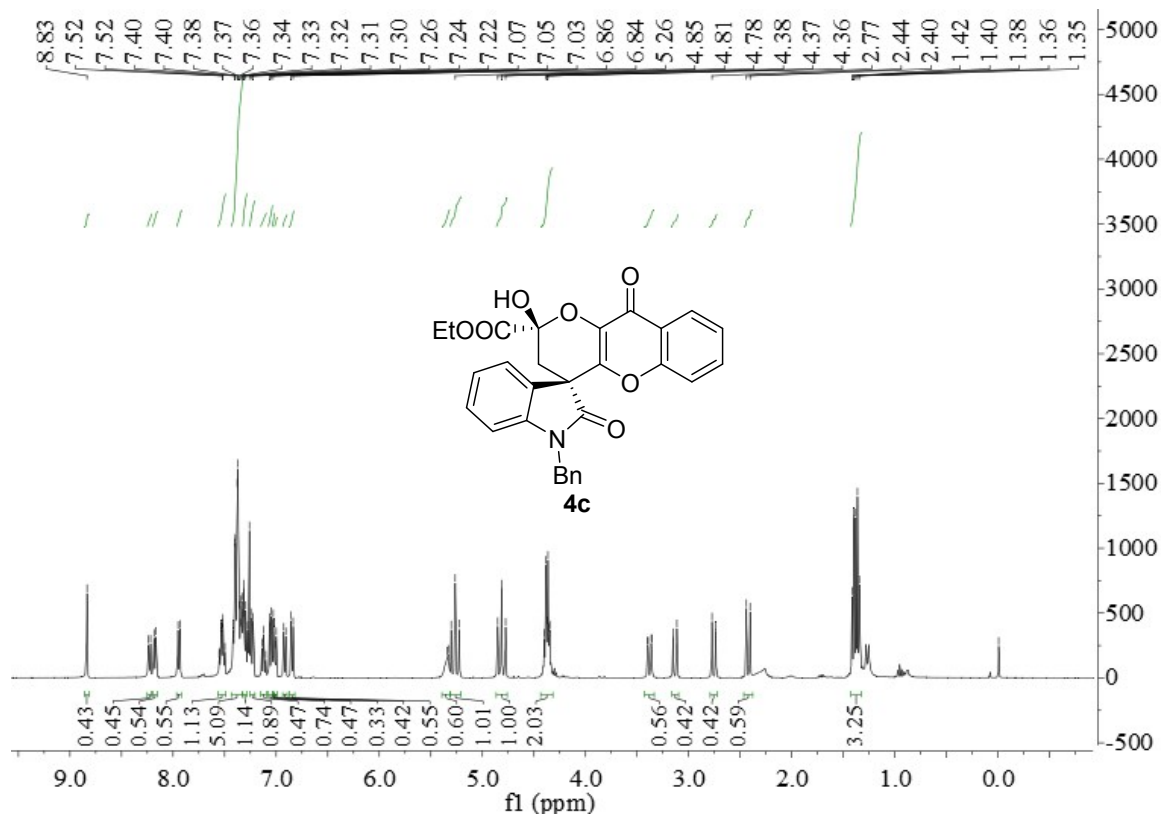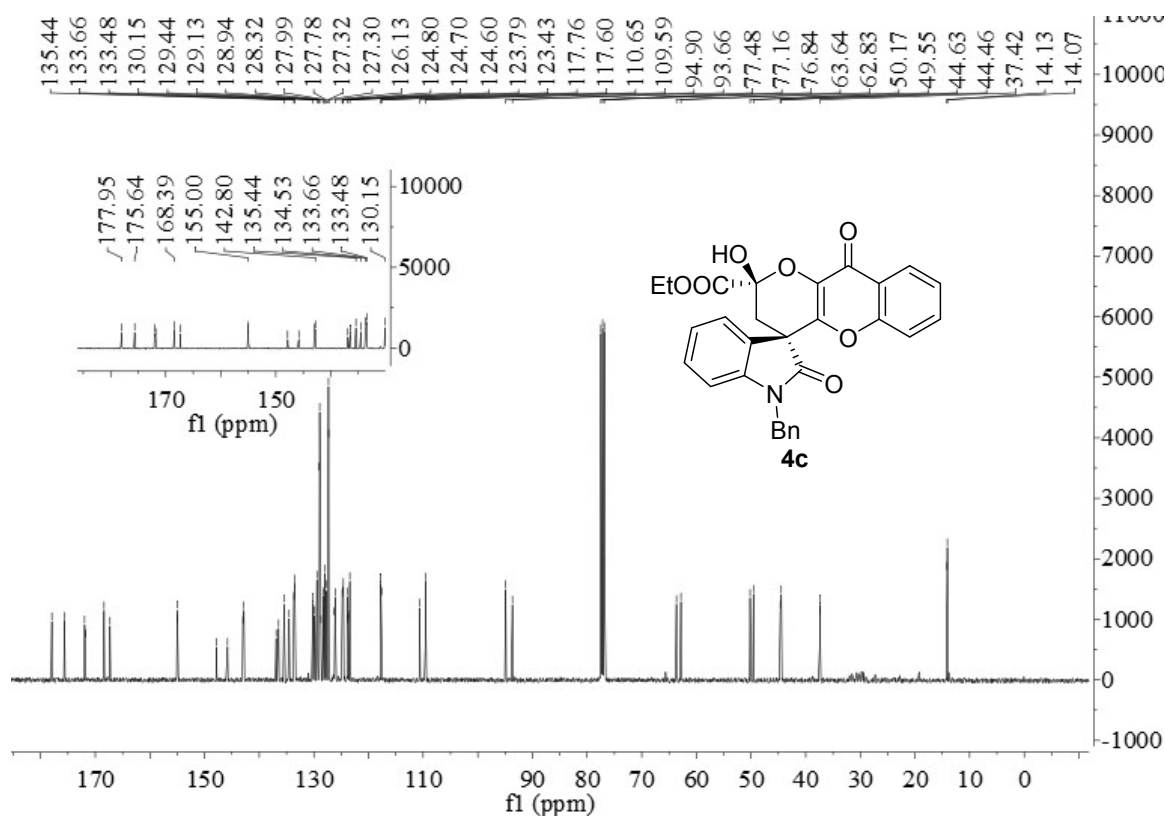

**Ethyl 1-allyl-2'-hydroxy-2,10'-dioxo-2',3'-dihydro-10'H-spiro[indoline-3,4'-pyrano[3,2-*b*]chromene]-2'-carboxylate 4d**

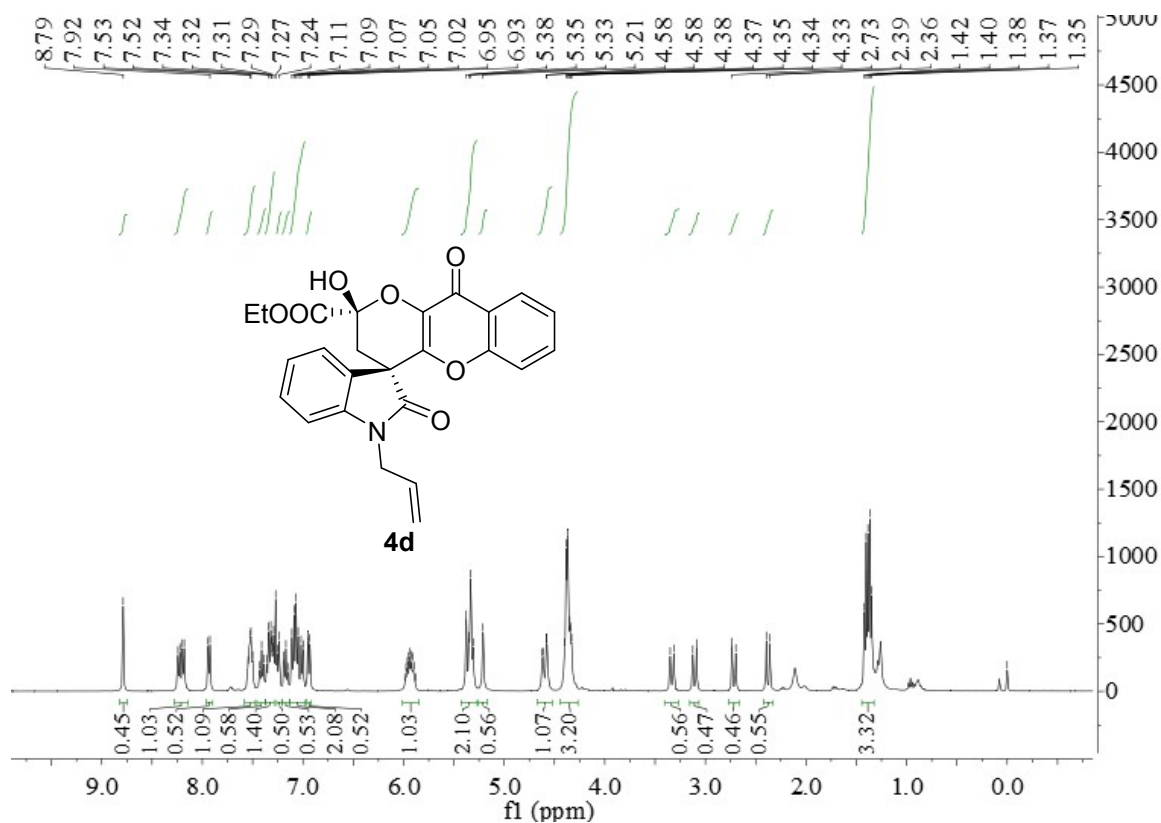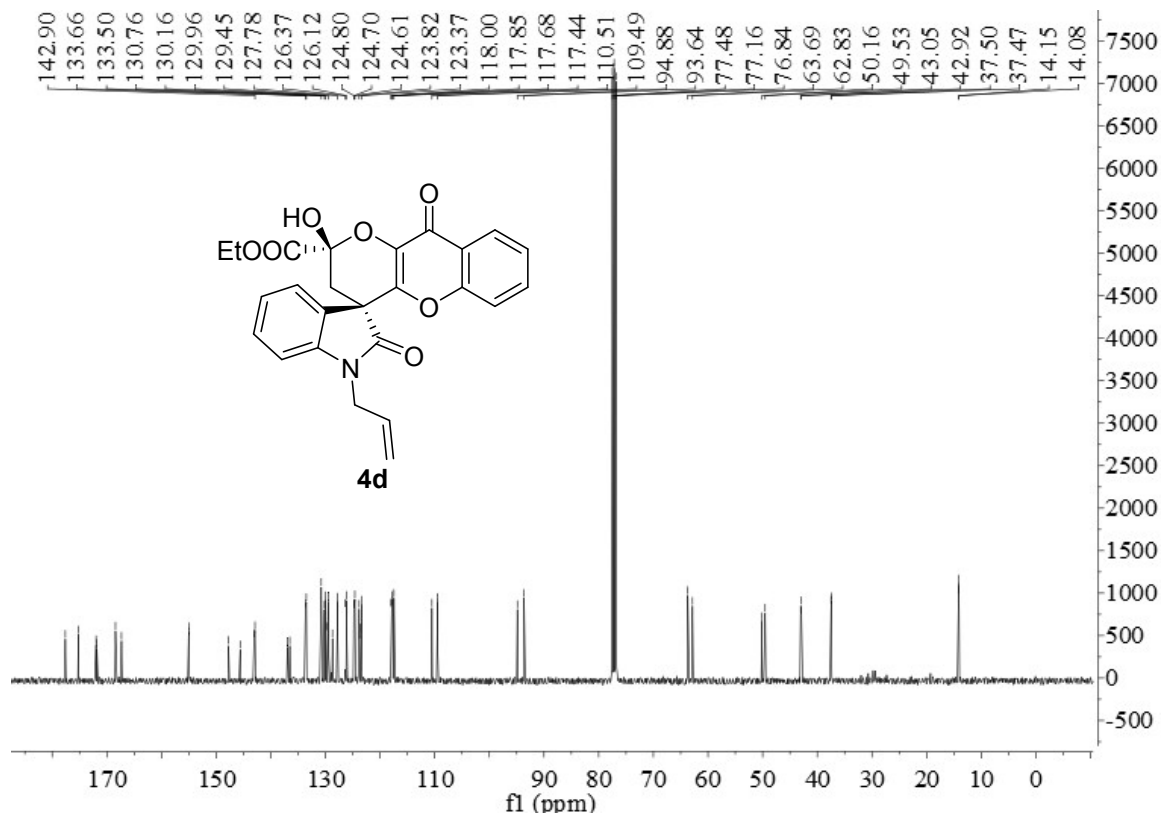

**1-benzyl 2'-ethyl 2'-hydroxy-2,10'-dioxo-2',3'-dihydro-10'H-spiro[indoline-**



**3,4'-pyrano[3,2-*b*]chromene]-1,2'-dicarboxylate 4e**

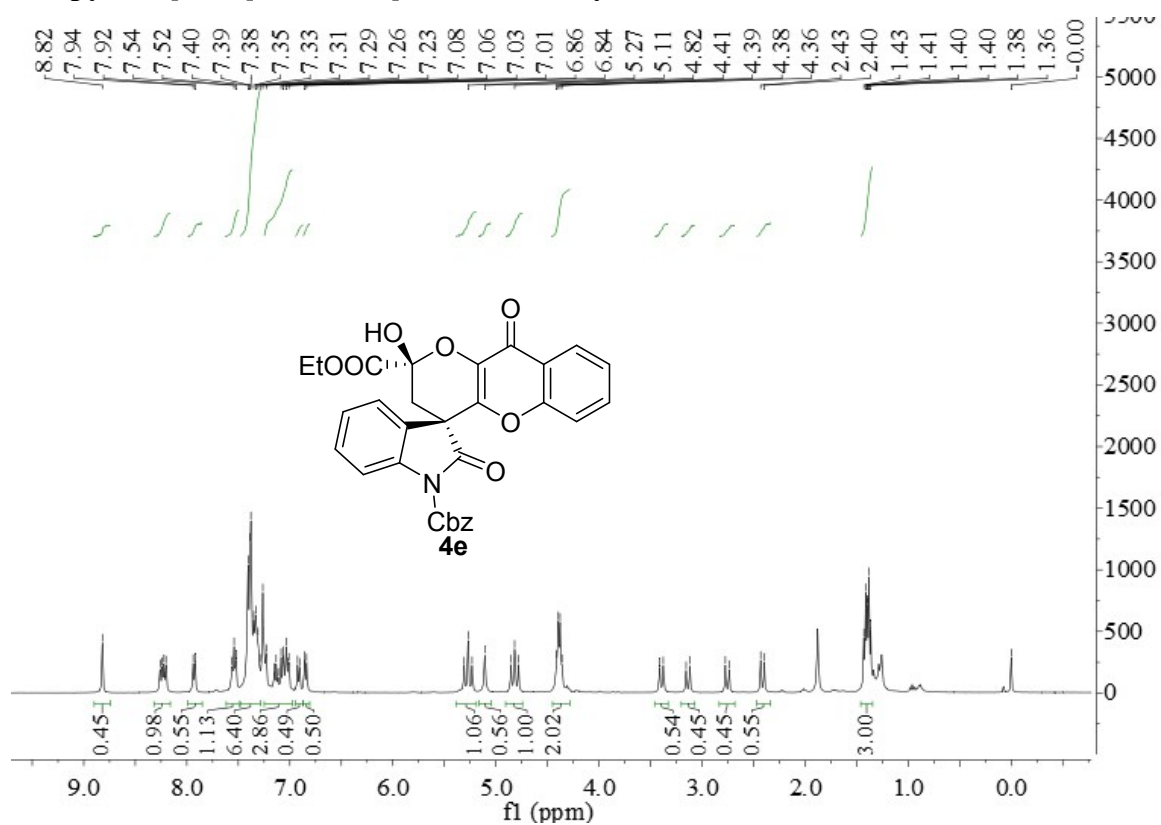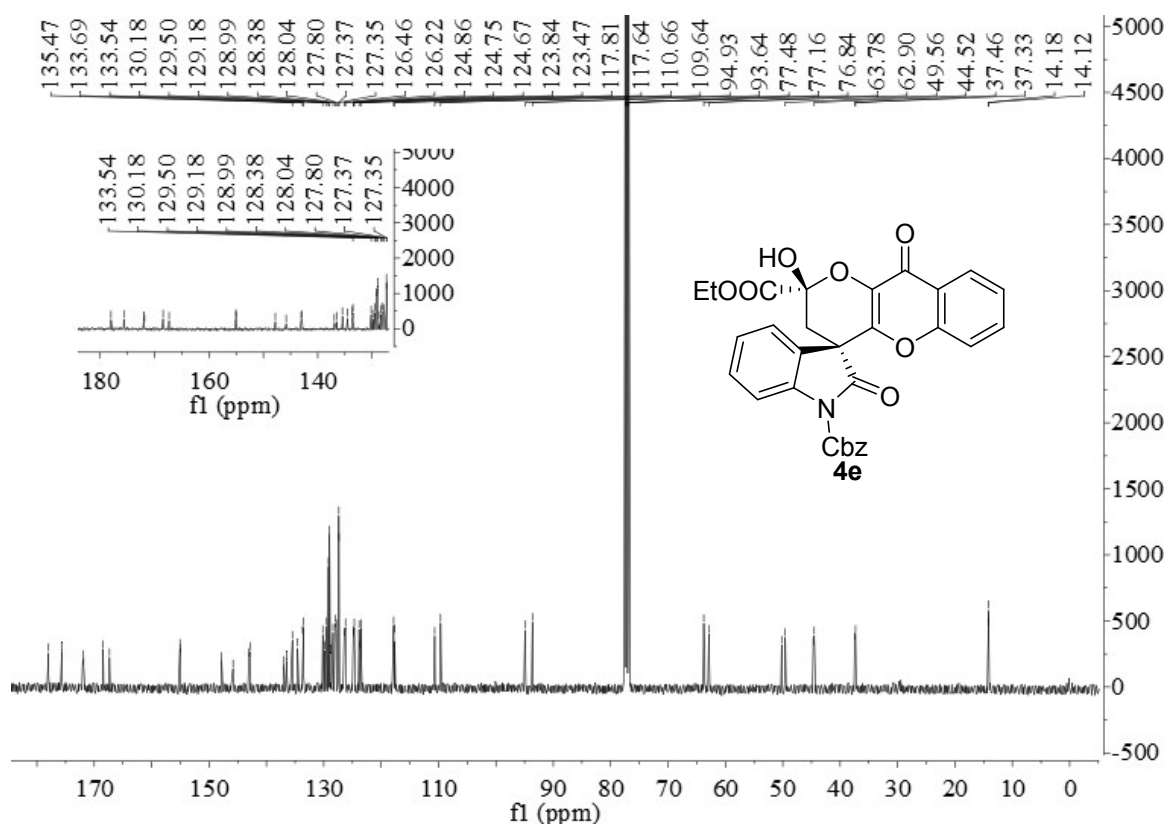

**Ethyl 1-acetyl-2'-hydroxy-2,10'-dioxo-2',3'-dihydro-10'H-spiro[indoline-**

**3,4'-pyrano[3,2-*b*]chromene]-2'-carboxylate 4f**

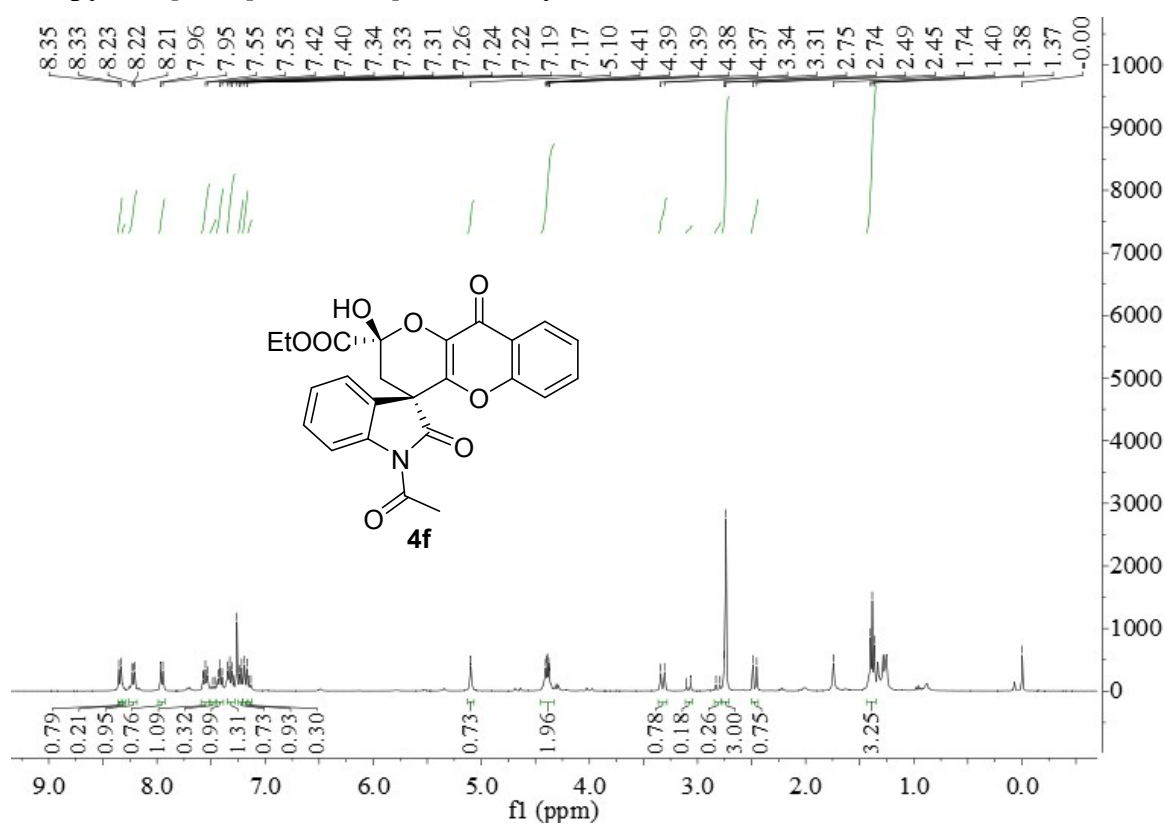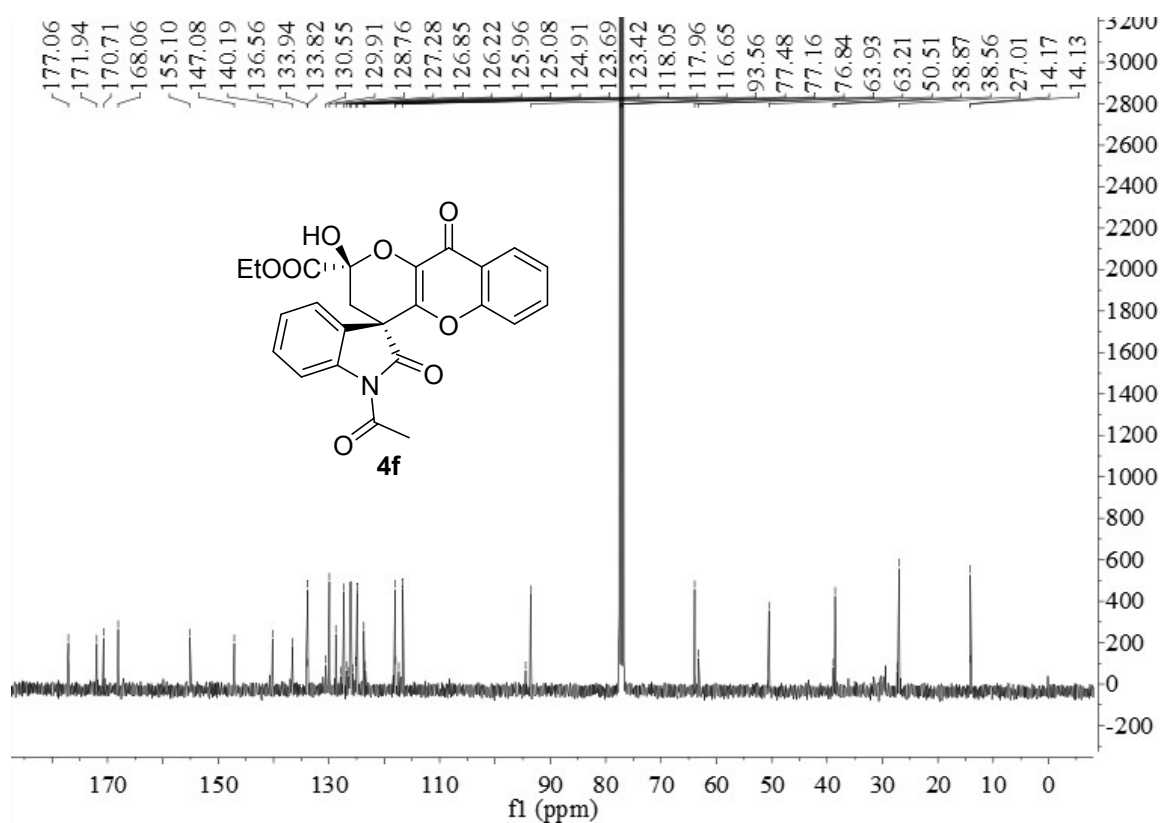

**Ethyl 5-fluoro-2'-hydroxy-1-methyl-2,10'-dioxo-2',3'-dihydro-10'H-spiro**

**[indoline-3,4'-pyrano[3,2-*b*]chromene]-2'--carboxylate 4g**

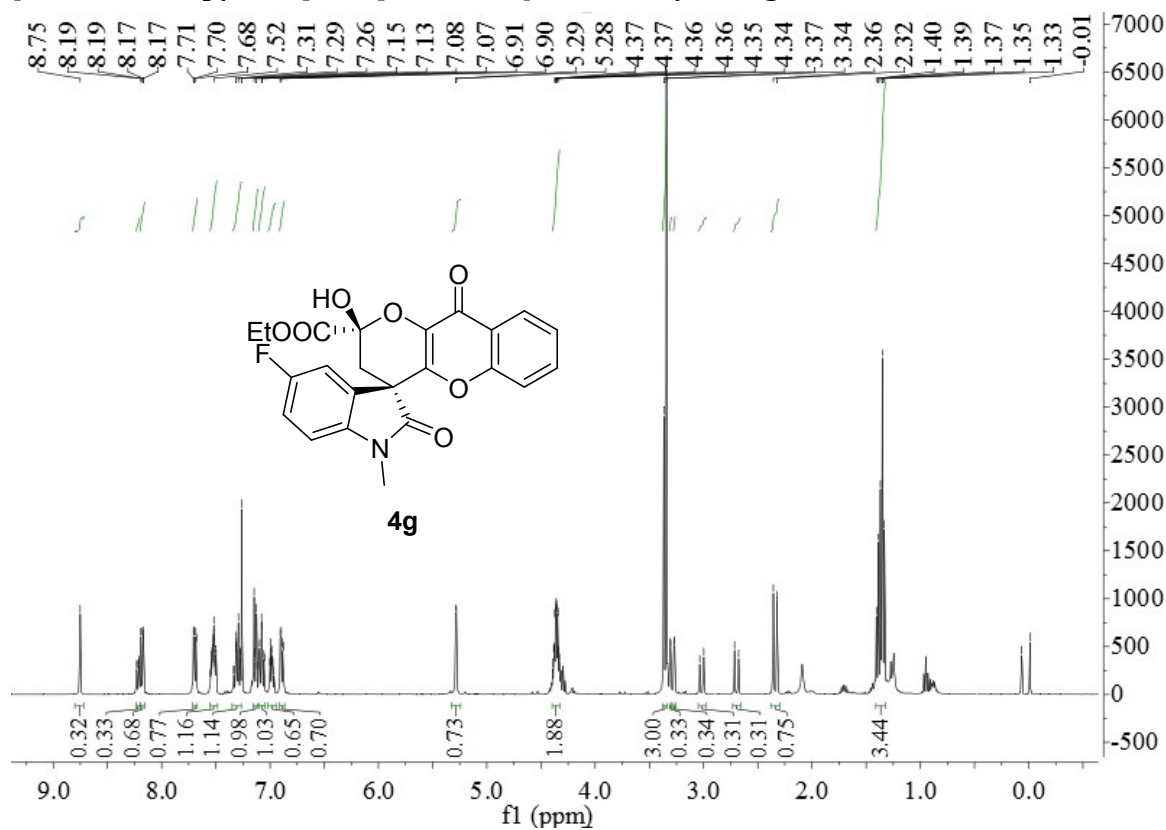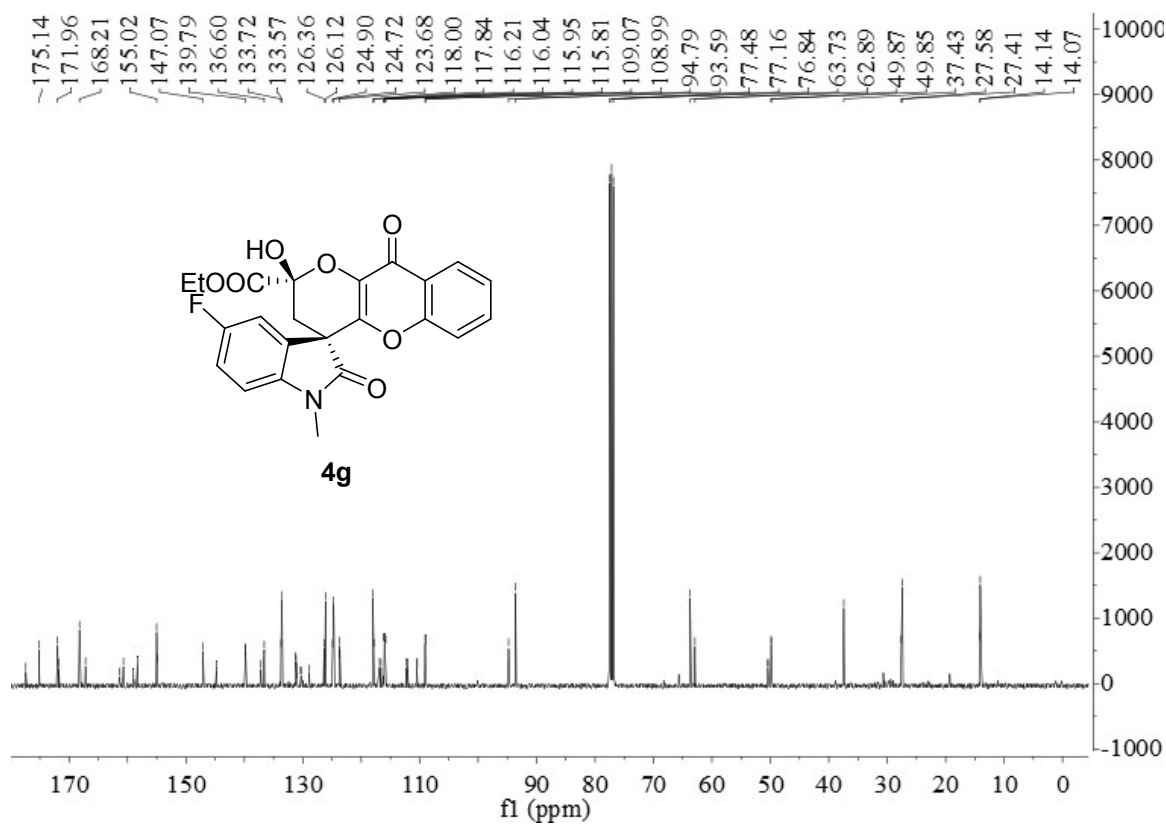

**Ethyl 5-chloro-2'-hydroxy-1-methyl-2,10'-dioxo-2',3'-dihydro-10'H-spiro**

**[indoline-3,4'-pyrano[3,2-*b*]chromene]-2'-carboxylate 4h**

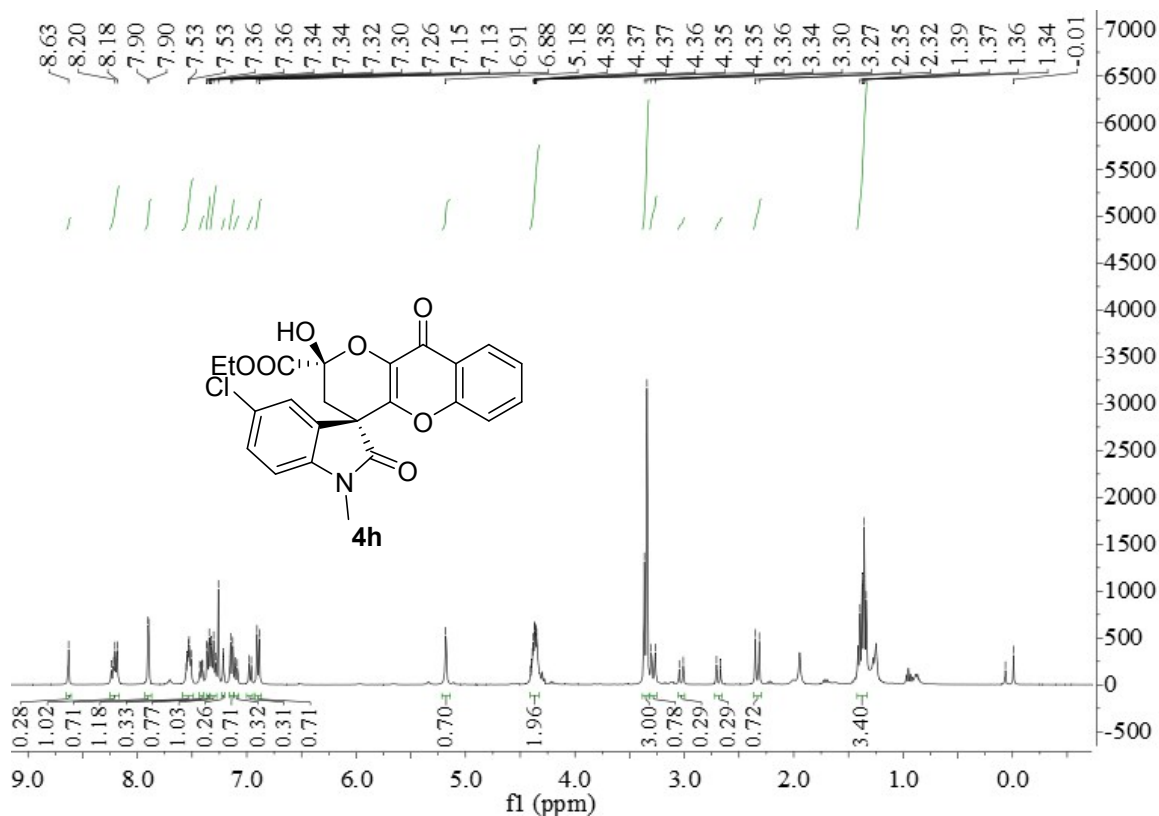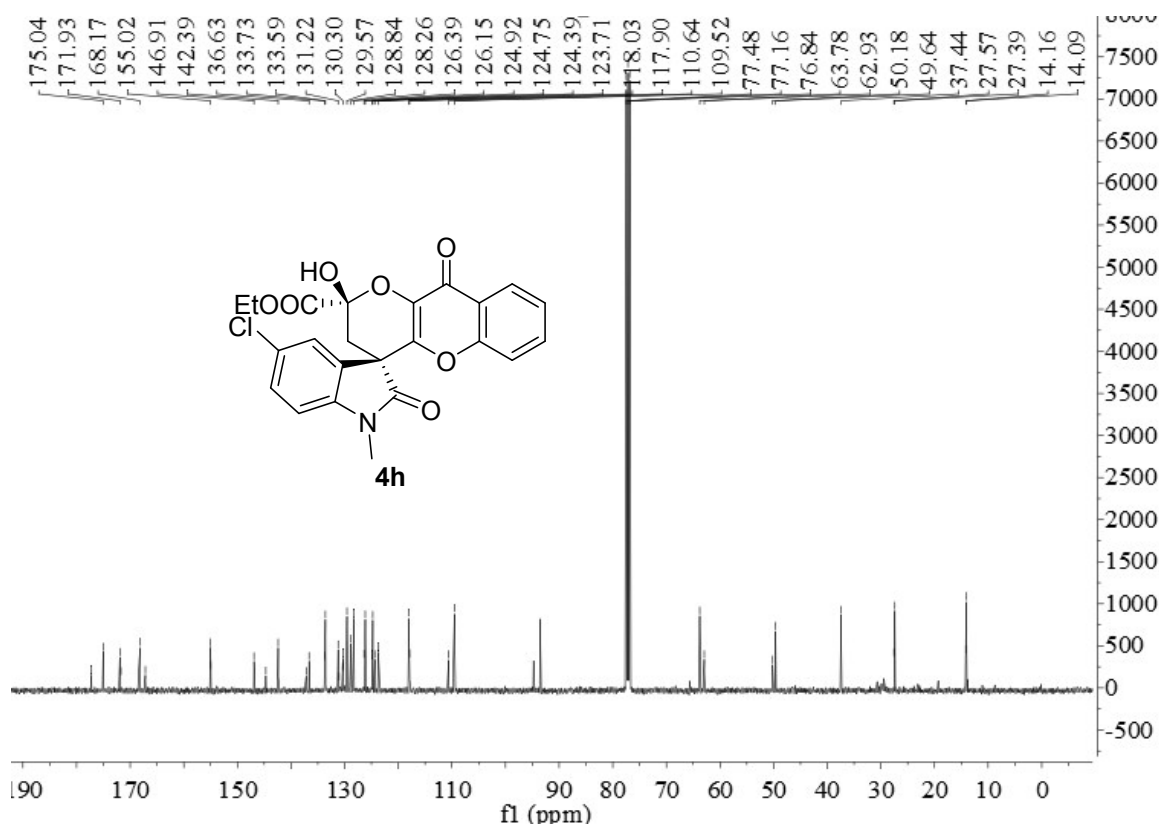

**Ethyl 5-bromo-2'-hydroxy-1-methyl-2,10'-dioxo-2',3'-dihydro-10'H-spiro**

**[indoline-3,4'-pyrano[3,2-*b*]chromene]-2'-carboxylate 4i**

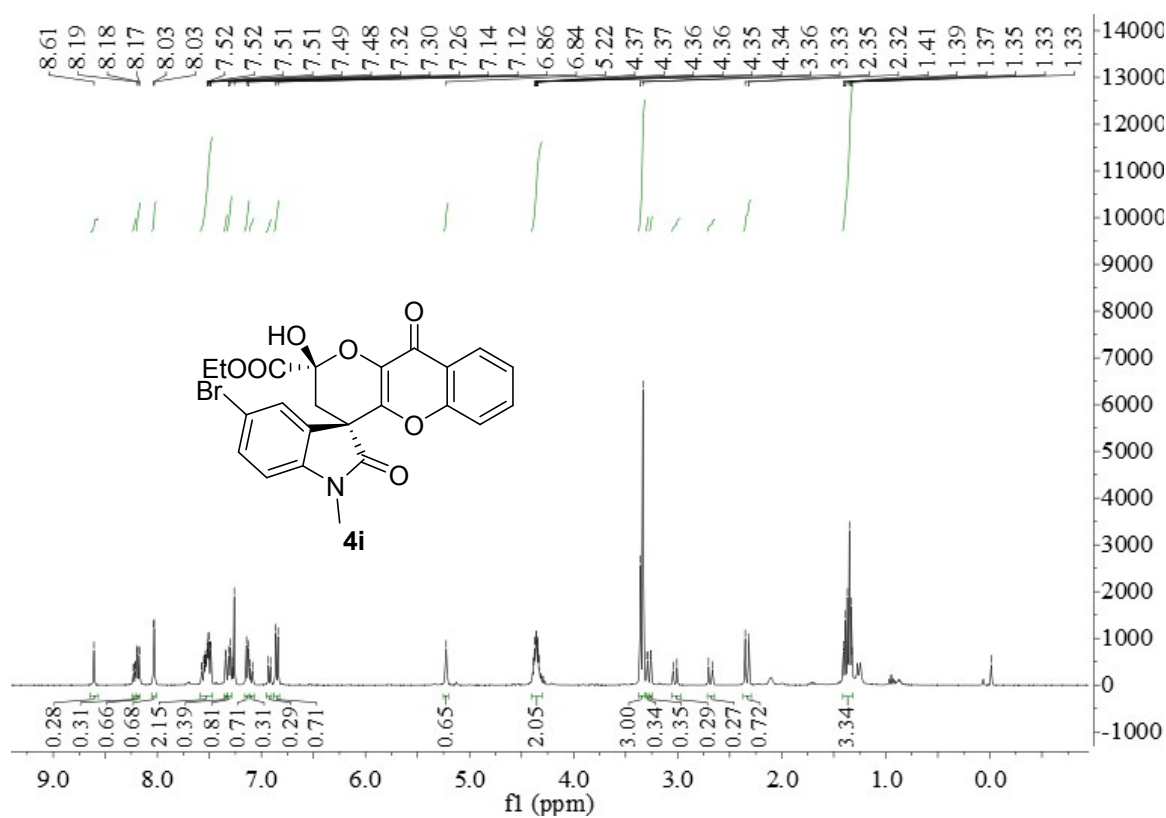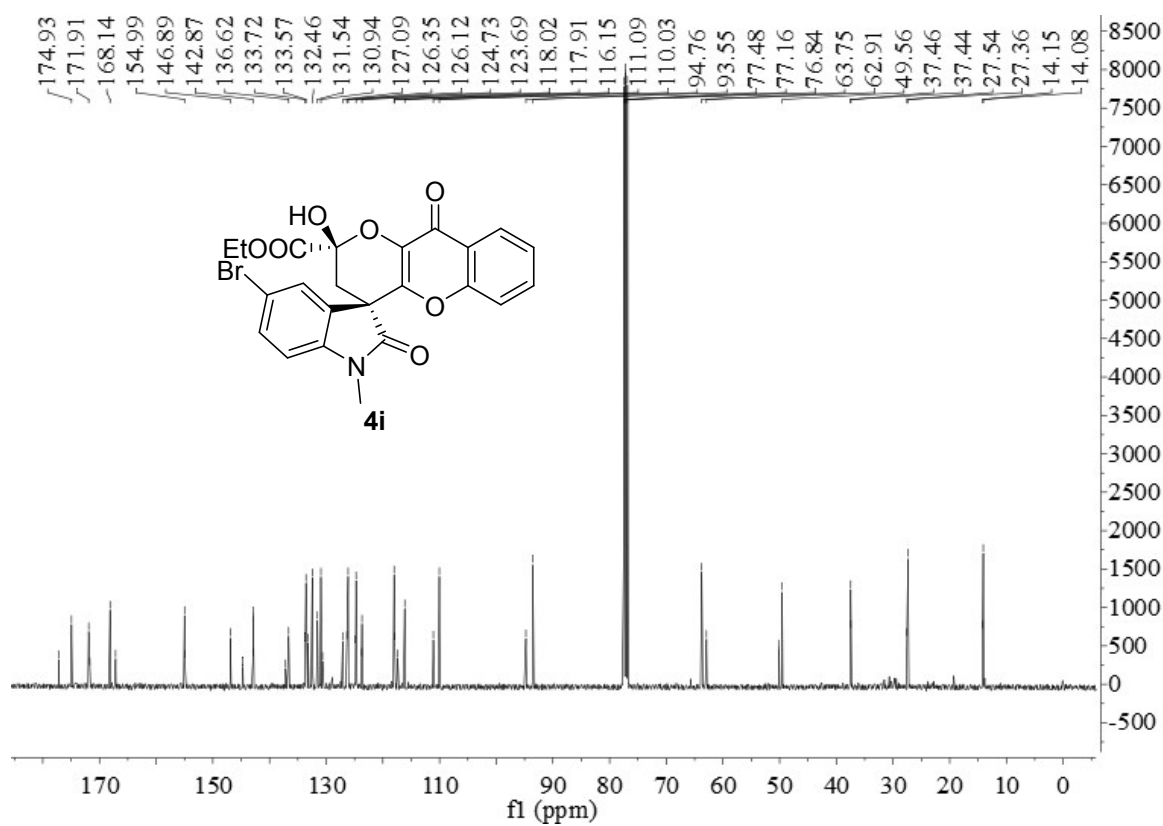

**Ethyl 2'-hydroxy-1,5-dimethyl-2,10'-dioxo-2',3'-dihydro-10'H-spiro**

**[indoline-3,4'-pyrano[3,2-*b*]chromene]-2'-carboxylate 4j**

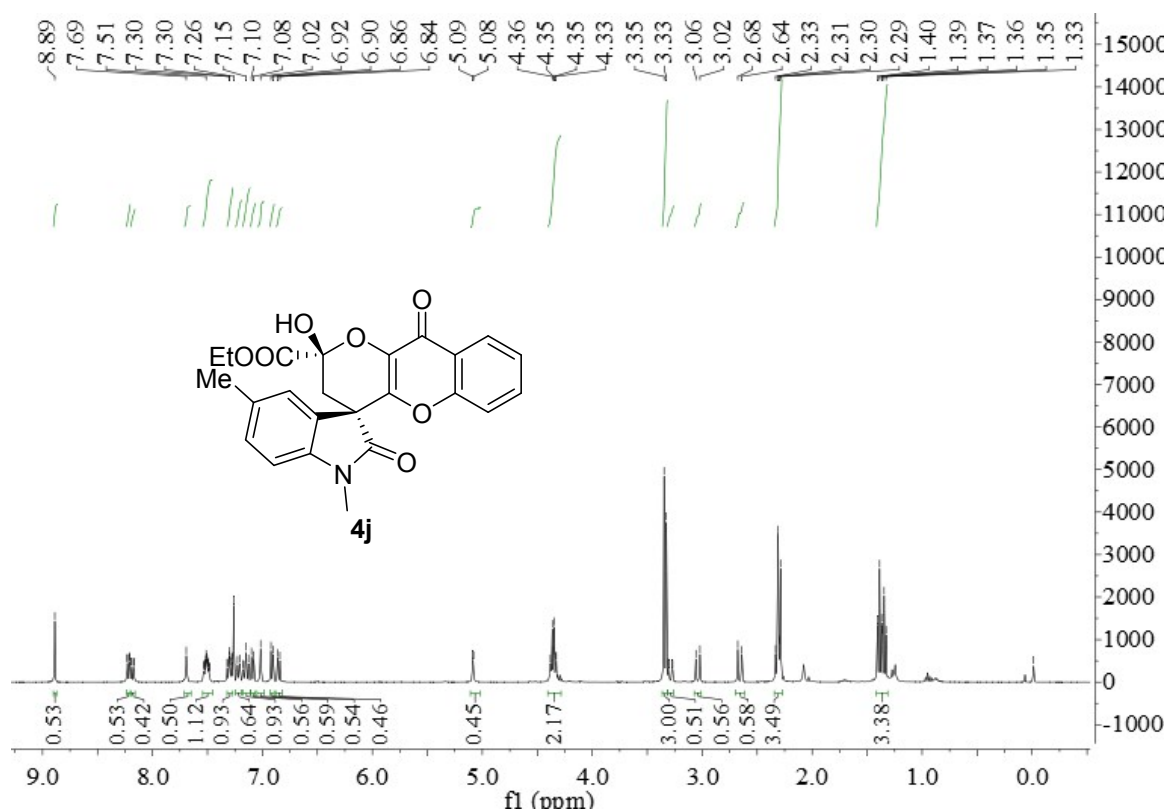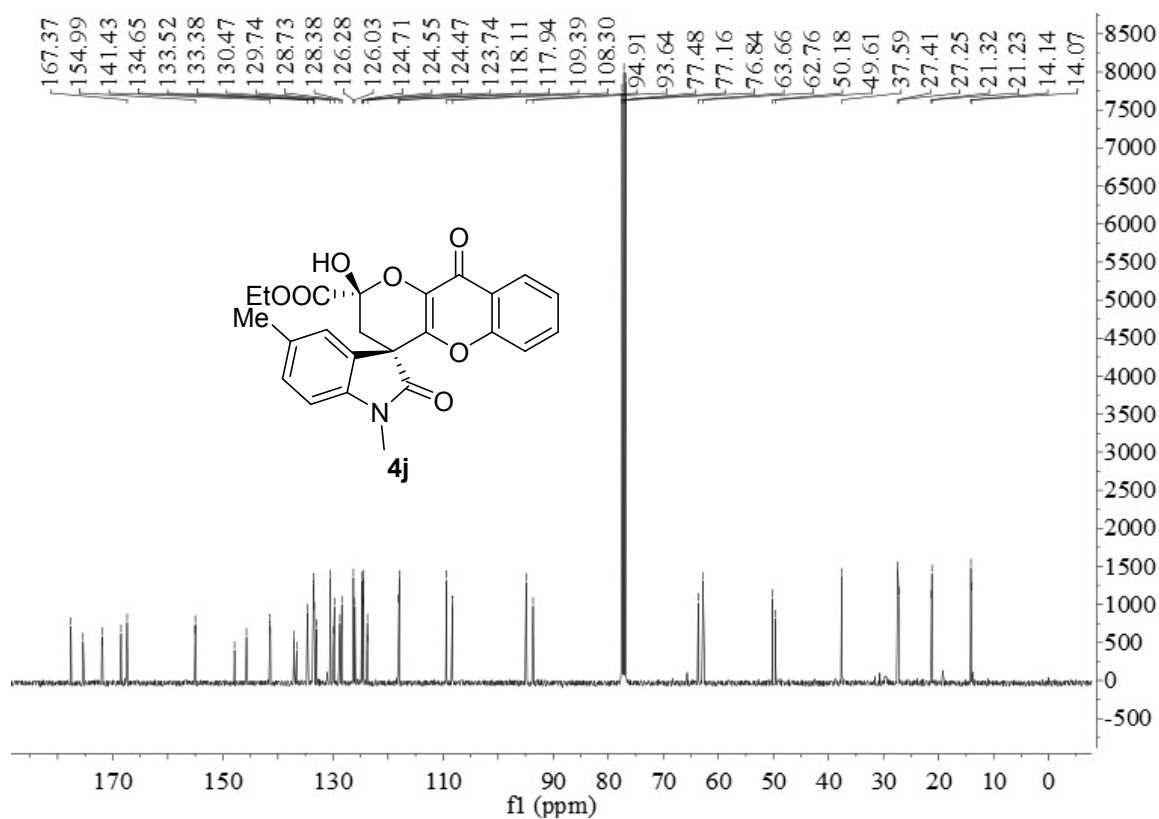

**Ethyl 2'-hydroxy-5-methoxy-1-methyl-2,10'-dioxo-2',3'-dihydro-10'H-spiro**

**[indoline-3,4'-pyrano[3,2-*b*]chromene]-2'-carboxylate 4k**

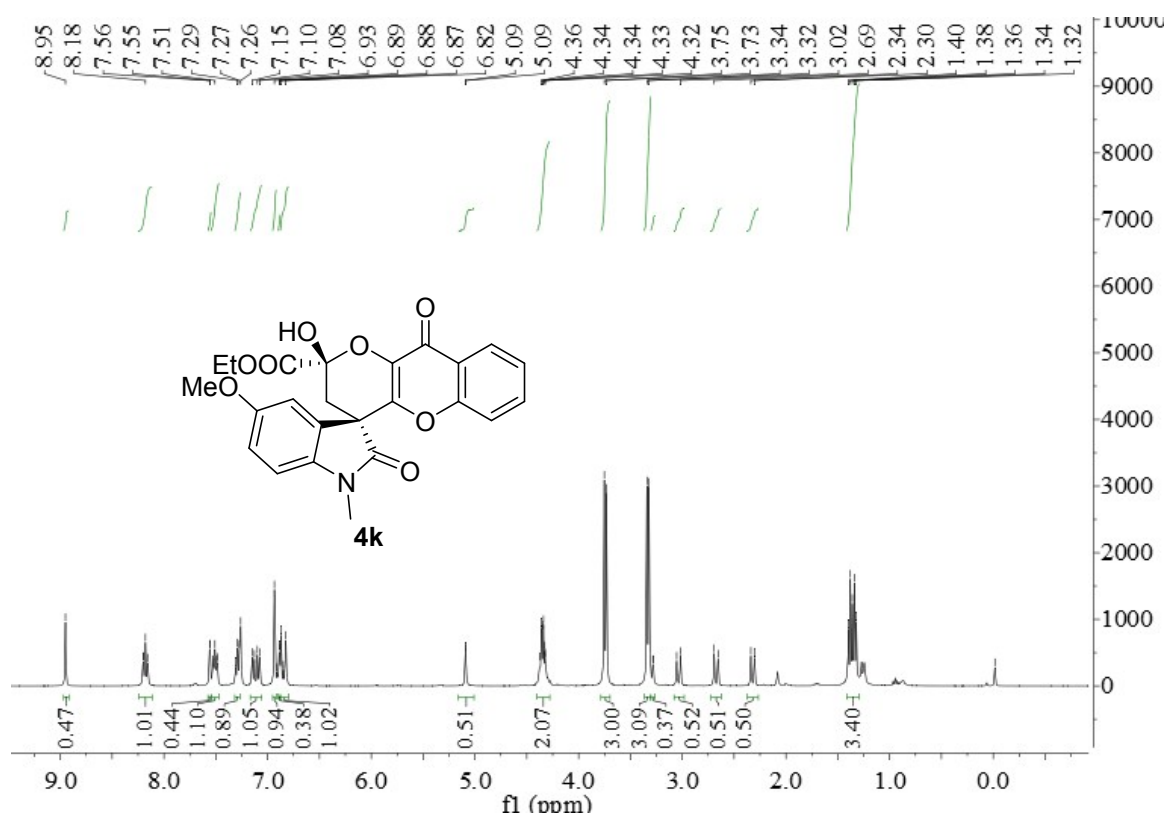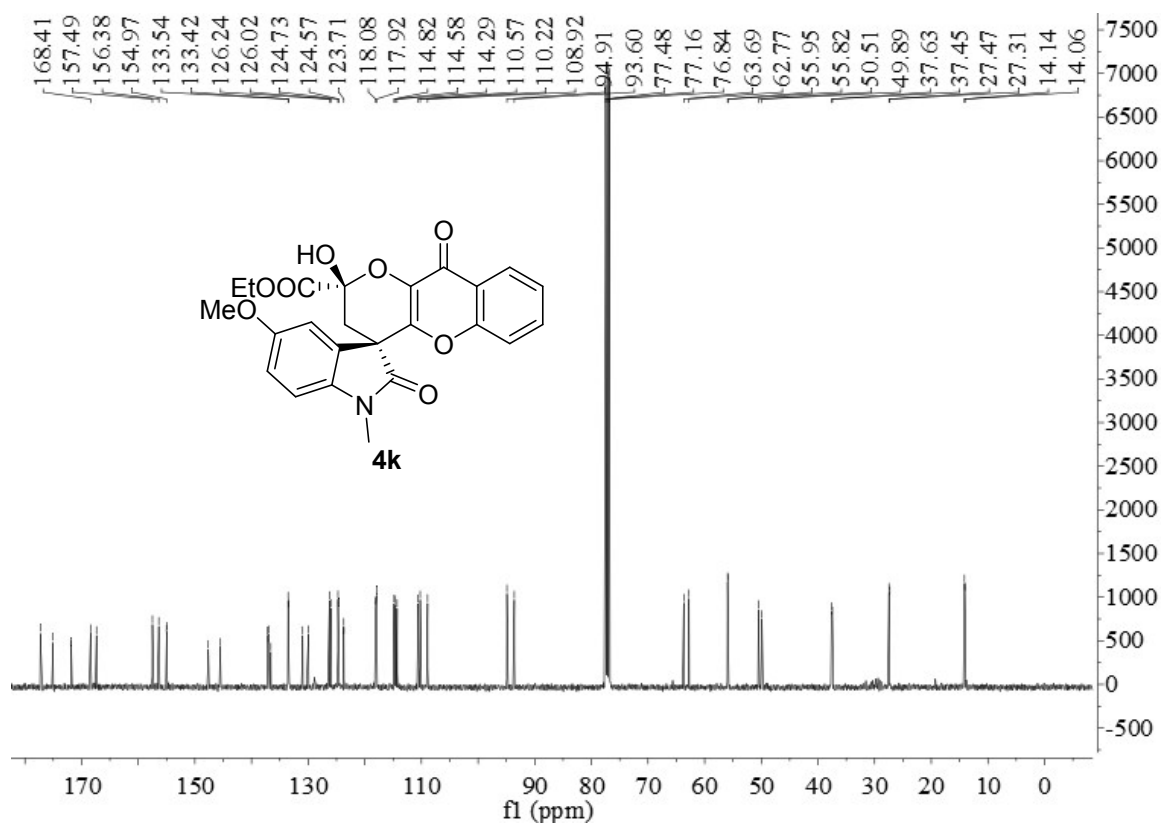

**Ethyl 6-chloro-2'-hydroxy-1-methyl-2,10'-dioxo-2',3'-dihydro-10'H-spiro**

**[indoline-3,4'-pyrano[3,2-*b*]chromene]-2'-carboxylate 4I**

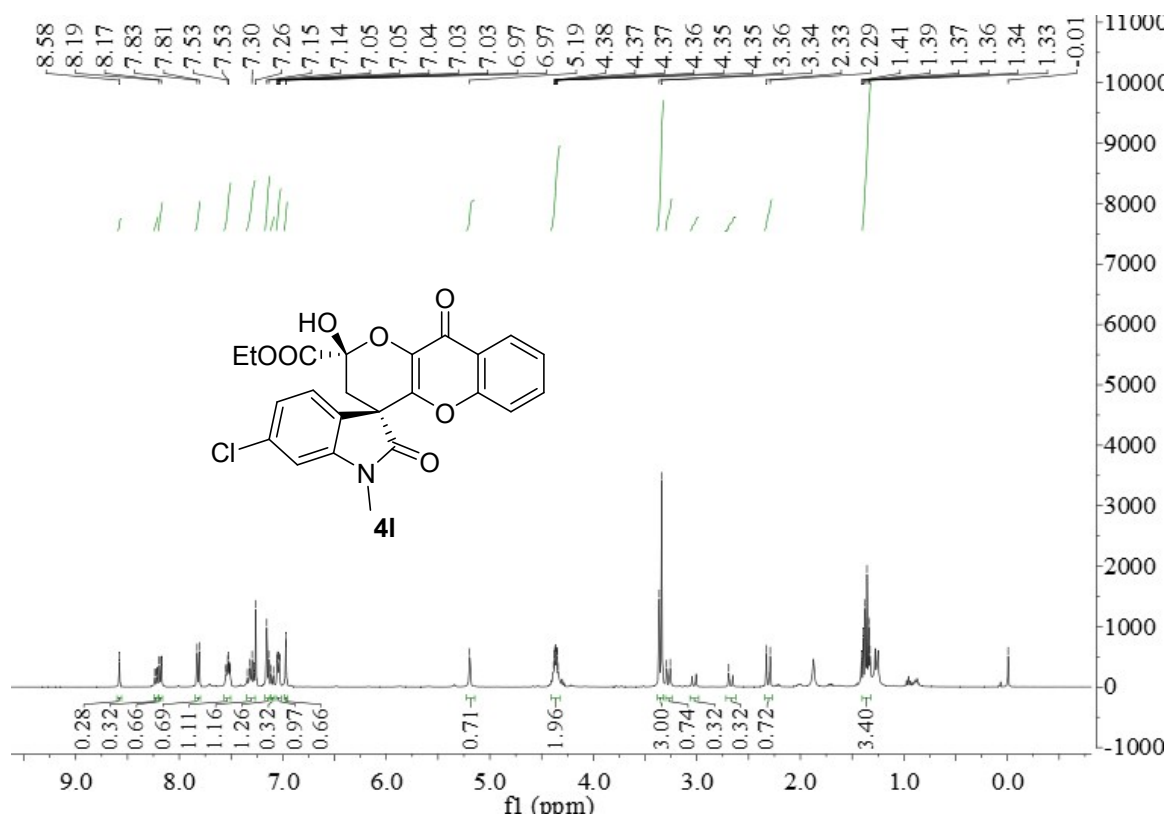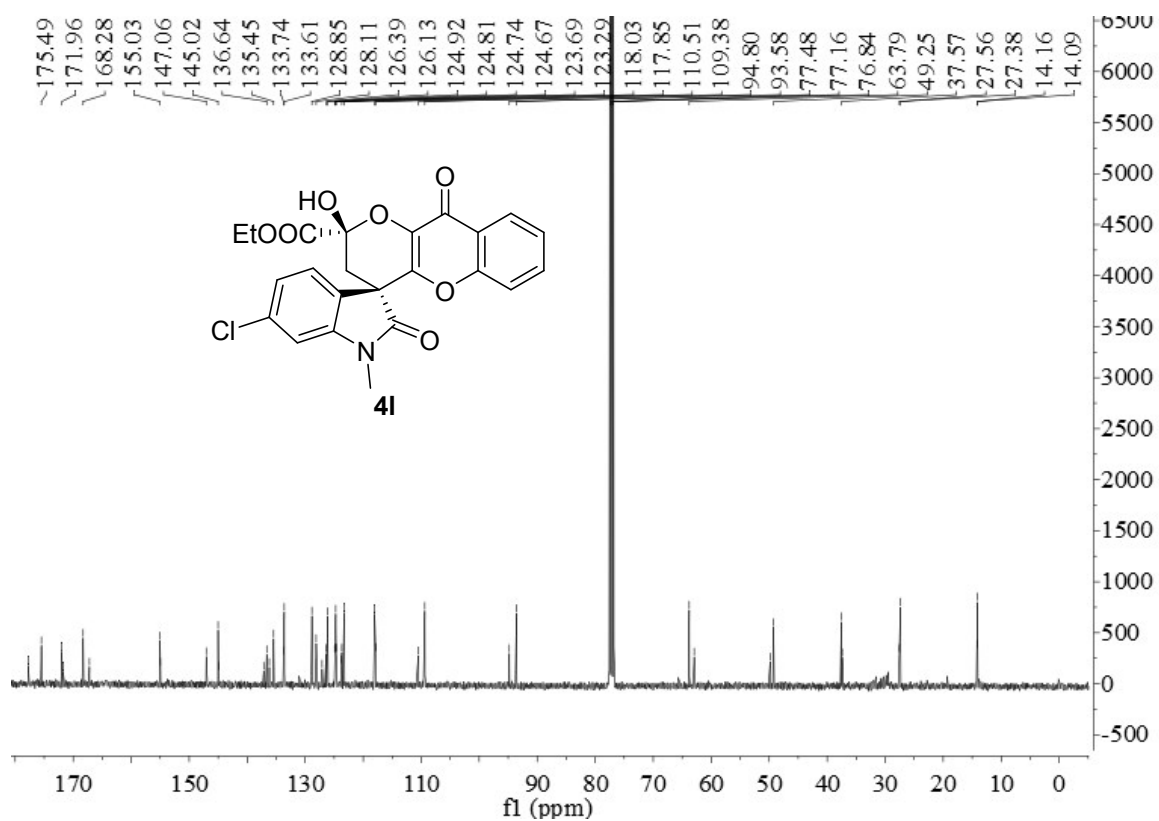

**Ethyl 6-bromo-2'-hydroxy-1-methyl-2,10'-dioxo-2',3'-dihydro-10'H-spiro**



**[indoline-3,4'-pyrano[3,2-*b*]chromene]-2'-carboxylate 4m**

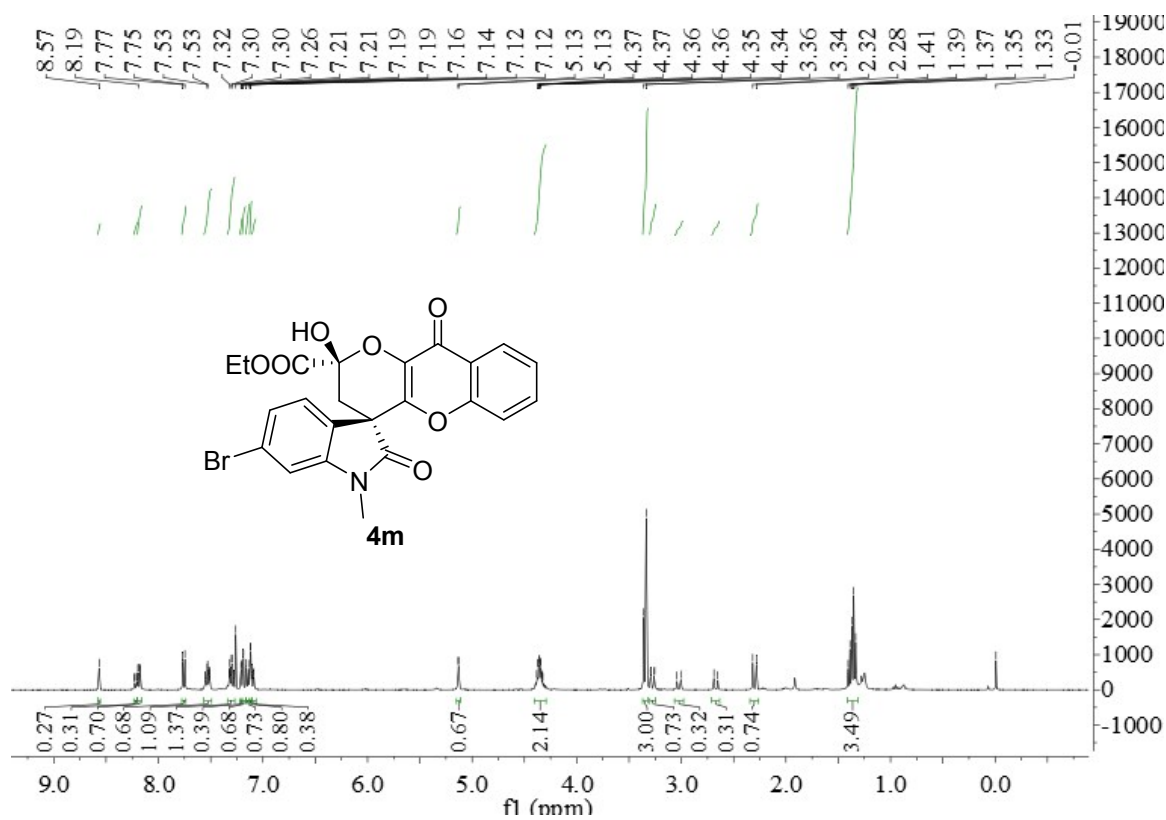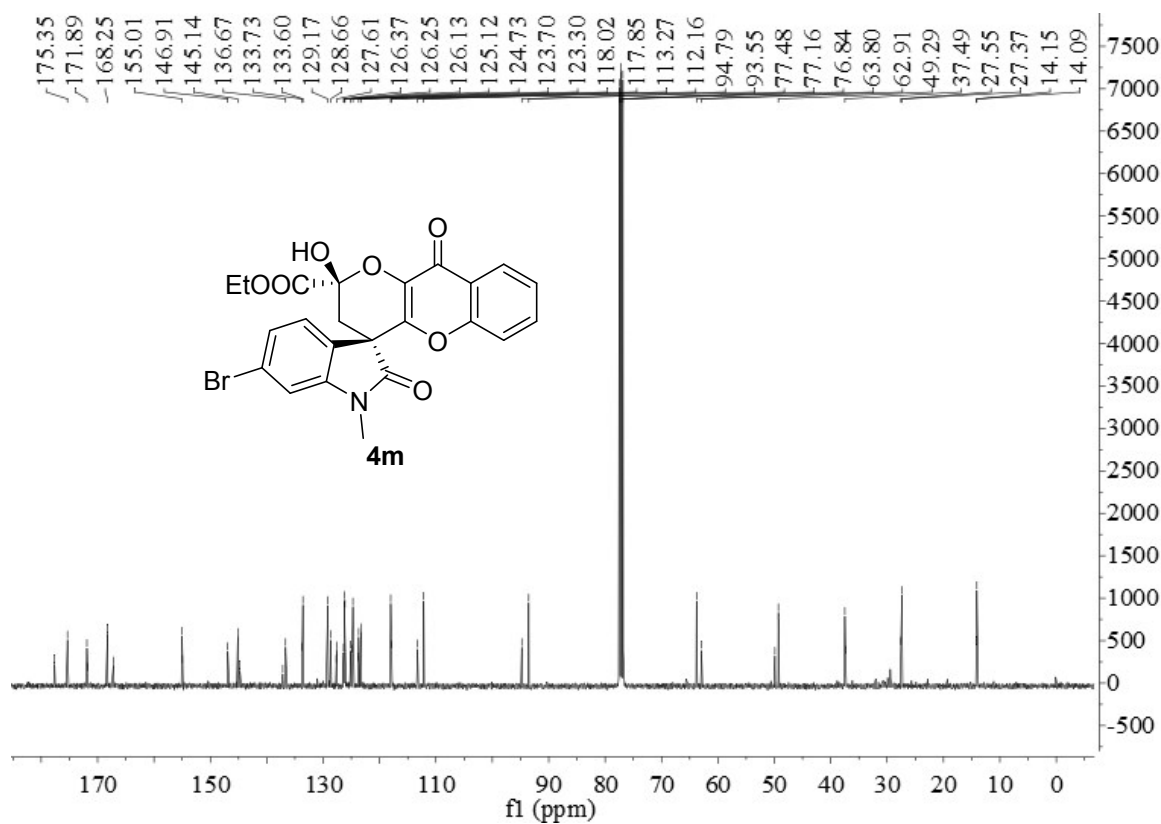

**Ethyl 2'-hydroxy-6-methoxy-1-methyl-2,10'-dioxo-2',3'-dihydro-10'H-spiro**

**[indoline-3,4'-pyrano[3,2-*b*]chromene]-2'-carboxylate 4n**

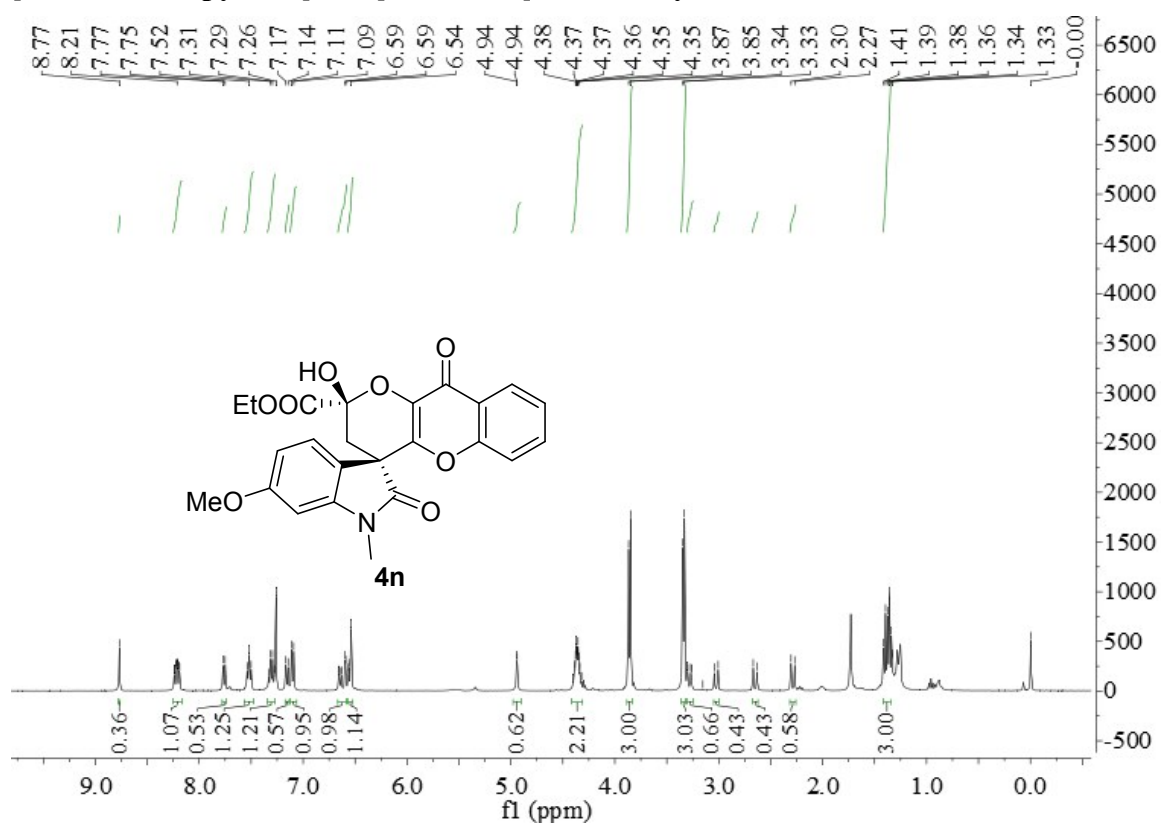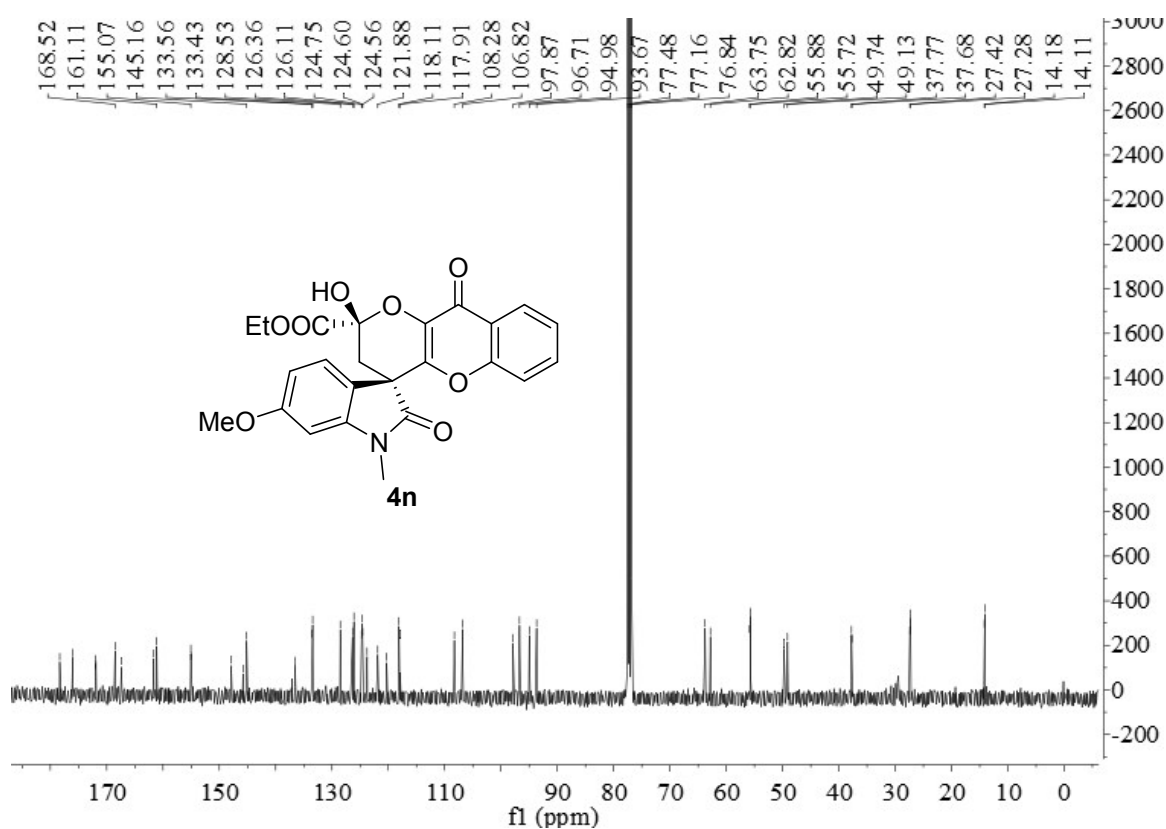

**Ethyl 7-fluoro-2'-hydroxy-1-methyl-2,10'-dioxo-2',3'-dihydro-10'H-spiro**

**[indoline-3,4'-pyrano[3,2-*b*]chromene]-2'-carboxylate 4o**

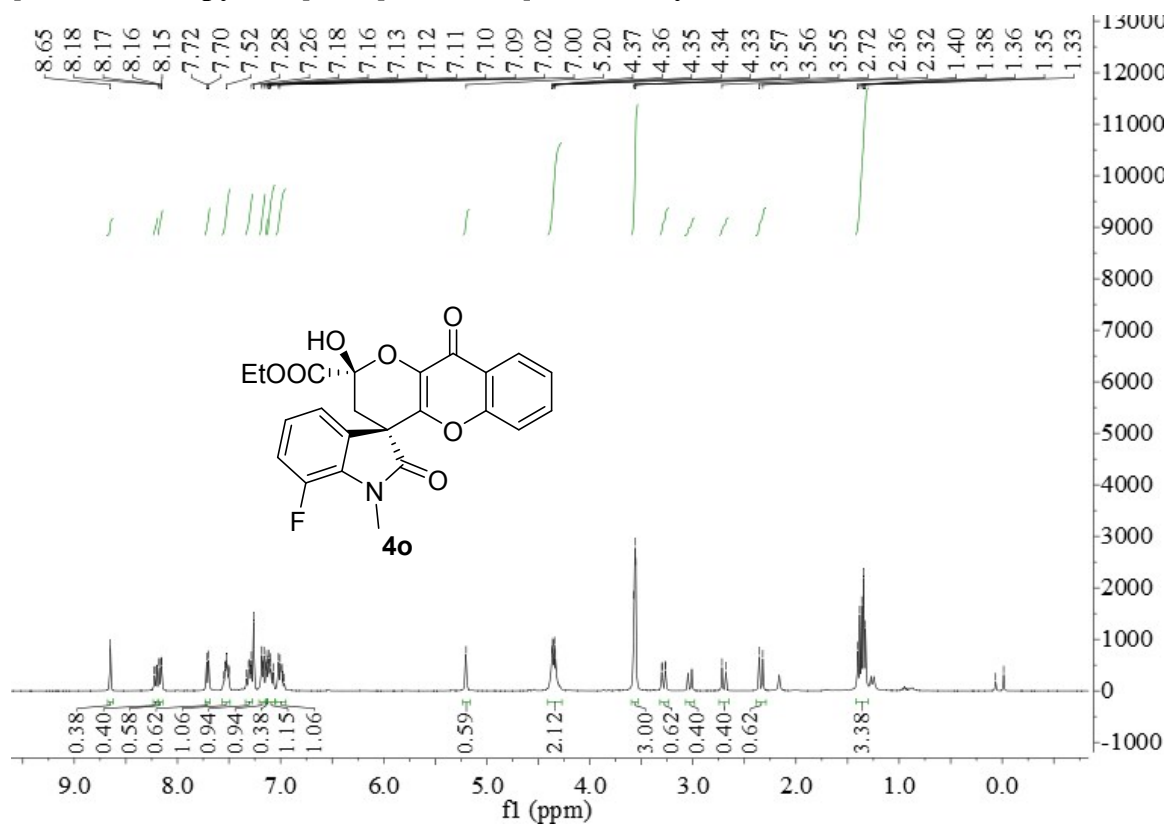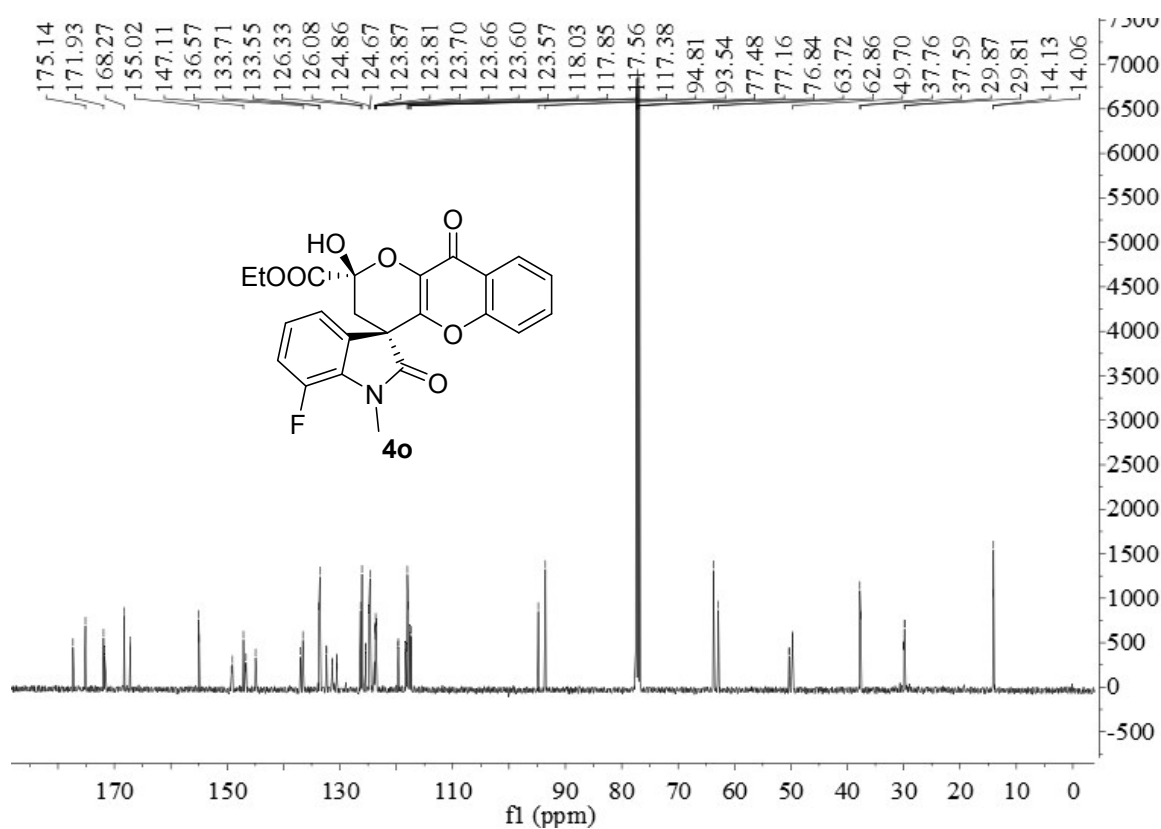

**Ethyl 2'-hydroxy-1,7-dimethyl-2,10'-dioxo-2',3'-dihydro-10'H-spiro**

**[indoline-3,4'-pyrano[3,2-*b*]chromene]-2'-carboxylate 4p**

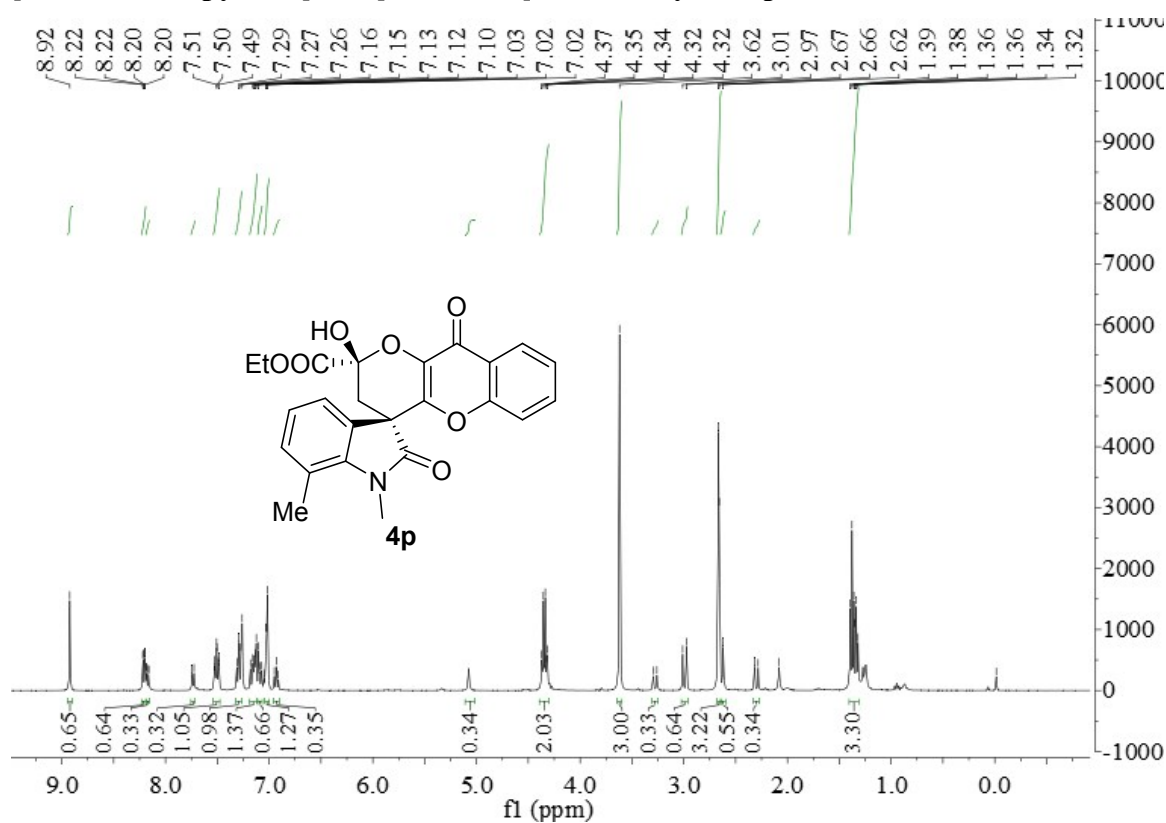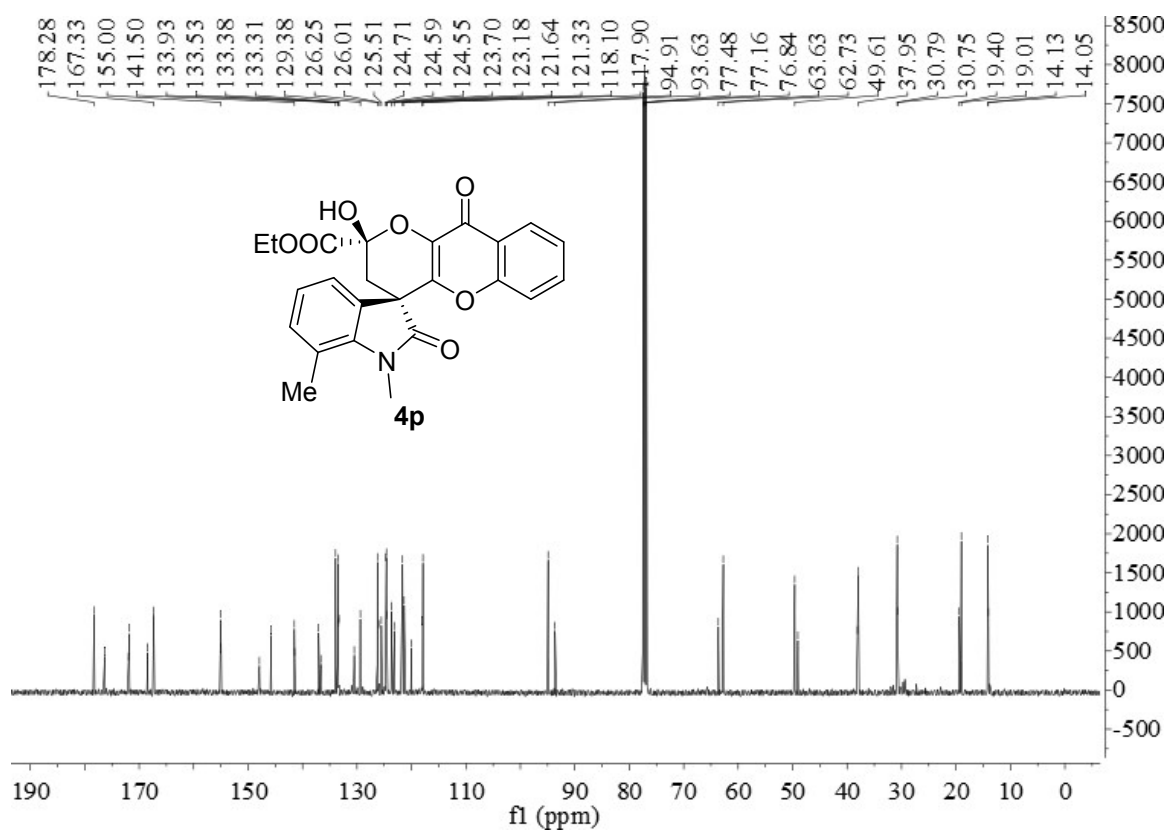

**Ethyl 2'-hydroxy-1,5,7-trimethyl-2,10'-dioxo-2',3'-dihydro-10'H-spiro**

**[indoline-3,4'-pyrano[3,2-*b*]chromene]-2'-carboxylate 4q**

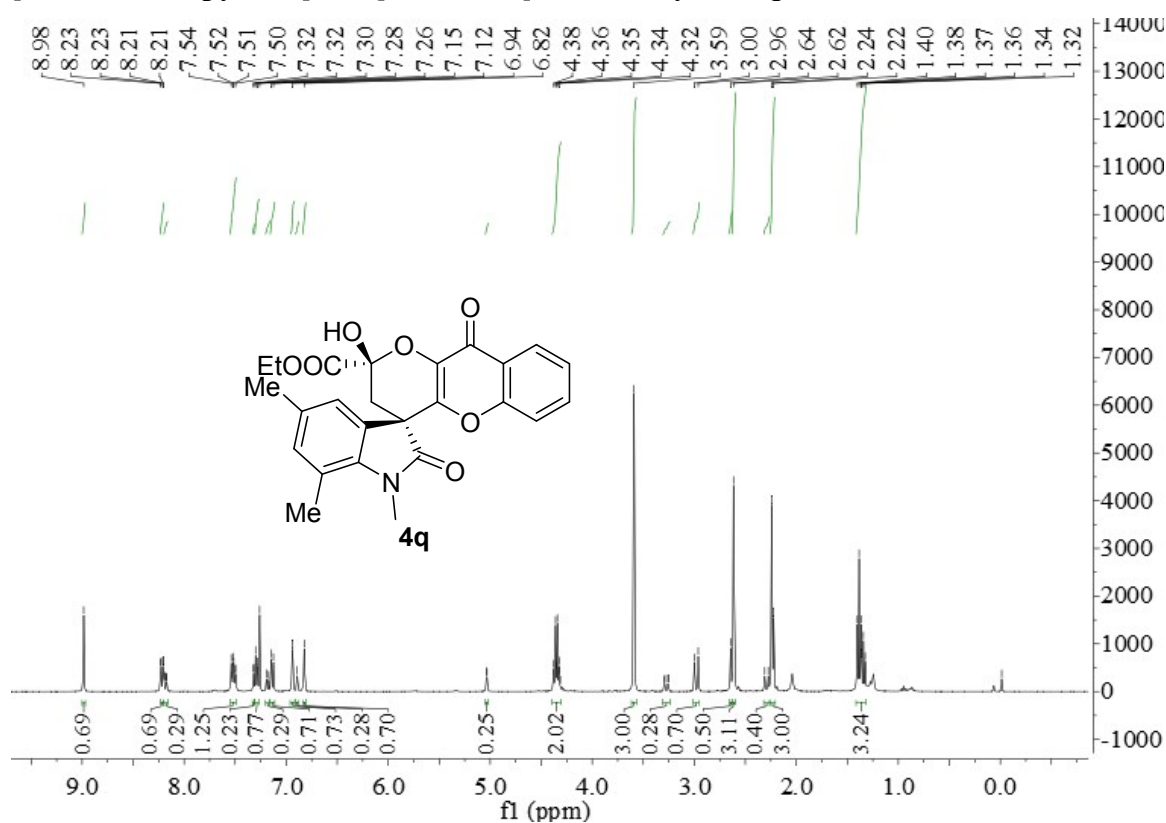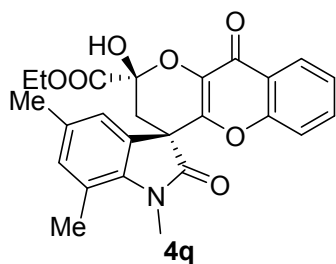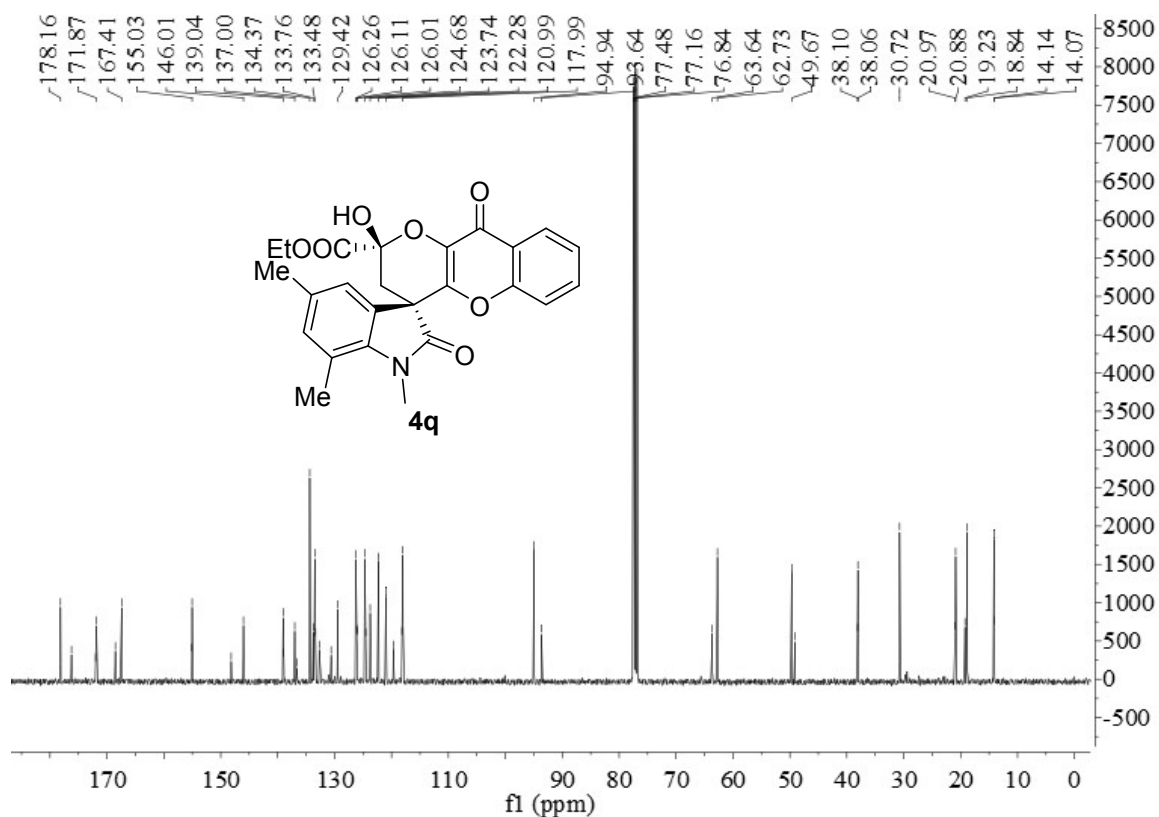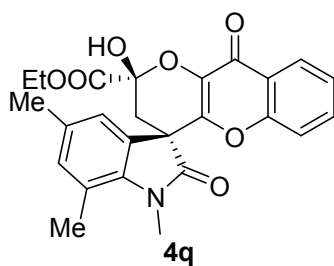

**Ethyl 5,6-difluoro-2'-hydroxy-1-methyl-2,10'-dioxo-2',3'-dihydro-10'H-spiro**

**[indoline-3,4'-pyrano[3,2-*b*]chromene]-2'-carboxylate 4r**

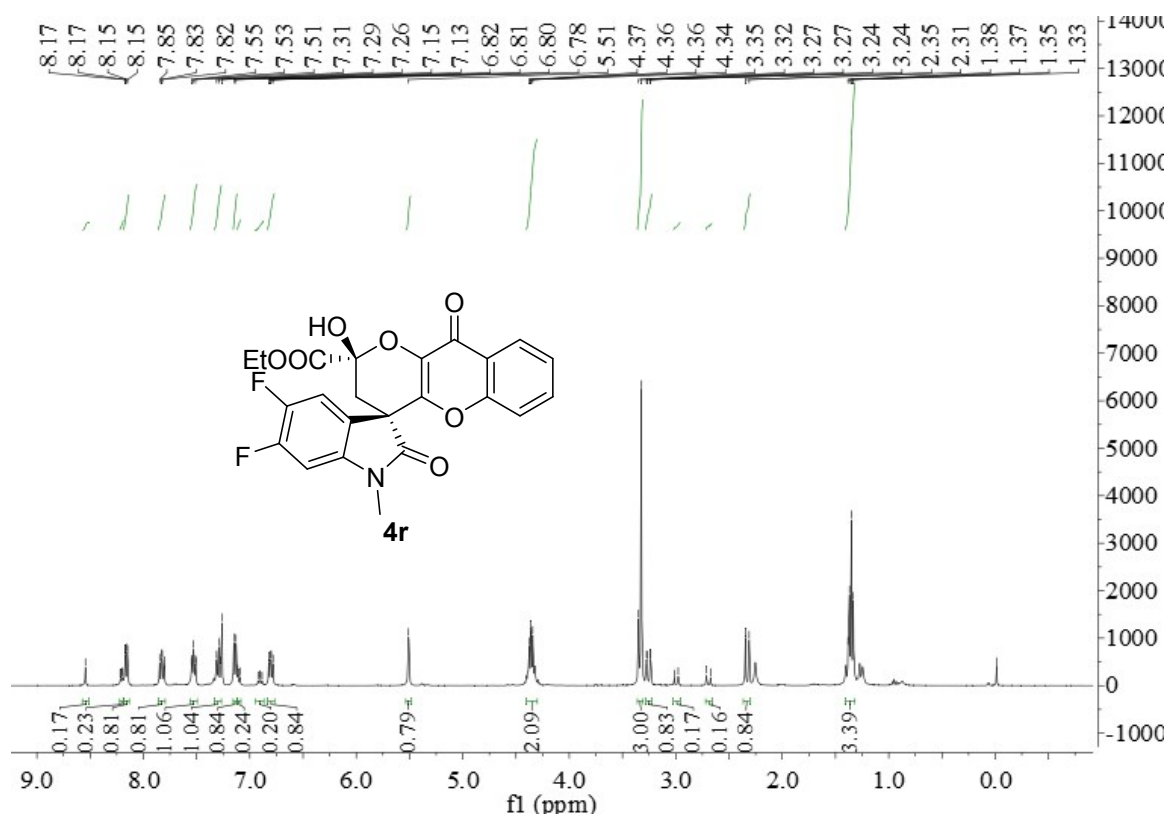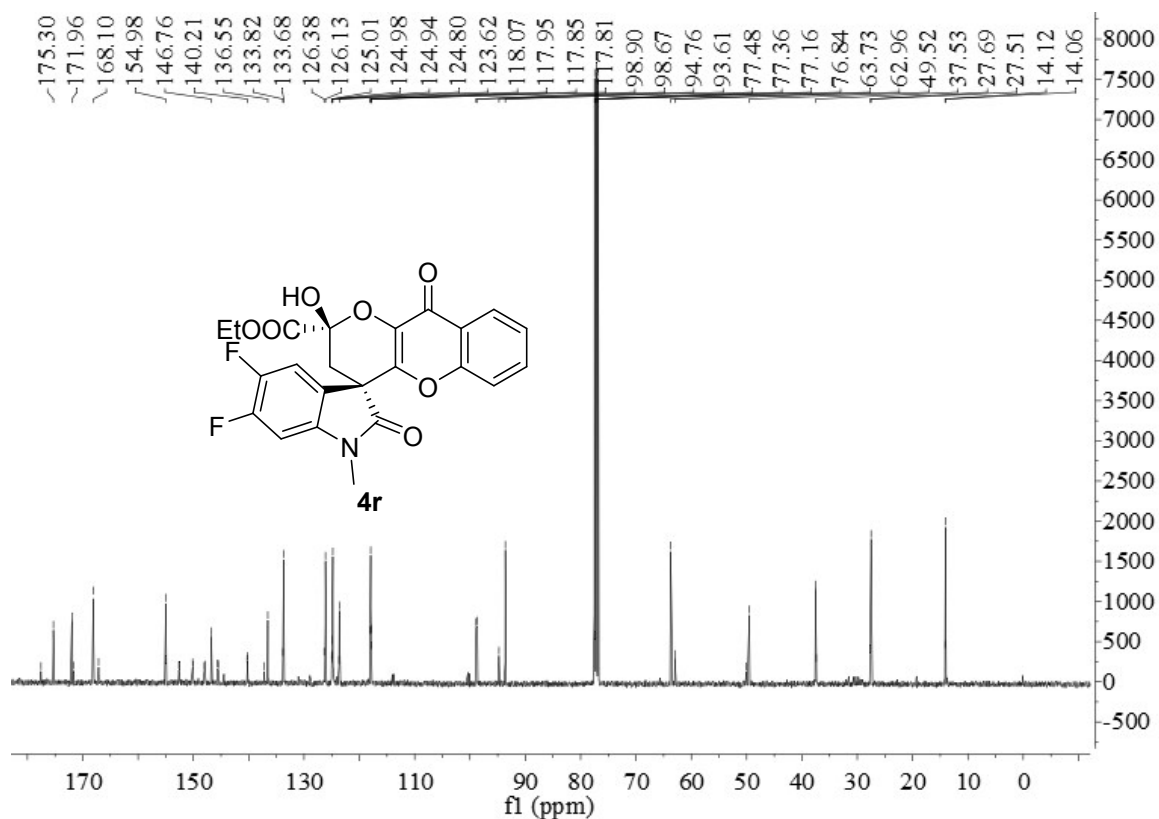

**Methyl 2'-hydroxy-1-methyl-2,10'-dioxo-2',3'-dihydro-10'H-spiro**

**[indoline-3,4'-pyrano[3,2-*b*]chromene]-2'-carboxylate 4s**

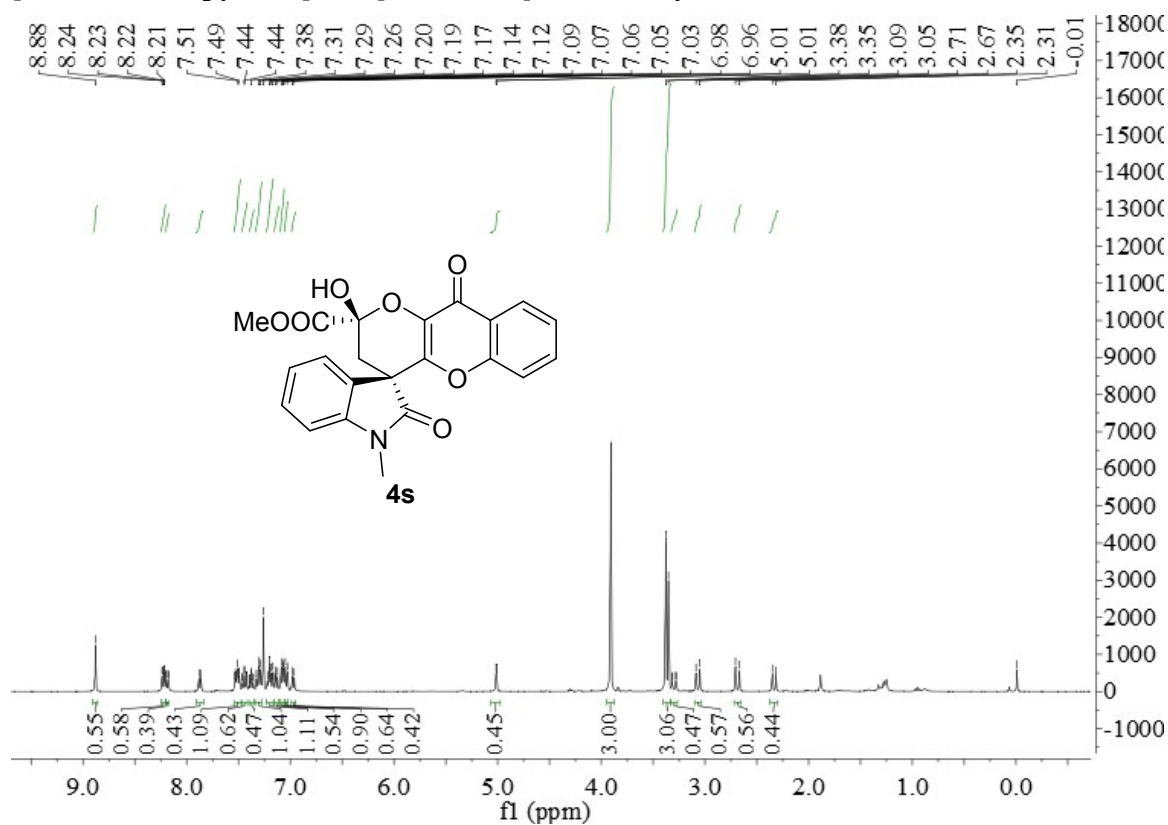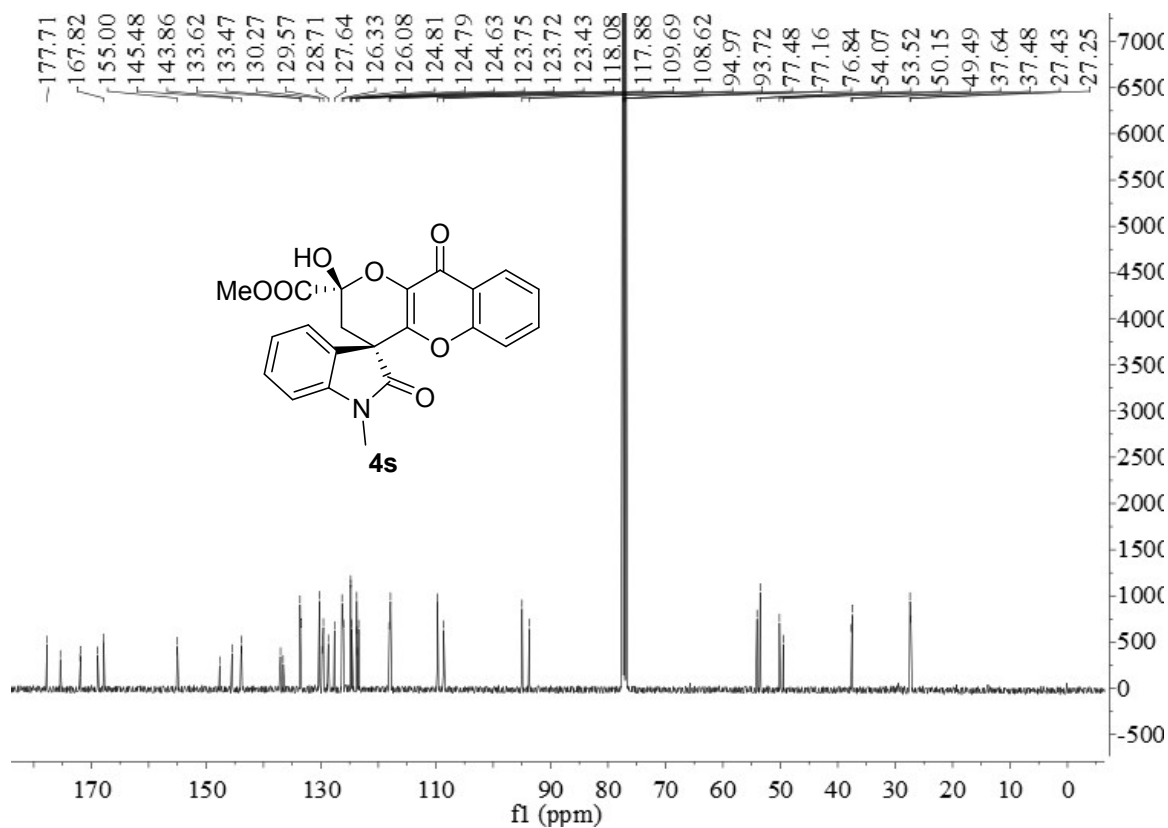

**Ethyl 8'-fluoro-2'-hydroxy-1-methyl-2,10'-dioxo-2',3'-dihydro-10'H-spiro**

**[indoline-3,4'-pyrano[3,2-*b*]chromene]-2'-carboxylate 4t**

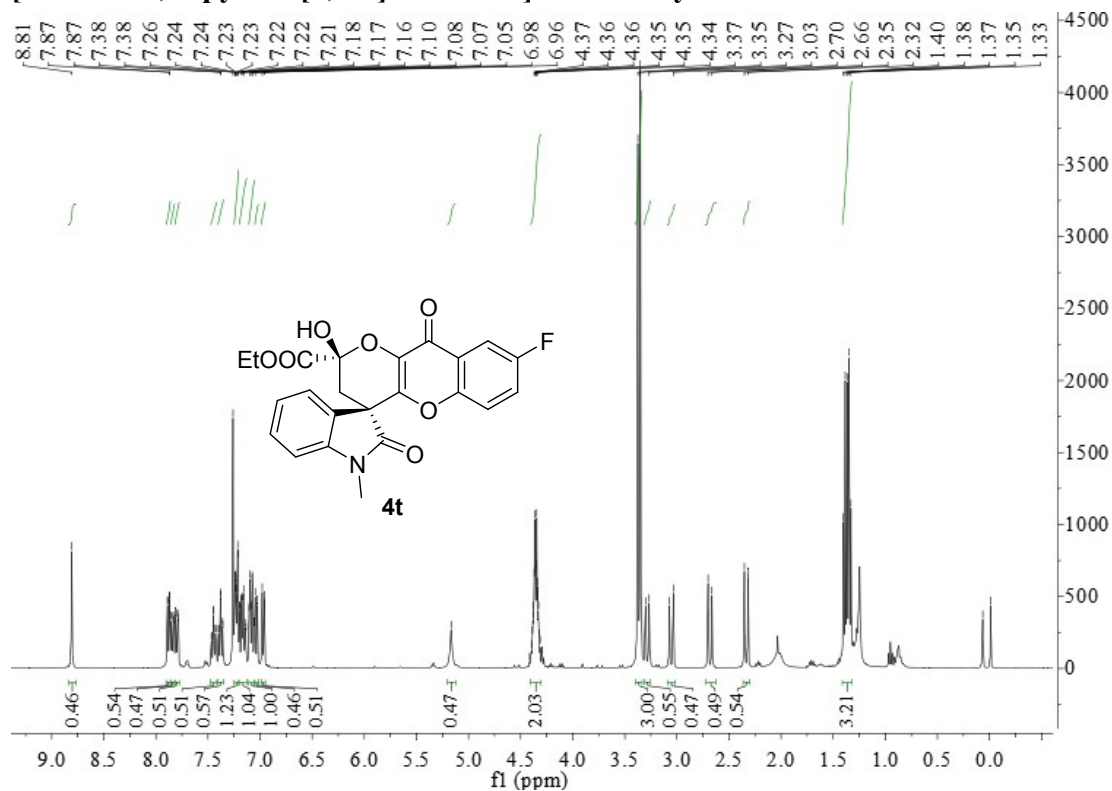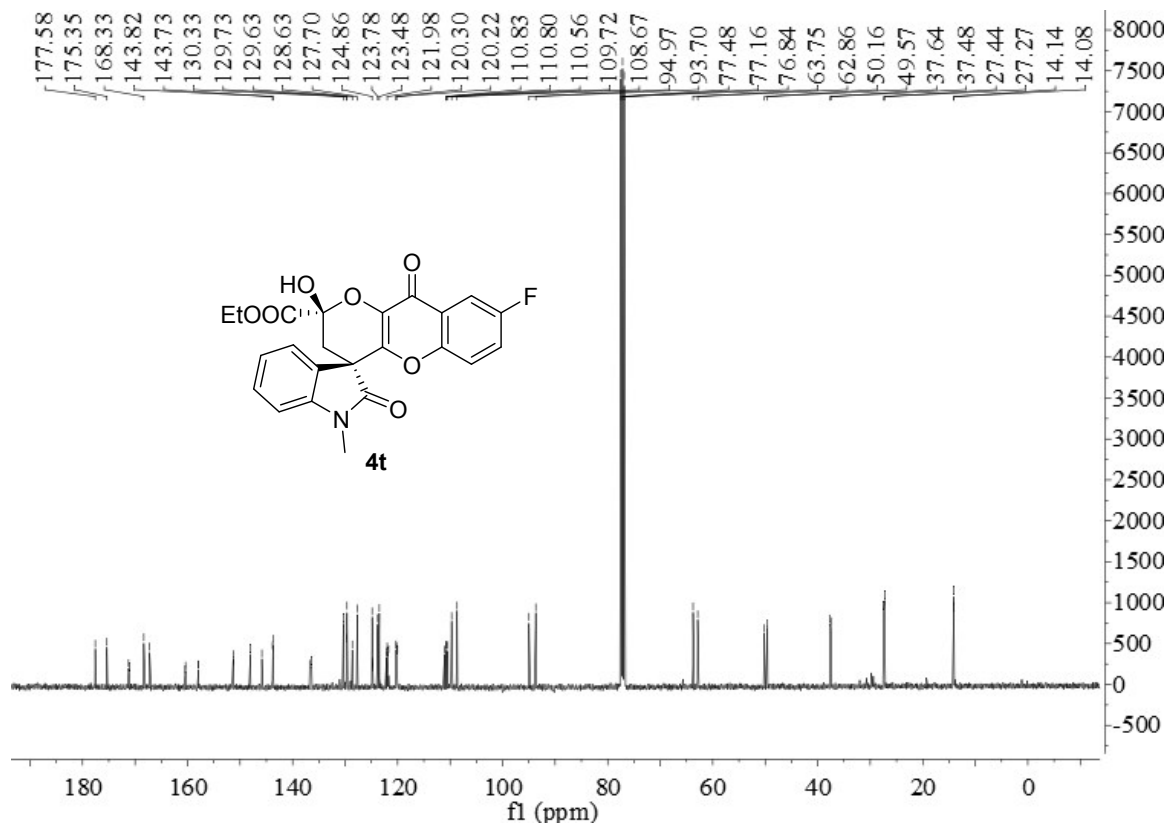

**Ethyl 8'-bromo-2'-hydroxy-1-methyl-2,10'-dioxo-2',3'-dihydro-10'H-spiro**



**[indoline-3,4'-pyrano[3,2-*b*]chromene]-2'-carboxylate 4u**

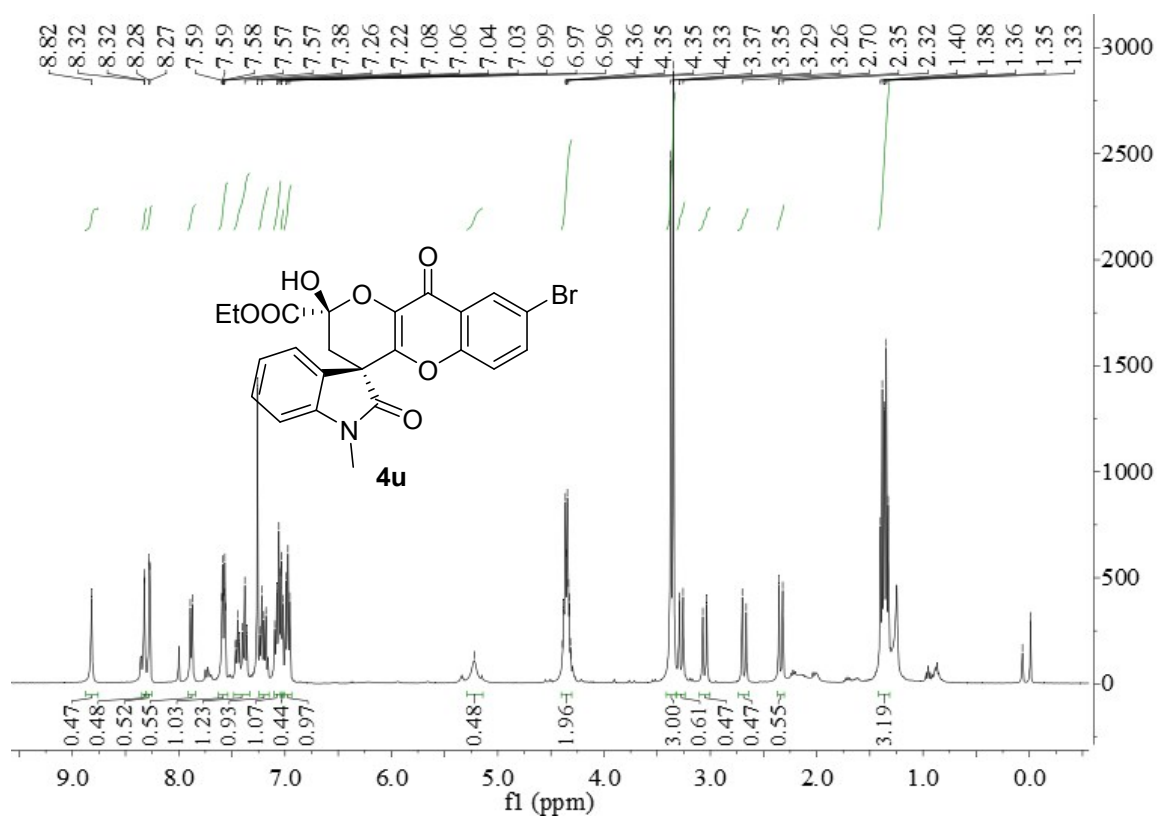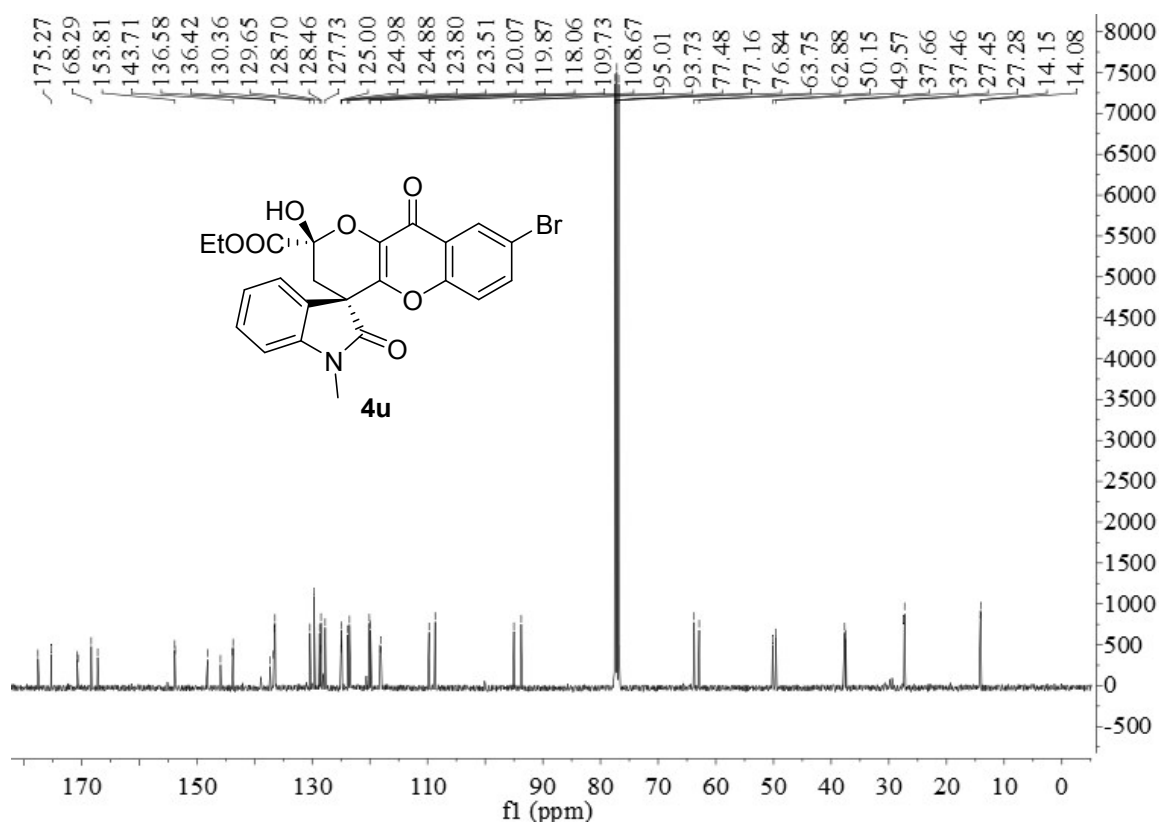

**Ethyl 2'-hydroxy-1,8'-dimethyl-2,10'-dioxo-2',3'-dihydro-10'H-spiro**

**[indoline-3,4'-pyrano[3,2-*b*]-chromene]-2'-carboxylate 4v**

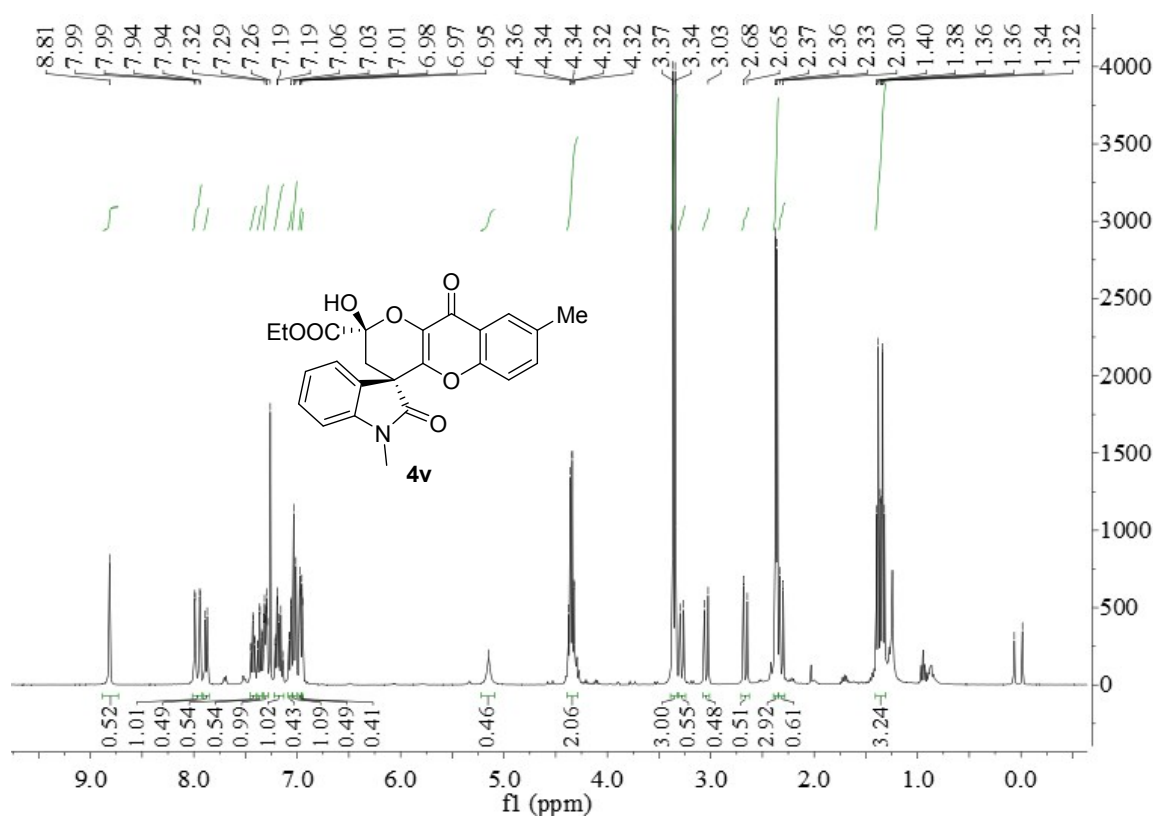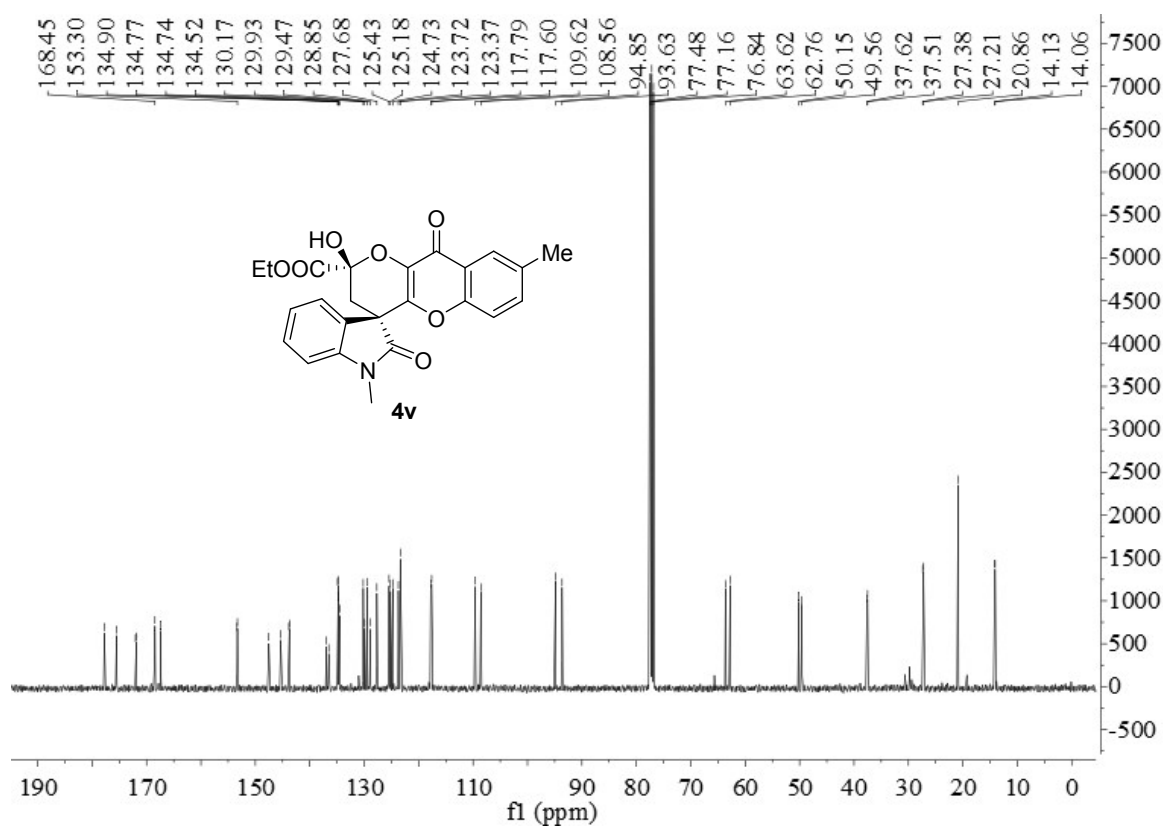

**Ethyl2'-hydroxy-7'-methoxy-1-methyl-2,10'-dioxo-2',3'-dihydro-10'H-**

spiro[indoline-3,4'-pyrano[3,2-b]chromene]-2'-carboxylate 4w

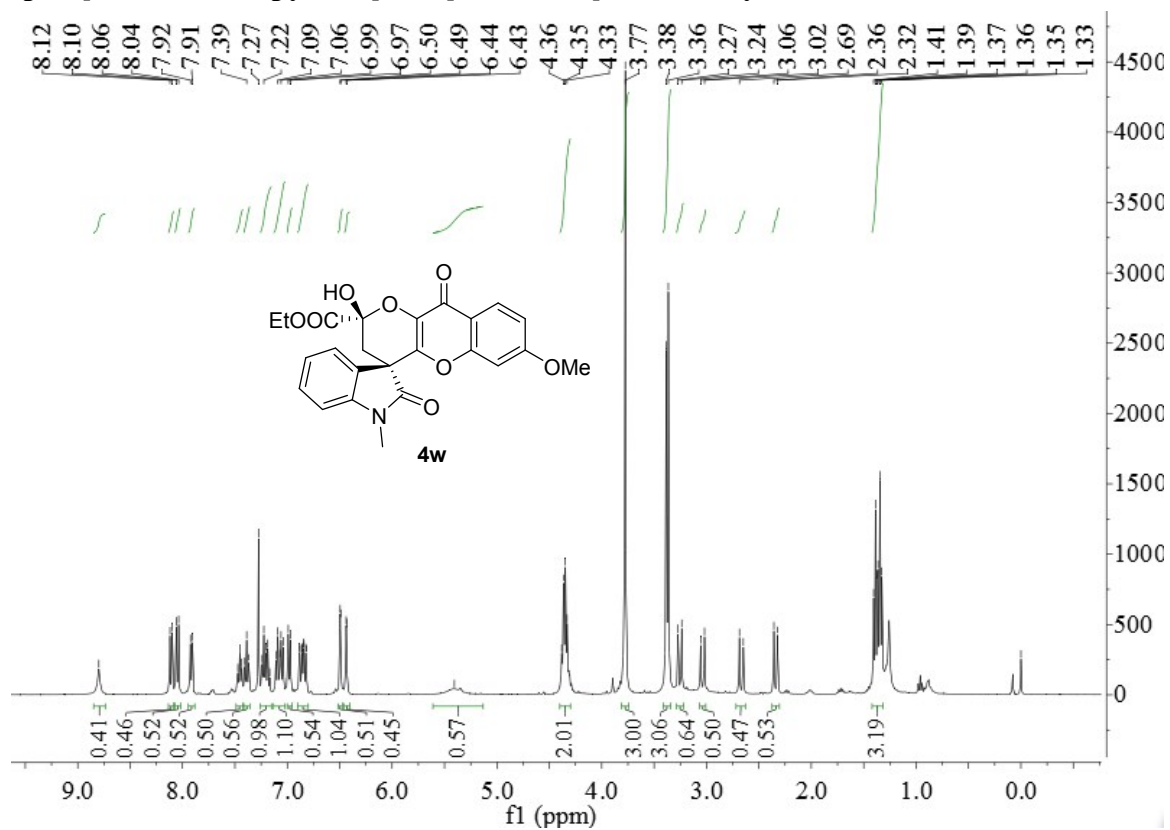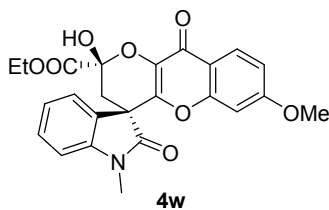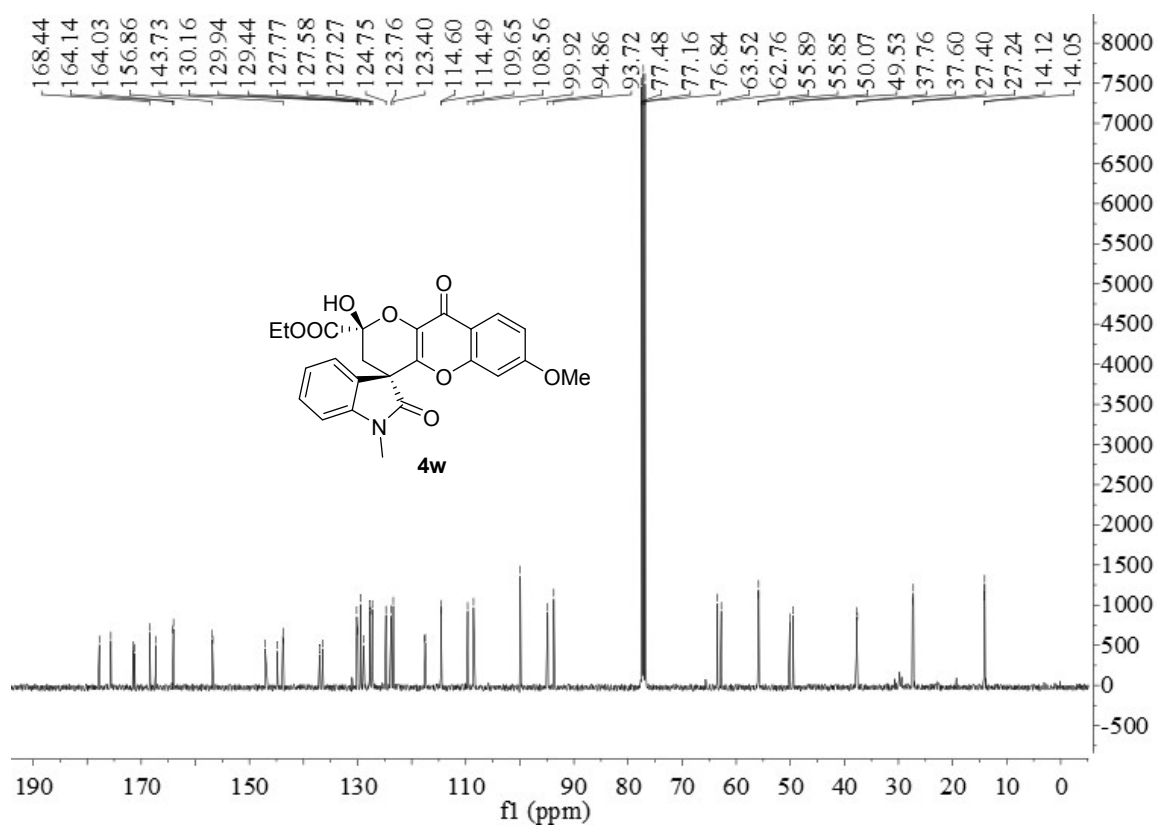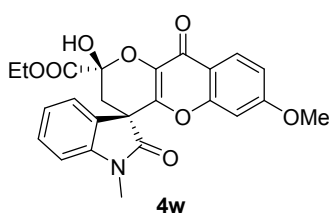

**Ethyl-2-hydroxy-1'-methyl-2',5,10-trioxo-2,3,5,10-tetrahydrospiro[benzo[g]chromene-4,3'-indoline]-2-carboxylate 6a**

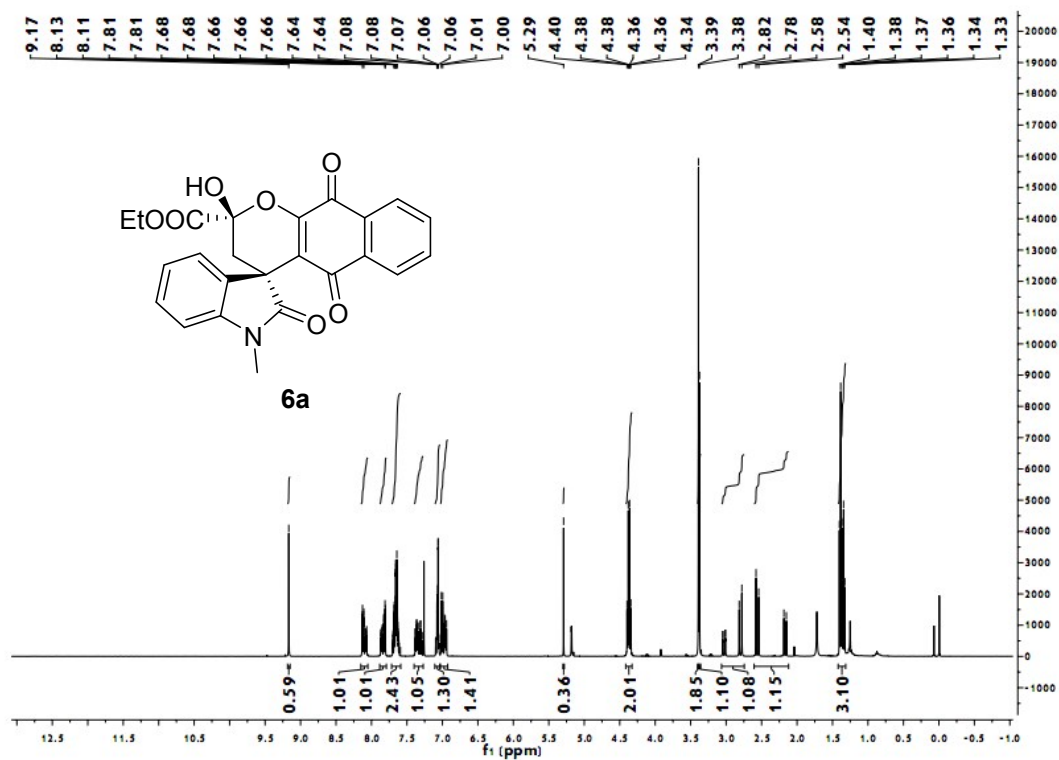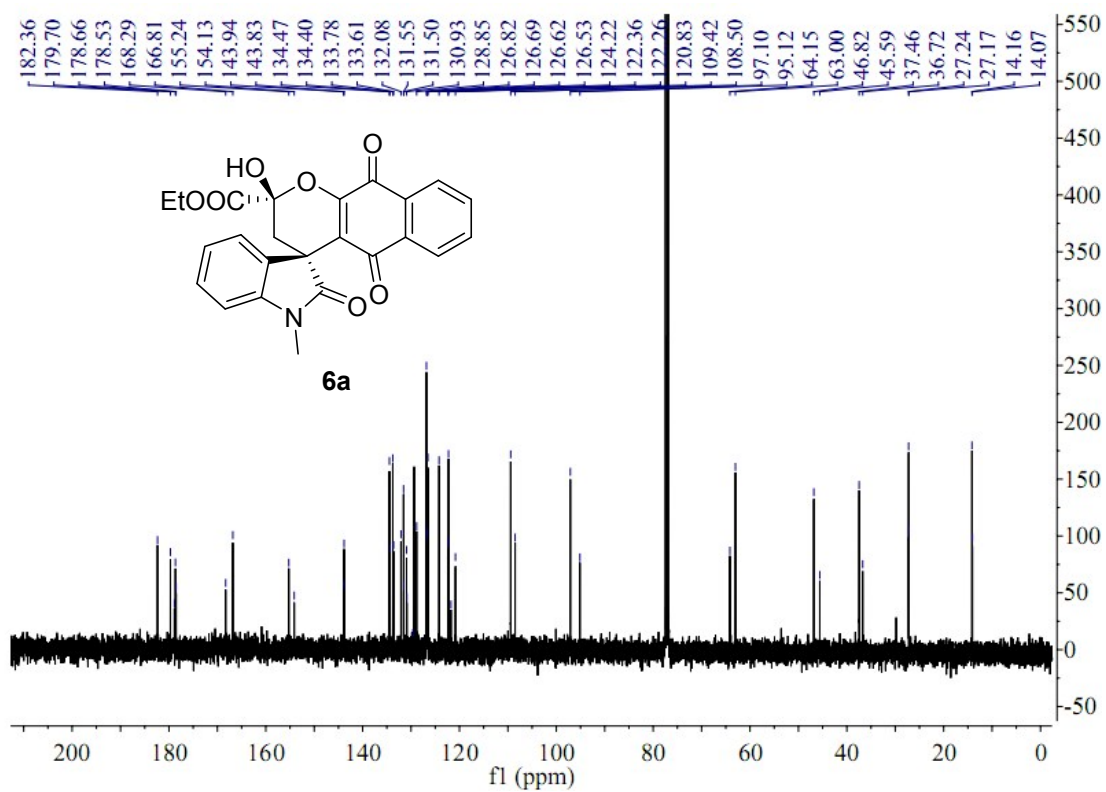

**Ethyl-2-hydroxy-1'-(methoxymethyl)-2',5,10-trioxo-2,3,5,10-tetrahydrospiro[benzo[g]chromene-4,3'-indoline]-2-carboxylate 6b**

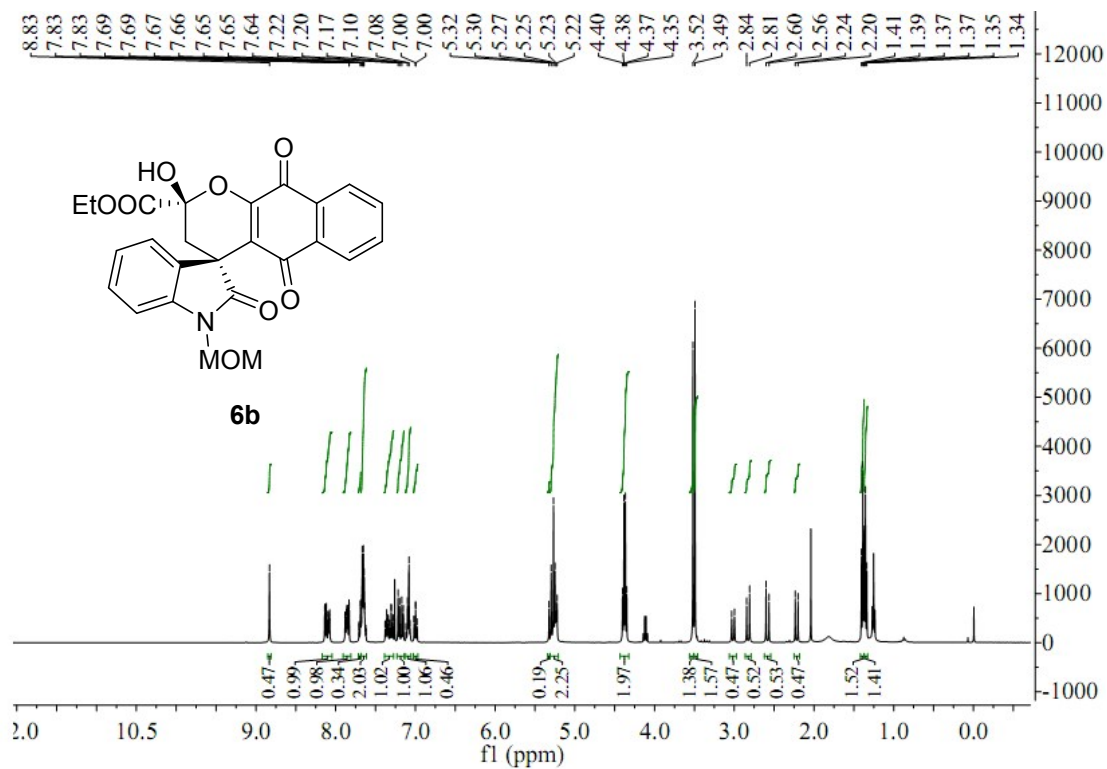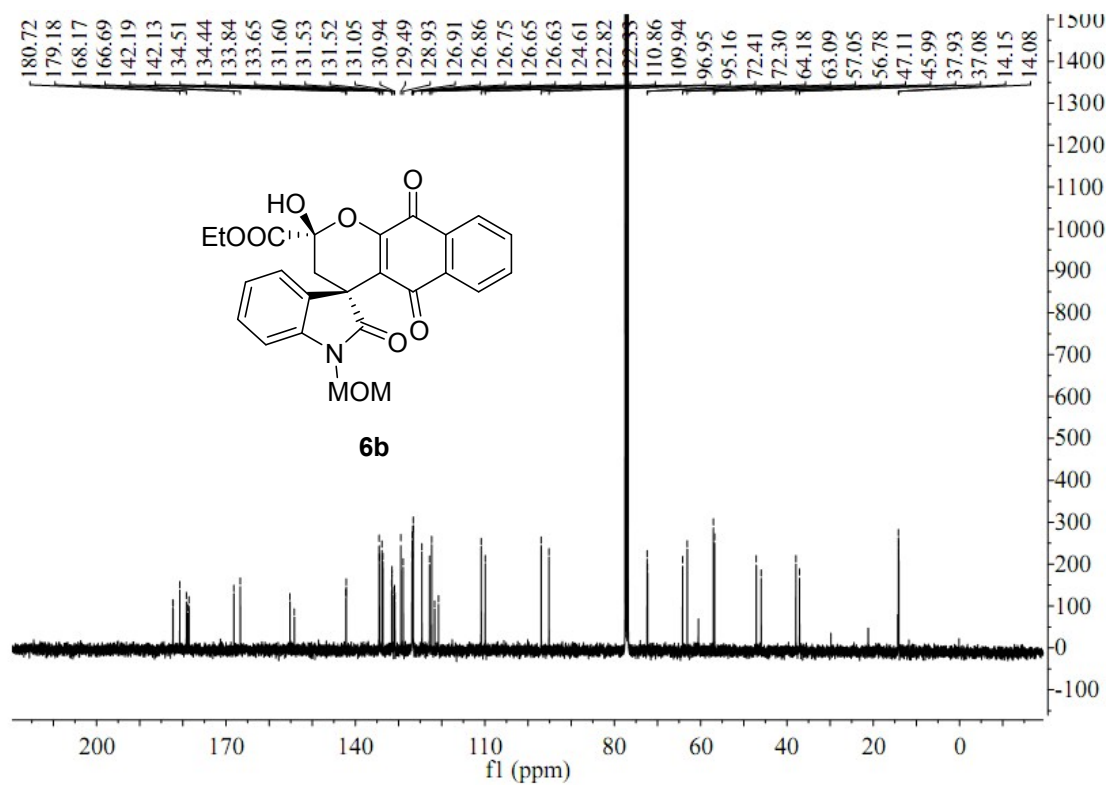

**Ethyl-1'-benzyl-2-hydroxy-2',5,10-trioxo-2,3,5,10-tetrahydrospiro[benzo[g]chromene-4,3'-indoline]-2-carboxylate 6c**

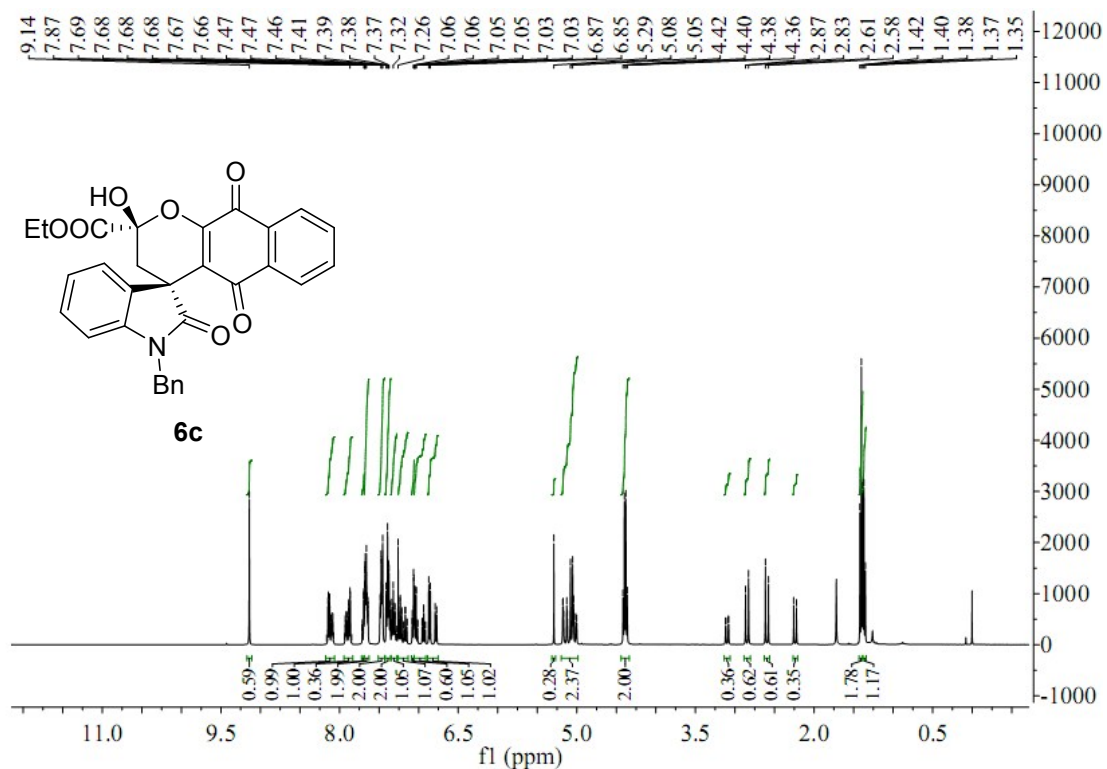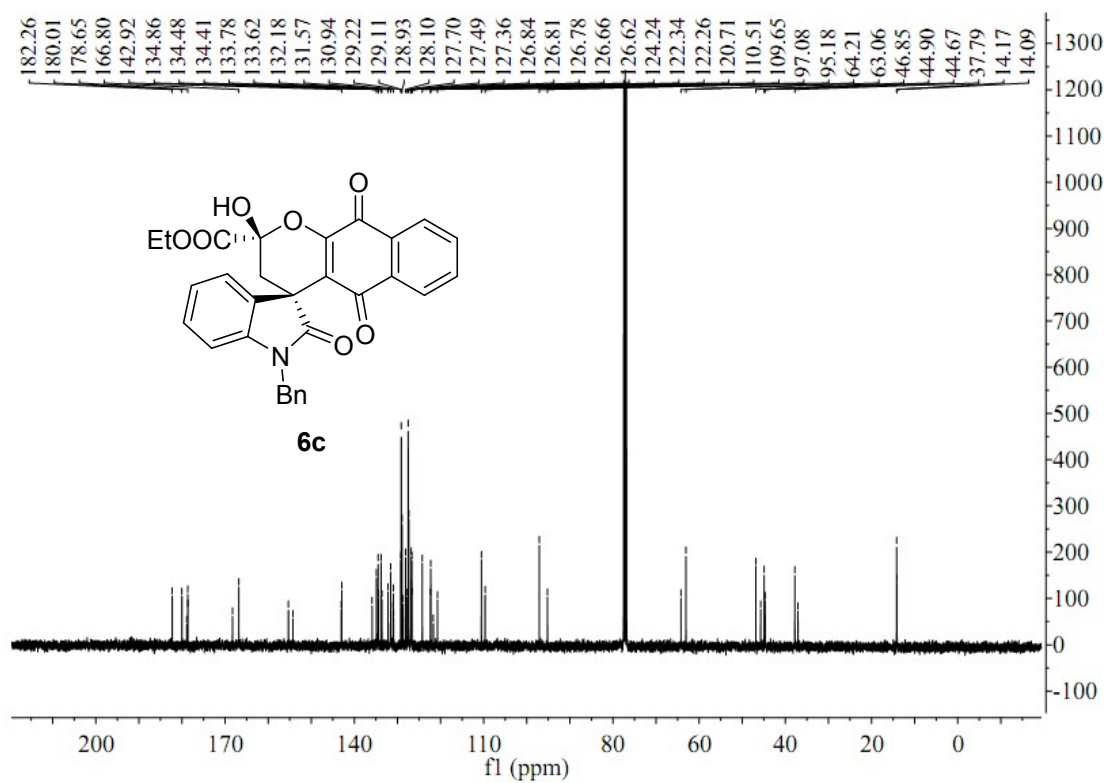

**Ethyl-1'-allyl-2-hydroxy-2',5,10-trioxo-2,3,5,10-tetrahydrospiro[benzo[g]chromene-4,3'-indoline]-2-carboxylate 6d**

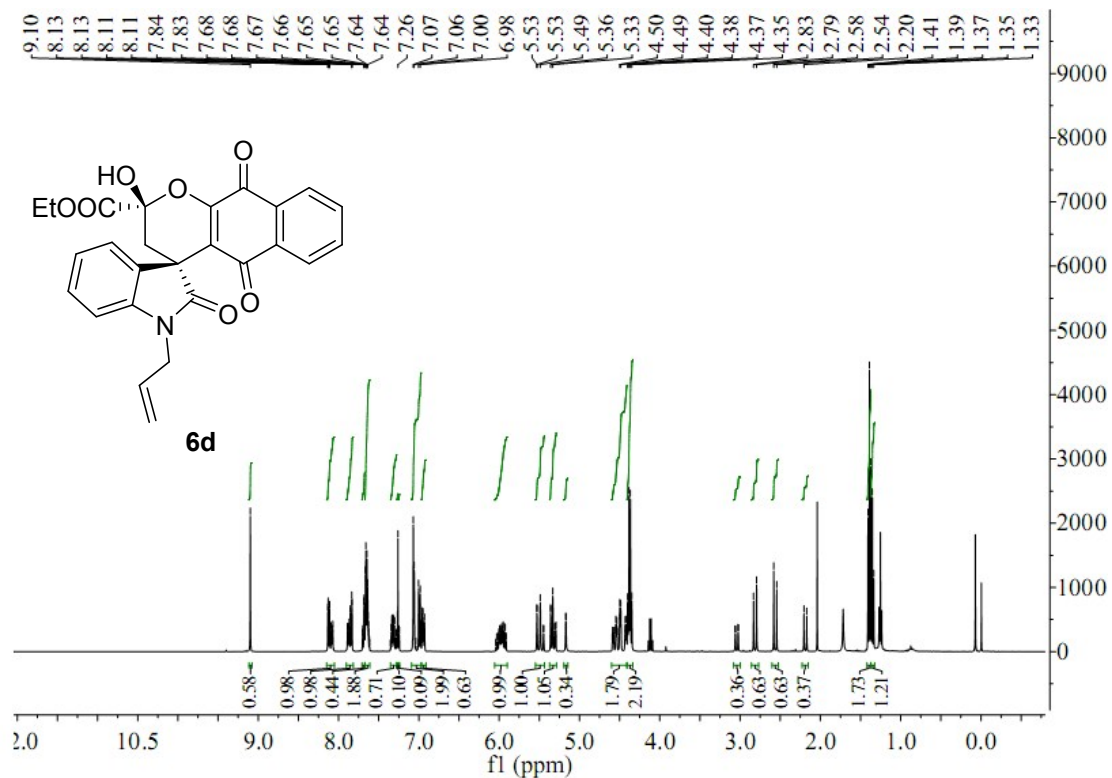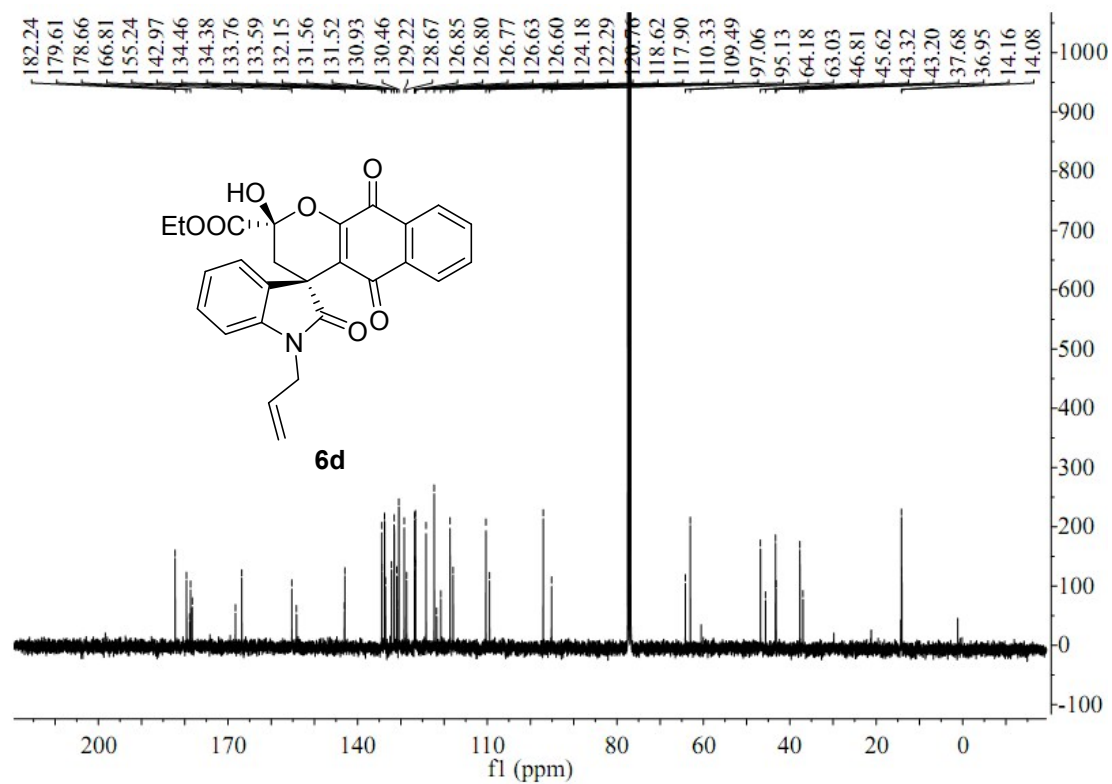

**1'-benzyl-2-ethyl-2-hydroxy-2',5,10-trioxo-2,3,5,10-tetrahydrospiro[benzo[g]chromene-4,3'-indoline]-1',2-dicarboxylate 6e**

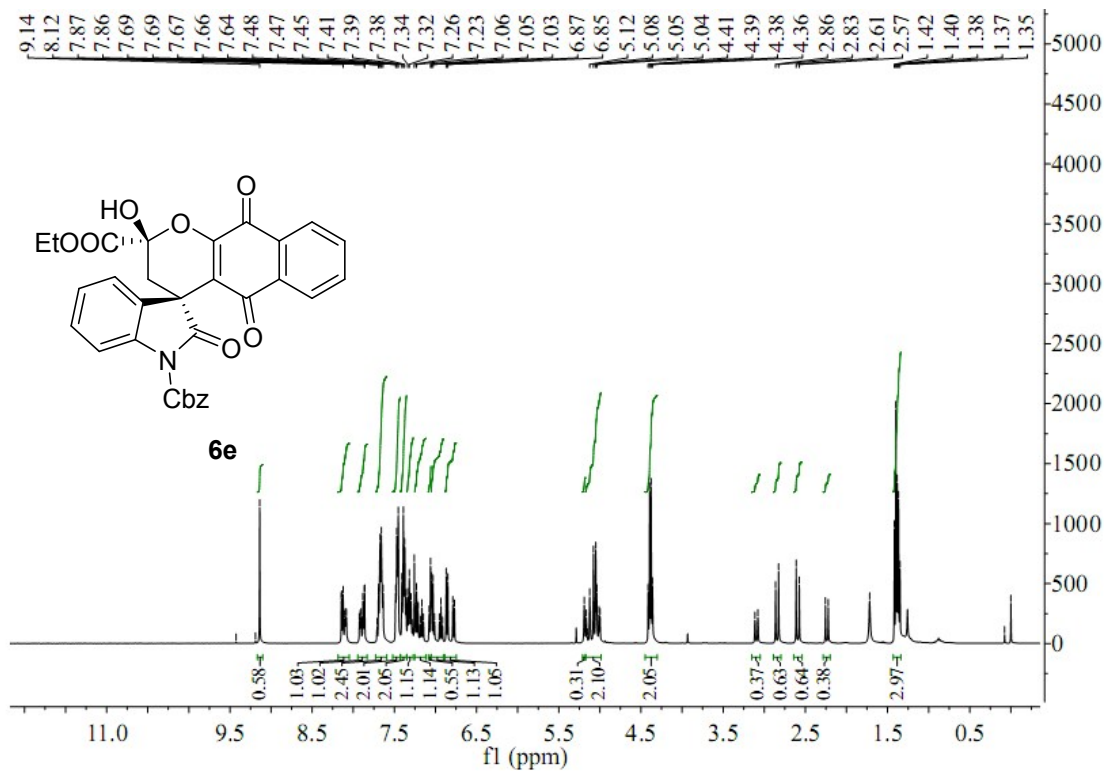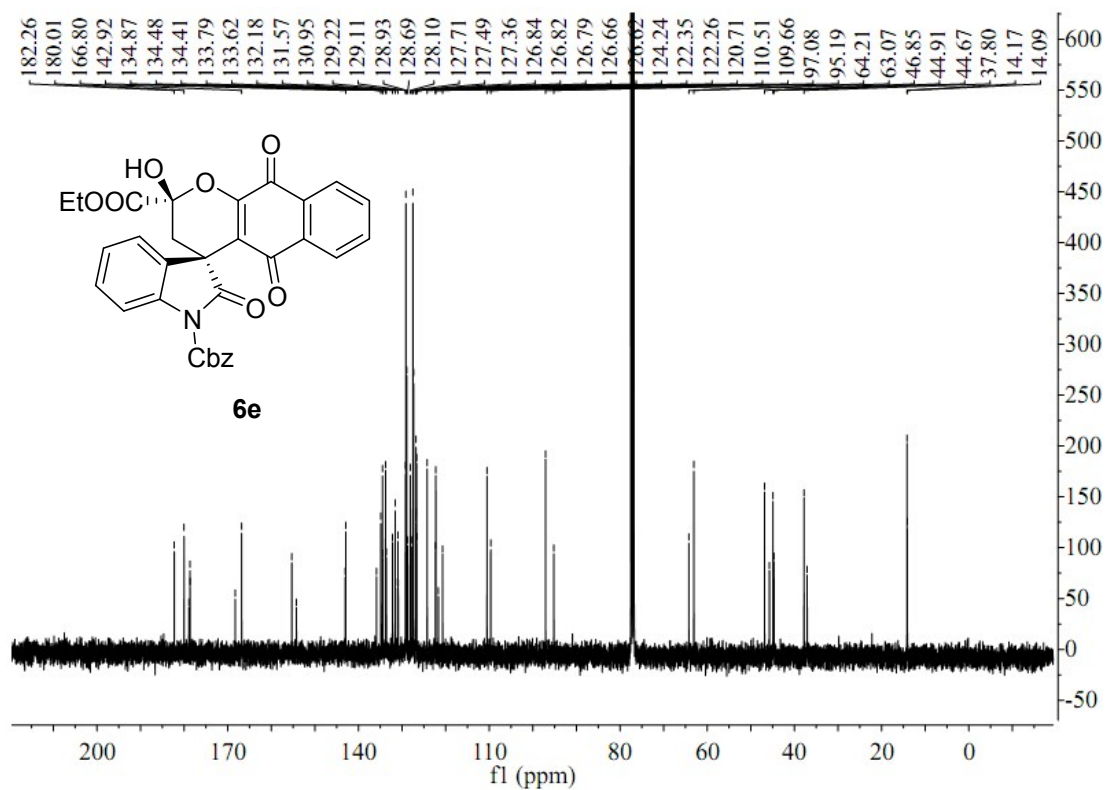



**Ethyl-1'-acetyl-2-hydroxy-2',5,10-trioxo-2,3,5,10-tetrahydrospiro[benzo[g]chromene-4,3'-indoline]-2-carboxylate 6f**

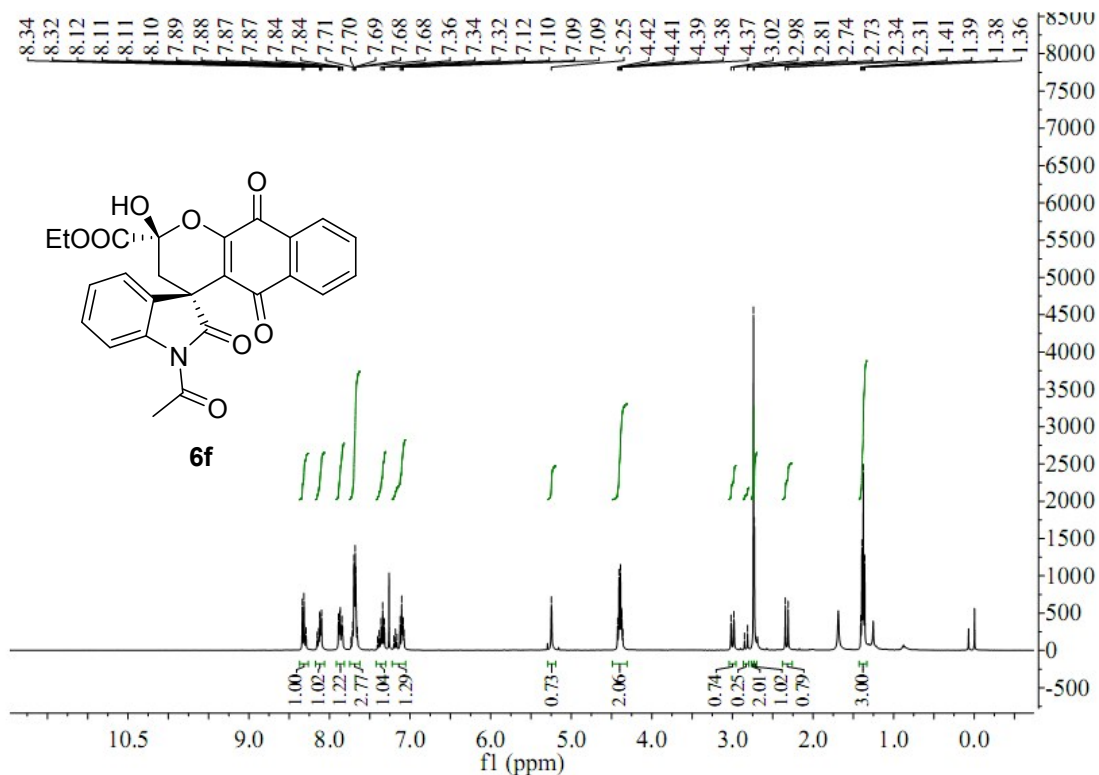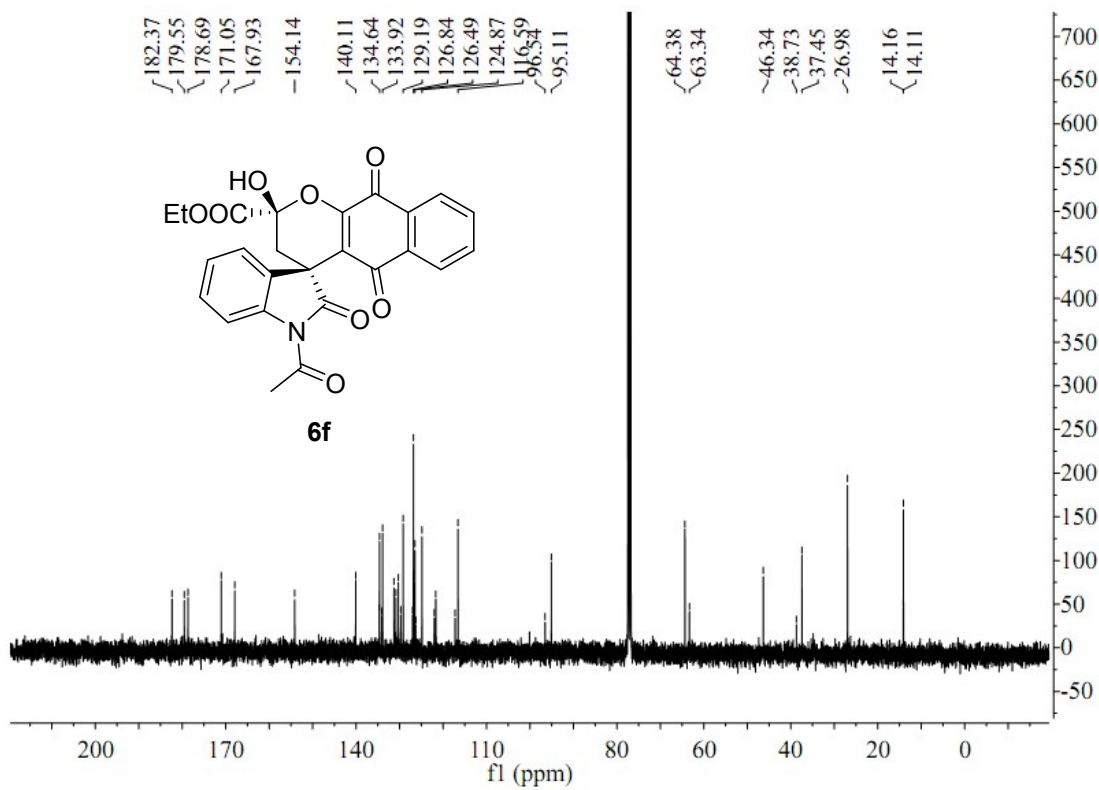

**Ethyl-5'-fluoro-2-hydroxy-1'-methyl-2',5,10-trioxo-2,3,5,10-tetrahydrospiro[benzo[g]chromene-4,3'-indoline]-2-carboxylate 6g**

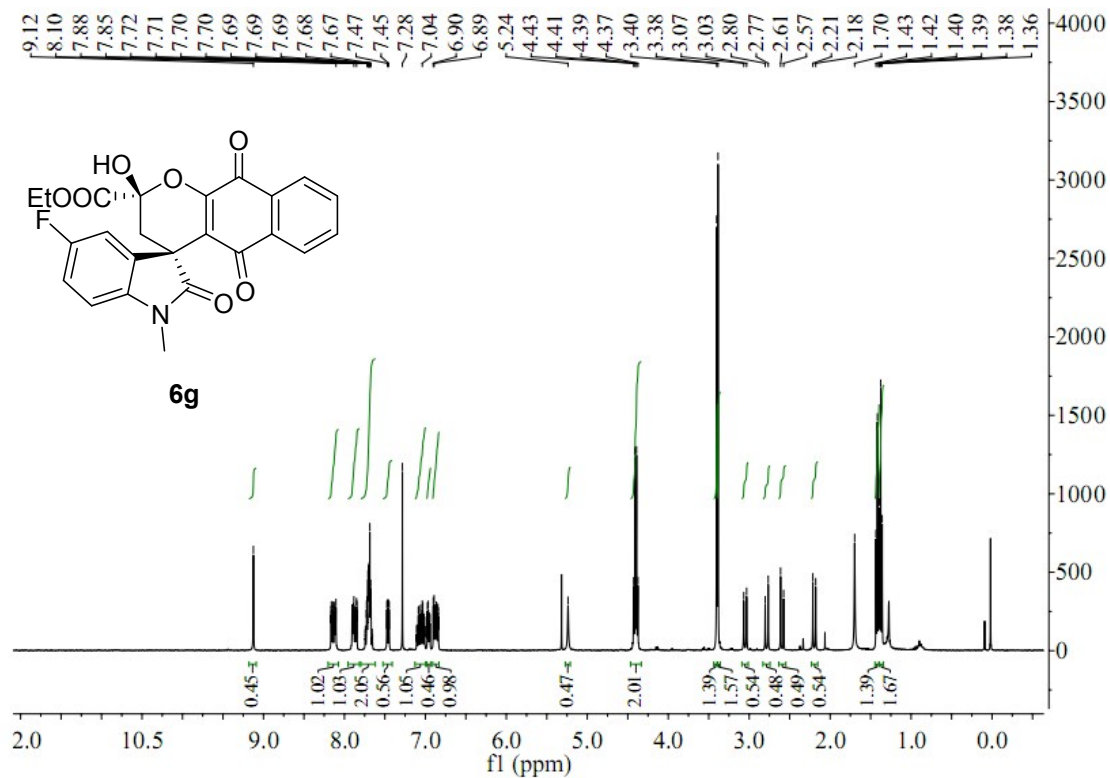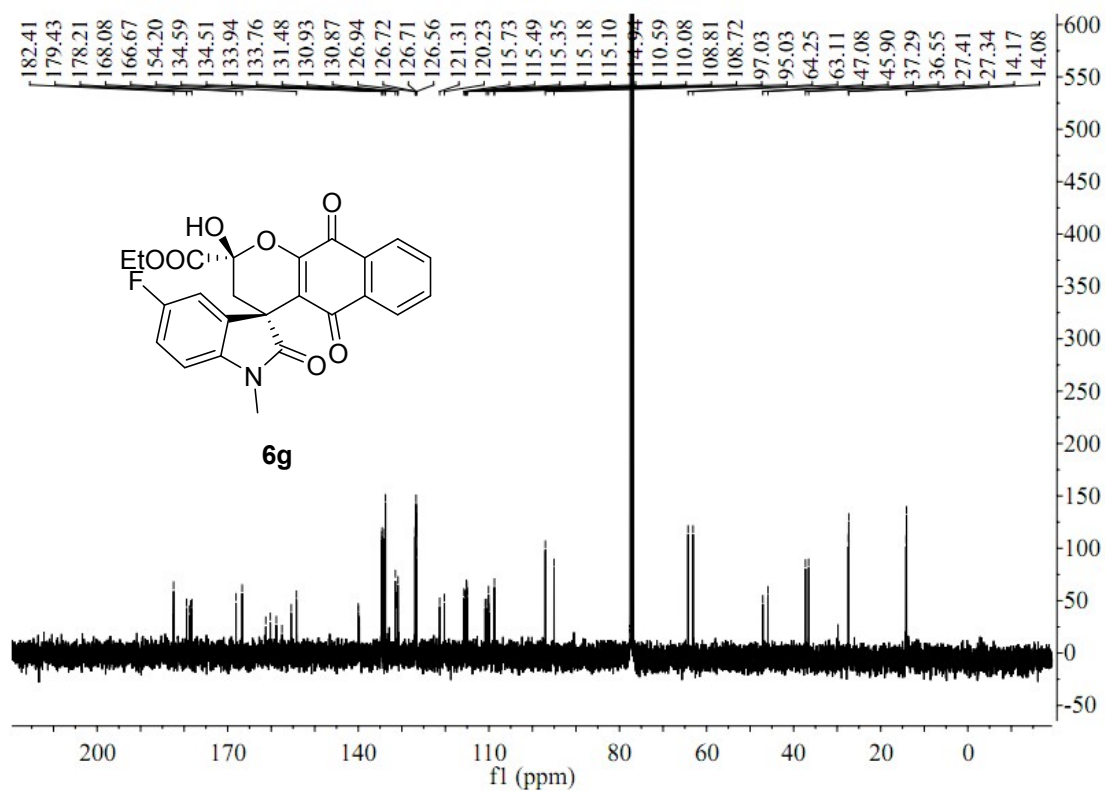

**Ethyl-5'-chloro-2-hydroxy-1'-methyl-2',5,10-trioxo-2,3,5,10-tetrahydrospiro[benzo[g]chromene-4,3'-indoline]-2-carboxylate 6h**

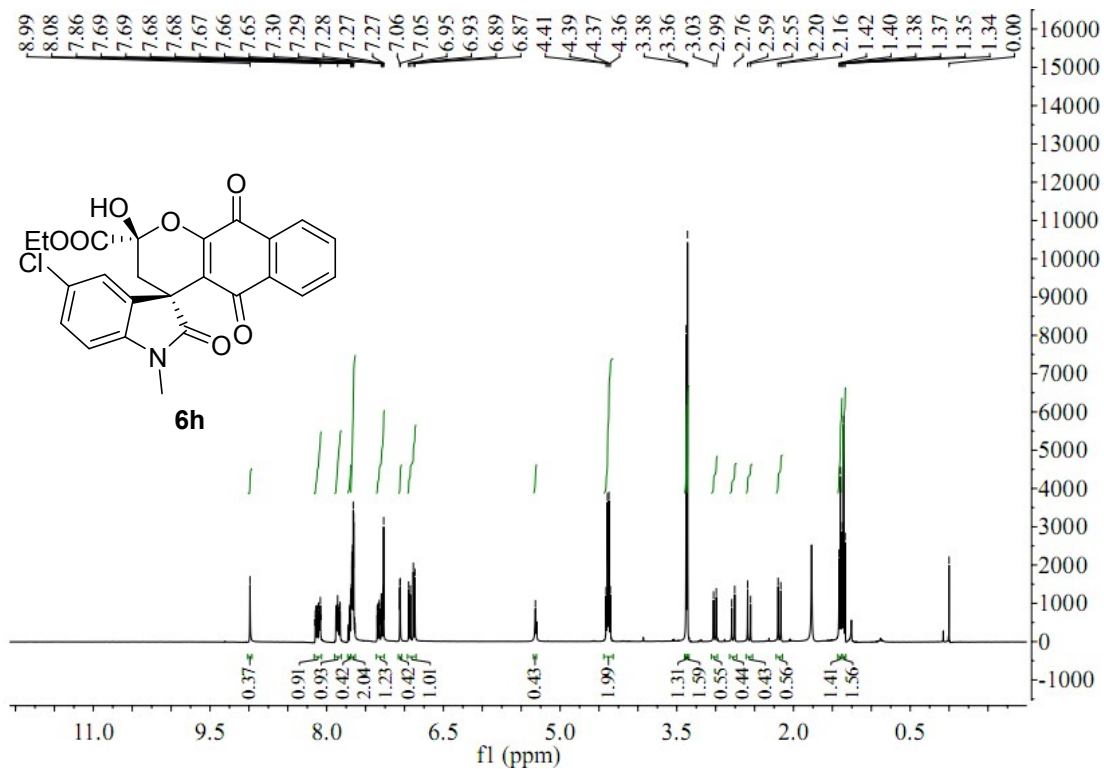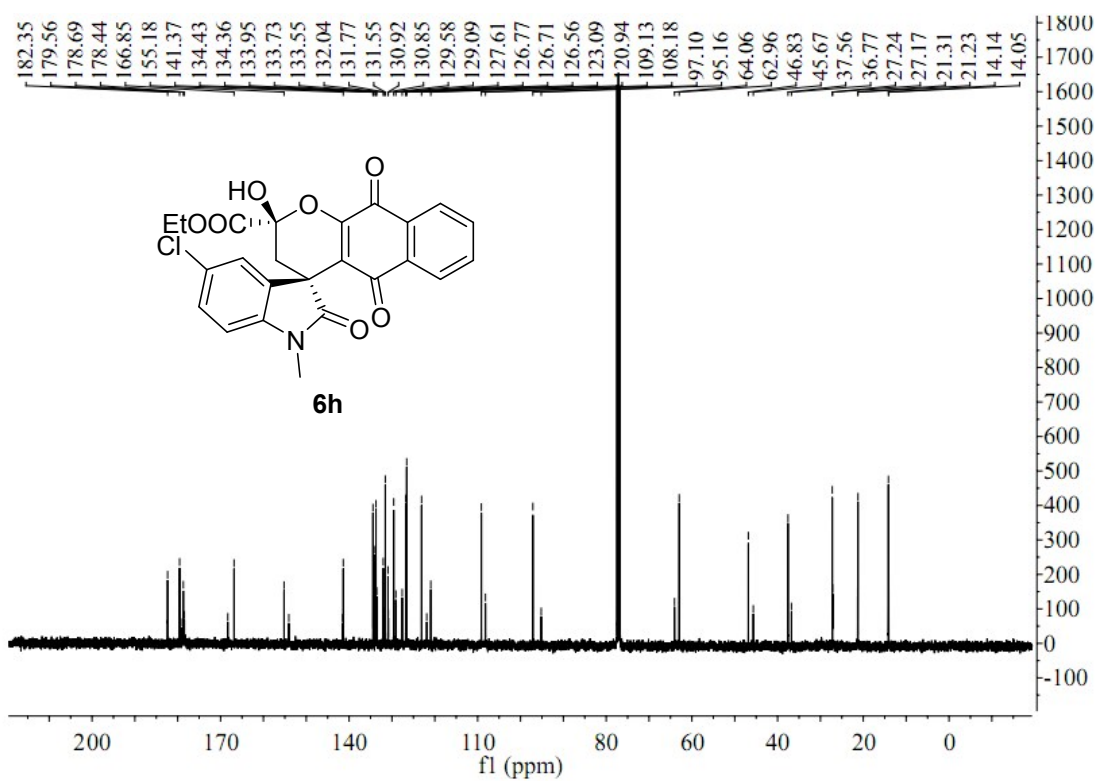

**Ethyl-5'-bromo-2-hydroxy-1'-methyl-2',5,10-trioxo-2,3,5,10-tetrahydrospiro[benzo[g]chromene-4,3'-indoline]-2-carboxylate **6i****

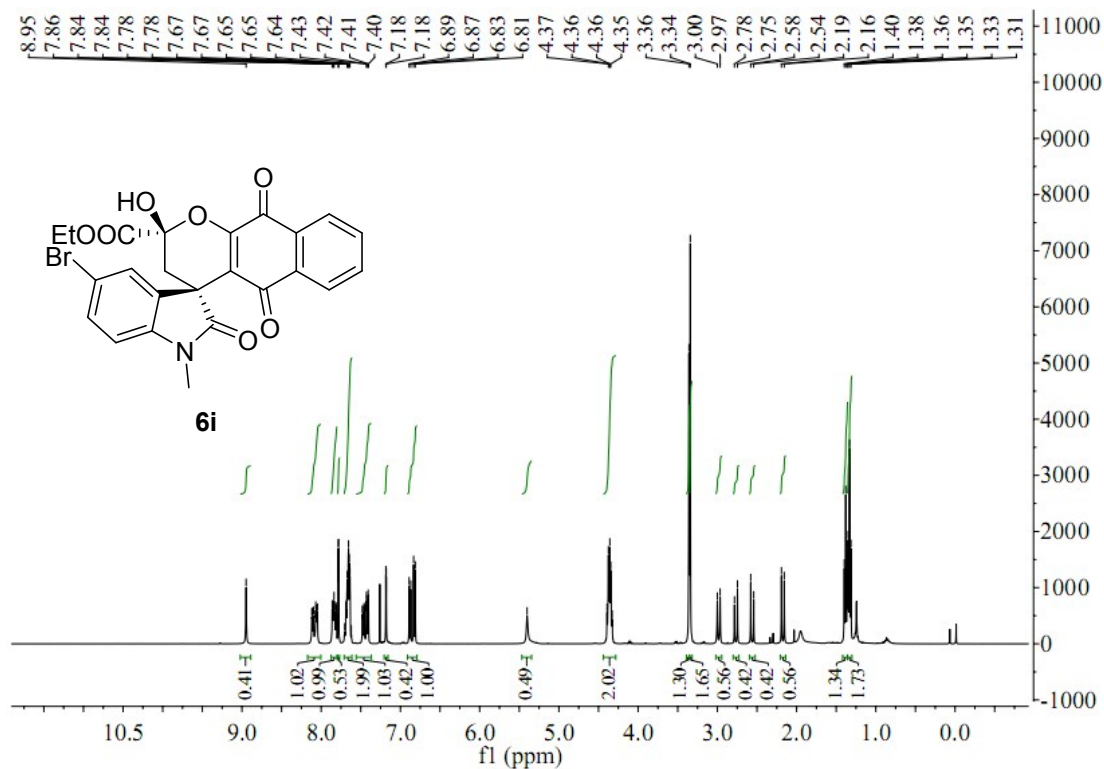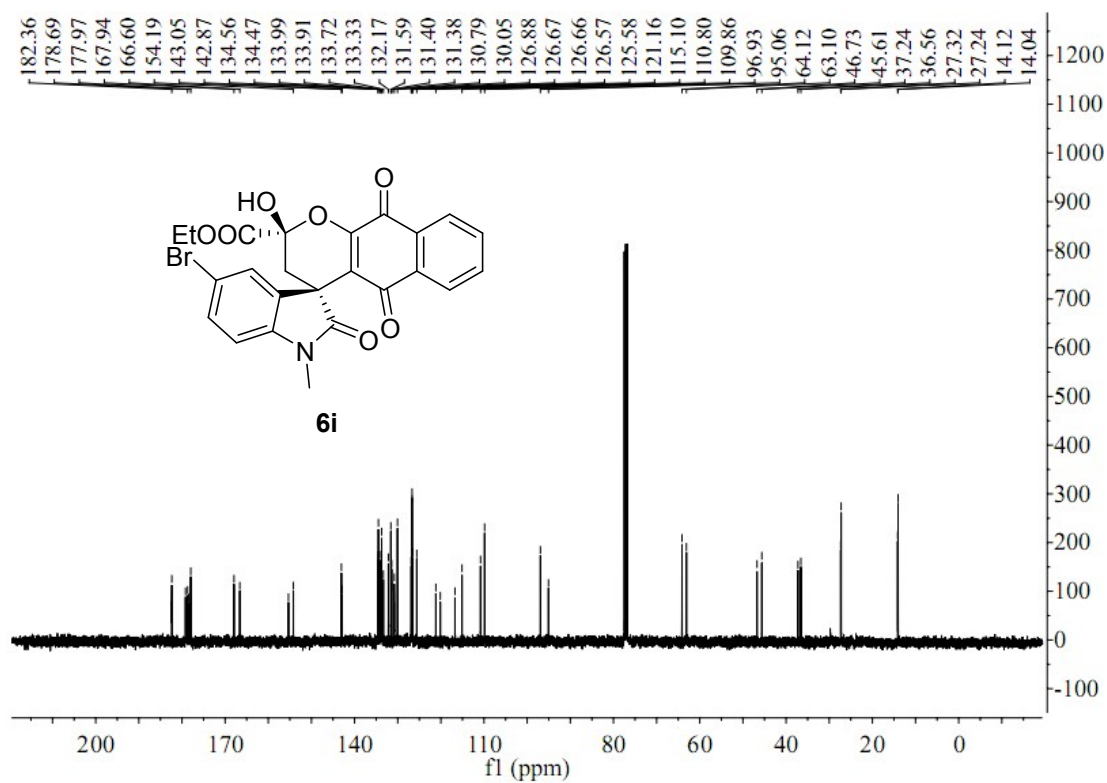

**Ethyl-2-hydroxy-1',5'-dimethyl-2',5,10-trioxo-2,3,5,10-tetrahydrospiro[benzo[g]chromene-4,3'-indoline]-2-carboxylate 6j**

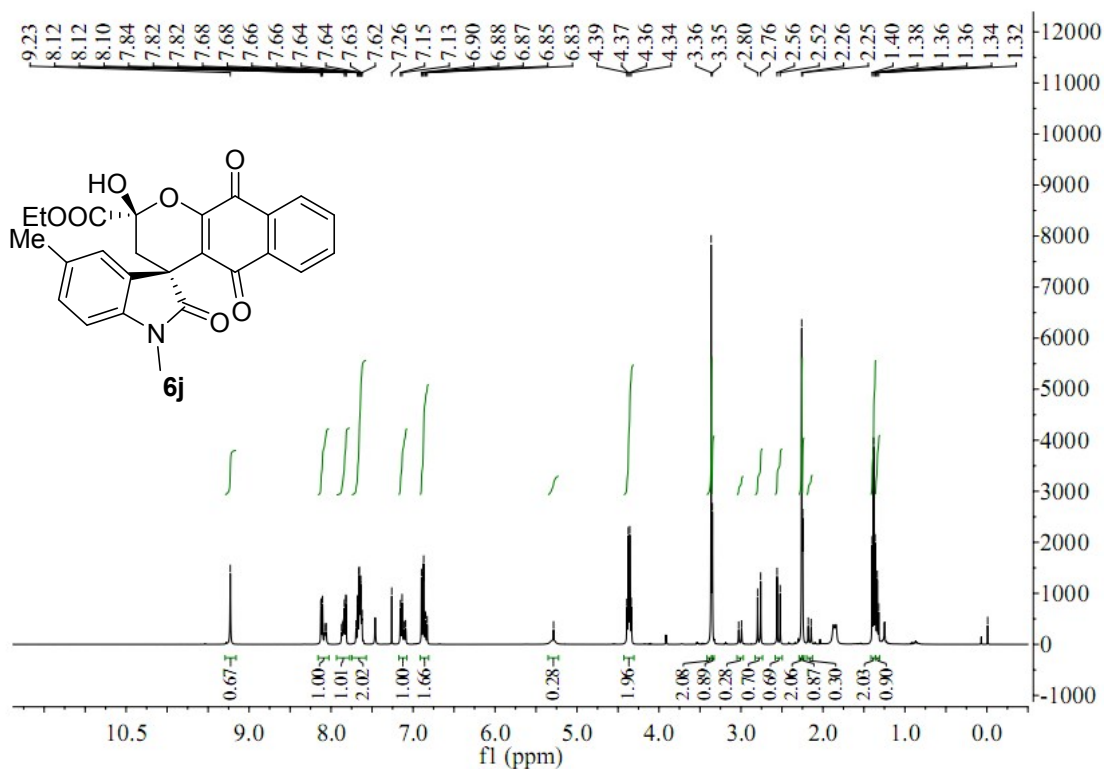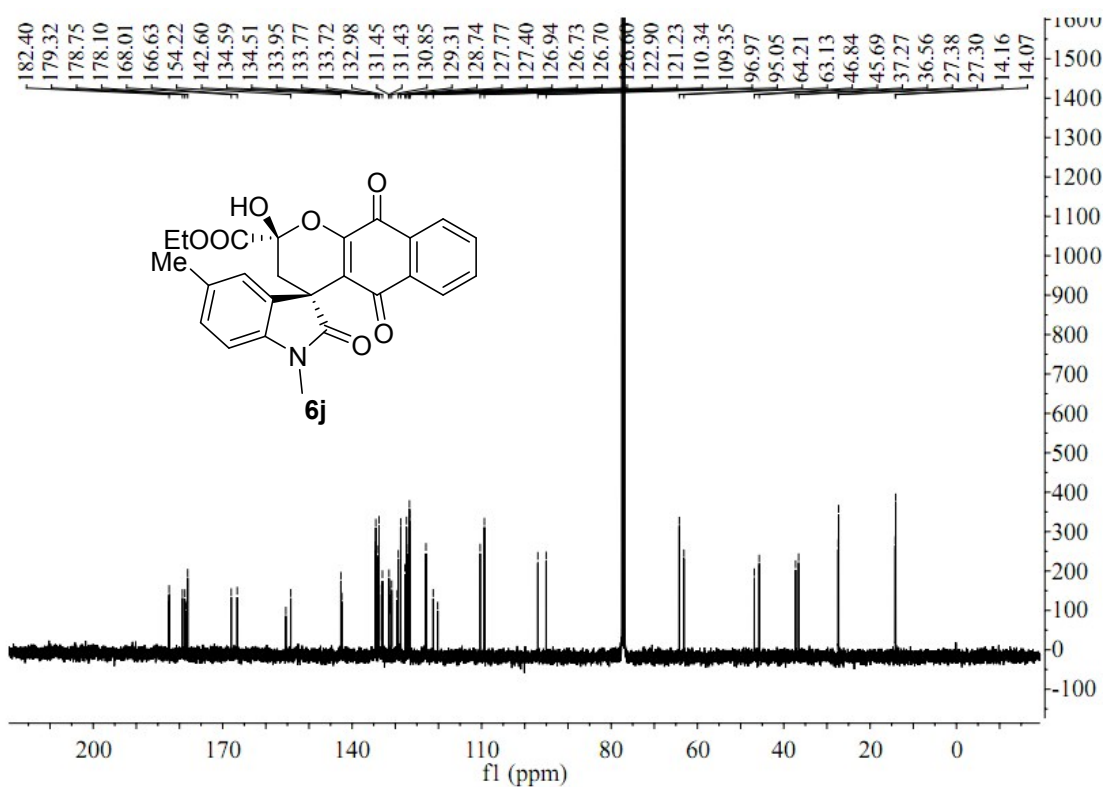

**Ethyl-2-hydroxy-5'-methoxy-1'-methyl-2',5,10-trioxo-2,3,5,10-tetrahydrospiro[benzo[g]chromene-4,3'-indoline]-2-carboxylate 6k**

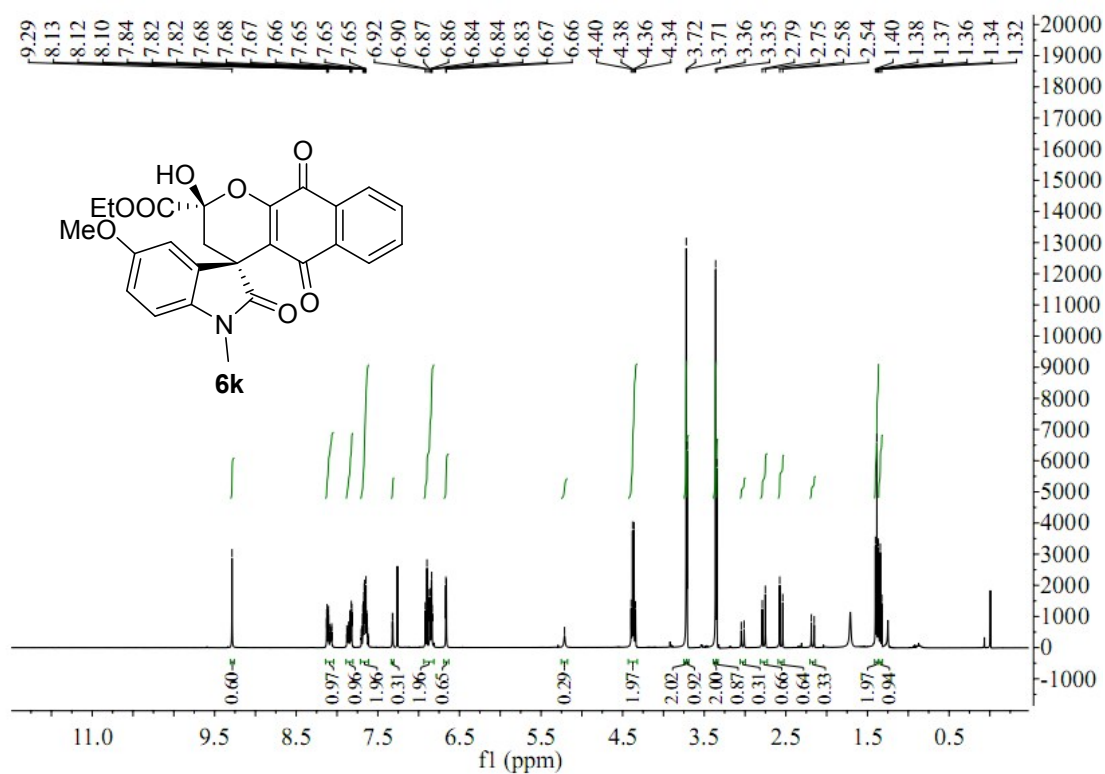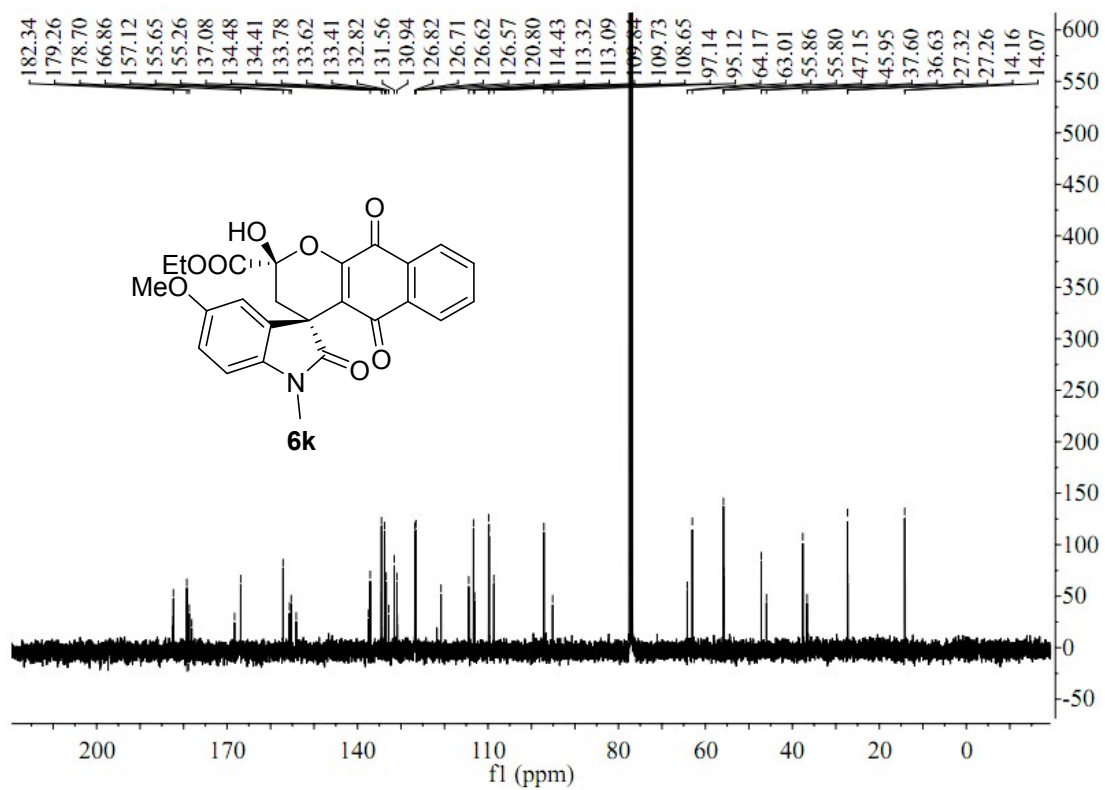

**Ethyl-6'-chloro-2-hydroxy-1'-methyl-2',5,10-trioxo-2,3,5,10-tetrahydrospiro[benzo[g]chromene-4,3'-indoline]-2-carboxylate 6l**

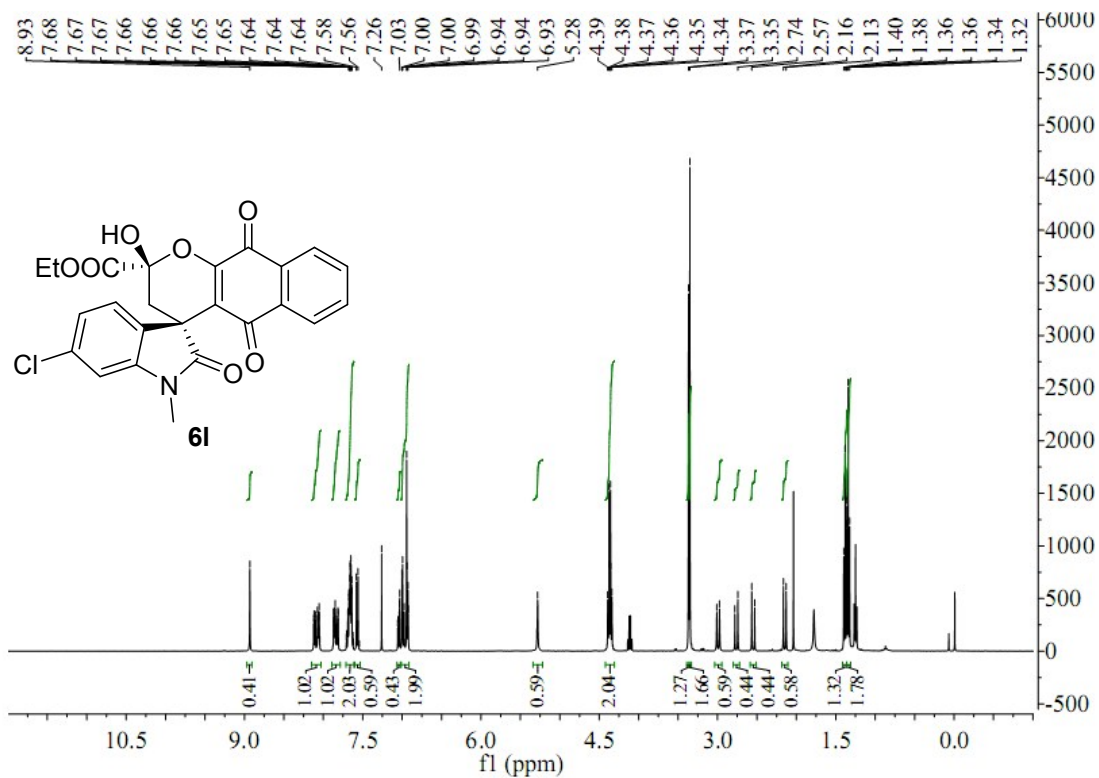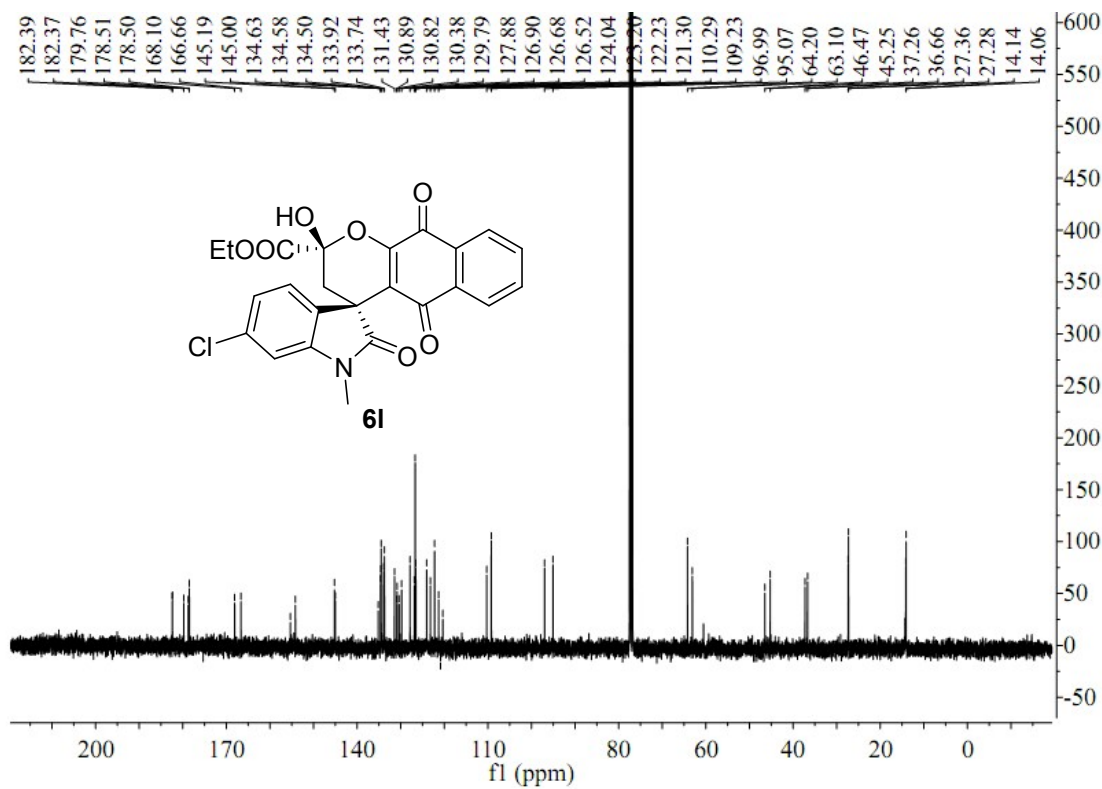

**Ethyl-6'-bromo-2-hydroxy-1'-methyl-2',5,10-trioxo-2,3,5,10-tetrahydrospiro[benzo[g]chromene-4,3'-indoline]-2-carboxylate 6m**

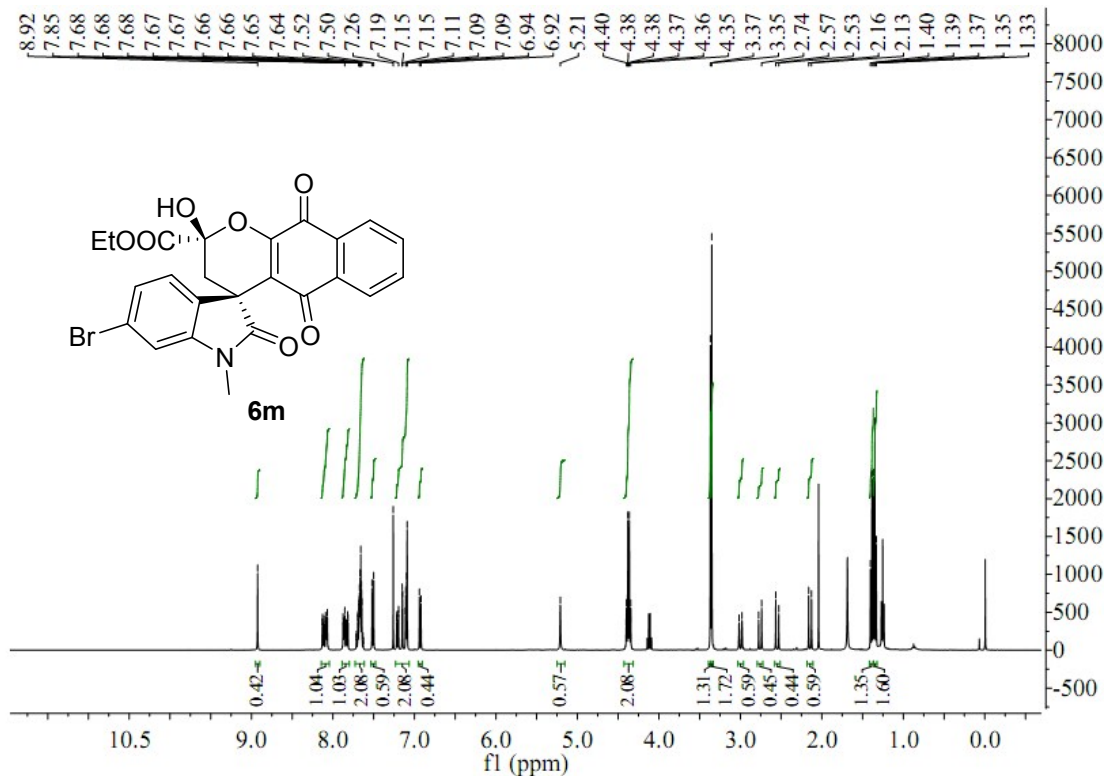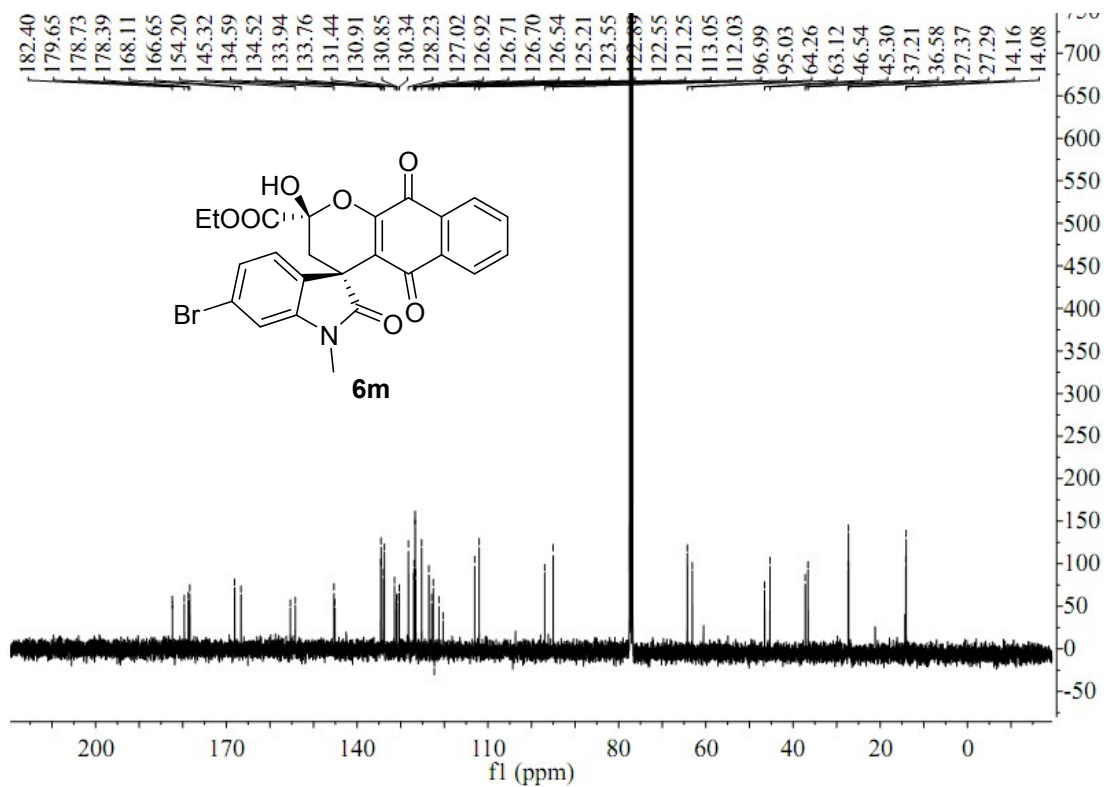



**Ethyl-2-hydroxy-6'-methoxy-1'-methyl-2',5,10-trioxo-2,3,5,10-tetrahydrospiro[benzo[g]chromene-4,3'-indoline]-2-carboxylate 6n**

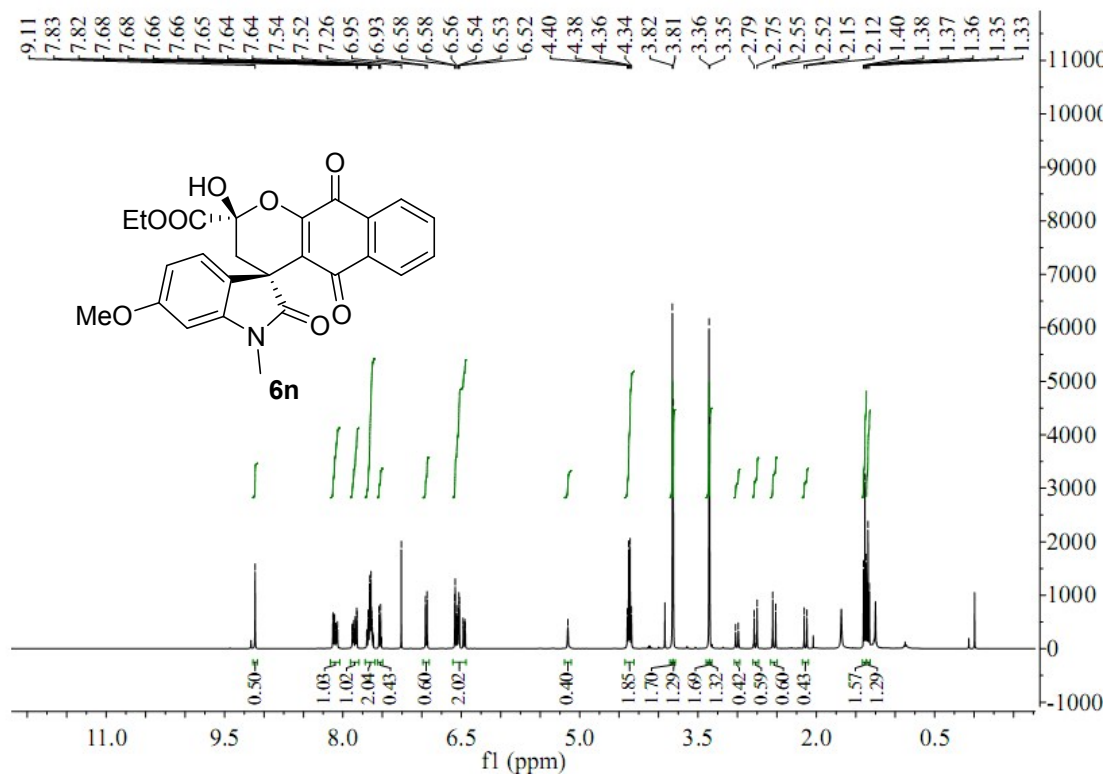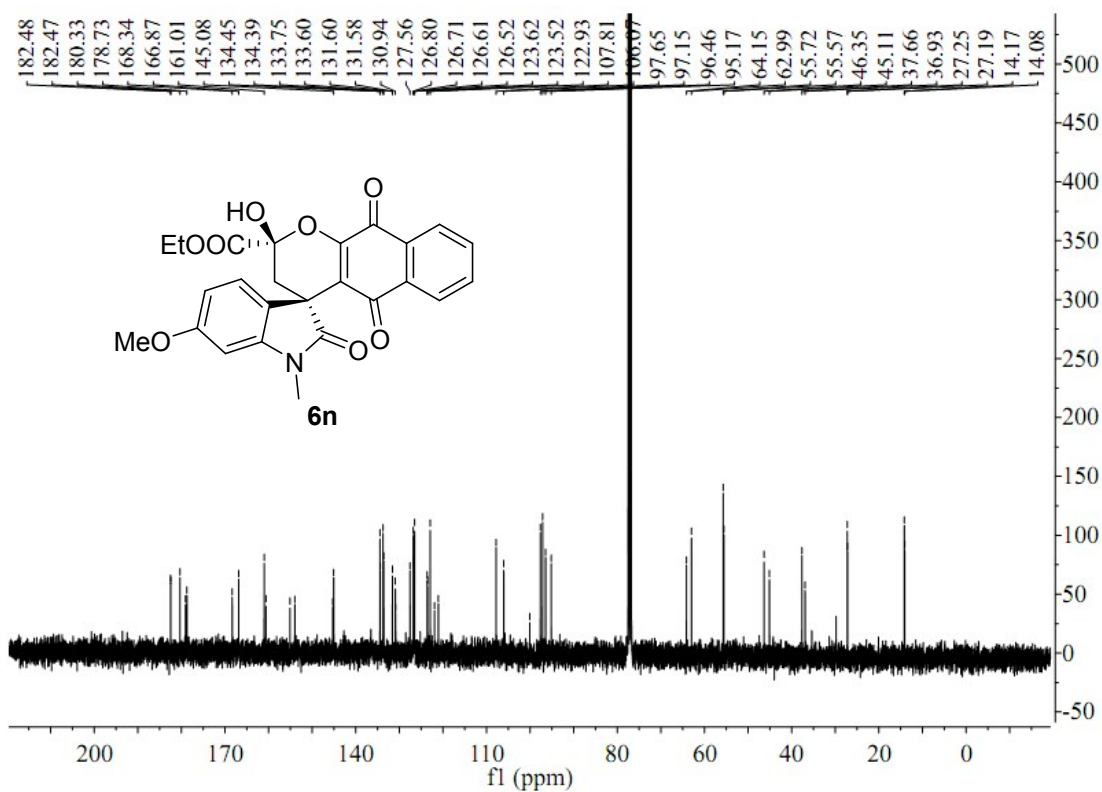

**Ethyl-7'-fluoro-2-hydroxy-1'-methyl-2',5,10-trioxo-2,3,5,10-tetrahydrospiro[benzo[g]chromene-4,3'-indoline]-2-carboxylate 6o**

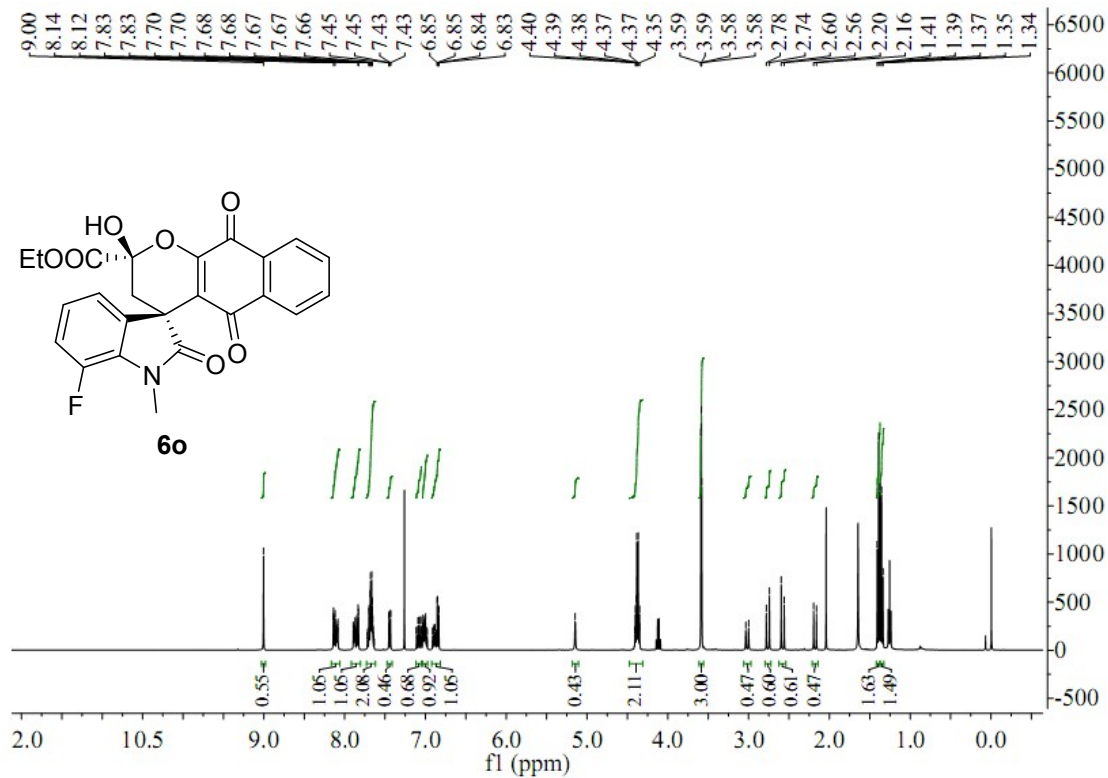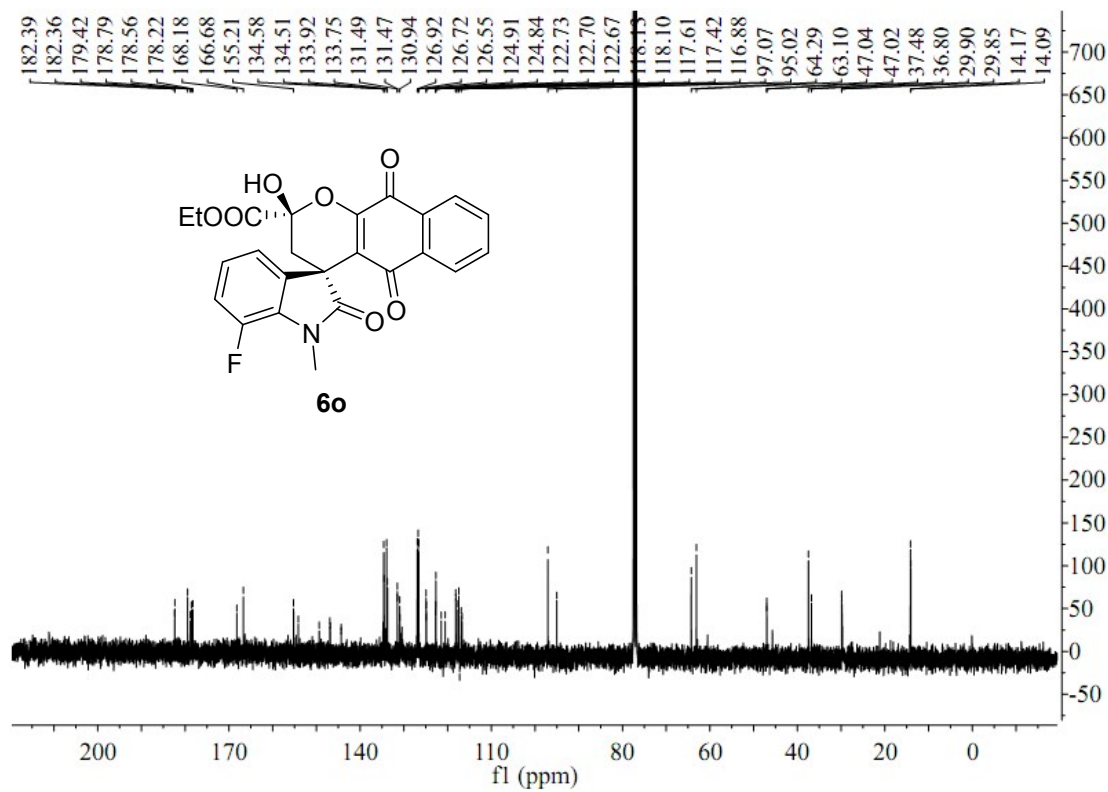

**Ethyl-2-hydroxy-1',7'-dimethyl-2',5,10-trioxo-2,3,5,10-tetrahydrospiro[benzo[g]chromene-4,3'-indoline]-2-carboxylate 6p**

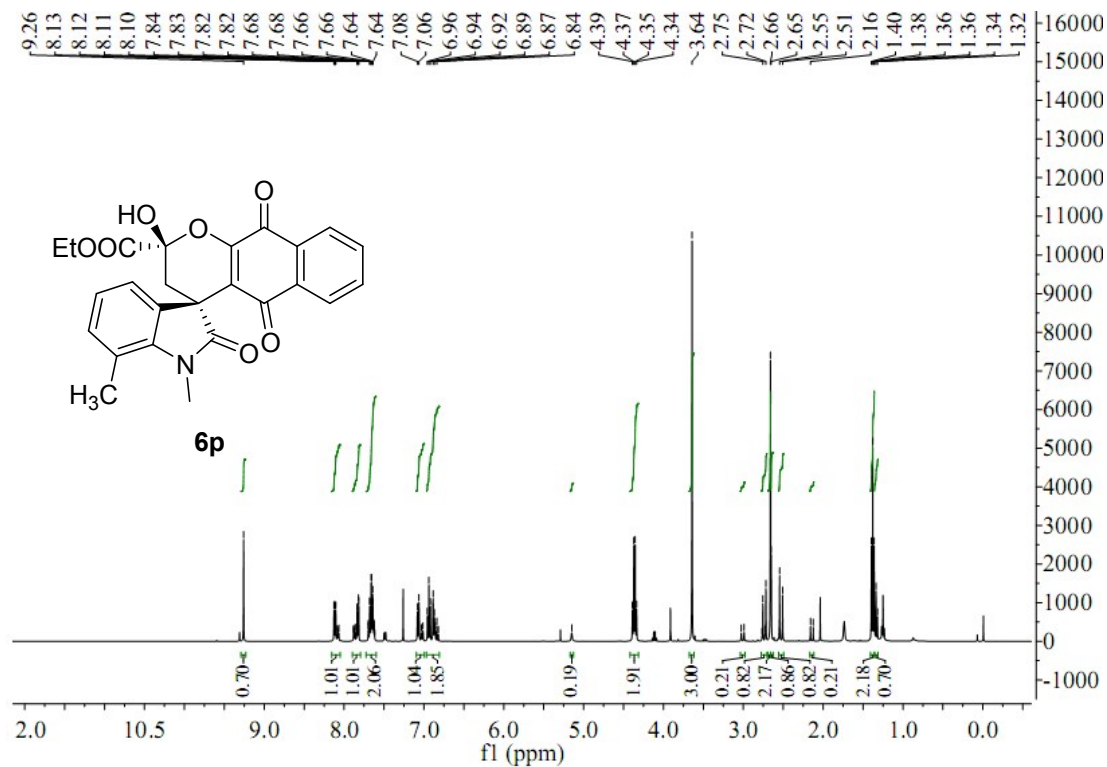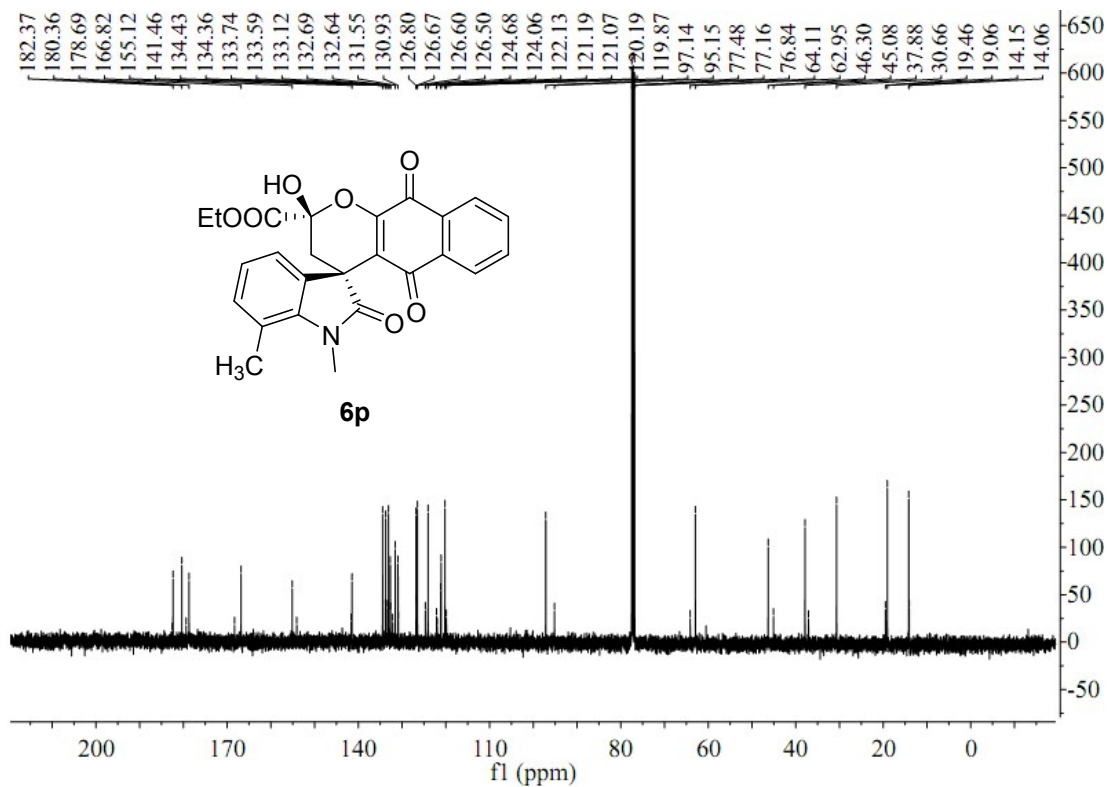

**Ethyl-2-hydroxy-1',5',7'-trimethyl-2',5,10-trioxo-2,3,5,10-tetrahydrospiro[benzo[g]chromene-4,3'-indoline]-2-carboxylate 6q**

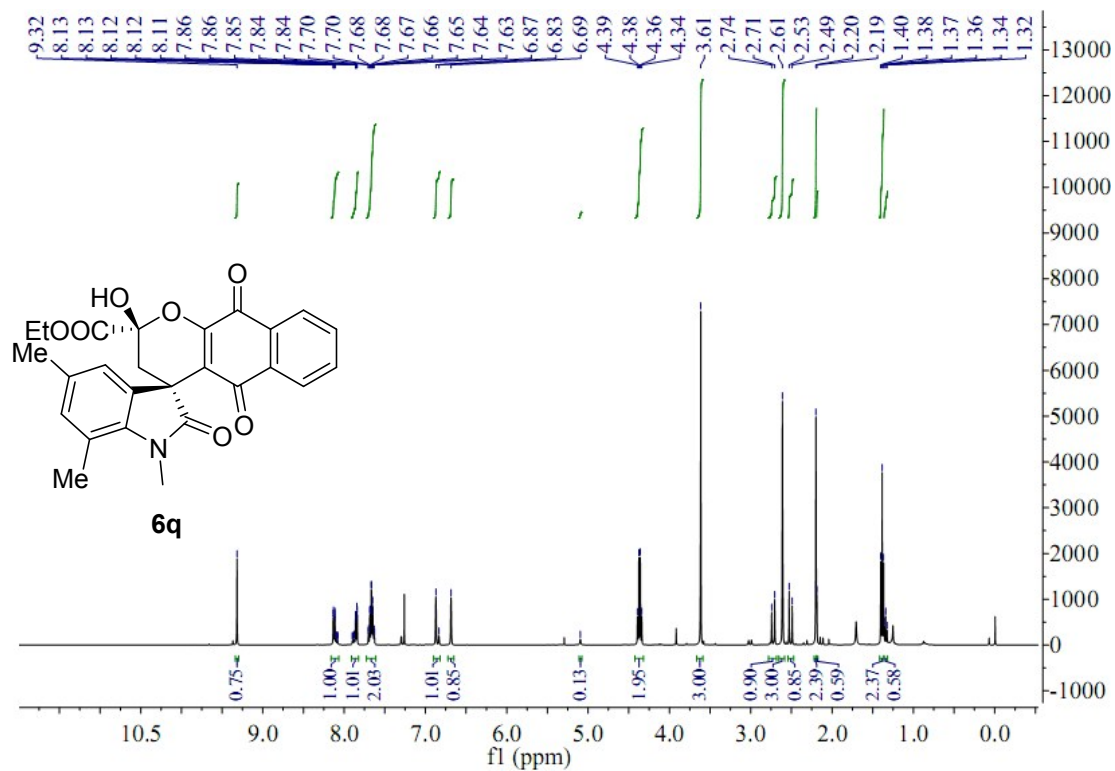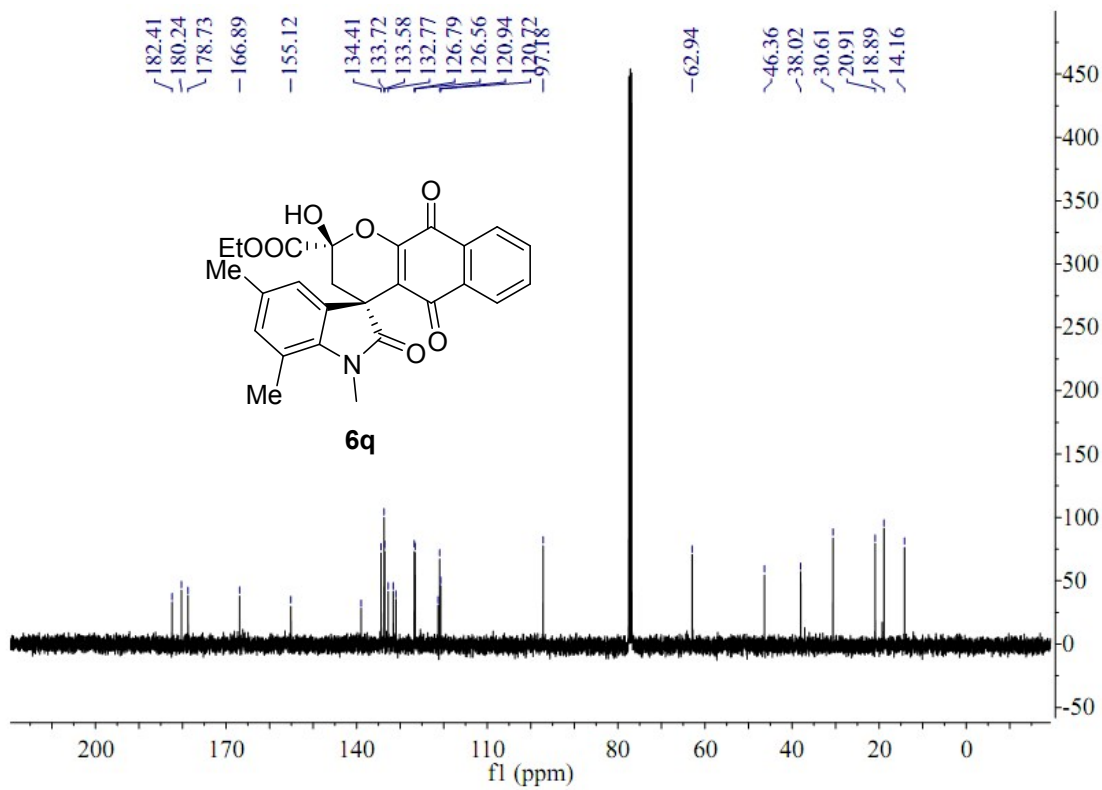

**Ethyl-5',6'-difluoro-2-hydroxy-1'-methyl-2',5,10-trioxo-2,3,5,10-tetrahydrospiro[benzo[g]chromene-4,3'-indoline]-2-carboxylate 6r**

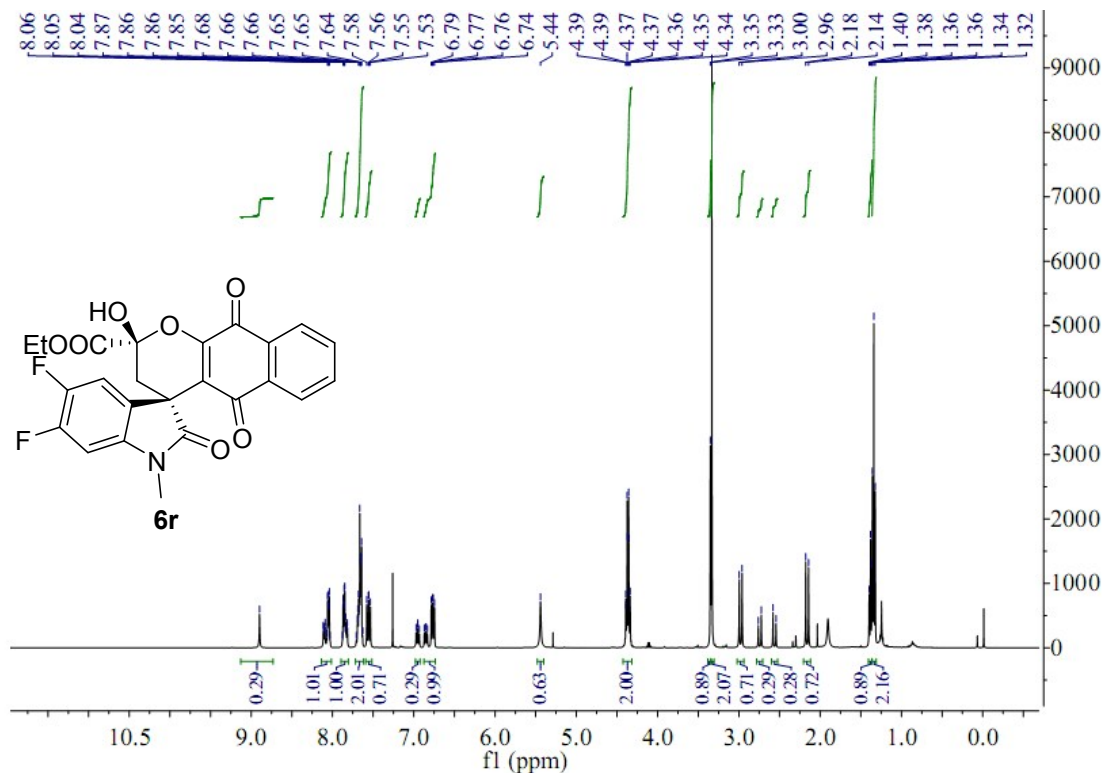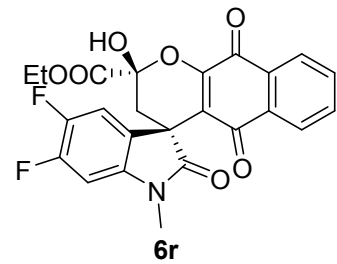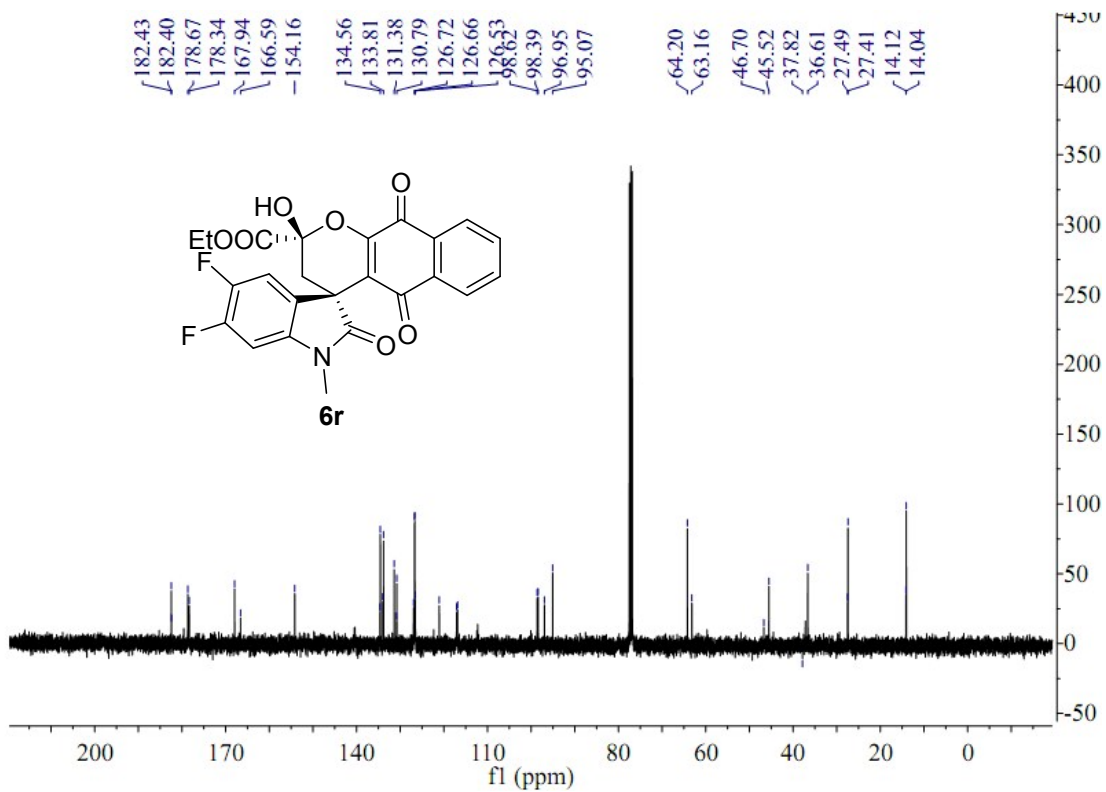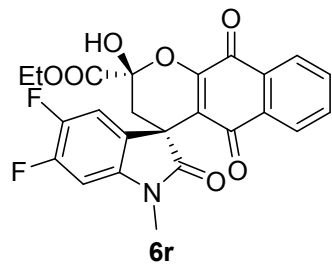

**Methyl-2-hydroxy-1'-methyl-2',5,10-trioxo-2,3,5,10-tetrahydrospiro[benzo[g]chromene-4,3'-indoline]-2-carboxylate 6s**

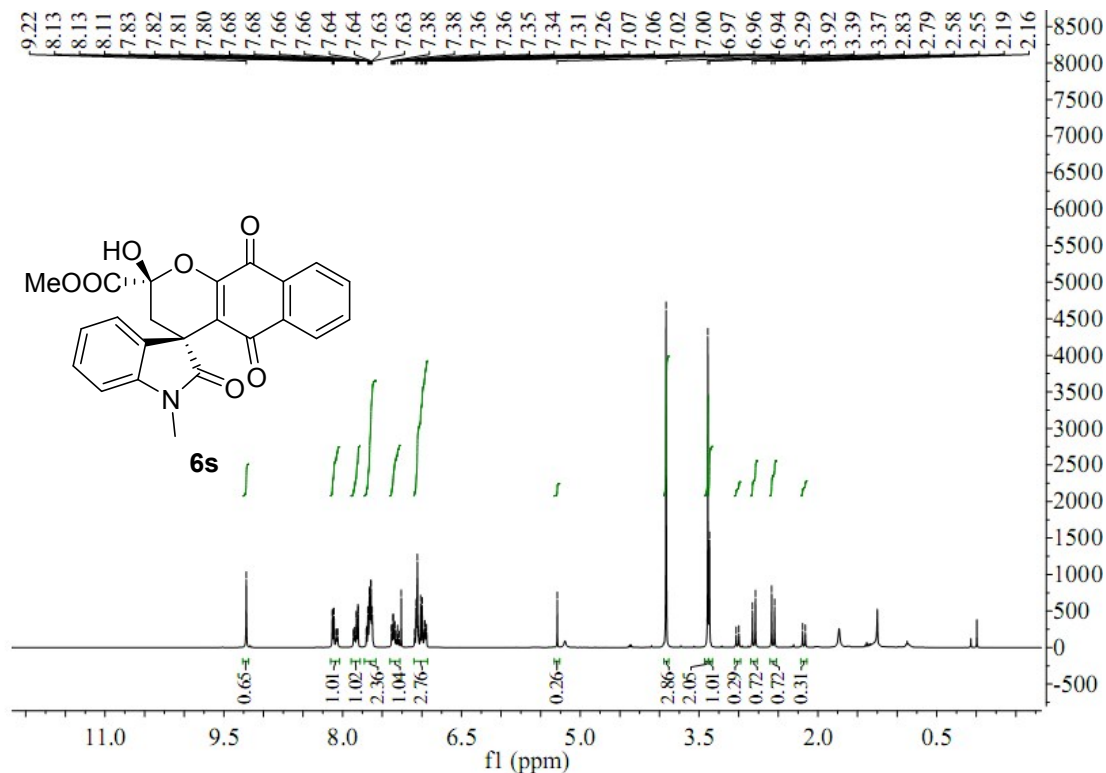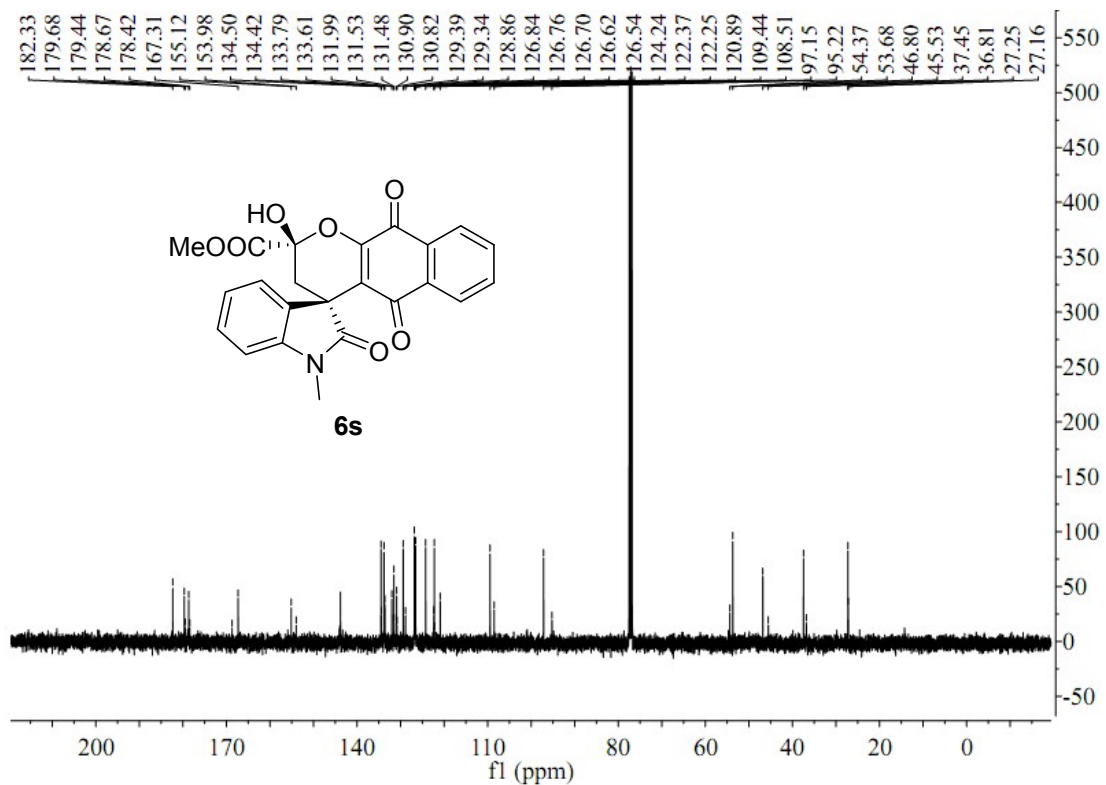

**Ethyl-2-hydroxy-1',7-dimethyl-2',5,10-trioxo-2,3,5,10-tetrahydrospiro[benzo[g]chromene-4,3'-indoline]-2-carboxylate 6t**

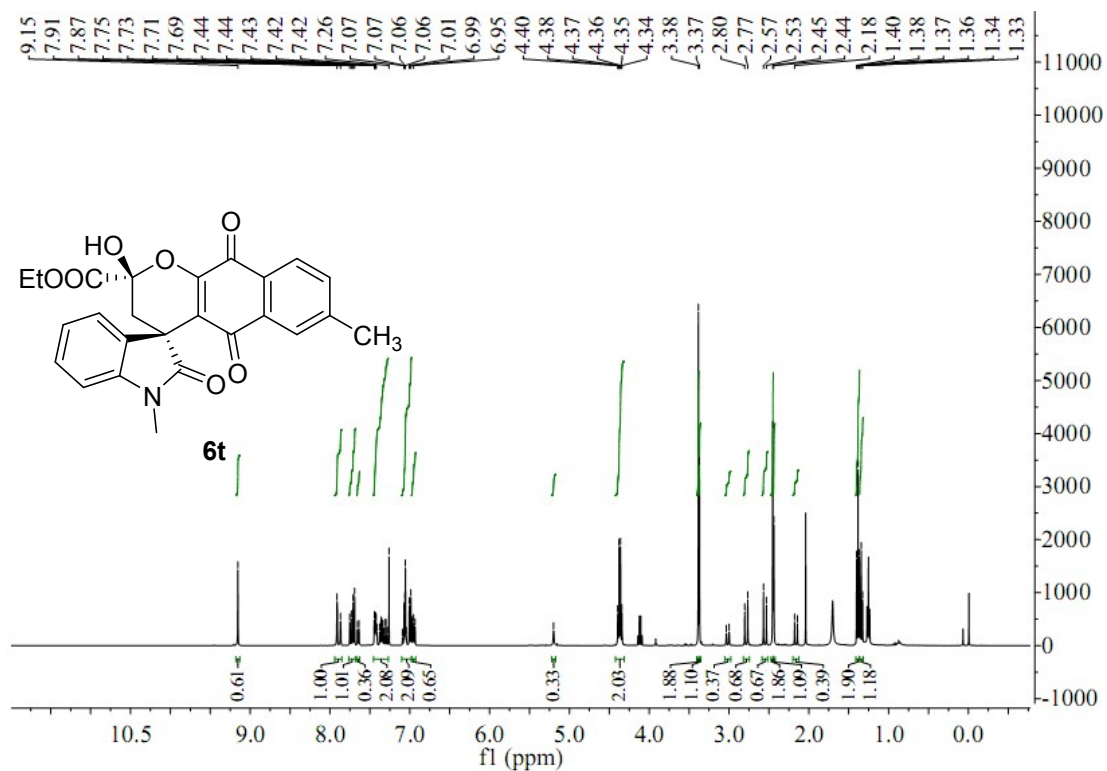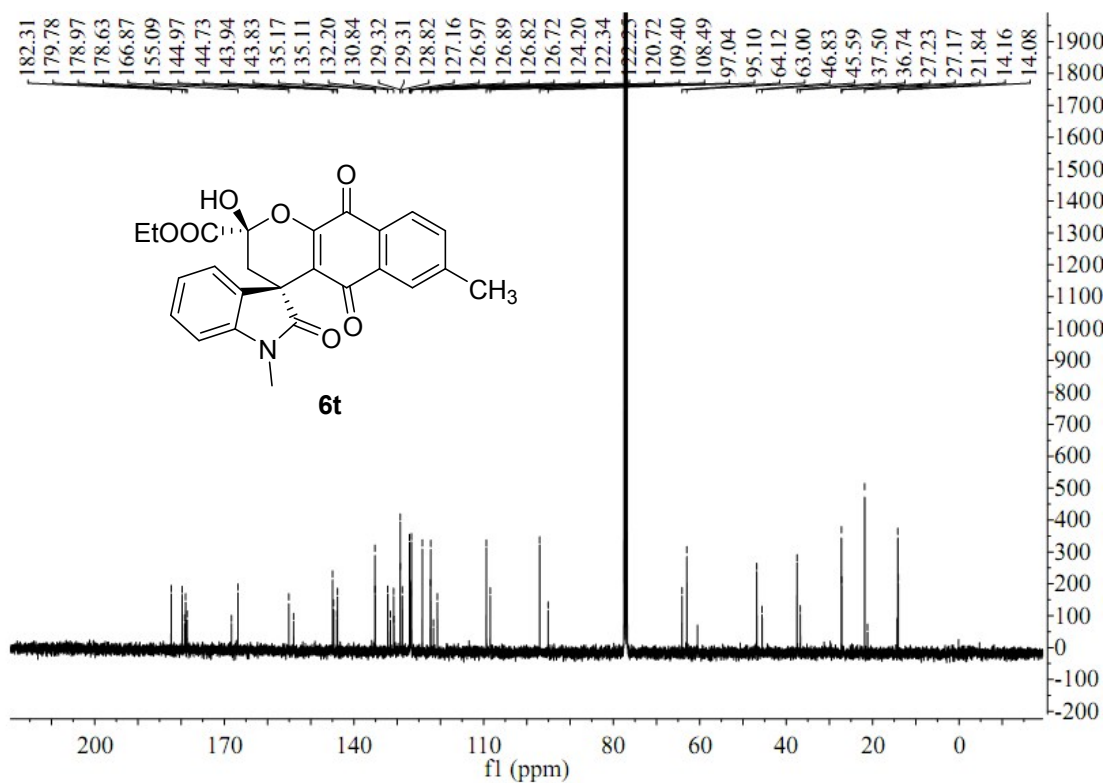

**Ethyl-1-methyl-2,10'-dioxo-2'-((trimethylsilyl)oxy)-2',3'-dihydro-10'H-spiro[indoline-3,4'-pyrano[3,2-b]chromene]-2'-carboxylate 7**

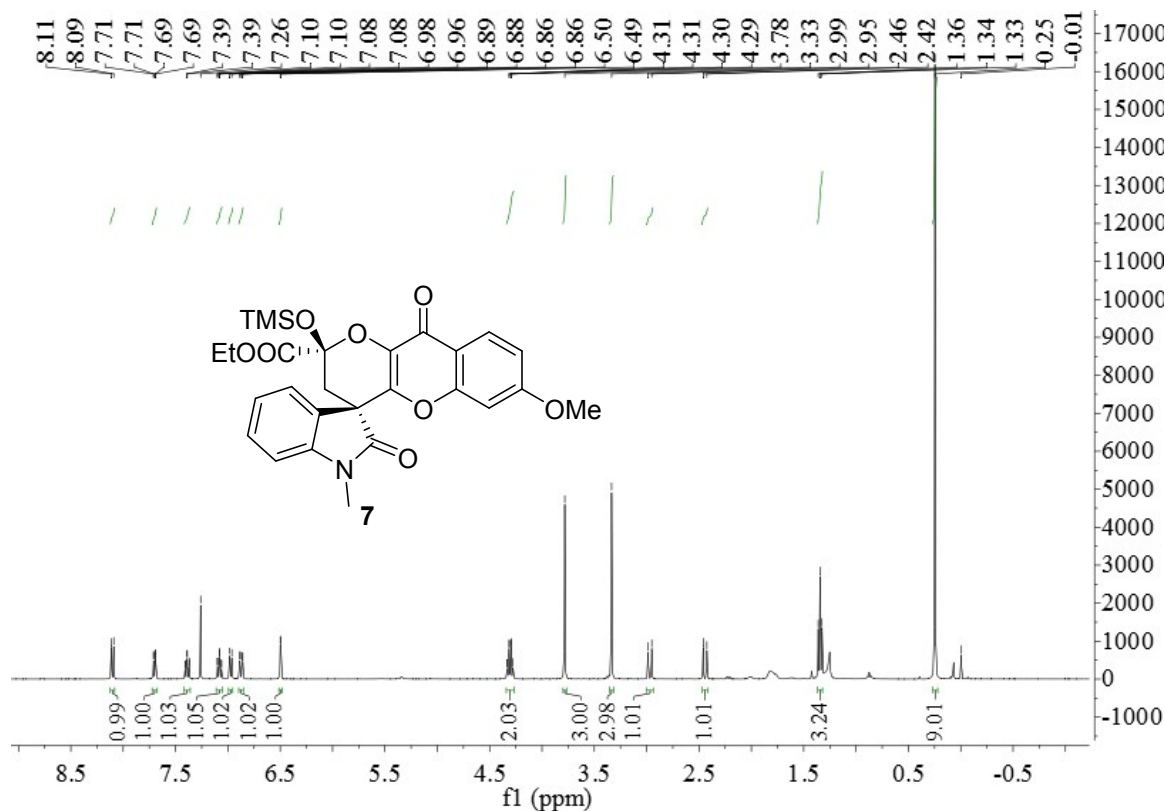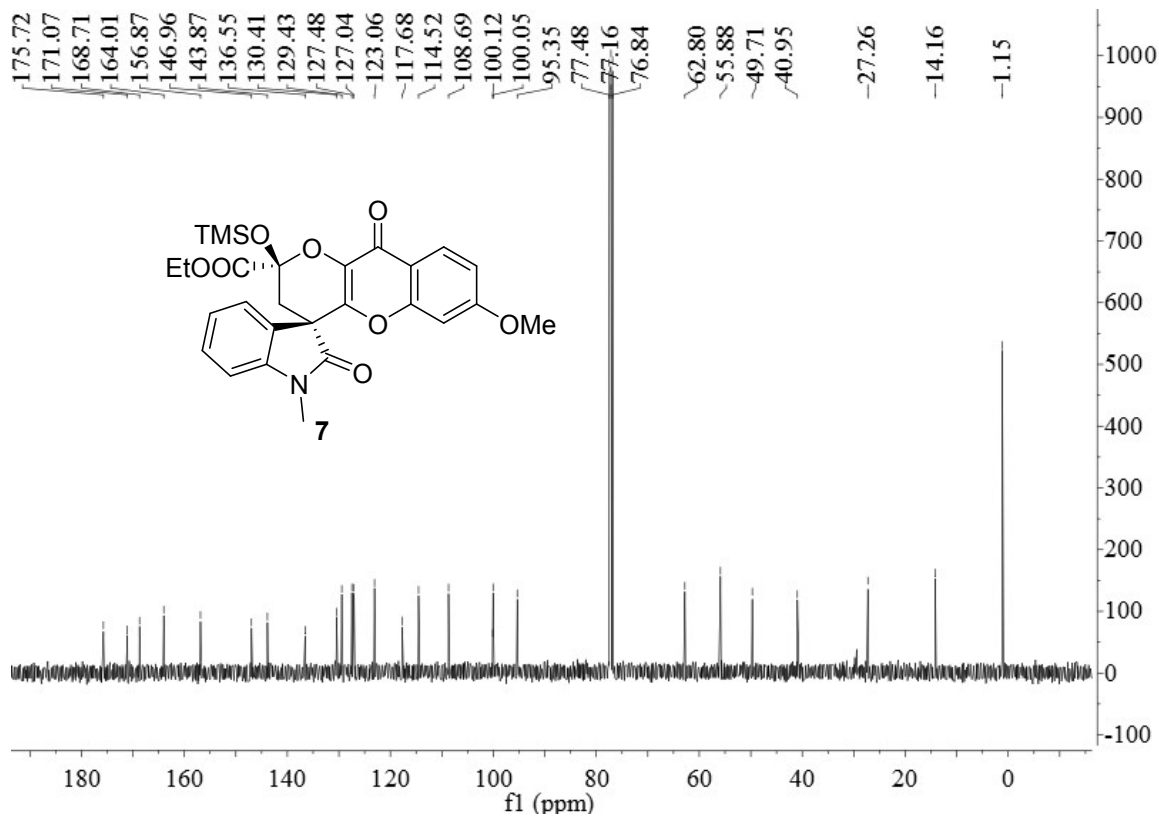



**Ethyl-1'-methyl-2-((methylsulfonyl)oxy)-2',5,10-trioxo-2,3,5,10-tetrahydrospiro[benzo[g]chromene-4,3'-indoline]-2-carboxylate 8**

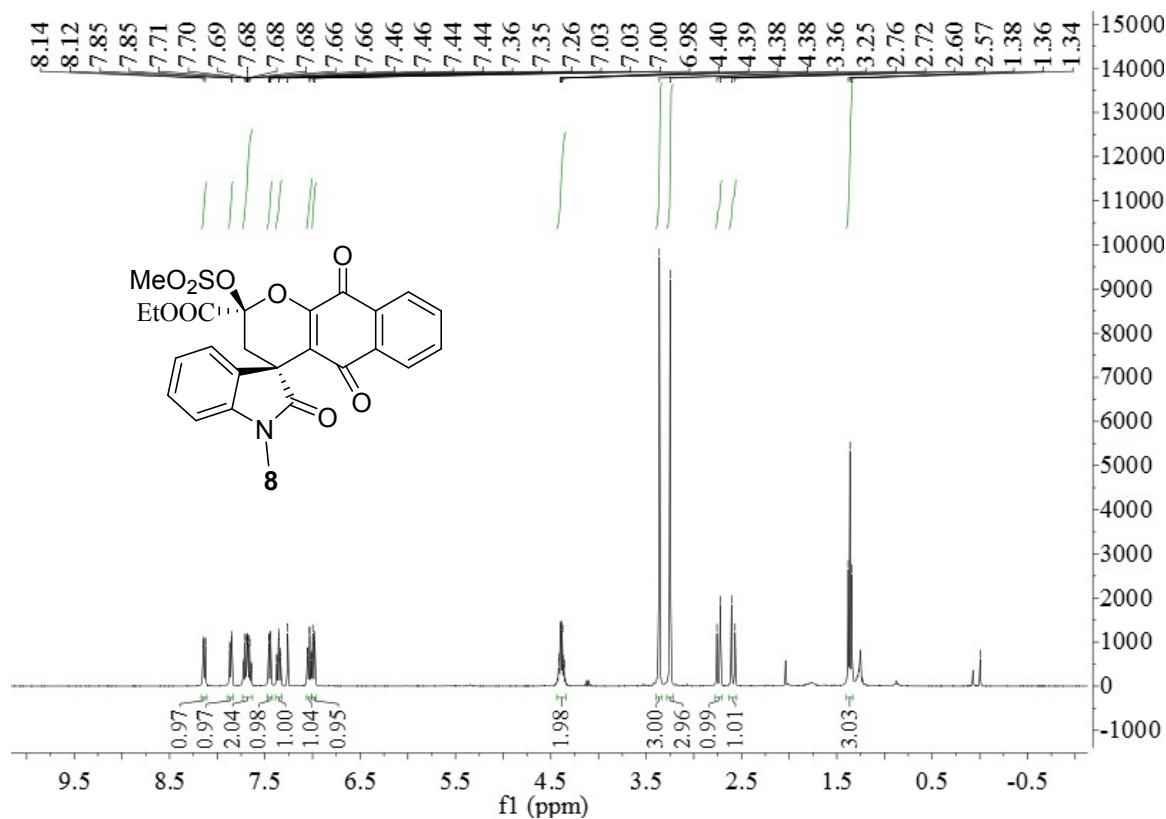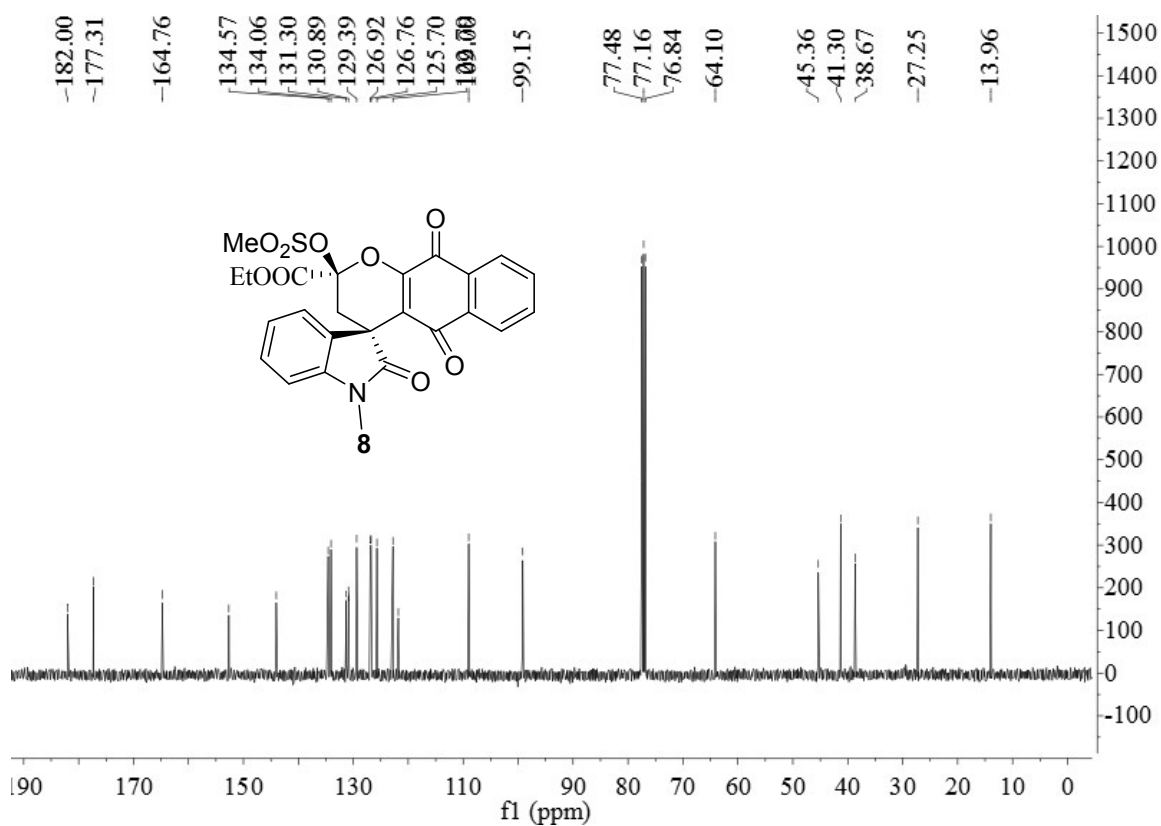

**5. HPLC spectra**

**Ethyl 2'-hydroxy-1-methyl-2,10'-dioxo-2',3'-dihydro-10'H-spiro[indoline-3,4'-pyrano[3,2-*b*]chromene]-2'-carboxylate 4a**

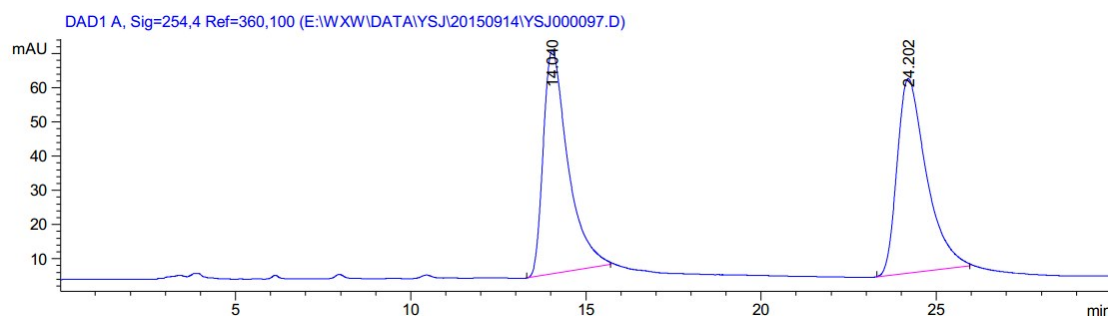

| Peak # | RetTime [min] | Type | Width [min] | Area [mAU*s] | Height [mAU] | Area %  |
|--------|---------------|------|-------------|--------------|--------------|---------|
| 1      | 14.040        | BB   | 0.7338      | 3217.62280   | 65.42322     | 49.3172 |
| 2      | 24.202        | BB   | 0.8686      | 3306.72314   | 56.84908     | 50.6828 |

Totals : 6524.34595 122.27230

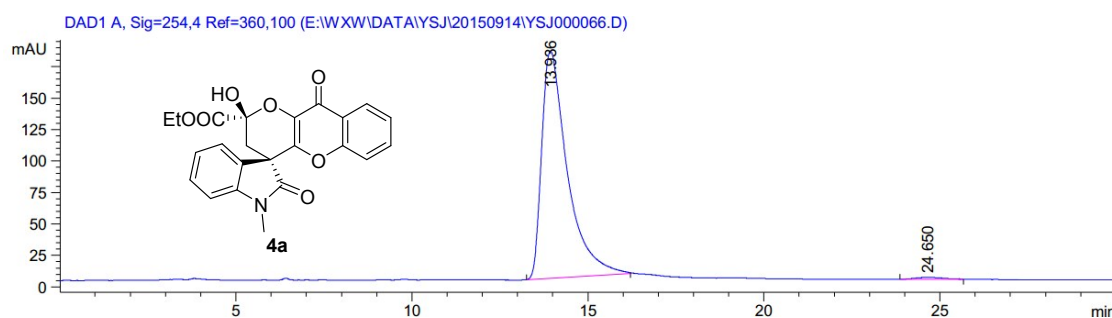

| Peak # | RetTime [min] | Type | Width [min] | Area [mAU*s] | Height [mAU] | Area %  |
|--------|---------------|------|-------------|--------------|--------------|---------|
| 1      | 13.936        | BB   | 0.7537      | 9152.50684   | 180.44893    | 99.1264 |
| 2      | 24.650        | MM R | 0.8756      | 80.65916     | 1.53531      | 0.8736  |

Totals : 9233.16600 181.98424

**Ethyl 2'-hydroxy-1-(methoxymethyl)-2,10'-dioxo-2',3'-dihydro-10'H-spiro[indoline-3,4'-pyrano[3,2-*b*]chromene]-2'-carboxylate 4b**

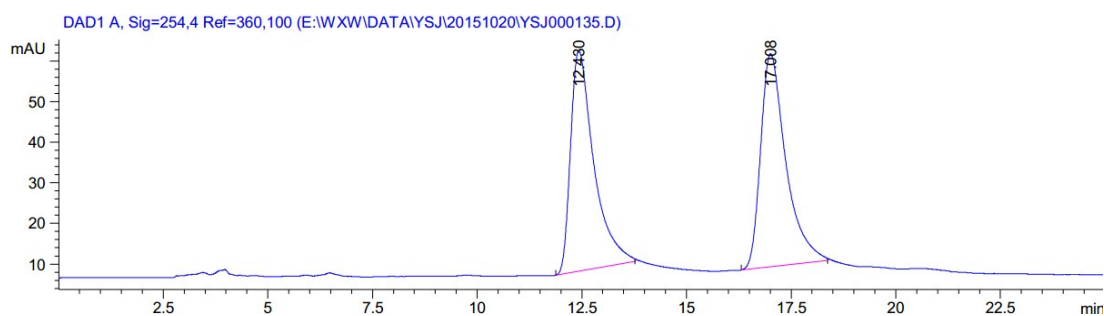

| Peak # | RetTime [min] | Type | Width [min] | Area [mAU*s] | Height [mAU] | Area %  |
|--------|---------------|------|-------------|--------------|--------------|---------|
| 1      | 12.430        | BB   | 0.5780      | 2102.57446   | 54.26806     | 48.8232 |
| 2      | 17.008        | BB   | 0.6257      | 2203.93457   | 52.50396     | 51.1768 |

Totals : 4306.50903 106.77202

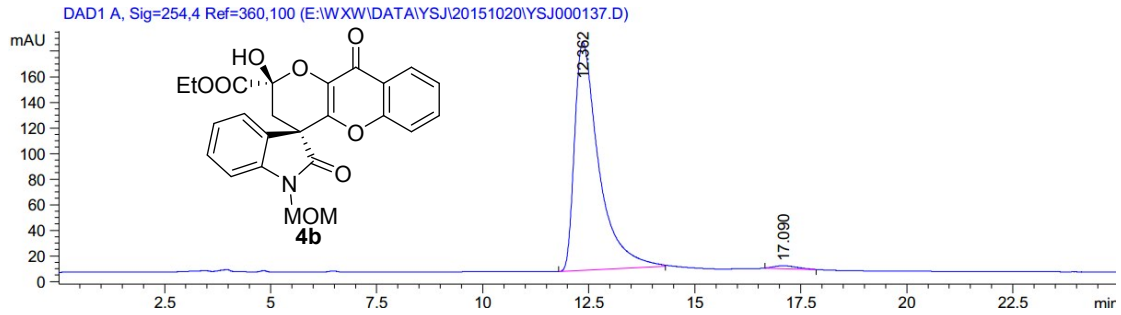

| Peak # | RetTime [min] | Type | Width [min] | Area [mAU*s] | Height [mAU] | Area %  |
|--------|---------------|------|-------------|--------------|--------------|---------|
| 1      | 12.362        | BB   | 0.5892      | 7103.74316   | 178.13443    | 98.7620 |
| 2      | 17.090        | BB   | 0.4822      | 89.04506     | 2.30777      | 1.2380  |

Totals : 7192.78822 180.44220

**Ethyl 1-benzyl-2'-hydroxy-2,10'-dioxo-2',3'-dihydro-10'H-spiro[indoline-3,4'-pyrano[3,2-b]chromene]-2'-carboxylate 4c**

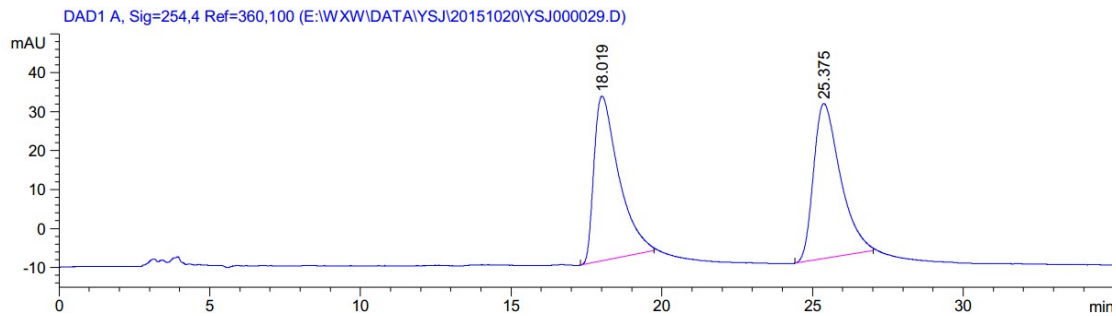

| Peak # | RetTime [min] | Type | Width [min] | Area [mAU*s] | Height [mAU] | Area %  |
|--------|---------------|------|-------------|--------------|--------------|---------|
| 1      | 18.019        | BB   | 0.8315      | 2409.38428   | 42.23662     | 49.4604 |
| 2      | 25.375        | BB   | 0.8960      | 2461.95923   | 39.78049     | 50.5396 |

Totals : 4871.34351 82.01712

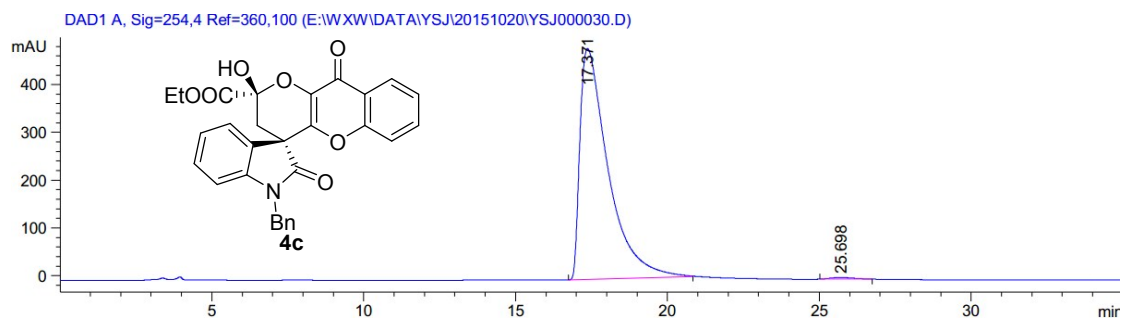

| Peak # | RetTime [min] | Type | Width [min] | Area [mAU*s] | Height [mAU] | Area %  |
|--------|---------------|------|-------------|--------------|--------------|---------|
| 1      | 17.371        | BB   | 0.9486      | 3.11348e4    | 482.64487    | 99.3749 |
| 2      | 25.698        | BB   | 0.6619      | 195.85359    | 3.51567      | 0.6251  |

Totals : 3.13307e4 486.16054

**Ethyl 1-allyl-2'-hydroxy-2,10'-dioxo-2',3'-dihydro-10'H-spiro[indoline-3,4'-pyrano[3,2-b]chromene]-2'-carboxylate 4d**

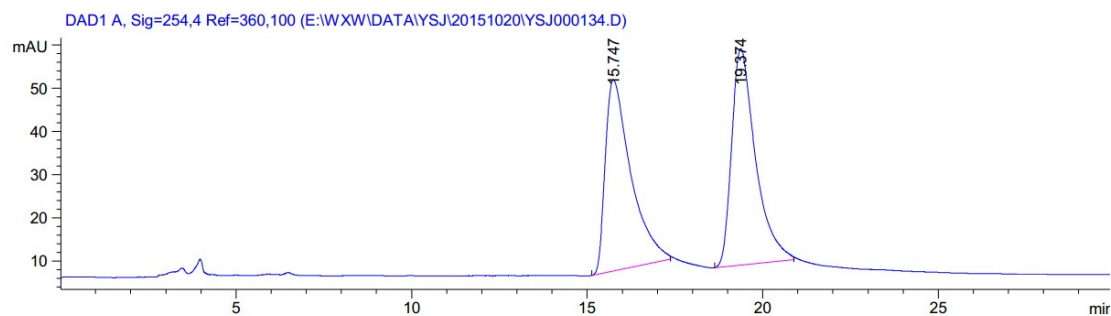

| Peak # | RetTime [min] | Type | Width [min] | Area [mAU*s] | Height [mAU] | Area %  |
|--------|---------------|------|-------------|--------------|--------------|---------|
| 1      | 15.747        | BB   | 0.7234      | 2243.50708   | 44.25544     | 48.7150 |
| 2      | 19.374        | BB   | 0.7012      | 2361.86865   | 49.99260     | 51.2850 |

Totals : 4605.37573 94.24804

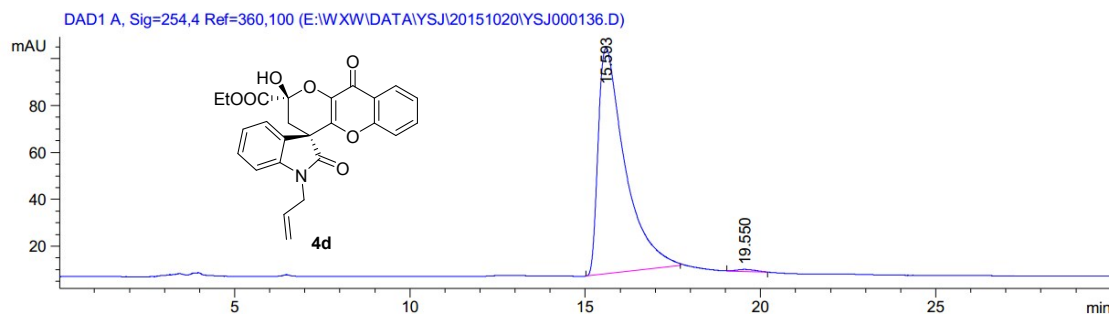

| Peak # | RetTime [min] | Type | Width [min] | Area [mAU*s] | Height [mAU] | Area %  |
|--------|---------------|------|-------------|--------------|--------------|---------|
| 1      | 15.593        | BB   | 0.7702      | 5119.03760   | 96.28848     | 99.3525 |
| 2      | 19.550        | MM R | 0.6286      | 33.36403     | 8.84553e-1   | 0.6475  |

Totals : 5152.40163 97.17303

**1-benzyl 2'-ethyl-2'-hydroxy-2,10'-dioxo-2',3'-dihydro-10'H-spiro[indoline-3,4'-pyrano[3,2-b]chromene]-1,2'-dicarboxylate4e**

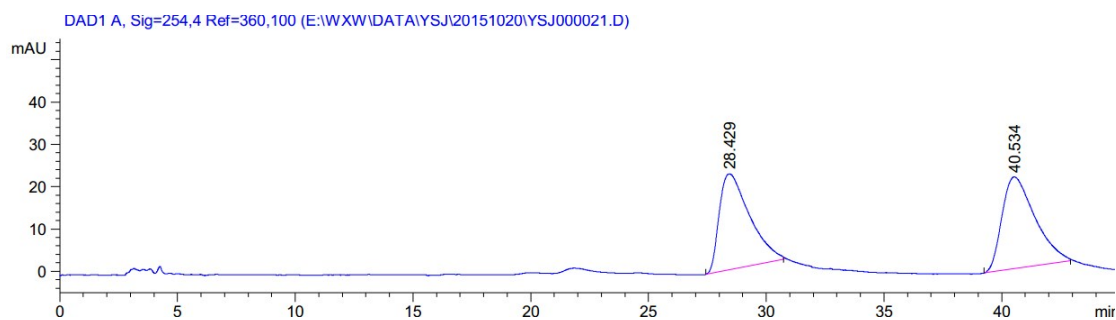

| Peak # | RetTime [min] | Type | Width [min] | Area [mAU*s] | Height [mAU] | Area %  |
|--------|---------------|------|-------------|--------------|--------------|---------|
| 1      | 28.429        | BB   | 1.1894      | 2021.06787   | 22.68575     | 48.9735 |
| 2      | 40.534        | BB   | 1.1878      | 2105.78833   | 21.66875     | 51.0265 |

Totals : 4126.85620 44.35450

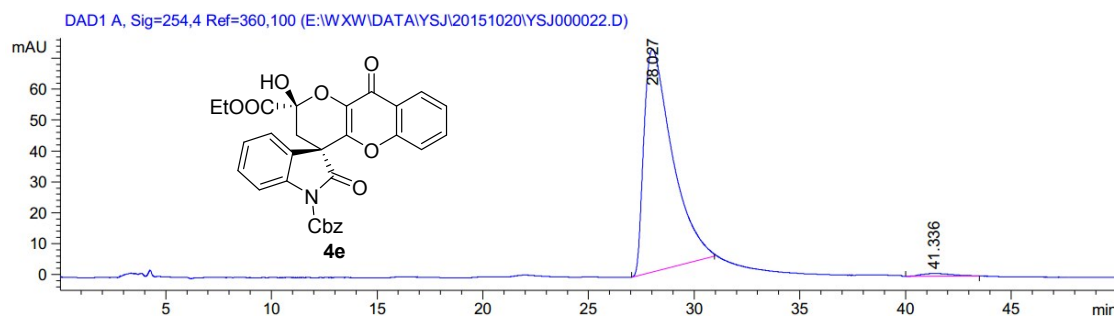

| Peak # | RetTime [min] | Type | Width [min] | Area [mAU*s] | Height [mAU] | Area %  |
|--------|---------------|------|-------------|--------------|--------------|---------|
| 1      | 28.027        | BB   | 1.3364      | 6737.96045   | 72.09135     | 98.7080 |
| 2      | 41.336        | MM R | 1.6883      | 88.19569     | 8.70631e-1   | 1.2920  |

Totals : 6826.15614 72.96198

**Ethyl 1-acetyl-2'-hydroxy-2,10'-dioxo-2',3'-dihydro-10'H-spiro[indoline-3,4'-pyrano[3,2-b]chromene]-2'-carboxylate4f**

DAD1 A, Sig=254,4 Ref=360,100 (E:\WXW\DATA\YSJ\20160113\YSJ000024.D)

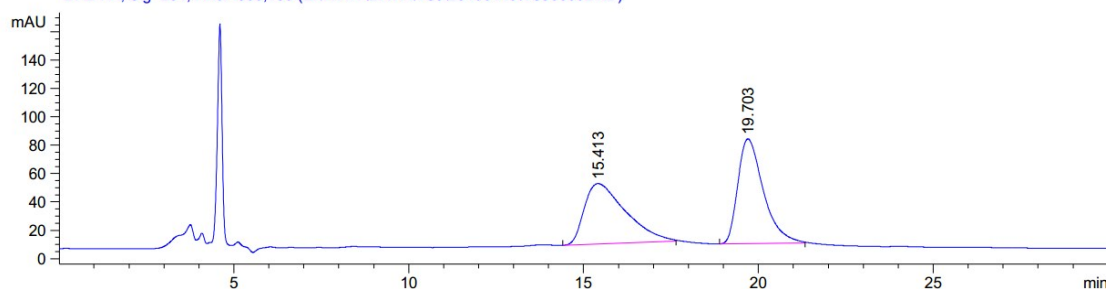

| Peak # | RetTime [min] | Type | Width [min] | Area [mAU*s] | Height [mAU] | Area %  |
|--------|---------------|------|-------------|--------------|--------------|---------|
| 1      | 15.413        | BB   | 1.1217      | 3484.34009   | 42.62595     | 48.1464 |
| 2      | 19.703        | BB   | 0.7818      | 3752.62231   | 73.97834     | 51.8536 |

Totals : 7236.96240 116.60429

DAD1 A, Sig=254,4 Ref=360,100 (E:\WXW\DATA\YSJ\20160113\YSJ000026.D)

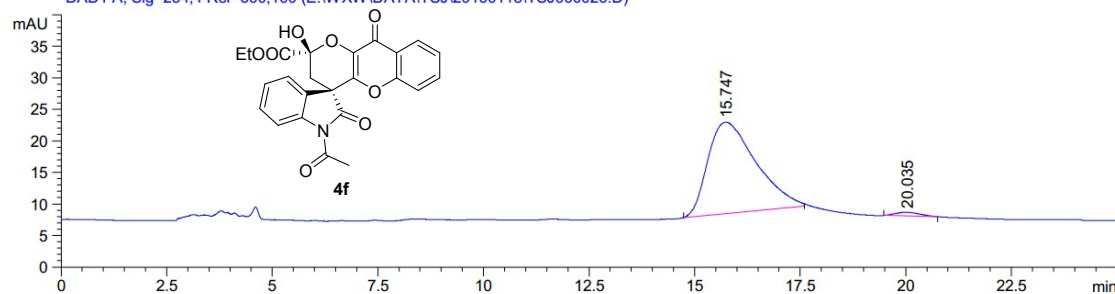

| Peak # | RetTime [min] | Type | Width [min] | Area [mAU*s] | Height [mAU] | Area %  |
|--------|---------------|------|-------------|--------------|--------------|---------|
| 1      | 15.747        | BB   | 0.9784      | 1146.07373   | 14.49519     | 97.9738 |
| 2      | 20.035        | MM R | 0.6677      | 23.70196     | 5.91638e-1   | 2.0262  |

Totals : 1169.77569 15.08683

**Ethyl 5-fluoro-2'-hydroxy-1-methyl-2,10'-dioxo-2',3'-dihydro-10'H-spiro [indoline-3,4'-pyrano[3,2-*b*]chromene]-2'-carboxylate 4g**

DAD1 A, Sig=254,4 Ref=360,100 (E:\WXW\DATA\YSJ\20151020\YSJ000003.D)

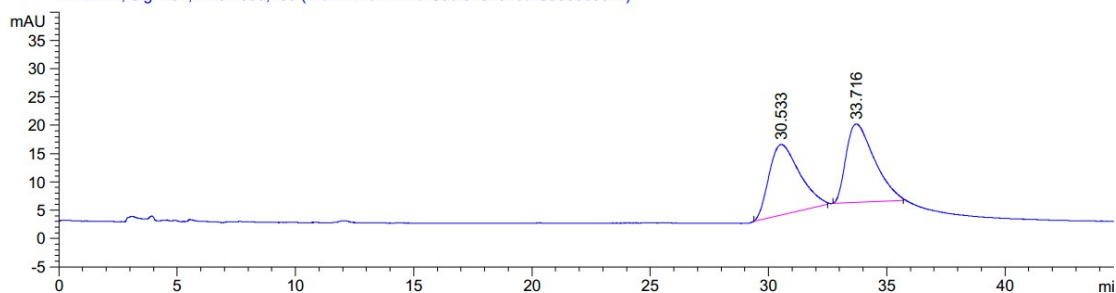

| Peak # | RetTime [min] | Type | Width [min] | Area [mAU*s] | Height [mAU] | Area %  |
|--------|---------------|------|-------------|--------------|--------------|---------|
| 1      | 30.533        | BB   | 1.0605      | 1111.14148   | 12.45931     | 49.0738 |
| 2      | 33.716        | BB   | 1.0111      | 1153.08521   | 13.85361     | 50.9262 |

Totals : 2264.22668 26.31292

DAD1 A, Sig=254,4 Ref=360,100 (E:\WXW\DATA\YSJ\20151020\YSJ000004.D)

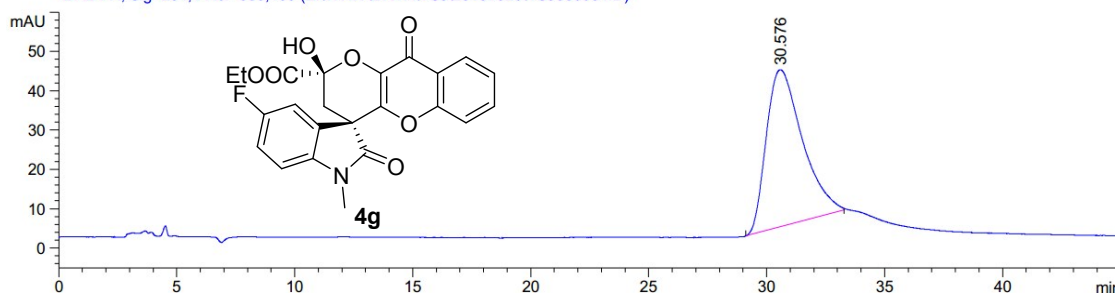

| Peak # | RetTime [min] | Type | Width [min] | Area [mAU*s] | Height [mAU] | Area %   |
|--------|---------------|------|-------------|--------------|--------------|----------|
| 1      | 30.576        | BB   | 1.5023      | 4242.28662   | 39.96831     | 100.0000 |

Totals : 4242.28662 39.96831

**Ethyl 5-chloro-2'-hydroxy-1-methyl-2,10'-dioxo-2',3'-dihydro-10'H-spiro [indoline-3,4'-pyrano[3,2-*b*]chromene]-2'-carboxylate 4h**

DAD1 A, Sig=254,4 Ref=360,100 (E:\WXW\DATA\YSJ\20151020\YSJ000019.D)

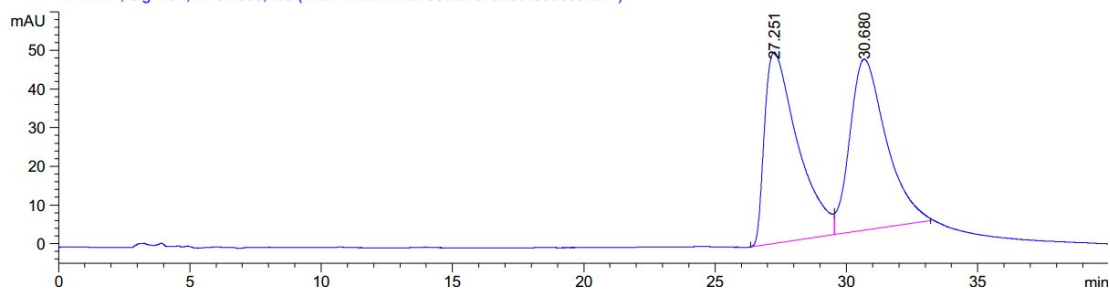

| Peak #   | RetTime [min] | Type | Width [min] | Area [mAU*s] | Height [mAU] | Area %  |
|----------|---------------|------|-------------|--------------|--------------|---------|
| 1        | 27.251        | BB   | 1.2416      | 4336.33936   | 49.52062     | 50.3223 |
| 2        | 30.680        | BB   | 1.4080      | 4280.78809   | 44.27415     | 49.6777 |
| Totals : |               |      |             | 8617.12744   | 93.79477     |         |

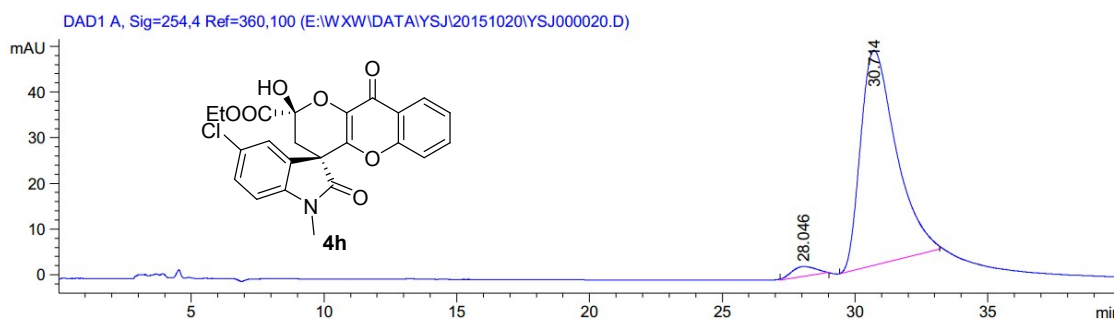

| Peak #   | RetTime [min] | Type | Width [min] | Area [mAU*s] | Height [mAU] | Area %  |
|----------|---------------|------|-------------|--------------|--------------|---------|
| 1        | 28.046        | MM R | 0.7436      | 138.00710    | 2.20083      | 3.0503  |
| 2        | 30.714        | BB   | 1.3623      | 4386.33057   | 47.02105     | 96.9497 |
| Totals : |               |      |             | 4524.33766   | 49.22188     |         |

**Ethyl 5-bromo-2'-hydroxy-1-methyl-2,10'-dioxo-2',3'-dihydro-10'H-spiro [indoline-3,4'-pyrano[3,2-*b*]chromene]-2'-carboxylate 4i**

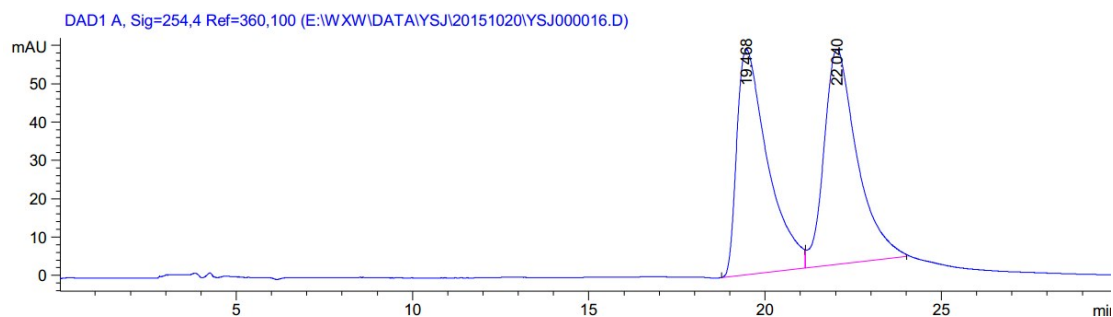

| Peak #   | RetTime [min] | Type | Width [min] | Area [mAU*s] | Height [mAU] | Area %  |
|----------|---------------|------|-------------|--------------|--------------|---------|
| 1        | 19.468        | BB   | 0.8774      | 3567.27368   | 58.83055     | 49.2951 |
| 2        | 22.040        | BB   | 0.9594      | 3669.30151   | 56.07469     | 50.7049 |
| Totals : |               |      |             | 7236.57520   | 114.90524    |         |



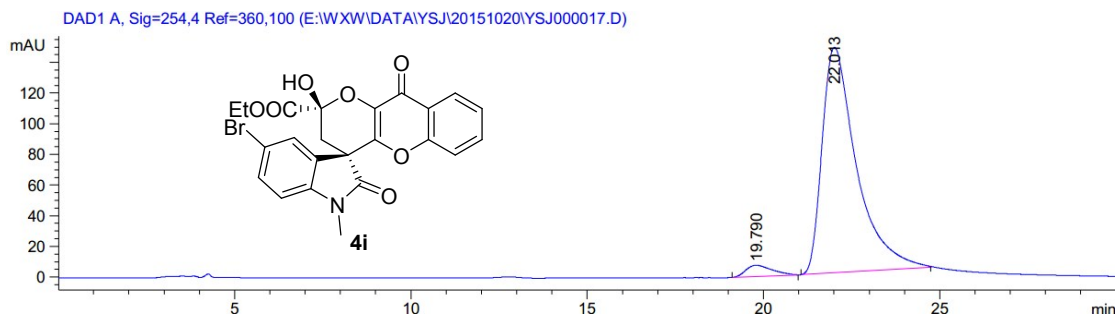

| Peak # | RetTime [min] | Type | Width [min] | Area [mAU*s] | Height [mAU] | Area %  |
|--------|---------------|------|-------------|--------------|--------------|---------|
| 1      | 19.790        | BB   | 0.6976      | 378.29303    | 7.33628      | 3.6523  |
| 2      | 22.013        | BB   | 1.0081      | 9979.23340   | 146.97752    | 96.3477 |

Totals : 1.03575e4 154.31380

**Ethyl 2'-hydroxy-1,5-dimethyl-2,10'-dioxo-2',3'-dihydro-10'H-spiro[indoline-3,4'-pyrano[3,2-b]chromene]-2'-carboxylate 4j**

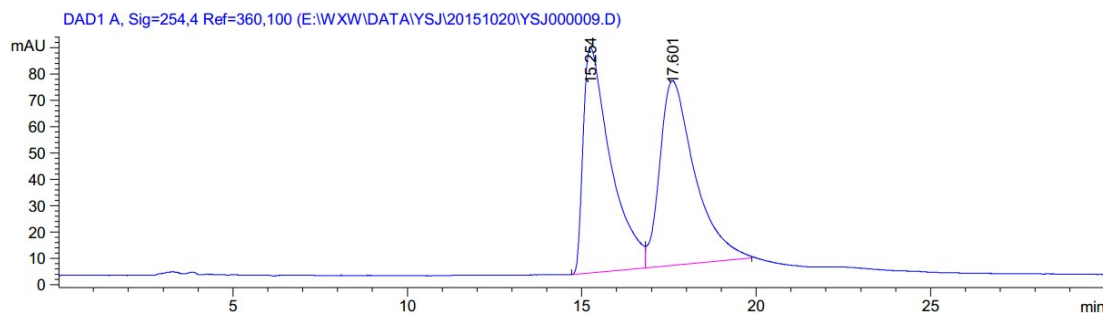

| Peak # | RetTime [min] | Type | Width [min] | Area [mAU*s] | Height [mAU] | Area %  |
|--------|---------------|------|-------------|--------------|--------------|---------|
| 1      | 15.254        | BB   | 0.7923      | 4678.19775   | 85.51177     | 48.7580 |
| 2      | 17.601        | BB   | 1.0291      | 4916.53760   | 70.19901     | 51.2420 |

Totals : 9594.73535 155.71078

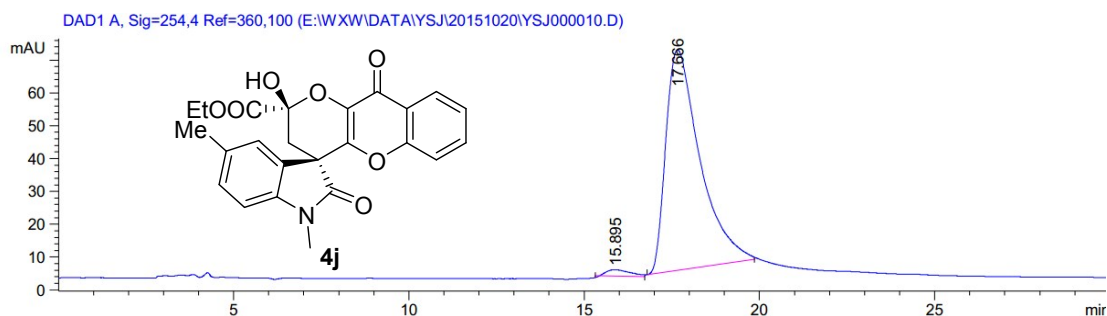

| Peak # | RetTime [min] | Type | Width [min] | Area [mAU*s] | Height [mAU] | Area %  |
|--------|---------------|------|-------------|--------------|--------------|---------|
| 1      | 15.895        | MM R | 0.8109      | 92.14249     | 1.89384      | 1.9821  |
| 2      | 17.666        | BB   | 1.0054      | 4556.61621   | 67.17547     | 98.0179 |

Totals : 4648.75871 69.06931

**Ethyl 2'-hydroxy-5-methoxy-1-methyl-2,10'-dioxo-2',3'-dihydro-10'H-spiro [indoline-3,4'-pyrano[3,2-b]chromene]-2'-carboxylate 4k**

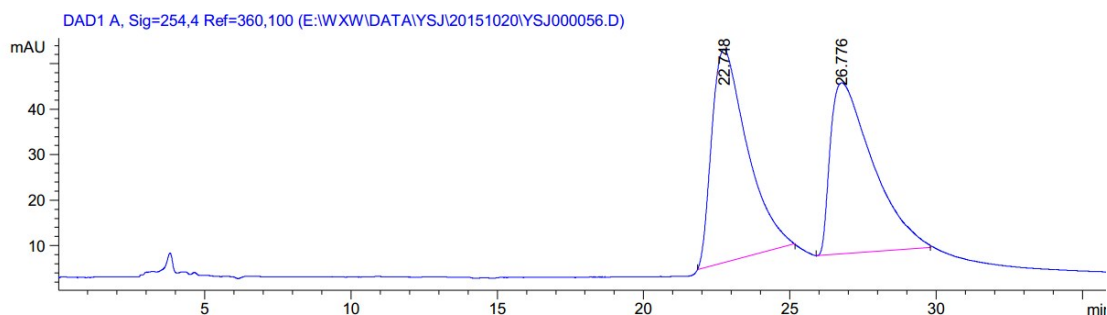

| Peak # | RetTime [min] | Type | Width [min] | Area [mAU*s] | Height [mAU] | Area %  |
|--------|---------------|------|-------------|--------------|--------------|---------|
| 1      | 22.748        | MM R | 1.4036      | 3946.73608   | 46.86358     | 50.9388 |
| 2      | 26.776        | BB   | 1.3745      | 3801.26660   | 37.62954     | 49.0612 |

Totals : 7748.00269 84.49311

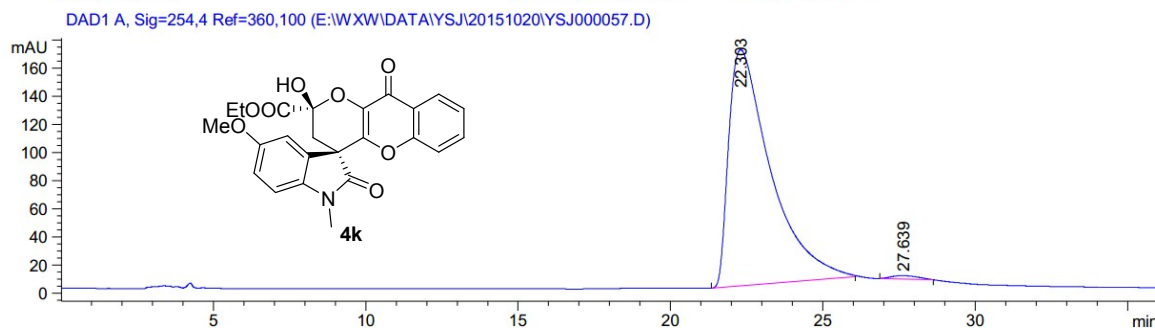

| Peak # | RetTime [min] | Type | Width [min] | Area [mAU*s] | Height [mAU] | Area %  |
|--------|---------------|------|-------------|--------------|--------------|---------|
| 1      | 22.303        | BB   | 1.3751      | 1.60207e4    | 167.60925    | 99.0847 |
| 2      | 27.639        | MM R | 1.0050      | 147.99214    | 2.45422      | 0.9153  |

Totals : 1.61687e4 170.06347

**Ethyl 6-chloro-2'-hydroxy-1-methyl-2,10'-dioxo-2',3'-dihydro-10'H-spiro[indoline-3,4'-pyrano[3,2-b]chromene]-2'-carboxylate 4I**

DAD1 A, Sig=254,4 Ref=360,100 (E:\WXW\DATA\YSJ\20151020\YSJ000052.D)

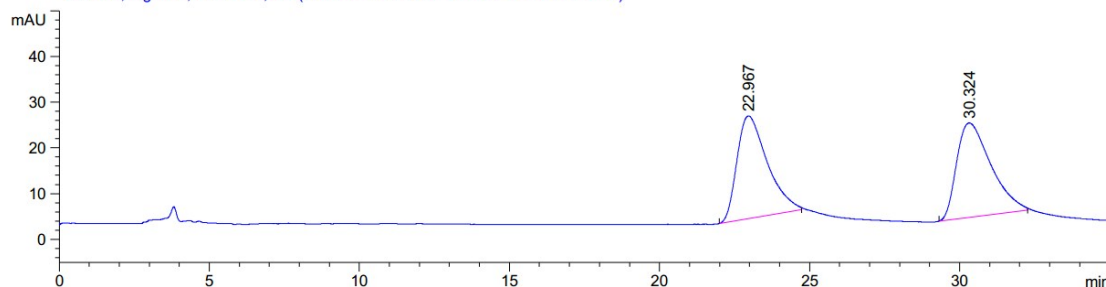

| Peak # | RetTime [min] | Type | Width [min] | Area [mAU*s] | Height [mAU] | Area %  |
|--------|---------------|------|-------------|--------------|--------------|---------|
| 1      | 22.967        | BB   | 0.9890      | 1571.45581   | 22.43939     | 49.0396 |
| 2      | 30.324        | BB   | 1.1269      | 1633.00806   | 20.64290     | 50.9604 |

Totals : 3204.46387 43.08228

DAD1 A, Sig=254,4 Ref=360,100 (E:\WXW\DATA\YSJ\20151020\YSJ000053.D)

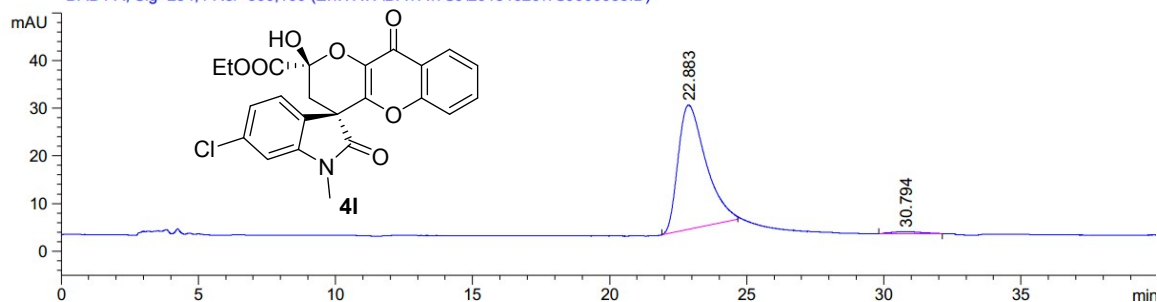

| Peak # | RetTime [min] | Type | Width [min] | Area [mAU*s] | Height [mAU] | Area %  |
|--------|---------------|------|-------------|--------------|--------------|---------|
| 1      | 22.883        | BB   | 1.0257      | 1828.51318   | 26.02448     | 98.2637 |
| 2      | 30.794        | MM R | 1.1908      | 32.30936     | 4.52210e-1   | 1.7363  |

Totals : 1860.82255 26.47669

**Ethyl 6-bromo-2'-hydroxy-1-methyl-2,10'-dioxo-2',3'-dihydro-10'H-spiro[indoline-3,4'-pyrano[3,2-b]chromene]-2'-carboxylate 4m**

DAD1 A, Sig=254,4 Ref=360,100 (E:\WXW\DATA\YSJ\20151020\YSJ000171.D)

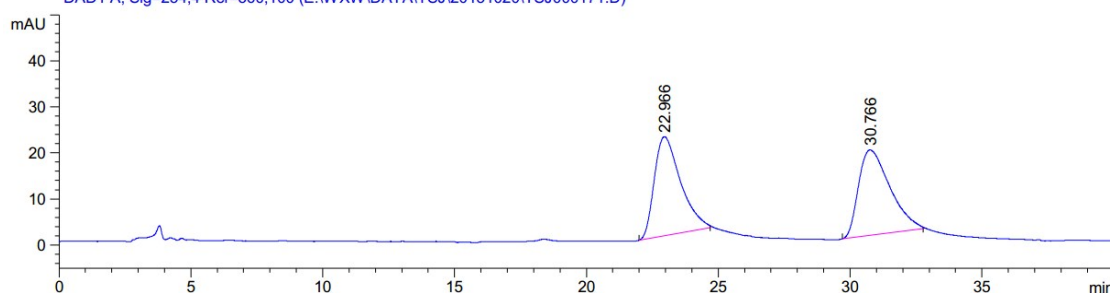

| Peak # | RetTime [min] | Type | Width [min] | Area [mAU*s] | Height [mAU] | Area %  |
|--------|---------------|------|-------------|--------------|--------------|---------|
| 1      | 22.966        | BB   | 0.9657      | 1494.78760   | 21.53656     | 49.2990 |
| 2      | 30.766        | BB   | 1.1229      | 1537.30017   | 18.54871     | 50.7010 |

Totals : 3032.08777 40.08527

DAD1 A, Sig=254,4 Ref=360,100 (E:\WXW\DATA\YSJ\20151020\YSJ000172.D)

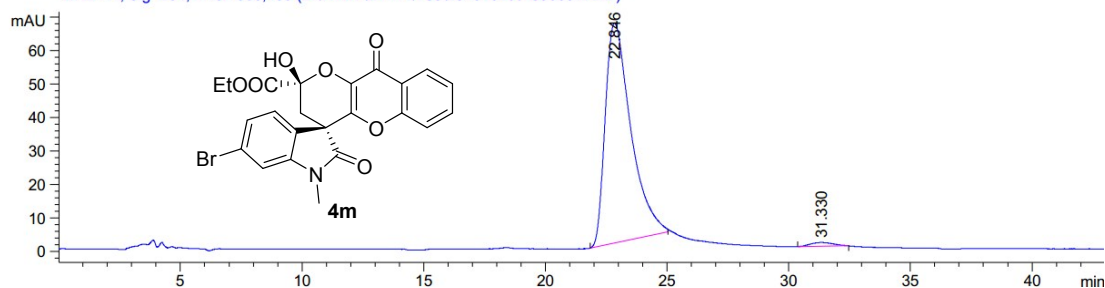

| Peak # | RetTime [min] | Type | Width [min] | Area [mAU*s] | Height [mAU] | Area %  |
|--------|---------------|------|-------------|--------------|--------------|---------|
| 1      | 22.846        | BB   | 1.0894      | 4810.16650   | 65.75564     | 98.4816 |
| 2      | 31.330        | MM R | 1.0880      | 74.16244     | 1.13608      | 1.5184  |

Totals : 4884.32894 66.89172

**Ethyl 2'-hydroxy-6-methoxy-1-methyl-2,10'-dioxo-2',3'-dihydro-10'H-spiro [indoline-3,4'-pyrano[3,2-*b*]chromene]-2'-carboxylate 4n**

DAD1 A, Sig=254,4 Ref=360,100 (E:\WXW\DATA\YSJ\20151020\YSJ000173.D)

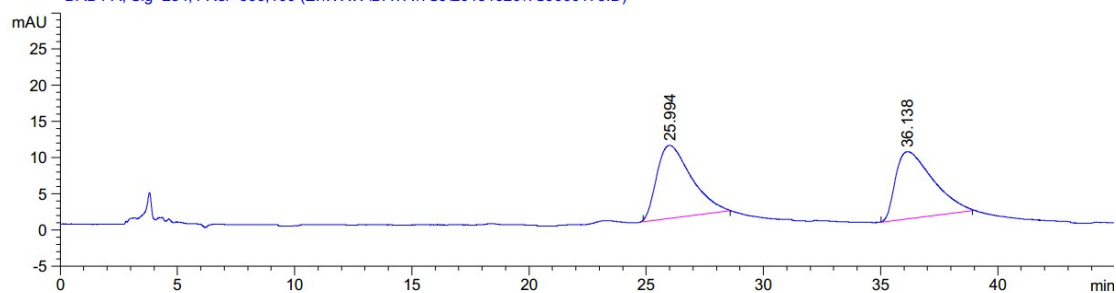

| Peak # | RetTime [min] | Type | Width [min] | Area [mAU*s] | Height [mAU] | Area %  |
|--------|---------------|------|-------------|--------------|--------------|---------|
| 1      | 25.994        | MM R | 1.7062      | 1034.94873   | 10.10994     | 50.1373 |
| 2      | 36.138        | MM R | 1.8427      | 1029.28235   | 9.30976      | 49.8627 |

Totals : 2064.23108 19.41970

DAD1 A, Sig=254,4 Ref=360,100 (E:\WXW\DATA\YSJ\20151020\YSJ000174.D)

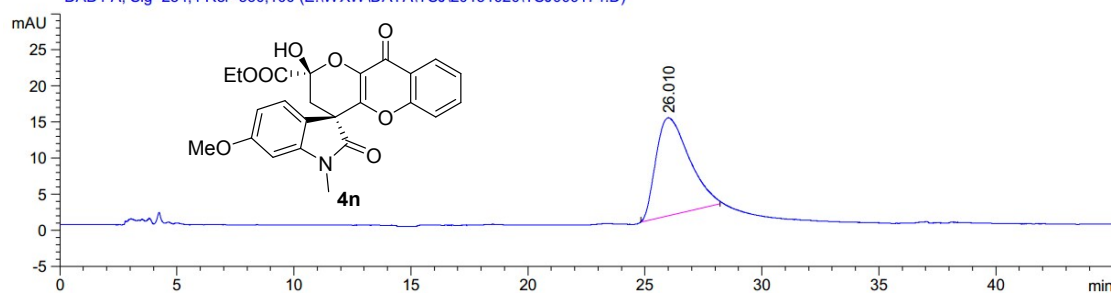

| Peak # | RetTime [min] | Type | Width [min] | Area [mAU*s] | Height [mAU] | Area %   |
|--------|---------------|------|-------------|--------------|--------------|----------|
| 1      | 26.010        | BB   | 1.1677      | 1338.87024   | 13.58643     | 100.0000 |

Totals : 1338.87024 13.58643

## Ethyl 7-fluoro-2'-hydroxy-1-methyl-2,10'-dioxo-2',3'-dihydro-10'H-spiro[indoline-3,4'-pyrano[3,2-*b*]chromene]-2'-carboxylate 4o

DAD1 A, Sig=254,4 Ref=360,100 (E:\WXW\DATA\YSJ\20151020\YSJ000175.D)

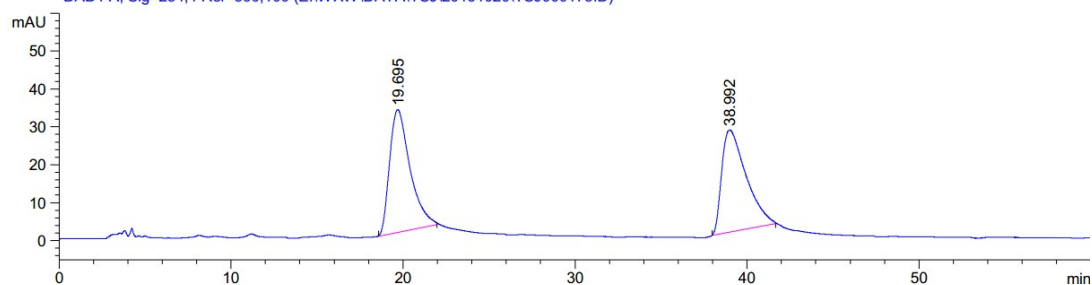

| Peak # | RetTime [min] | Type | Width [min] | Area [mAU*s] | Height [mAU] | Area %  |
|--------|---------------|------|-------------|--------------|--------------|---------|
| 1      | 19.695        | MM R | 1.3759      | 2670.78442   | 32.35140     | 50.1927 |
| 2      | 38.992        | MM R | 1.6375      | 2650.27881   | 26.97417     | 49.8073 |

Totals : 5321.06323 59.32557

DAD1 A, Sig=254,4 Ref=360,100 (E:\WXW\DATA\YSJ\20151020\YSJ000176.D)

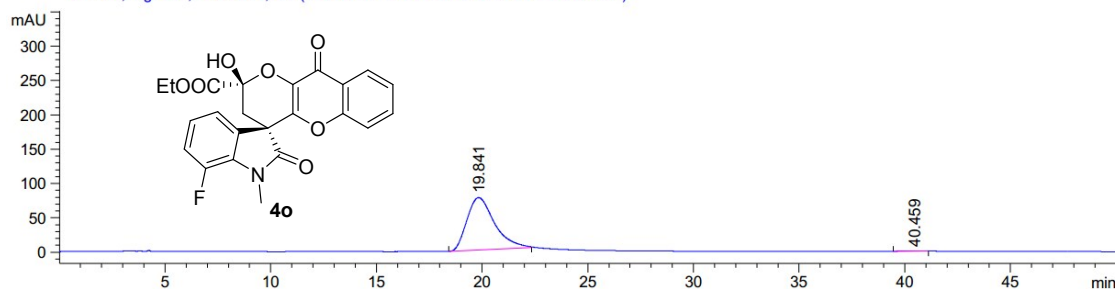

| Peak # | RetTime [min] | Type | Width [min] | Area [mAU*s] | Height [mAU] | Area %  |
|--------|---------------|------|-------------|--------------|--------------|---------|
| 1      | 19.841        | BB   | 1.3625      | 6898.83057   | 76.18313     | 99.5597 |
| 2      | 40.459        | MM R | 0.9463      | 30.50644     | 5.37286e-1   | 0.4403  |

Totals : 6929.33700 76.72041

**Ethyl 2'-hydroxy-1,7-dimethyl-2,10'-dioxo-2',3'-dihydro-10'H-spiro[indoline-3,4'-pyrano[3,2-*b*]chromene]-2'-carboxylate 4p**

DAD1 A, Sig=254.4 Ref=360,100 (E:\WXW\DATA\YSJ\20151020\YSJ000024.D)

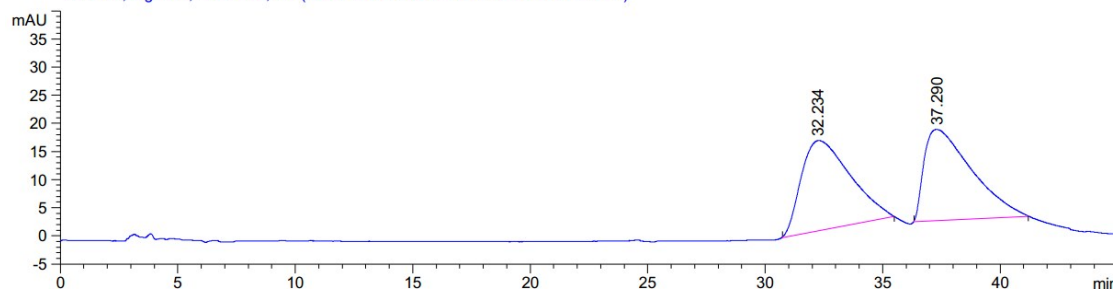

| Peak # | RetTime [min] | Type | Width [min] | Area [mAU*s] | Height [mAU] | Area %  |
|--------|---------------|------|-------------|--------------|--------------|---------|
| 1      | 32.234        | MM R | 2.4028      | 2318.36230   | 16.08074     | 50.4078 |
| 2      | 37.290        | MM R | 2.3472      | 2280.85034   | 16.19520     | 49.5922 |

Totals : 4599.21265 32.27595

DAD1 A, Sig=254.4 Ref=360,100 (E:\WXW\DATA\YSJ\20151020\YSJ000025.D)

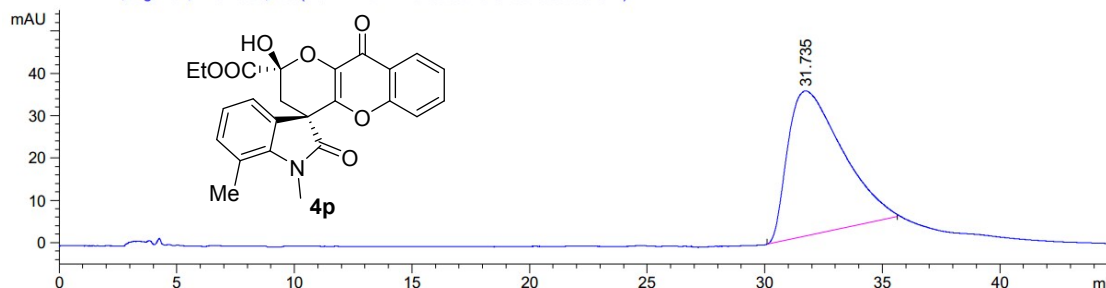

| Peak # | RetTime [min] | Type | Width [min] | Area [mAU*s] | Height [mAU] | Area %   |
|--------|---------------|------|-------------|--------------|--------------|----------|
| 1      | 31.735        | BB   | 1.8955      | 5495.75195   | 34.29660     | 100.0000 |

Totals : 5495.75195 34.29660

**Ethyl 2'-hydroxy-1,5,7-trimethyl-2,10'-dioxo-2',3'-dihydro-10'H-spiro[indoline-3,4'-pyrano[3,2-*b*]chromene]-2'-carboxylate 4q**

DAD1 A, Sig=254.4 Ref=360,100 (E:\WXW\DATA\YSJ\20151020\YSJ000006.D)

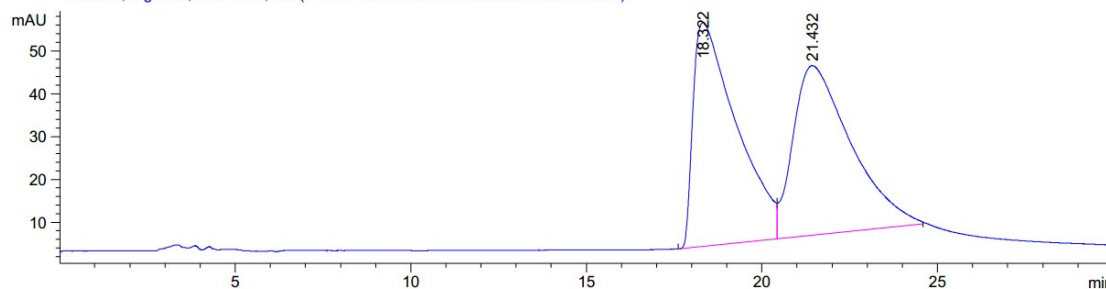

| Peak # | RetTime [min] | Type | Width [min] | Area [mAU*s] | Height [mAU] | Area %  |
|--------|---------------|------|-------------|--------------|--------------|---------|
| 1      | 18.322        | BV   | 1.1735      | 4480.33936   | 52.29545     | 49.6593 |
| 2      | 21.432        | VB   | 1.5225      | 4541.81445   | 39.58774     | 50.3407 |

Totals : 9022.15381 91.88319

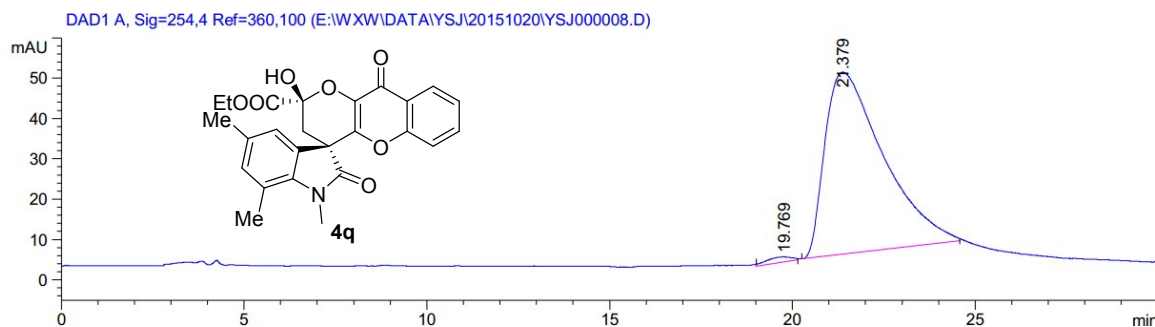

| Peak # | RetTime [min] | Type | Width [min] | Area [mAU*s] | Height [mAU] | Area %  |
|--------|---------------|------|-------------|--------------|--------------|---------|
| 1      | 19.769        | MM R | 0.6400      | 64.79082     | 1.22321      | 1.2766  |
| 2      | 21.379        | BB   | 1.5345      | 5010.36963   | 45.08607     | 98.7234 |

Totals : 5075.16045 46.30928

**Ethyl 5,6-difluoro-2'-hydroxy-1-methyl-2,10'-dioxo-2',3'-dihydro-10'H-spiro [indoline-3,4'-pyrano[3,2-*b*]chromene]-2'-carboxylate 4r**

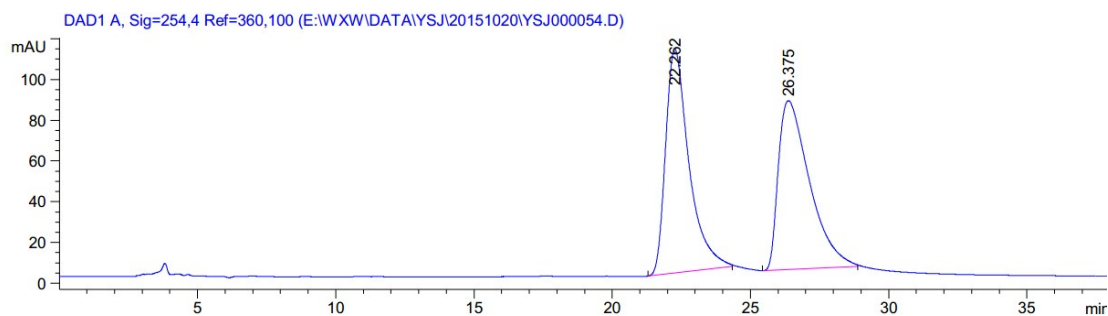

| Peak # | RetTime [min] | Type | Width [min] | Area [mAU*s] | Height [mAU] | Area %  |
|--------|---------------|------|-------------|--------------|--------------|---------|
| 1      | 22.262        | BB   | 0.8865      | 6490.21143   | 109.97916    | 50.0013 |
| 2      | 26.375        | BB   | 1.1830      | 6489.86816   | 82.92921     | 49.9987 |

Totals : 1.29801e4 192.90836

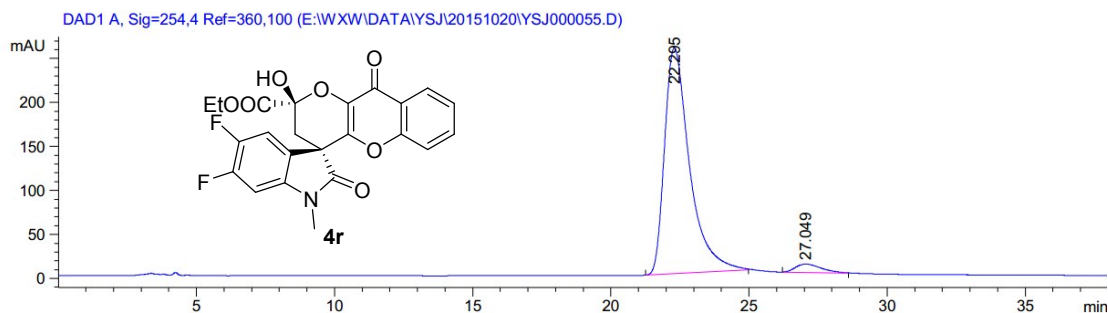



| Peak # | RetTime [min] | Type | Width [min] | Area [mAU*s] | Height [mAU] | Area %  |
|--------|---------------|------|-------------|--------------|--------------|---------|
| 1      | 22.295        | BB   | 0.9528      | 1.61579e4    | 256.55420    | 96.3889 |
| 2      | 27.049        | BB   | 0.8077      | 605.34357    | 9.42067      | 3.6111  |

Totals : 1.67632e4 265.97487

**Methyl-2'-hydroxy-1-methyl-2,10'-dioxo-2',3'-dihydro-10'H-spiro[indoline-3,4'-pyrano[3,2-b]chromene]-2'-carboxylate 4s**

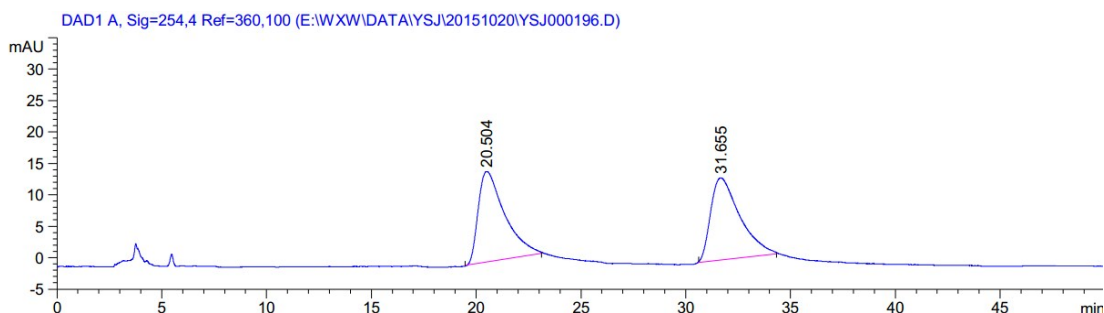

| Peak # | RetTime [min] | Type | Width [min] | Area [mAU*s] | Height [mAU] | Area %  |
|--------|---------------|------|-------------|--------------|--------------|---------|
| 1      | 20.504        | MM R | 1.4593      | 1260.40442   | 14.39524     | 49.9723 |
| 2      | 31.655        | MM R | 1.6140      | 1261.79944   | 13.02959     | 50.0277 |

Totals : 2522.20386 27.42484

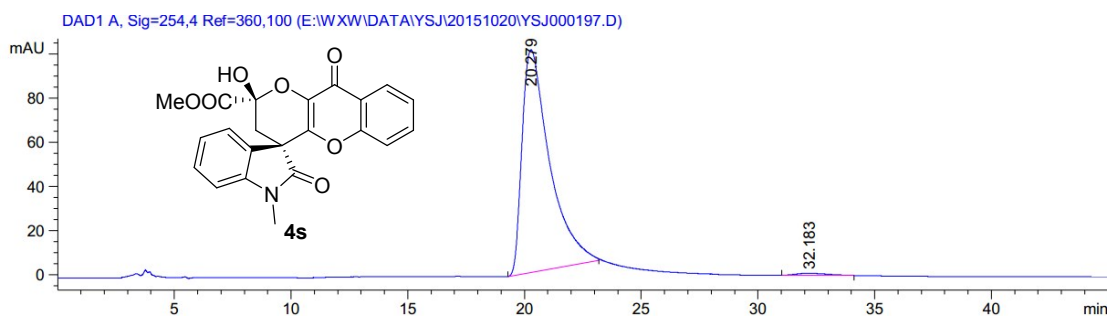

| Peak # | RetTime [min] | Type | Width [min] | Area [mAU*s] | Height [mAU] | Area %  |
|--------|---------------|------|-------------|--------------|--------------|---------|
| 1      | 20.279        | BB   | 1.1899      | 8348.59961   | 101.04670    | 98.9346 |
| 2      | 32.183        | MM R | 1.5266      | 89.90571     | 9.81533e-1   | 1.0654  |

Totals : 8438.50532 102.02823

**Ethyl 8'-fluoro-2'-hydroxy-1-methyl-2,10'-dioxo-2',3'-dihydro-10'H-spiro [indoline-3,4'-pyrano[3,2-*b*]chromene]-2'-carboxylate 4t**

DAD1 A, Sig=254,4 Ref=360,100 (E:\WXW\DATA\YSJ\20151020\YSJ000110.D)

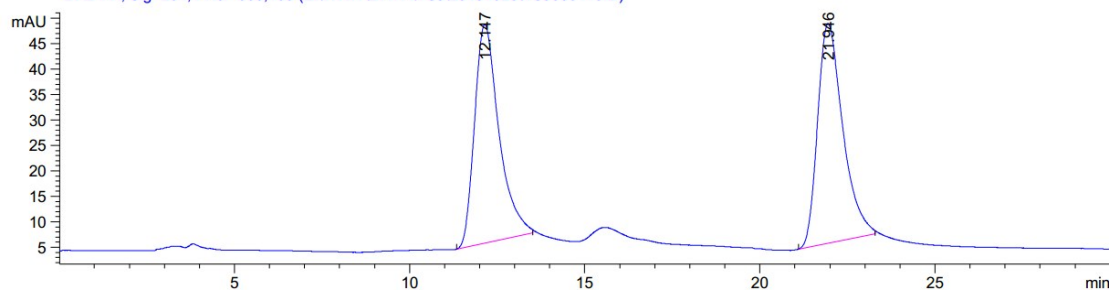

| Peak # | RetTime [min] | Type | Width [min] | Area [mAU*s] | Height [mAU] | Area %  |
|--------|---------------|------|-------------|--------------|--------------|---------|
| 1      | 12.147        | BB   | 0.7248      | 2082.40625   | 43.01824     | 49.1594 |
| 2      | 21.946        | BB   | 0.7544      | 2153.62573   | 43.14286     | 50.8406 |

Totals : 4236.03198 86.16110

DAD1 A, Sig=254,4 Ref=360,100 (E:\WXW\DATA\YSJ\20151020\YSJ000111.D)

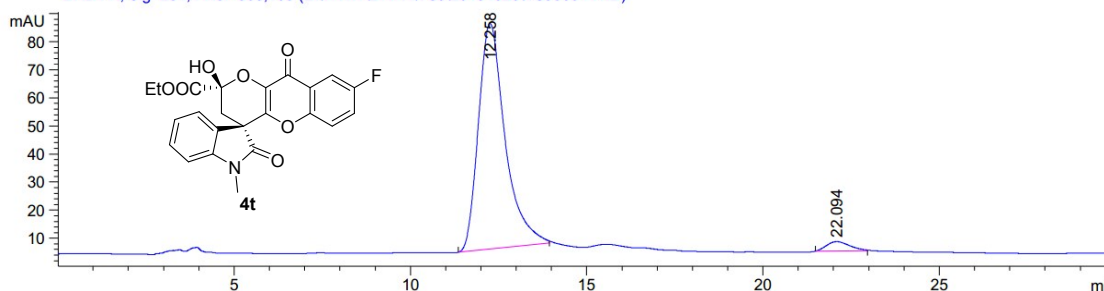

| Peak # | RetTime [min] | Type | Width [min] | Area [mAU*s] | Height [mAU] | Area %  |
|--------|---------------|------|-------------|--------------|--------------|---------|
| 1      | 12.258        | BB   | 0.7933      | 4220.74707   | 80.29678     | 96.5261 |
| 2      | 22.094        | BB   | 0.6110      | 151.90244    | 3.32475      | 3.4739  |

Totals : 4372.64951 83.62153

**Ethyl 8'-bromo-2'-hydroxy-1-methyl-2,10'-dioxo-2',3'-dihydro-10'H-spiro [indoline-3,4'-pyrano[3,2-*b*]chromene]-2'-carboxylate 4u**

DAD1 A, Sig=254,4 Ref=360,100 (E:\WXW\DATA\YSJ\20151020\YSJ000112.D)

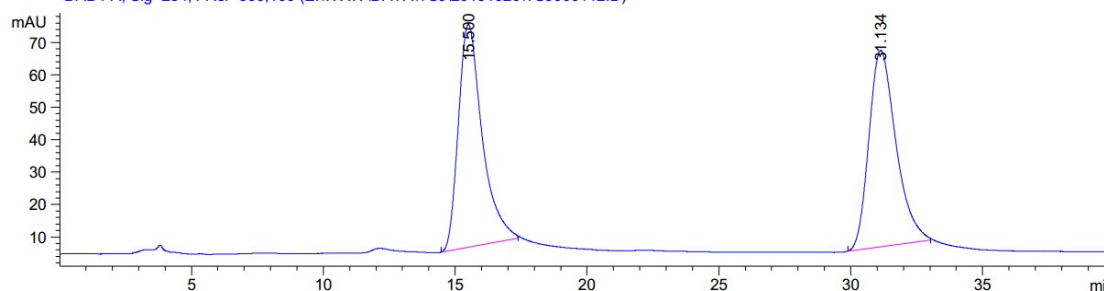

| Peak # | RetTime [min] | Type | Width [min] | Area [mAU*s] | Height [mAU] | Area %  |
|--------|---------------|------|-------------|--------------|--------------|---------|
| 1      | 15.500        | BB   | 0.9360      | 4312.88428   | 68.74043     | 49.8998 |
| 2      | 31.134        | BB   | 1.0639      | 4330.20850   | 60.58333     | 50.1002 |

Totals : 8643.09277 129.32376

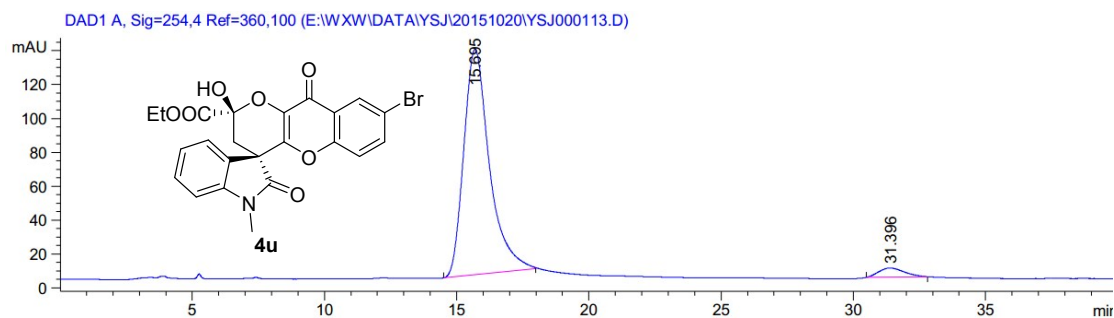

| Peak # | RetTime [min] | Type | Width [min] | Area [mAU*s] | Height [mAU] | Area %  |
|--------|---------------|------|-------------|--------------|--------------|---------|
| 1      | 15.695        | BB   | 1.0187      | 9002.20996   | 133.16742    | 95.9956 |
| 2      | 31.396        | BB   | 0.8082      | 375.52078    | 5.47481      | 4.0044  |

Totals : 9377.73074 138.64223

### Ethyl 2'-hydroxy-1,8'-dimethyl-2,10'-dioxo-2',3'-dihydro-10'H-spiro[indoline-3,4'-pyrano[3,2-b]chromene]-2'-carboxylate 4v

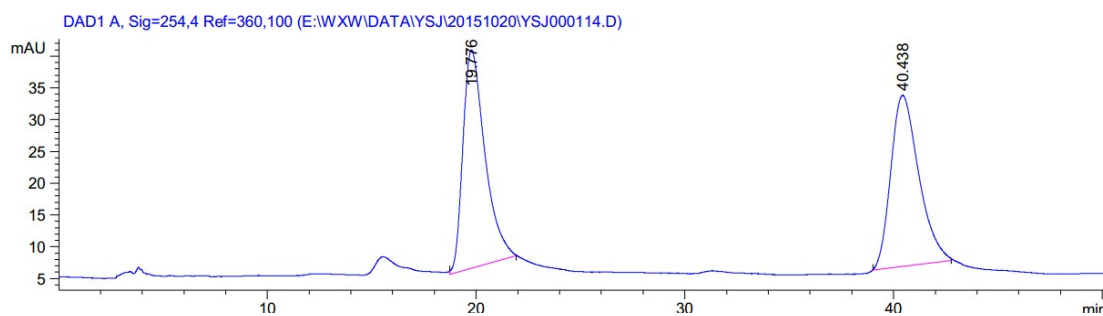

| Peak # | RetTime [min] | Type | Width [min] | Area [mAU*s] | Height [mAU] | Area %  |
|--------|---------------|------|-------------|--------------|--------------|---------|
| 1      | 19.776        | MM R | 1.2252      | 2524.61938   | 34.34168     | 50.0575 |
| 2      | 40.438        | BB   | 1.3200      | 2518.82397   | 26.95934     | 49.9425 |

Totals : 5043.44336 61.30102

DAD1 A, Sig=254.4 Ref=360,100 (E:\WXW\DATA\YSJ20151020\YSJ000115.D)

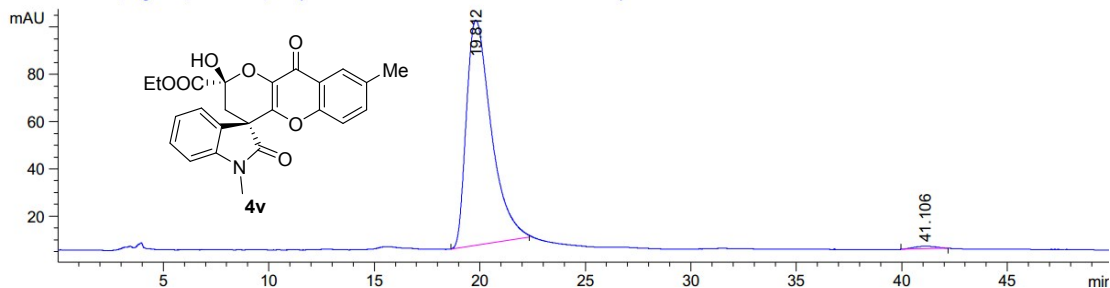

| Peak # | RetTime [min] | Type | Width [min] | Area [mAU*s] | Height [mAU] | Area %  |
|--------|---------------|------|-------------|--------------|--------------|---------|
| 1      | 19.812        | BB   | 1.2437      | 7788.38867   | 95.07392     | 98.9898 |
| 2      | 41.106        | MM R | 1.2343      | 79.48289     | 1.07323      | 1.0102  |

Totals : 7867.87157 96.14715

**Ethyl 2'-hydroxy-7'-methoxy-1-methyl-2,10'-dioxo-2',3'-dihydro-10'H-spiro [indoline-3,4'-pyrano[3,2-*b*]chromene]-2'-carboxylate 4w**

DAD1 A, Sig=254.4 Ref=360,100 (E:\WXW\DATA\YSJ20151020\YSJ000108.D)

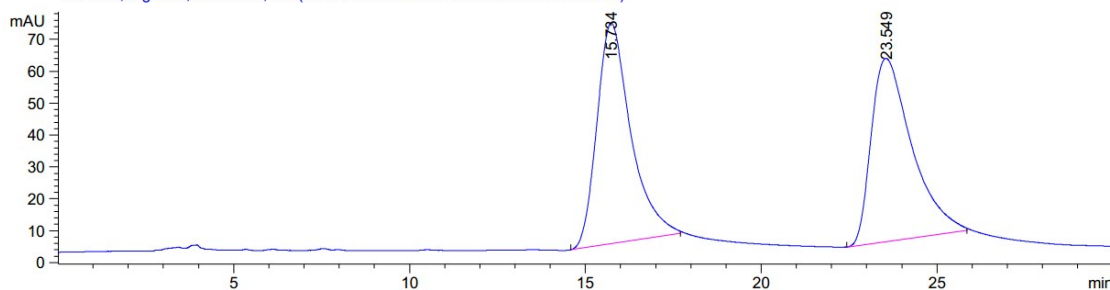

| Peak # | RetTime [min] | Type | Width [min] | Area [mAU*s] | Height [mAU] | Area %  |
|--------|---------------|------|-------------|--------------|--------------|---------|
| 1      | 15.734        | BB   | 0.9958      | 4638.27930   | 69.21696     | 50.1448 |
| 2      | 23.549        | BB   | 1.1932      | 4611.49463   | 57.53107     | 49.8552 |

Totals : 9249.77393 126.74802

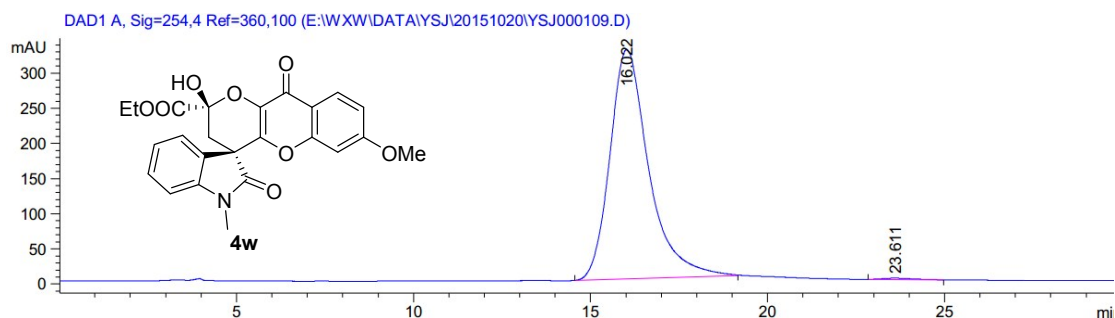

| Peak # | RetTime [min] | Type | Width [min] | Area [mAU*s] | Height [mAU] | Area %  |
|--------|---------------|------|-------------|--------------|--------------|---------|
| 1      | 16.022        | BB   | 1.1426      | 2.49009e4    | 326.20676    | 99.5273 |
| 2      | 23.611        | MM R | 1.0072      | 118.26797    | 1.95712      | 0.4727  |

Totals : 2.50192e4 328.16388

**Ethyl-2-hydroxy-1'-methyl-2',5,10-trioxo-2,3,5,10-tetrahydrospiro[benzo[g]chromene-4,3'-indoline]-2-carboxylate 6a**

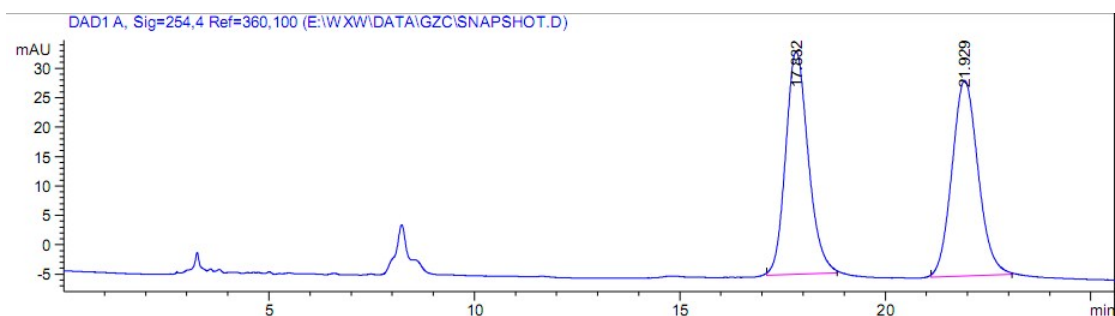

| Peak # | RetTime [min] | Type | Width [min] | Area [mAU*s] | Height [mAU] | Area %  |
|--------|---------------|------|-------------|--------------|--------------|---------|
| 1      | 17.832        | BB   | 0.5838      | 1448.11353   | 37.89828     | 49.6325 |
| 2      | 21.929        | BB   | 0.6798      | 1469.55640   | 33.23857     | 50.3675 |

Totals : 2917.66992 71.13685

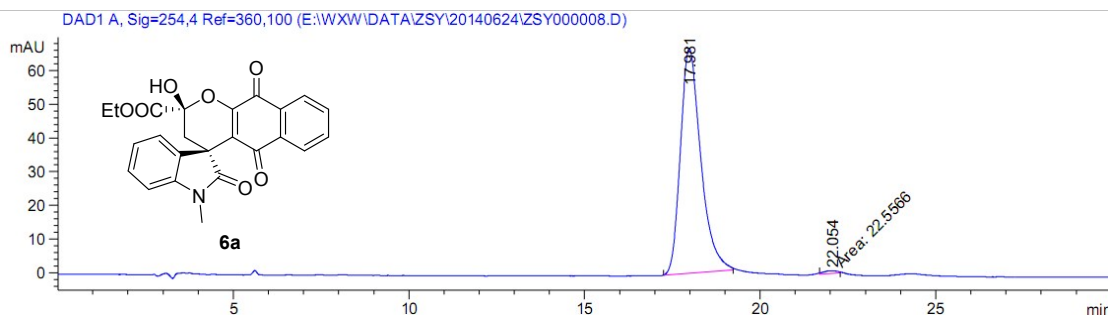

| Peak # | RetTime [min] | Type | Width [min] | Area [mAU*s] | Height [mAU] | Area %  |
|--------|---------------|------|-------------|--------------|--------------|---------|
| 1      | 17.981        | BB   | 0.6157      | 2696.38379   | 66.69093     | 99.1704 |
| 2      | 22.054        | MM   | 0.3451      | 22.55664     | 8.12515e-1   | 0.8296  |

Totals : 2718.94043 67.50345

**Ethyl-2-hydroxy-1'-(methoxymethyl)-2',5,10-trioxo-2,3,5,10-tetrahydrospiro[benzo[g]chromene-4,3'-indoline]-2-carboxylate 6b**

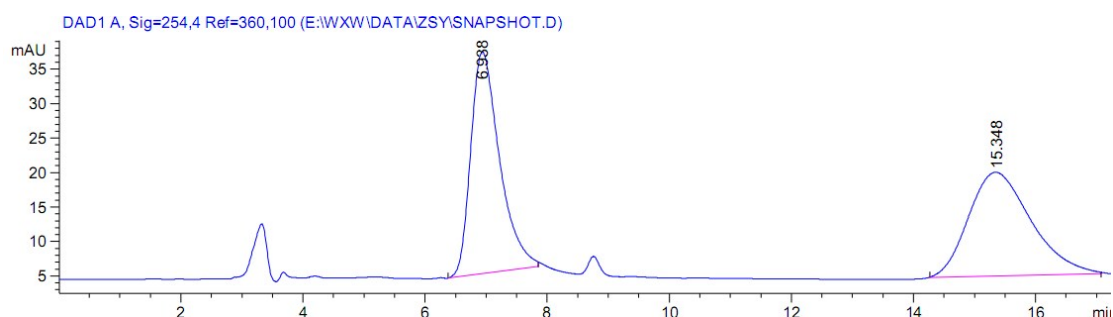

| Peak # | RetTime [min] | Type | Width [min] | Area [mAU*s] | Height [mAU] | Area %  |
|--------|---------------|------|-------------|--------------|--------------|---------|
| 1      | 6.938         | BB   | 0.4949      | 1056.68359   | 32.19254     | 49.7099 |
| 2      | 15.348        | BB   | 1.0463      | 1069.01794   | 15.05686     | 50.2901 |

Totals : 2125.70154 47.24940

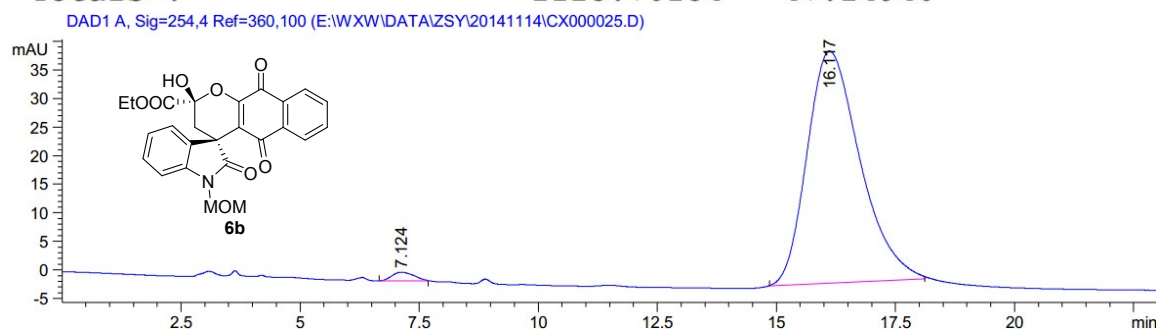

| Peak # | RetTime [min] | Type | Width [min] | Area [mAU*s] | Height [mAU] | Area %  |
|--------|---------------|------|-------------|--------------|--------------|---------|
| 1      | 7.124         | MM R | 0.5240      | 47.47104     | 1.50998      | 1.4911  |
| 2      | 16.117        | BB   | 1.1544      | 3136.22583   | 40.63460     | 98.5089 |

Totals : 3183.69687 42.14458

**Ethyl-1'-benzyl-2-hydroxy-2',5,10-trioxo-2,3,5,10-tetrahydrospiro[benzo[g]chromene-4,3'-indoline]-2-carboxylate 6c**

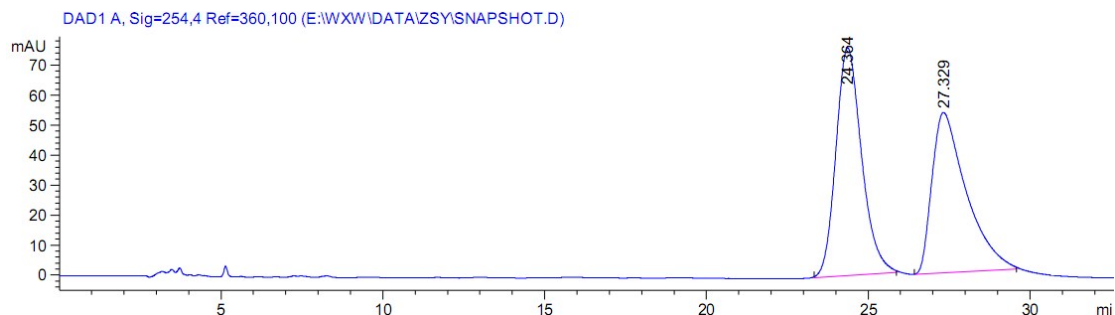

| Peak # | RetTime [min] | Type | Width [min] | Area [mAU*s] | Height [mAU] | Area %  |
|--------|---------------|------|-------------|--------------|--------------|---------|
| 1      | 24.364        | BB   | 0.8469      | 4197.37402   | 75.93567     | 51.5773 |
| 2      | 27.329        | BB   | 1.0733      | 3940.64893   | 53.50246     | 48.4227 |

Totals : 8138.02295 129.43813

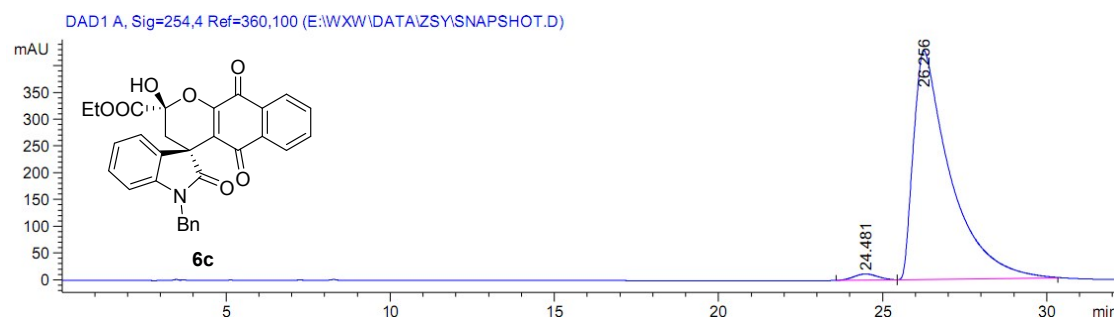

| Peak # | RetTime [min] | Type | Width [min] | Area [mAU*s] | Height [mAU] | Area %  |
|--------|---------------|------|-------------|--------------|--------------|---------|
| 1      | 24.481        | BV   | 0.7807      | 583.87915    | 11.53107     | 1.7213  |
| 2      | 26.256        | VB   | 1.1262      | 3.33361e4    | 427.31015    | 98.2787 |

Totals : 3.39200e4 438.84122

**Ethyl-1'-allyl-2-hydroxy-2',5,10-trioxo-2,3,5,10-tetrahydrospiro[benzo[g]chromene-4,3'-indoline]-2-carboxylate 6d**

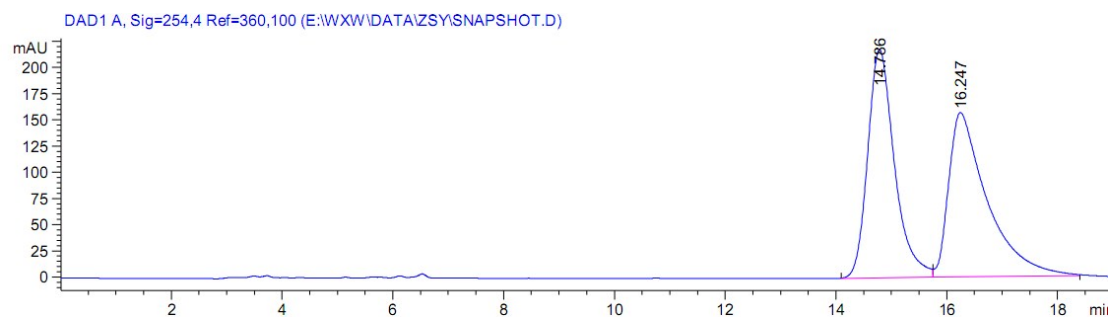

| Peak # | RetTime [min] | Type | Width [min] | Area [mAU*s] | Height [mAU] | Area %  |
|--------|---------------|------|-------------|--------------|--------------|---------|
| 1      | 14.786        | BV   | 0.5107      | 7334.21973   | 217.90457    | 49.1801 |
| 2      | 16.247        | VB   | 0.6968      | 7578.76611   | 157.10030    | 50.8199 |

Totals : 1.49130e4 375.00487

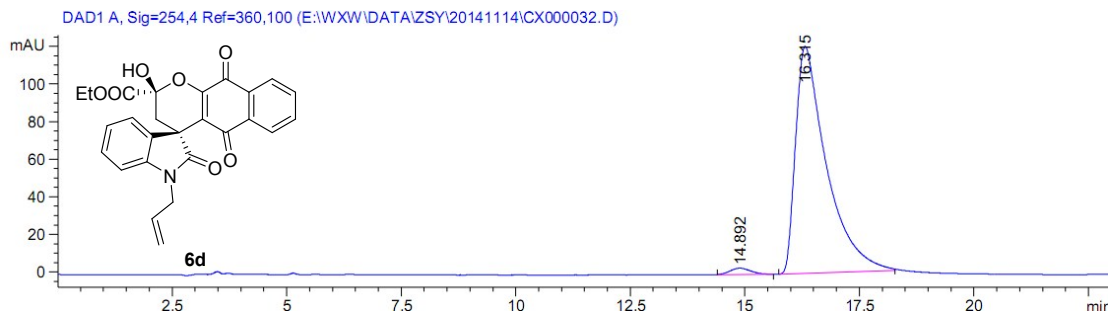

| Peak # | RetTime [min] | Type | Width [min] | Area [mAU*s] | Height [mAU] | Area %  |
|--------|---------------|------|-------------|--------------|--------------|---------|
| 1      | 14.892        | BB   | 0.4700      | 107.36703    | 3.40346      | 1.8652  |
| 2      | 16.315        | BB   | 0.6798      | 5648.83252   | 120.75301    | 98.1348 |

Totals : 5756.19955 124.15646

**1'-benzyl-2-ethyl-2-hydroxy-2',5,10-trioxo-2,3,5,10-tetrahydrospiro[benzo[g]chromene-4,3'-indoline]-1',2-dicarboxylate 6e**

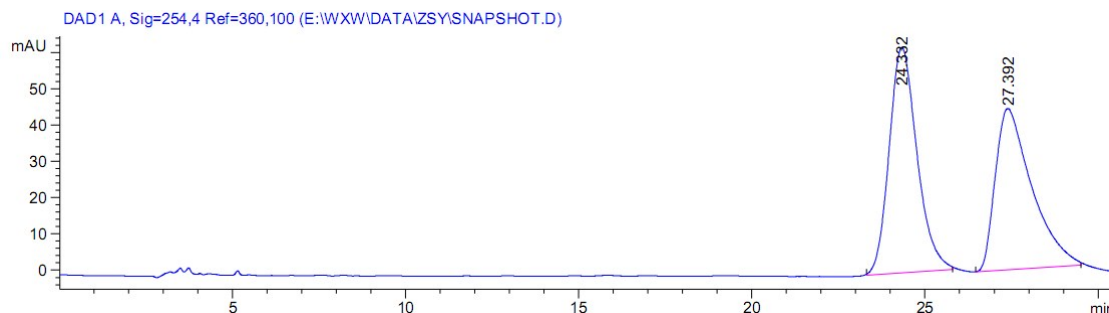

| Peak # | RetTime [min] | Type | Width [min] | Area [mAU*s] | Height [mAU] | Area %  |
|--------|---------------|------|-------------|--------------|--------------|---------|
| 1      | 24.332        | BB   | 0.8458      | 3473.16821   | 62.16756     | 51.6697 |
| 2      | 27.392        | BB   | 1.0721      | 3248.69531   | 44.48141     | 48.3303 |

Totals : 6721.86353 106.64897



DAD1 A, Sig=254.4 Ref=360,100 (E:\WXW\DATA\ZSY\20141114\CX000034.D)

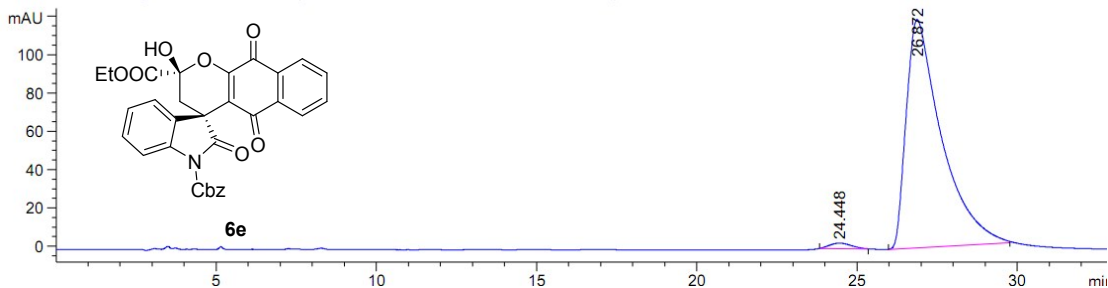

| Peak # | RetTime [min] | Type | Width [min] | Area [mAU*s] | Height [mAU] | Area %  |
|--------|---------------|------|-------------|--------------|--------------|---------|
| 1      | 24.448        | BB   | 0.5933      | 146.48157    | 3.00159      | 1.5821  |
| 2      | 26.872        | BB   | 1.1189      | 9111.98145   | 119.05298    | 98.4179 |

Totals : 9258.46301 122.05457

**Ethyl-1'-acetyl-2-hydroxy-2',5,10-trioxo-2,3,5,10-tetrahydrospiro[benzo[g]chromene-4,3'-indoline]-2-carboxylate 6f**

DAD1 A, Sig=254.4 Ref=360,100 (SNAPSHOT.D)

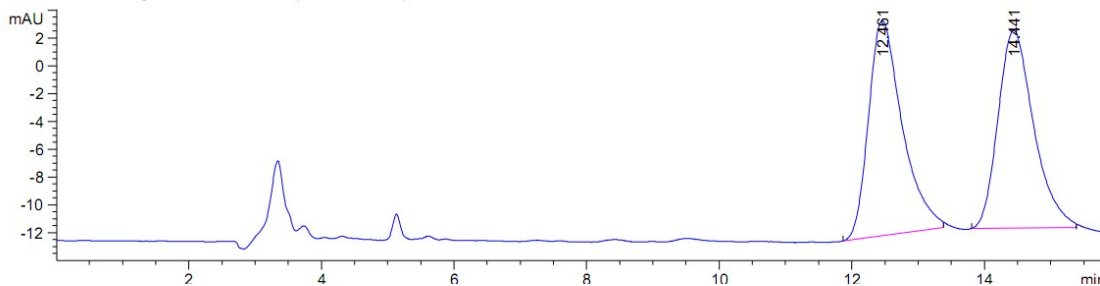

| Peak # | RetTime [min] | Type | Width [min] | Area [mAU*s] | Height [mAU] | Area %  |
|--------|---------------|------|-------------|--------------|--------------|---------|
| 1      | 12.461        | BB   | 0.5252      | 545.09662    | 15.46523     | 50.6342 |
| 2      | 14.441        | BB   | 0.5704      | 531.44202    | 14.20676     | 49.3658 |

Totals : 1076.53864 29.67199

DAD1 A, Sig=254.4 Ref=360,100 (E:\WXW\DATA\ZSY\SNAPSHOT.D)

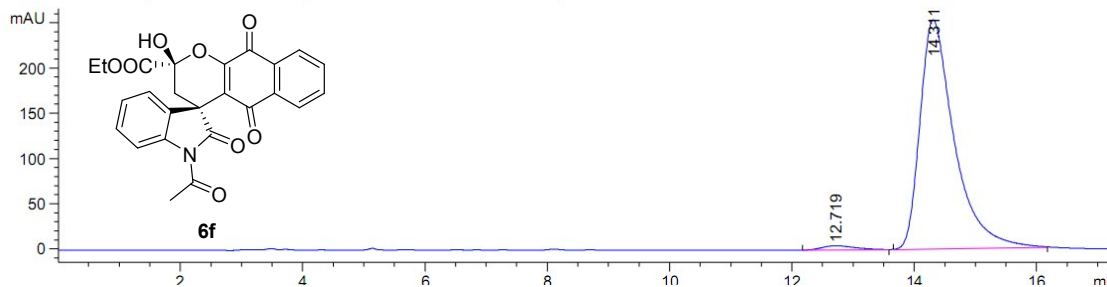

| Peak # | RetTime [min] | Type | Width [min] | Area [mAU*s] | Height [mAU] | Area %  |
|--------|---------------|------|-------------|--------------|--------------|---------|
| 1      | 12.719        | BB   | 0.5367      | 169.73434    | 4.64057      | 1.6889  |
| 2      | 14.311        | BB   | 0.5813      | 9880.06836   | 253.14079    | 98.3111 |

Totals : 1.00498e4 257.78137

**Ethyl-5'-fluoro-2-hydroxy-1'-methyl-2',5,10-trioxo-2,3,5,10-tetrahydrospiro[benzo[g]chromene-4,3'-indoline]-2-carboxylate 6g**

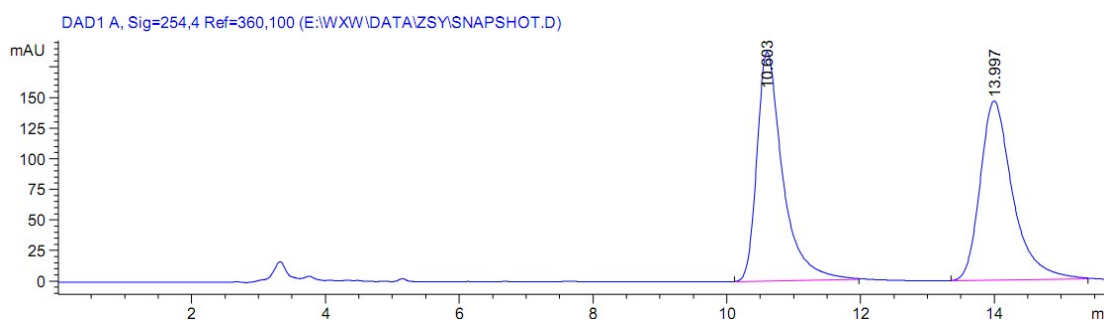

| Peak # | RetTime [min] | Type | Width [min] | Area [mAU*s] | Height [mAU] | Area %  |
|--------|---------------|------|-------------|--------------|--------------|---------|
| 1      | 10.603        | BB   | 0.3962      | 5012.96289   | 187.33189    | 50.2219 |
| 2      | 13.997        | BB   | 0.5097      | 4968.66504   | 146.50003    | 49.7781 |

Totals : 9981.62793 333.83192

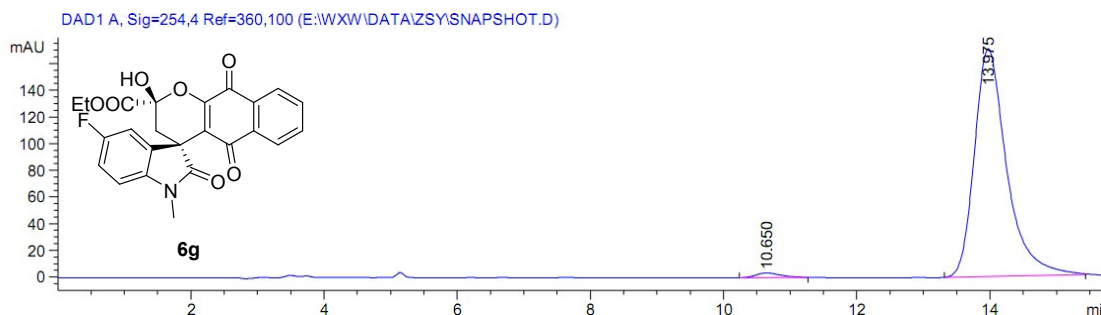

| Peak # | RetTime [min] | Type | Width [min] | Area [mAU*s] | Height [mAU] | Area %  |
|--------|---------------|------|-------------|--------------|--------------|---------|
| 1      | 10.650        | BB   | 0.3819      | 93.46729     | 3.56514      | 1.5989  |
| 2      | 13.975        | BB   | 0.5070      | 5752.07910   | 170.75229    | 98.4011 |

Totals : 5845.54639 174.31743

**Ethyl-5'-chloro-2-hydroxy-1'-methyl-2',5,10-trioxo-2,3,5,10-tetrahydrospiro[benzo[g]chromene-4,3'-indoline]-2-carboxylate 6h**

DAD1 A, Sig=254,4 Ref=360,100 (E:\WXW\DATA\ZSY\SNAPSHOT.D)

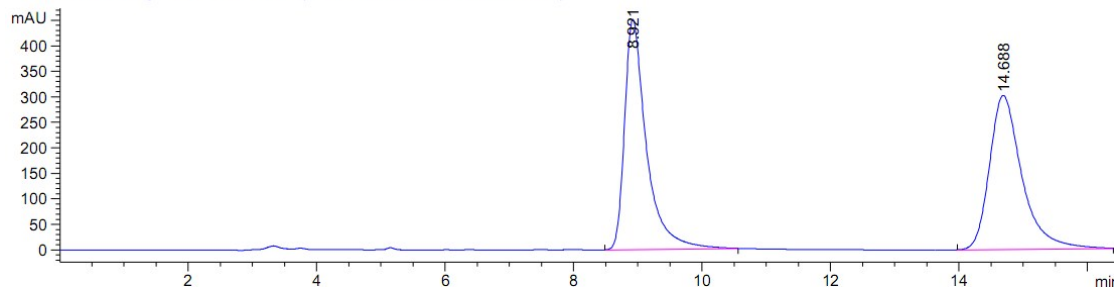

| Peak # | RetTime [min] | Type | Width [min] | Area [mAU*s] | Height [mAU] | Area %  |
|--------|---------------|------|-------------|--------------|--------------|---------|
| 1      | 8.921         | BB   | 0.3486      | 1.06937e4    | 450.99490    | 50.2570 |
| 2      | 14.688        | BB   | 0.5250      | 1.05844e4    | 301.91107    | 49.7430 |

Totals : 2.12781e4 752.90598

DAD1 A, Sig=254,4 Ref=360,100 (E:\WXW\DATA\ZSY\20141029\CX000029.D)

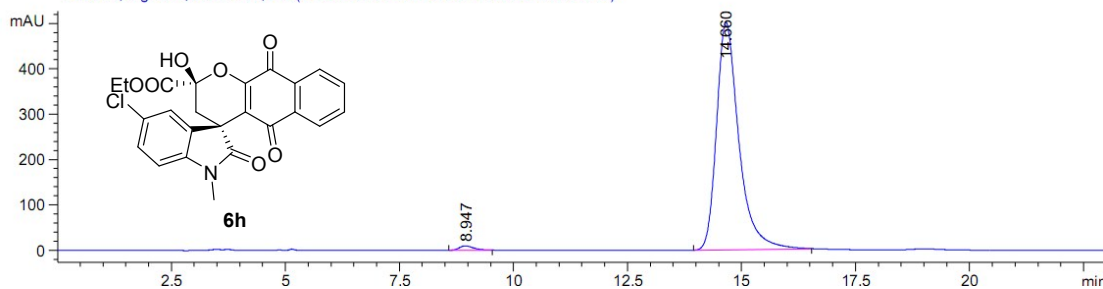

| Peak # | RetTime [min] | Type | Width [min] | Area [mAU*s] | Height [mAU] | Area %  |
|--------|---------------|------|-------------|--------------|--------------|---------|
| 1      | 8.947         | BB   | 0.3389      | 222.97485    | 9.81894      | 1.2845  |
| 2      | 14.660        | BB   | 0.5122      | 1.71357e4    | 502.06799    | 98.7155 |

Totals : 1.73587e4 511.88693

**Ethyl-5'-bromo-2-hydroxy-1'-methyl-2',5,10-trioxo-2,3,5,10-tetrahydrospiro[benzo[g]chromene-4,3'-indoline]-2-carboxylate 6i**

DAD1 A, Sig=254,4 Ref=360,100 (E:\WXW\DATA\ZSY\SNAPSHOT.D)

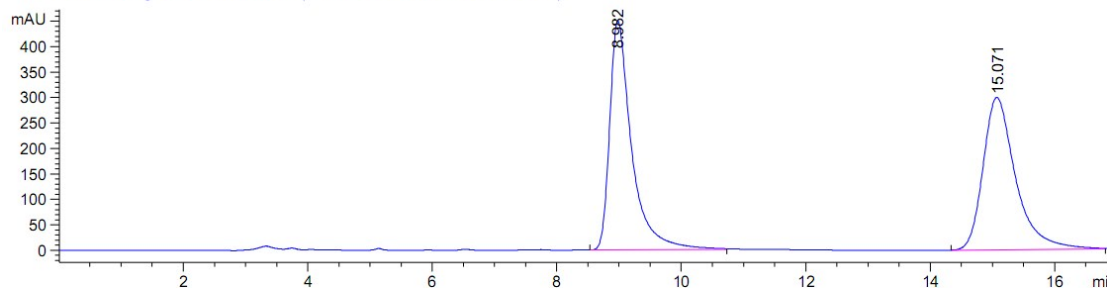

| Peak # | RetTime [min] | Type | Width [min] | Area [mAU*s] | Height [mAU] | Area %  |
|--------|---------------|------|-------------|--------------|--------------|---------|
| 1      | 8.982         | VB   | 0.3620      | 1.10359e4    | 450.25565    | 50.3668 |
| 2      | 15.071        | BB   | 0.5459      | 1.08751e4    | 299.31036    | 49.6332 |

Totals : 2.19110e4 749.56601

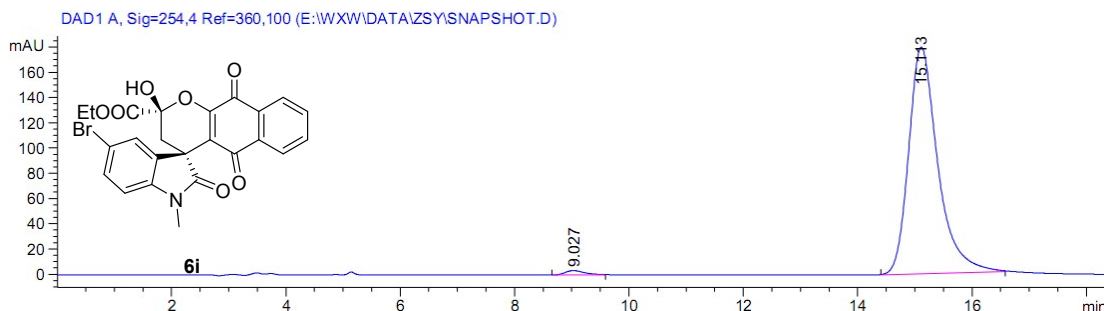

| Peak # | RetTime [min] | Type | Width [min] | Area [mAU*s] | Height [mAU] | Area %  |
|--------|---------------|------|-------------|--------------|--------------|---------|
| 1      | 9.027         | BB   | 0.3549      | 81.02819     | 3.43909      | 1.2582  |
| 2      | 15.113        | BB   | 0.5333      | 6359.01563   | 179.48303    | 98.7418 |

Totals : 6440.04382 182.92212

**Ethyl-2-hydroxy-1',5'-dimethyl-2',5,10-trioxo-2,3,5,10-tetrahydrospiro[benzo[g]chromene-4,3'-indoline]-2-carboxylate 6j**

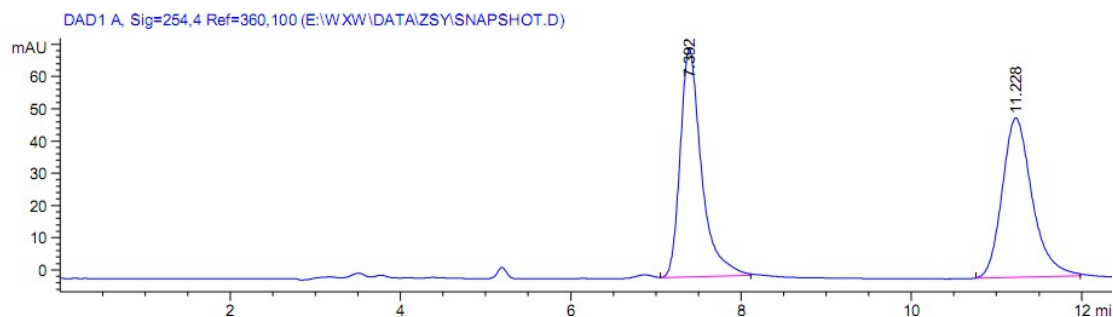

| Peak # | RetTime [min] | Type | Width [min] | Area [mAU*s] | Height [mAU] | Area %  |
|--------|---------------|------|-------------|--------------|--------------|---------|
| 1      | 7.392         | VB   | 0.2611      | 1228.95825   | 70.58884     | 50.3530 |
| 2      | 11.228        | BB   | 0.3719      | 1211.72485   | 49.44472     | 49.6470 |

Totals : 2440.68311 120.03355

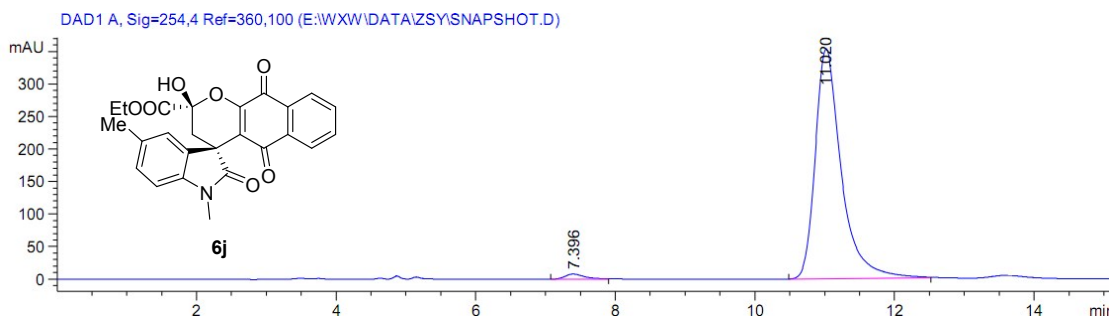

| Peak # | RetTime [min] | Type | Width [min] | Area [mAU*s] | Height [mAU] | Area %  |
|--------|---------------|------|-------------|--------------|--------------|---------|
| 1      | 7.396         | BB   | 0.2856      | 148.39984    | 7.81373      | 1.5917  |
| 2      | 11.020        | BB   | 0.3887      | 9174.66406   | 353.66498    | 98.4083 |

Totals : 9323.06390 361.47870

**Ethyl-2-hydroxy-5'-methoxy-1'-methyl-2',5,10-trioxo-2,3,5,10-tetrahydrospiro[benzo[g]chromene-4,3'-indoline]-2-carboxylate 6k**

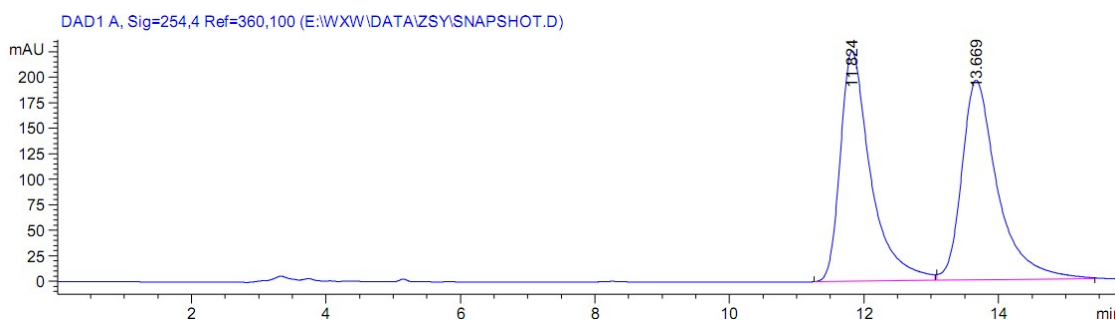

| Peak # | RetTime [min] | Type | Width [min] | Area [mAU*s] | Height [mAU] | Area %  |
|--------|---------------|------|-------------|--------------|--------------|---------|
| 1      | 11.824        | BB   | 0.4654      | 7111.09766   | 225.82668    | 49.5036 |
| 2      | 13.669        | BB   | 0.5480      | 7253.70947   | 195.89703    | 50.4964 |

Totals : 1.43648e4 421.72371

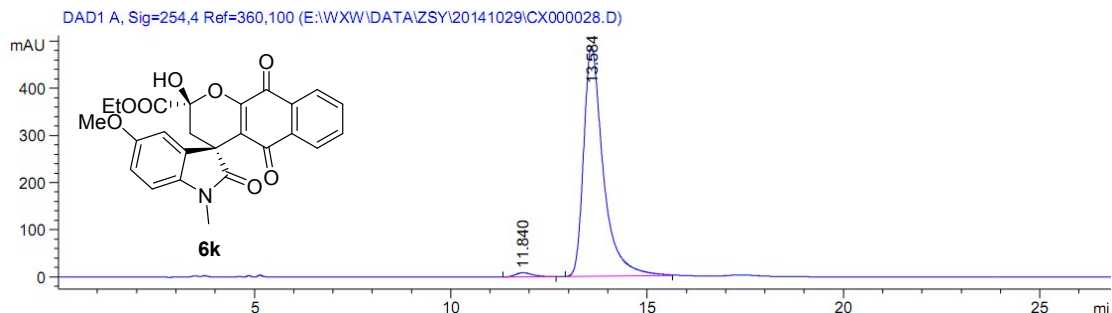

| Peak # | RetTime [min] | Type | Width [min] | Area [mAU*s] | Height [mAU] | Area %  |
|--------|---------------|------|-------------|--------------|--------------|---------|
| 1      | 11.840        | BB   | 0.4464      | 264.84549    | 8.91912      | 1.5432  |
| 2      | 13.584        | BB   | 0.5146      | 1.68968e4    | 487.22214    | 98.4568 |

Totals : 1.71617e4 496.14126

**Ethyl-6'-chloro-2-hydroxy-1'-methyl-2',5,10-trioxo-2,3,5,10-tetrahydrospiro[benzo[g]chromene-4,3'-indoline]-2-carboxylate 6l**

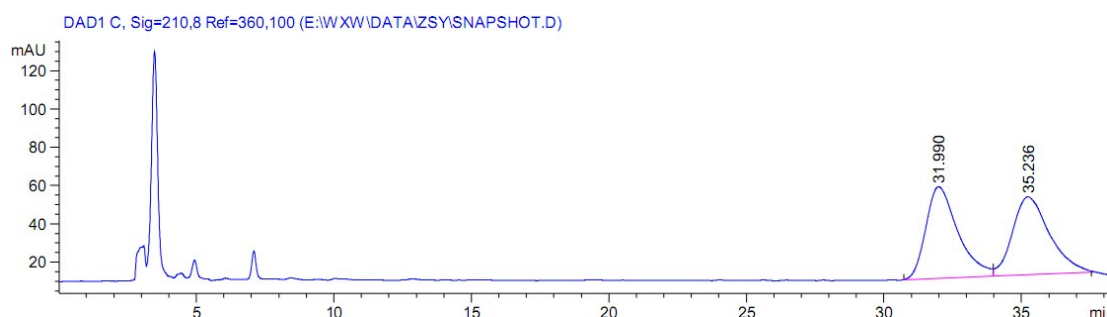

| Peak # | RetTime [min] | Type | Width [min] | Area [mAU*s] | Height [mAU] | Area %  |
|--------|---------------|------|-------------|--------------|--------------|---------|
| 1      | 31.990        | BB   | 1.1777      | 3894.71045   | 47.84369     | 50.6530 |
| 2      | 35.236        | BB   | 1.2792      | 3794.28589   | 40.64005     | 49.3470 |

Totals : 7688.99634 88.48373

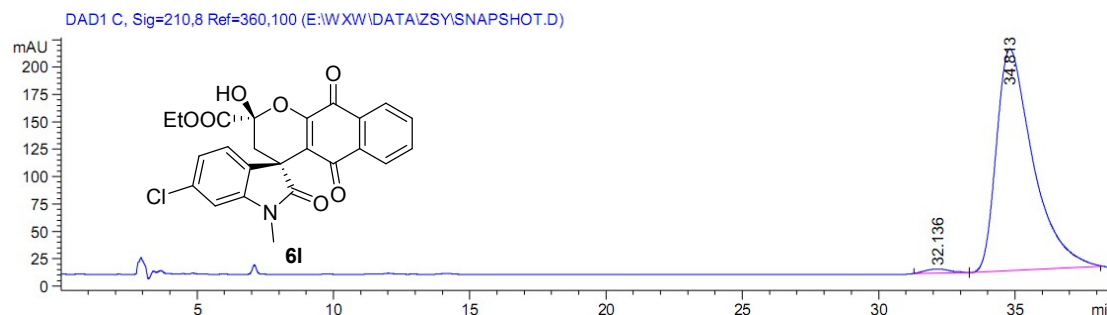

| Peak # | RetTime [min] | Type | Width [min] | Area [mAU*s] | Height [mAU] | Area %  |
|--------|---------------|------|-------------|--------------|--------------|---------|
| 1      | 32.136        | BV   | 0.7702      | 253.28360    | 3.87711      | 1.3232  |
| 2      | 34.813        | VB   | 1.3462      | 1.88884e4    | 202.87770    | 98.6768 |

Totals : 1.91417e4 206.75481

**Ethyl-6'-bromo-2-hydroxy-1'-methyl-2',5,10-trioxo-2,3,5,10-tetrahydrospiro[benzo[g]chromene-4,3'-indoline]-2-carboxylate 6m**

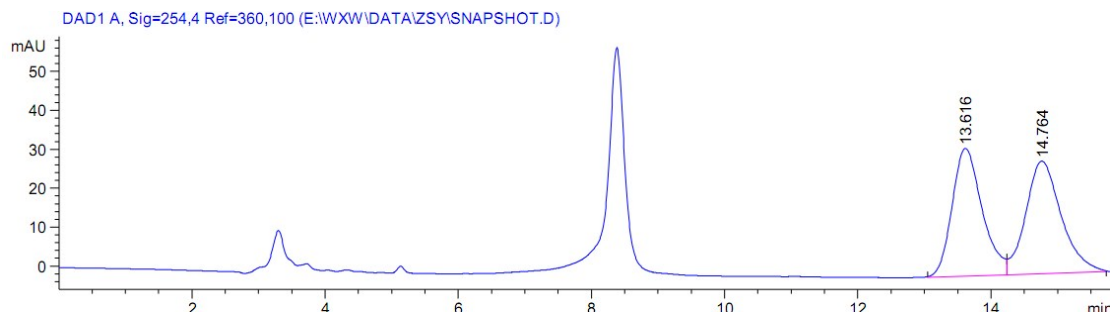

| Peak # | RetTime [min] | Type | Width [min] | Area [mAU*s] | Height [mAU] | Area %  |
|--------|---------------|------|-------------|--------------|--------------|---------|
| 1      | 13.616        | BV   | 0.4757      | 1028.76245   | 32.82059     | 48.9957 |
| 2      | 14.764        | VB   | 0.5560      | 1070.93665   | 28.92279     | 51.0043 |

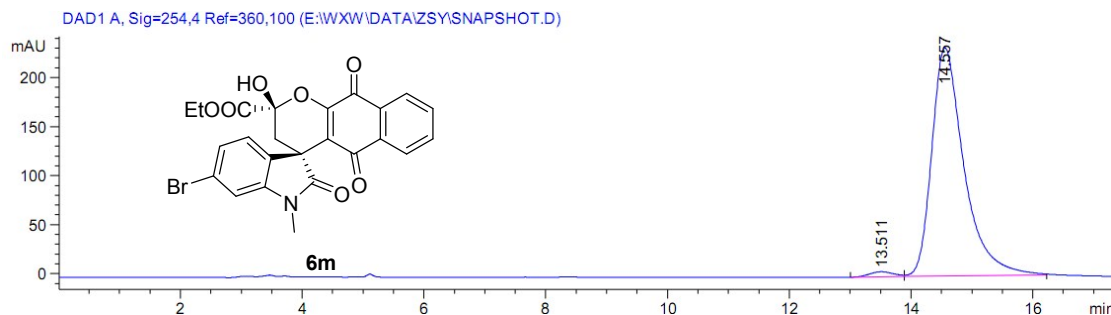

| Peak # | RetTime [min] | Type | Width [min] | Area [mAU*s] | Height [mAU] | Area %  |
|--------|---------------|------|-------------|--------------|--------------|---------|
| 1      | 13.511        | BV   | 0.4278      | 142.38757    | 5.16267      | 1.6358  |
| 2      | 14.557        | VB   | 0.5513      | 8562.33496   | 232.69293    | 98.3642 |

Totals : 8704.72253 237.85561

**Ethyl-2-hydroxy-6'-methoxy-1'-methyl-2',5,10-trioxo-2,3,5,10-tetrahydrospiro[benzo[g]chromene-4,3'-indoline]-2-carboxylate 6n**

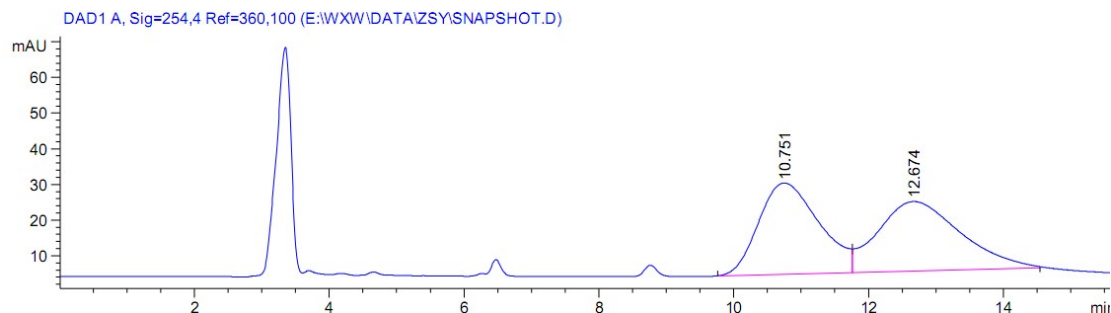

| Peak # | RetTime [min] | Type | Width [min] | Area [mAU*s] | Height [mAU] | Area %  |
|--------|---------------|------|-------------|--------------|--------------|---------|
| 1      | 10.751        | BV   | 0.9416      | 1595.52100   | 25.58156     | 48.9236 |
| 2      | 12.674        | VB   | 1.2125      | 1665.72729   | 19.50119     | 51.0764 |

Totals : 3261.24829 45.08275

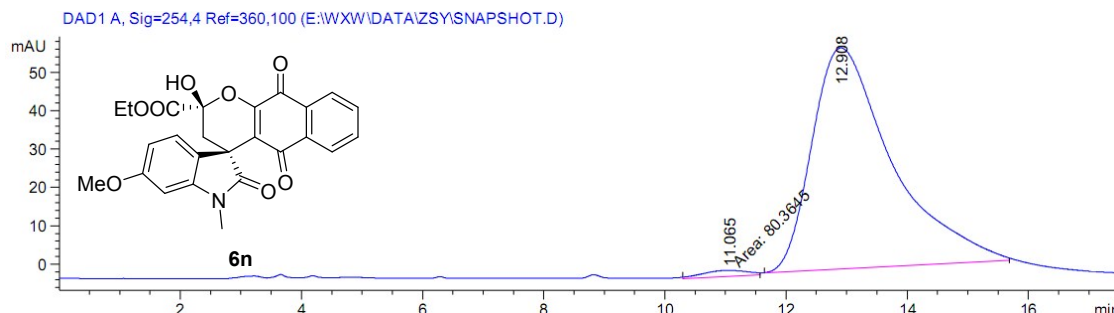

| Peak # | RetTime [min] | Type | Width [min] | Area [mAU*s] | Height [mAU] | Area %  |
|--------|---------------|------|-------------|--------------|--------------|---------|
| 1      | 11.065        | MM   | 0.6468      | 80.36452     | 1.50776      | 1.5007  |
| 2      | 12.908        | BB   | 1.3614      | 5274.90186   | 57.54477     | 98.4993 |

Totals : 5355.26637 59.05252

**Ethyl-7'-fluoro-2-hydroxy-1'-methyl-2',5,10-trioxo-2,3,5,10-tetrahydrospiro[benzo[g]chromene-4,3'-indoline]-2-carboxylate 6o**

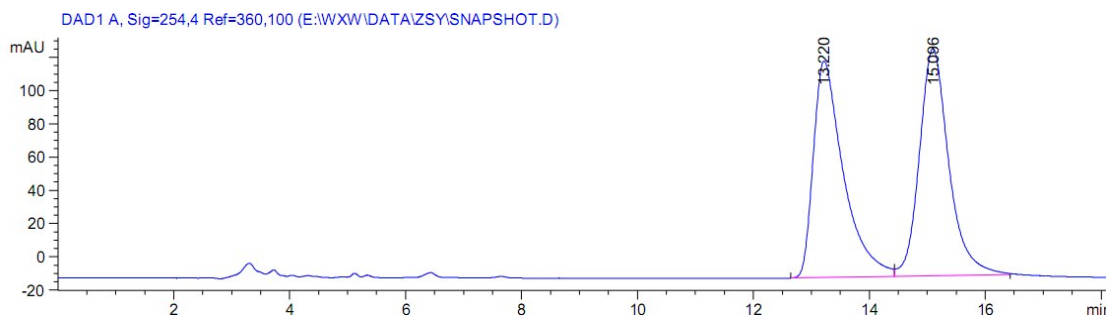

| Peak # | RetTime [min] | Type | Width [min] | Area [mAU*s] | Height [mAU] | Area %  |
|--------|---------------|------|-------------|--------------|--------------|---------|
| 1      | 13.220        | BV   | 0.5366      | 4698.39893   | 130.33797    | 49.2694 |
| 2      | 15.096        | VB   | 0.5351      | 4837.74072   | 136.62614    | 50.7306 |

Totals : 9536.13965 266.96411



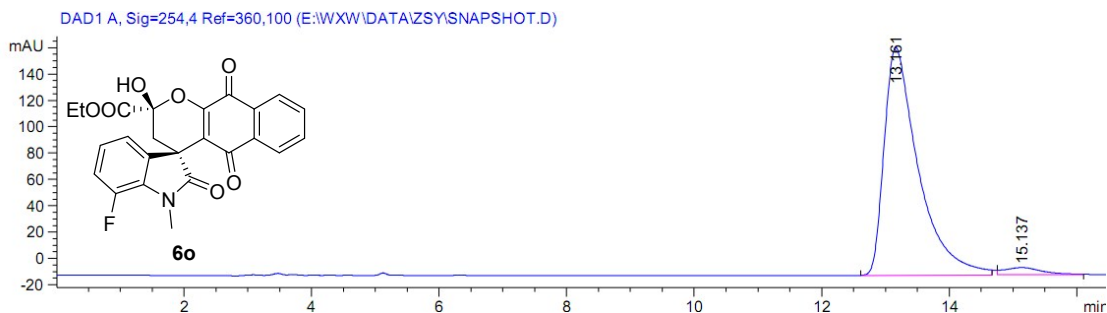

| Peak # | RetTime [min] | Type | Width [min] | Area [mAU*s] | Height [mAU] | Area %  |
|--------|---------------|------|-------------|--------------|--------------|---------|
| 1      | 13.161        | BB   | 0.5479      | 6432.60205   | 172.94328    | 96.6316 |
| 2      | 15.137        | BB   | 0.5768      | 224.22606    | 5.44093      | 3.3684  |

Totals : 6656.82811 178.38422

**Ethyl-2-hydroxy-1',7'-dimethyl-2',5,10-trioxo-2,3,5,10-tetrahydrospiro[benzo[g]chromene-4,3'-indoline]-2-carboxylate 6p**

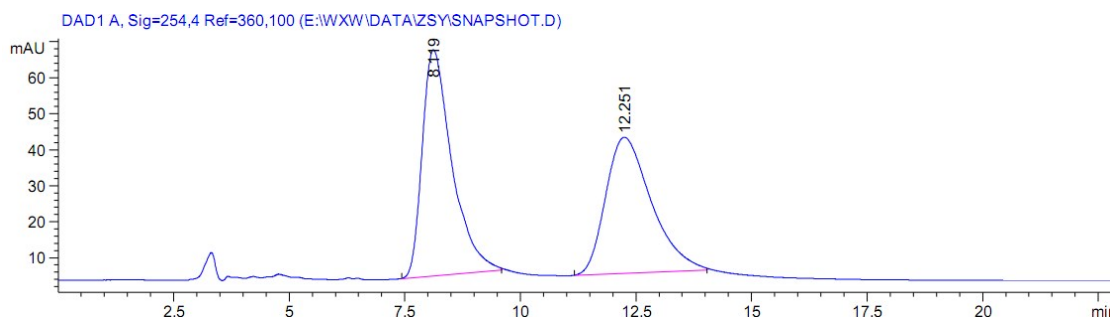

| Peak # | RetTime [min] | Type | Width [min] | Area [mAU*s] | Height [mAU] | Area %  |
|--------|---------------|------|-------------|--------------|--------------|---------|
| 1      | 8.119         | BB   | 0.6721      | 2809.10767   | 62.77014     | 51.9935 |
| 2      | 12.251        | BB   | 1.0397      | 2593.69434   | 37.74561     | 48.0065 |

Totals : 5402.80200 100.51575

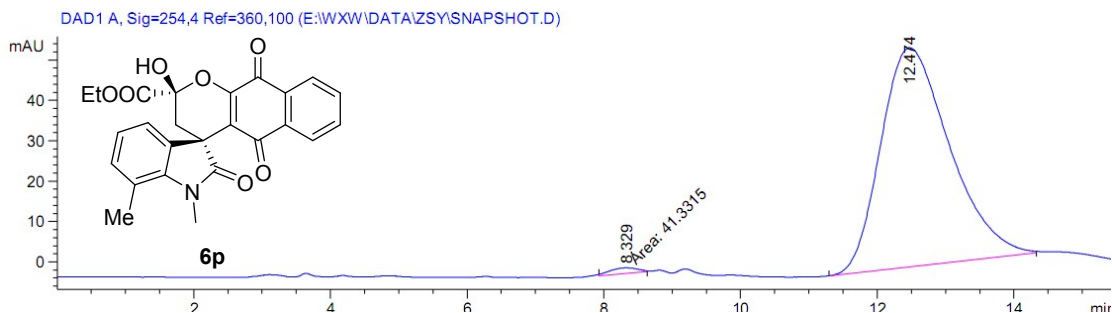

| Peak # | RetTime [min] | Type | Width [min] | Area [mAU*s] | Height [mAU] | Area %  |
|--------|---------------|------|-------------|--------------|--------------|---------|
| 1      | 8.329         | MM   | 0.4899      | 41.33153     | 1.40609      | 1.0764  |
| 2      | 12.474        | BB   | 1.0530      | 3798.54053   | 54.24078     | 98.9236 |

Totals : 3839.87206 55.64687

**Ethyl-2-hydroxy-1',5',7'-trimethyl-2',5,10-trioxo-2,3,5,10-**

**tetrahydrospiro[benzo[g]chromene-4,3'-indoline]-2-carboxylate 6q**

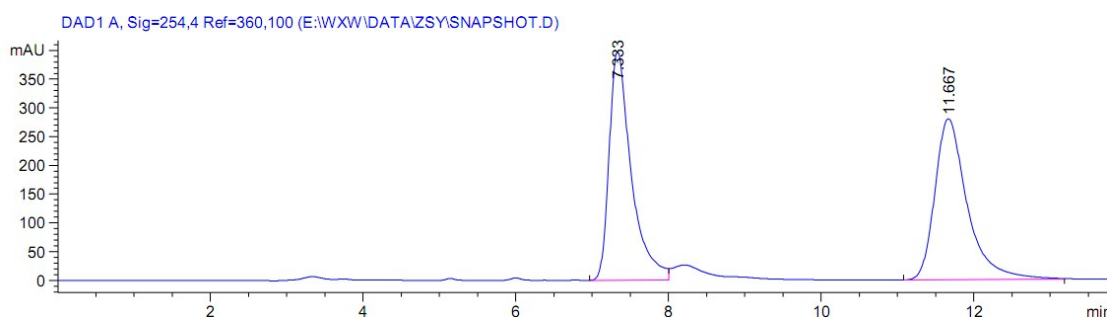

| Peak # | RetTime [min] | Type | Width [min] | Area [mAU*s] | Height [mAU] | Area %  |
|--------|---------------|------|-------------|--------------|--------------|---------|
| 1      | 7.333         | BV   | 0.2993      | 8018.89600   | 397.64301    | 49.2899 |
| 2      | 11.667        | BB   | 0.4415      | 8249.94434   | 280.24136    | 50.7101 |

Totals : 1.62688e4 677.88437

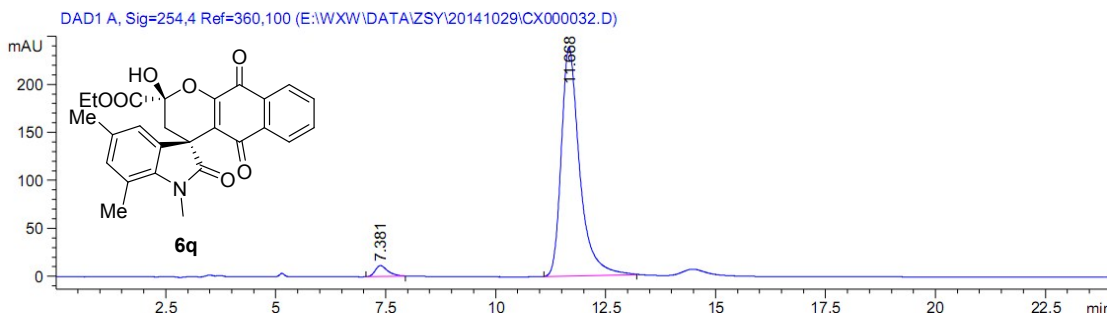

| Peak # | RetTime [min] | Type | Width [min] | Area [mAU*s] | Height [mAU] | Area %  |
|--------|---------------|------|-------------|--------------|--------------|---------|
| 1      | 7.381         | BB   | 0.3033      | 231.95744    | 11.40619     | 3.2345  |
| 2      | 11.668        | BB   | 0.4358      | 6939.35742   | 238.27428    | 96.7655 |

Totals : 7171.31487 249.68047

**Ethyl-5',6'-difluoro-2-hydroxy-1'-methyl-2',5,10-trioxo-2,3,5,10-tetrahydrospiro[benzo[g]chromene-4,3'-indoline]-2-carboxylate 6r**

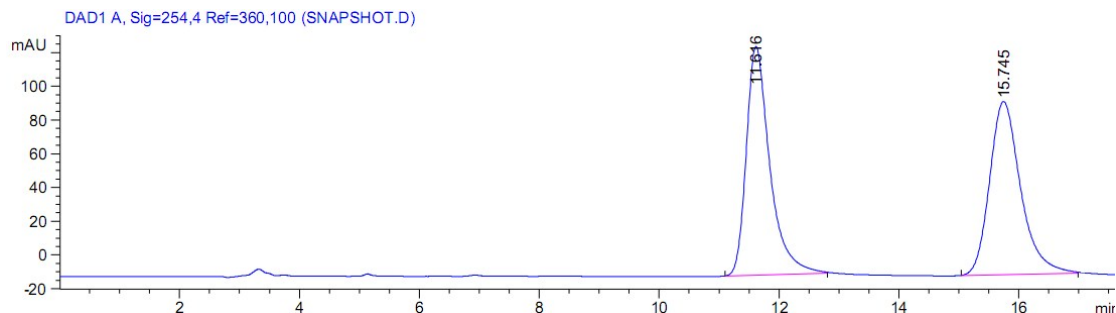

| Peak # | RetTime [min] | Type | Width [min] | Area [mAU*s] | Height [mAU] | Area %  |
|--------|---------------|------|-------------|--------------|--------------|---------|
| 1      | 11.616        | BB   | 0.4090      | 3706.02222   | 135.51880    | 50.0802 |
| 2      | 15.745        | BB   | 0.5478      | 3694.14624   | 102.66139    | 49.9198 |

Totals : 7400.16846 238.18019

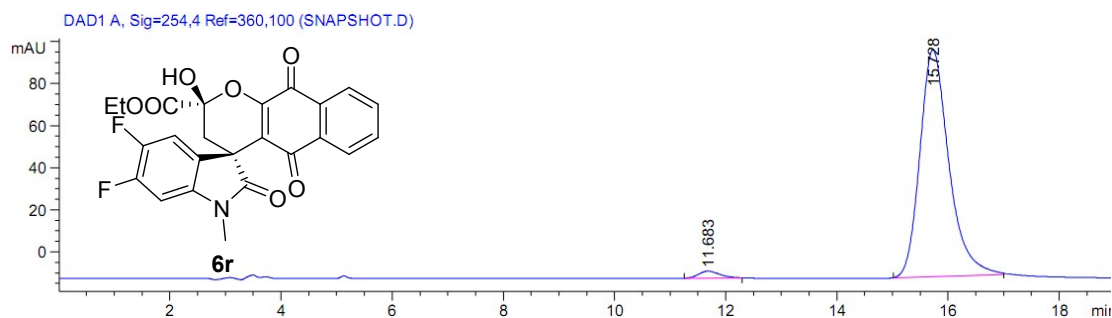

| Peak # | RetTime [min] | Type | Width [min] | Area [mAU*s] | Height [mAU] | Area %  |
|--------|---------------|------|-------------|--------------|--------------|---------|
| 1      | 11.683        | BB   | 0.4022      | 91.15219     | 3.38452      | 2.2733  |
| 2      | 15.728        | BB   | 0.5496      | 3918.56079   | 107.91299    | 97.7267 |

Totals : 4009.71298 111.29751

**Methyl-2-hydroxy-1'-methyl-2',5,10-trioxo-2,3,5,10-tetrahydrospiro[benzo[g]chromene-4,3'-indoline]-2-carboxylate 6s**

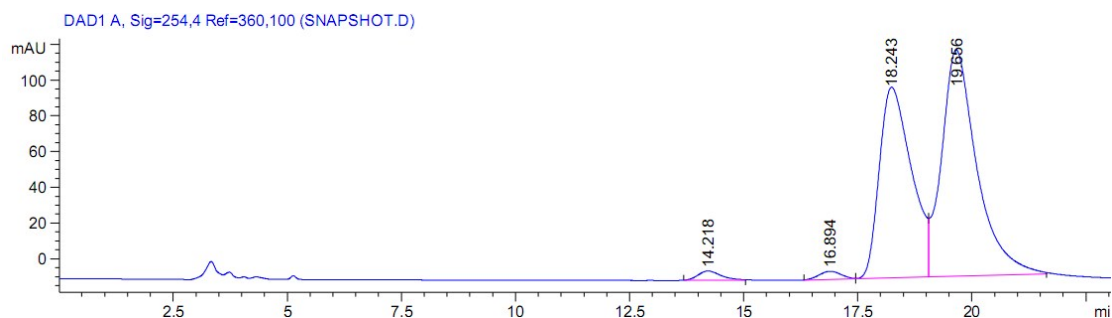

| Peak # | RetTime [min] | Type | Width [min] | Area [mAU*s] | Height [mAU] | Area %  |
|--------|---------------|------|-------------|--------------|--------------|---------|
| 1      | 14.218        | BB   | 0.5257      | 178.67189    | 5.16410      | 1.4451  |
| 2      | 16.894        | BV   | 0.5209      | 151.20691    | 4.53598      | 1.2230  |
| 3      | 18.243        | VV   | 0.7458      | 5228.24170   | 106.67732    | 42.2871 |
| 4      | 19.656        | VB   | 0.7871      | 6805.55029   | 126.60309    | 55.0447 |

Totals : 1.23637e4 242.98049

DAD1 A, Sig=254,4 Ref=360,100 (SNAPSHOT.D)

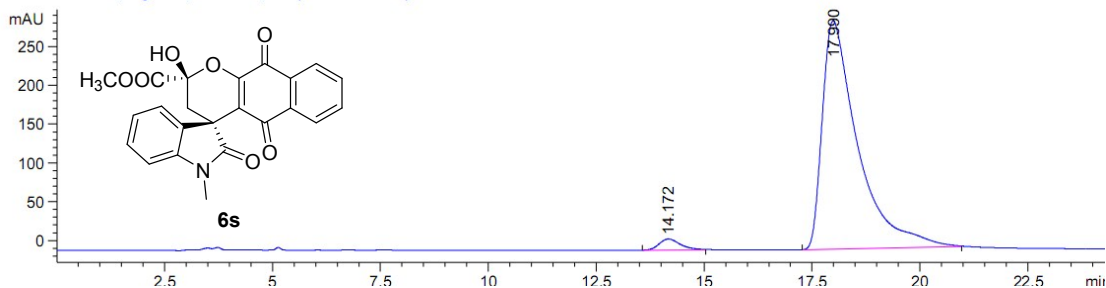

| Peak # | RetTime [min] | Type | Width [min] | Area [mAU*s] | Height [mAU] | Area %  |
|--------|---------------|------|-------------|--------------|--------------|---------|
| 1      | 14.172        | BB   | 0.5142      | 477.73090    | 14.13994     | 2.7595  |
| 2      | 17.990        | BB   | 0.8292      | 1.68343e4    | 294.38358    | 97.2405 |

Totals : 1.73121e4 308.52352

**Ethyl-2-hydroxy-1',7-dimethyl-2',5,10-trioxo-2,3,5,10-**

**tetrahydrospiro[benzo[g]chromene-4,3'-indoline]-2-carboxylate 6t**

DAD1 A, Sig=254,4 Ref=360,100 (E:\WXW\DATA\ZSY\SNAPSHOT.D)

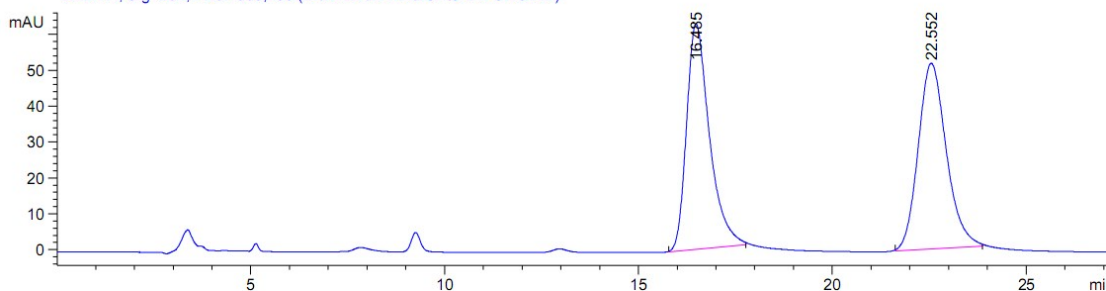

| Peak # | RetTime [min] | Type | Width [min] | Area [mAU*s] | Height [mAU] | Area %  |
|--------|---------------|------|-------------|--------------|--------------|---------|
| 1      | 16.485        | BB   | 0.6187      | 2578.53394   | 62.84503     | 49.7469 |
| 2      | 22.552        | BB   | 0.7692      | 2604.76709   | 51.74819     | 50.2531 |

Totals : 5183.30103 114.59322

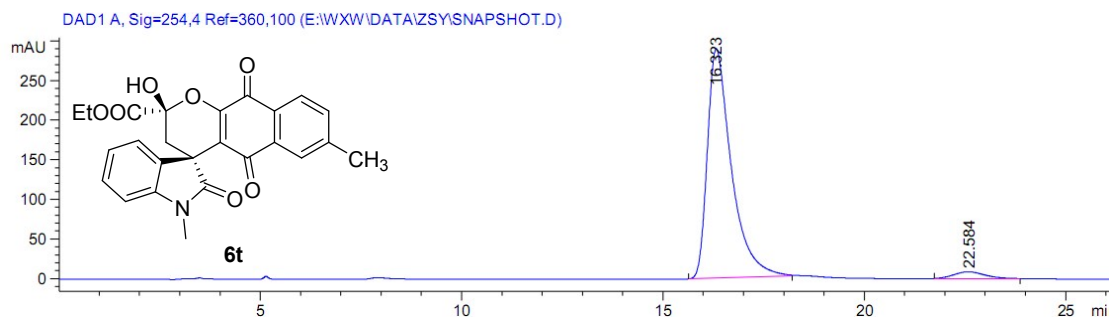

| Peak # | RetTime [min] | Type | Width [min] | Area [mAU*s] | Height [mAU] | Area %  |
|--------|---------------|------|-------------|--------------|--------------|---------|
| 1      | 16.323        | BB   | 0.6164      | 1.20090e4    | 289.21008    | 96.2763 |
| 2      | 22.584        | BB   | 0.7949      | 464.47089    | 8.58945      | 3.7237  |

Totals : 1.24734e4 297.79954

**Ethyl-7'-methoxy-1-methyl-2,10'-dioxo-2'-((trimethylsilyl)oxy)-2',3'-dihydro-10'H-spiro[indoline-3,4'-pyrano[3,2-b]chromene]-2'-carboxylate 7**

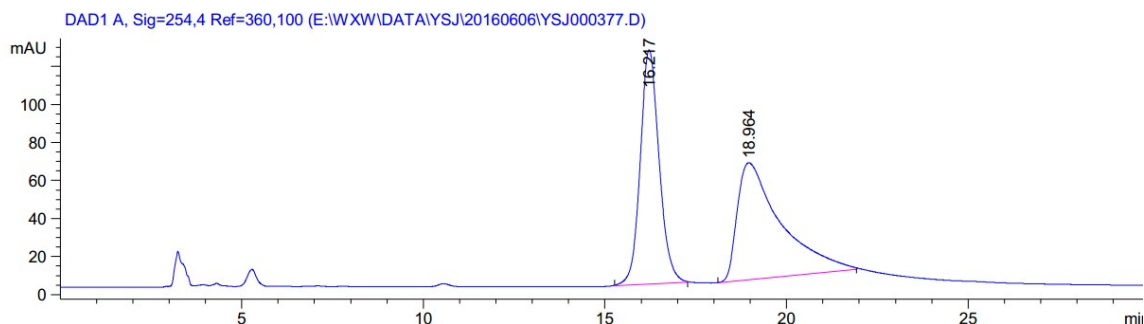

| Peak # | RetTime [min] | Type | Width [min] | Area [mAU*s] | Height [mAU] | Area %  |
|--------|---------------|------|-------------|--------------|--------------|---------|
| 1      | 16.217        | BB   | 0.5539      | 4451.29248   | 123.10169    | 46.5760 |
| 2      | 18.964        | BB   | 1.1594      | 5105.75879   | 61.44842     | 53.4240 |

Totals : 9557.05127 184.55011

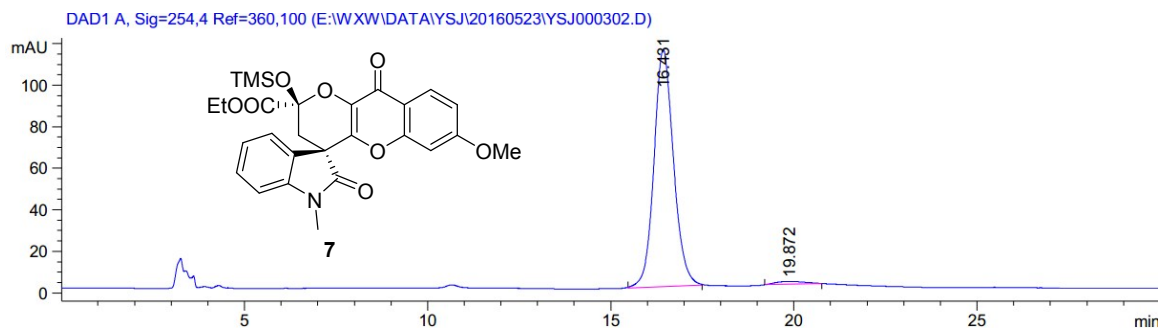

| Peak # | RetTime [min] | Type | Width [min] | Area [mAU*s] | Height [mAU] | Area %  |
|--------|---------------|------|-------------|--------------|--------------|---------|
| 1      | 16.431        | BB   | 0.5693      | 4237.82959   | 114.11116    | 98.2993 |
| 2      | 19.872        | MM R | 0.9135      | 73.32010     | 1.33773      | 1.7007  |

Totals : 4311.14969 115.44889

**Ethyl 1'-methyl-2-((methylthio)trioxidanyl)-2',5,10-trioxo-2,3,5,10-tetrahydrospiro[benzo[g]chromene-4,3'-indoline]-2-carboxylate 8**

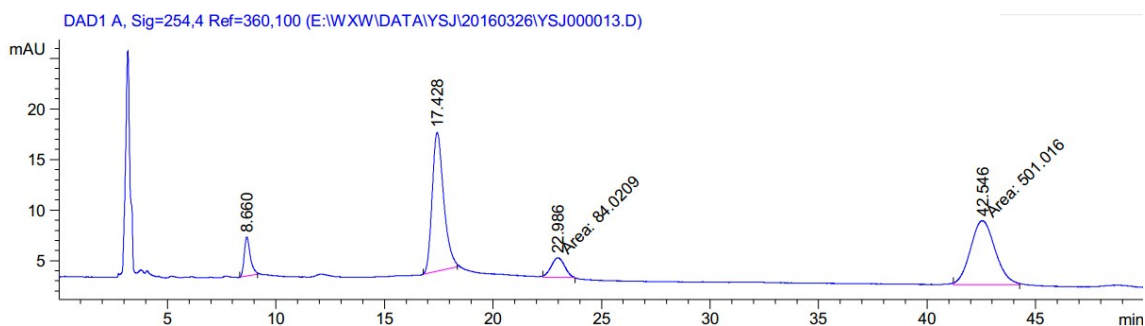

| Peak # | RetTime [min] | Type | Width [min] | Area [mAU*s] | Height [mAU] | Area %  |
|--------|---------------|------|-------------|--------------|--------------|---------|
| 1      | 8.660         | BB   | 0.2940      | 75.03631     | 3.87430      | 6.4299  |
| 2      | 17.428        | BB   | 0.5564      | 506.91077    | 13.74205     | 43.4377 |
| 3      | 22.986        | MM   | 0.7184      | 84.02094     | 1.94938      | 7.1998  |
| 4      | 42.546        | MM   | 1.3177      | 501.01611    | 6.33699      | 42.9326 |

Totals : 1166.98413 25.90272

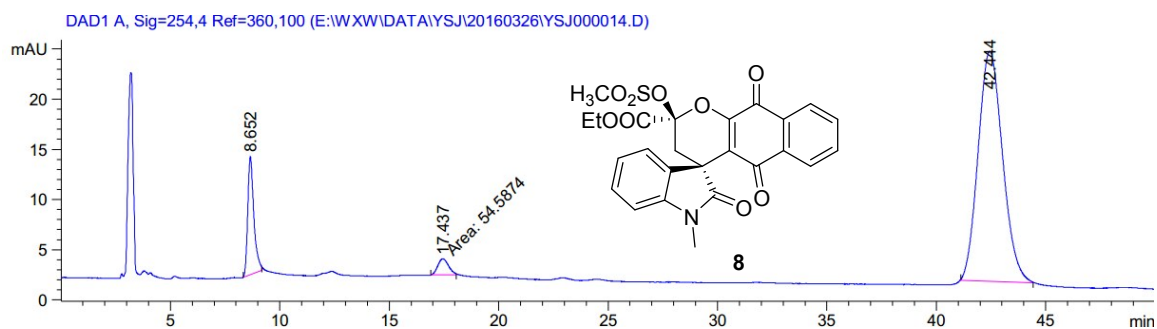

| Peak #   | RetTime [min] | Type | Width [min] | Area [mAU*s] | Height [mAU] | Area %  |
|----------|---------------|------|-------------|--------------|--------------|---------|
| 1        | 8.652         | BB   | 0.2911      | 226.63710    | 11.74415     | 10.9727 |
| 2        | 17.437        | MM   | 0.5693      | 54.58736     | 1.59797      | 2.6429  |
| 3        | 42.444        | BB   | 1.1079      | 1784.23010   | 22.92797     | 86.3844 |
| Totals : |               |      |             | 2065.45457   | 36.27010     |         |

## 6. Single-Crystal X-ray Crystallography of rac-4u

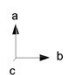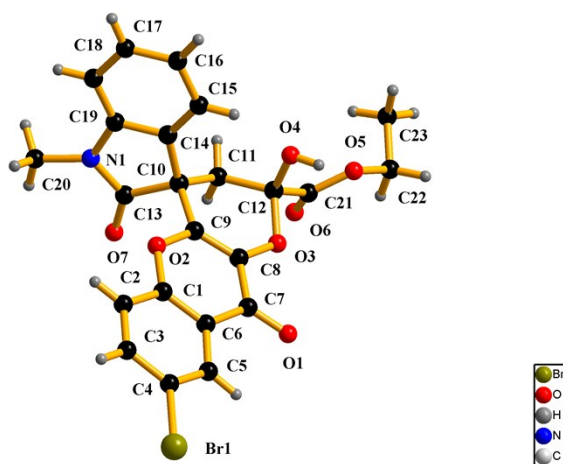

|                                      |                                                                                |
|--------------------------------------|--------------------------------------------------------------------------------|
| Identification code                  | g160108a                                                                       |
| Empirical formula                    | C <sub>49</sub> H <sub>36</sub> Br <sub>2</sub> N <sub>2</sub> O <sub>14</sub> |
| Formula weight                       | 1036.62                                                                        |
| Temperature/K                        | 293(2)                                                                         |
| Crystal system                       | monoclinic                                                                     |
| Space group                          | P2 <sub>1</sub> /c                                                             |
| a/Å                                  | 12.7894(8)                                                                     |
| b/Å                                  | 17.4413(12)                                                                    |
| c/Å                                  | 10.9644(7)                                                                     |
| α/°                                  | 90.00                                                                          |
| β/°                                  | 96.421(6)                                                                      |
| γ/°                                  | 90.00                                                                          |
| Volume/Å <sup>3</sup>                | 2430.4(3)                                                                      |
| Z                                    | 2                                                                              |
| ρ <sub>calc</sub> /g/cm <sup>3</sup> | 1.417                                                                          |
| μ/mm <sup>-1</sup>                   | 2.685                                                                          |
| F(000)                               | 1052.0                                                                         |
| Crystal size/mm <sup>3</sup>         | 0.3 × 0.15 × 0.1                                                               |



|                                                  |                                                               |
|--------------------------------------------------|---------------------------------------------------------------|
| Radiation                                        | CuK $\alpha$ ( $\lambda = 1.54184$ )                          |
| 2 $\Theta$ range for data collection/ $^{\circ}$ | 8.6 to 146.74                                                 |
| Index ranges                                     | $-15 \leq h \leq 15, -17 \leq k \leq 21, -13 \leq l \leq 11$  |
| Reflections collected                            | 9219                                                          |
| Independent reflections                          | 4746 [ $R_{\text{int}} = 0.0478, R_{\text{sigma}} = 0.0698$ ] |
| Data/restraints/parameters                       | 4746/17/319                                                   |
| Goodness-of-fit on $F^2$                         | 1.083                                                         |
| Final R indexes [ $I \geq 2\sigma(I)$ ]          | $R_1 = 0.0653, wR_2 = 0.1966$                                 |
| Final R indexes [all data]                       | $R_1 = 0.0942, wR_2 = 0.2246$                                 |
| Largest diff. peak/hole / e $\text{\AA}^{-3}$    | 0.88/-0.40                                                    |

The crystal was prepared from the solution of **4u** in ethyl acetate and n-hexane. CCDC 1446846 contains the supplementary crystallographic data for this paper. These data can be obtained free of charge from The Cambridge Crystallographic Data Centre via [www.ccdc.cam.ac.uk/data\\_request/cif](http://www.ccdc.cam.ac.uk/data_request/cif).
